# Supplementary material
Source: PubMed Central journal article supplement (PMC8232350)

**Supporting Information For:**

# **Catalytic Hydroxylcyclopropanol Ring-Opening Carbonylative Lactonization to Fused Bicyclic Lactones**

Xinpei Cai, Weida Liang, Mingxin Liu, Xiating Li, and Mingji Dai\*

Department of Chemistry and Center for Cancer Research  
Purdue University, West Lafayette, IN 47907 (USA)

## Table of Contents

|                                                                                                                     |            |
|---------------------------------------------------------------------------------------------------------------------|------------|
| <b>Part 1. Experimental procedures and spectra data.....</b>                                                        | <b>S3</b>  |
| <b>Part 2. Single crystal x-ray structure data.....</b>                                                             | <b>S33</b> |
| <b>Part 3. <math>^1\text{H}</math>, <math>^{13}\text{C}</math>, and <math>^{19}\text{F}</math> NMR spectra.....</b> | <b>S37</b> |

## Part 1. Experimental procedures and spectra data.

**General Methods:** Reactions were performed using standard syringe techniques under argon unless stated otherwise. Starting materials and reagents were used as received from suppliers. Acetonitrile (CH<sub>3</sub>CN), dichloromethane (CH<sub>2</sub>Cl<sub>2</sub>), methanol (MeOH), tetrahydrofuran (THF), and toluene were purified by passing the previously degassed solvents through activated alumina columns. 1,2-Dichloroethane (DCE) was purified by distillation over calcium hydride. Benzoquinone was purified by recrystallization from hexanes. Flash chromatography was performed using silica gel (230-400 mesh). Thin layer chromatography (TLC) was performed using glass-backed silica plates (Silicycle). NMR spectra were recorded on a Bruker ARX-400 spectrometer or AV-500 spectrometer at room temperature. Chemical shifts (in ppm) are given in reference to the solvent signal [<sup>1</sup>H NMR: CDCl<sub>3</sub> (7.26); <sup>13</sup>C NMR: CDCl<sub>3</sub> (77.2)]. <sup>1</sup>H NMR data are reported as follows: chemical shifts (δ ppm), multiplicity (s = singlet, d = doublet, t = triplet, q = quartet, quin = quintuplet, m = multiplet, br = broad), coupling constant (Hz), and integration. <sup>13</sup>C NMR data are reported in terms of chemical shift and multiplicity. High-resolution mass measurements for compound characterization were carried out using a Waters SYNAPT G2-Si system with QuanTof analyzer or an Agilent 6550 QTOF system. IR data were recorded on a Thermo Nicolet Nexus 470 FTIR.

### General procedure for the synthesis of cyclopropanols:<sup>1</sup>

A solution of titanium(IV) isopropoxide (1.1 equiv.) and the allyl alcohol (1.0 equiv.) in toluene (0.5 M) was stirred at room temperature for 1 h, then at 40 °C using an oil bath for 10 min. After volatile components were removed under vacuum, THF (0.1 M) and the corresponding ester (1.0 equiv.) were added at room temperature, followed by a solution of cyclopentylmagnesium chloride (2 M, 4.4 equiv.) in tetrahydrofuran, over a period of 1 h (with a syringe pump). The reaction mixture was then stirred for an additional 30 min before it was quenched by addition of water (1 ml/1 mmol alcohol). The resulting mixture was stirred for 1 h, dried over anhydrous sodium sulfate, and filtered. The filter cake was washed with CH<sub>2</sub>Cl<sub>2</sub>. The combined filtrates were concentrated under reduced pressure. The resulting residue was purified by flash chromatography.

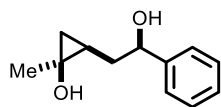

**15a:** 692 mg; 72%; pale yellow oil; purified by column chromatography (hexane/Et<sub>2</sub>O = 2/1). <sup>1</sup>H NMR (500 MHz, CDCl<sub>3</sub>) δ 7.40 – 7.34 (m, 4H), 7.28 – 7.25 (m, 1H), 4.91 (dd, *J* = 5.2, 4.1 Hz, 1H), 2.92 (s, 2H), 2.25 – 2.22 (m, 1H), 1.87 – 1.81 (m, 1H), 1.30 (s, 3H), 0.56 – 0.52 (m, 1H), 0.42 – 0.38 (m, 2H). <sup>13</sup>C NMR (125 MHz, CDCl<sub>3</sub>) δ 144.2, 128.3, 127.4, 125.9, 73.6, 54.5, 37.5, 25.8, 20.3, 20.0. **IR** (neat, cm<sup>-1</sup>): ν = 3308,

2952, 2916, 1451, 1377, 1270, 1045, 758, 699. **HRMS** (ESI):  $m/z$  175.1117 calc. for  $C_{12}H_{15}O^+$   $[M+H-H_2O]^+$ , found 175.1119.

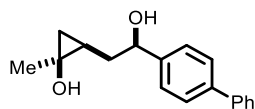

**15b**: 130 mg; 27% yield; white solid; purified by column chromatography (hexane/Et<sub>2</sub>O = 2/1). **<sup>1</sup>H NMR** (500 MHz, CDCl<sub>3</sub>)  $\delta$  7.67 – 7.55 (m, 4H), 7.47 – 7.40 (m, 4H), 7.39 – 7.31 (m, 1H), 5.00 (t,  $J$  = 4.6 Hz, 1H), 2.28 (dt,  $J$  = 14.6, 4.1 Hz, 1H), 1.92 (ddd,  $J$  = 14.5, 10.0, 5.4 Hz, 1H), 1.36 (s, 3H), 0.59 (dd,  $J$  = 9.0, 4.7 Hz, 1H), 0.54 – 0.39 (m, 2H). **<sup>13</sup>C NMR** (125 MHz, CDCl<sub>3</sub>)  $\delta$  143.1, 140.8, 140.2, 128.8, 127.3, 127.1, 127.0, 126.2, 73.4, 54.5, 37.3, 25.7, 20.2, 20.0. **IR** (neat, cm<sup>-1</sup>):  $\nu$  = 3316, 3028, 2953, 2916, 1601, 1488, 1446, 1406, 1376, 1269, 1049, 1008, 971, 842, 765, 737, 697. **HRMS** (ESI):  $m/z$  291.1356 calc. for  $C_{18}H_{20}NaO_2^+$   $[M+Na]^+$ , found 291.1355.

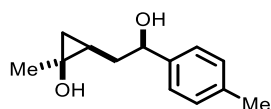

**15c**: 150 mg; 39%; colorless liquid; purified by column chromatography (hexane/Et<sub>2</sub>O = 2/1). **<sup>1</sup>H NMR** (500 MHz, CDCl<sub>3</sub>)  $\delta$  7.25 (d,  $J$  = 8.0 Hz, 2H), 7.18 – 7.13 (m, 2H), 4.90 – 4.81 (m, 1H), 3.08 (s, 2H), 2.35 (s, 3H), 2.20 (dt,  $J$  = 14.4, 4.0 Hz, 1H), 1.86 – 1.78 (m, 1H), 1.30 (s, 3H), 0.53 (q,  $J$  = 4.3 Hz, 1H), 0.46 – 0.35 (m, 2H). **<sup>13</sup>C NMR** (125 MHz, CDCl<sub>3</sub>)  $\delta$  141.0, 136.9, 128.9, 125.7, 73.4, 54.3, 37.4, 25.7, 21.1, 20.3, 19.8. **IR** (neat, cm<sup>-1</sup>):  $\nu$  = 3358, 2922, 1717, 1445, 1409, 1376, 1270, 1179, 1047, 1020, 972, 815. **HRMS** (ESI):  $m/z$  189.1274 calc. for  $C_{13}H_{17}O^+$   $[M+H-H_2O]^+$ , found 189.1275.

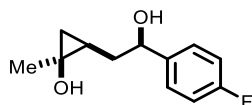

**15d**: 240 mg; 51%; colorless liquid; purified by column chromatography (hexane/Et<sub>2</sub>O = 2/1). **<sup>1</sup>H NMR** (500 MHz, CDCl<sub>3</sub>)  $\delta$  7.34 – 7.26 (m, 2H), 7.06 – 6.88 (m, 2H), 4.87 (t,  $J$  = 4.5 Hz, 1H), 3.80 – 3.68 (m, 1H), 3.68 – 3.53 (m, 1H), 2.16 (dt,  $J$  = 14.4, 4.1 Hz, 1H), 1.80 (ddd,  $J$  = 14.6, 9.9, 5.0 Hz, 1H), 1.30 (s, 3H), 0.53 (dd,  $J$  = 9.1, 4.9 Hz, 1H), 0.43 – 0.24 (m, 2H). **<sup>13</sup>C NMR** (125 MHz, CDCl<sub>3</sub>)  $\delta$  161.9 (d,  $J$  = 274 Hz), 139.8 (d,  $J$  = 3 Hz), 127.2 (d,  $J$  = 9 Hz), 114.9 (d,  $J$  = 21 Hz), 72.5, 54.3, 37.4, 25.6, 20.0, 19.9. **<sup>19</sup>F NMR** (471 MHz, CDCl<sub>3</sub>)  $\delta$  -116.8. **IR** (neat, cm<sup>-1</sup>):  $\nu$  = 3330, 2951, 2868, 1603, 1508, 1270, 1220, 1156, 1049, 1014, 835. **HRMS** (ESI):  $m/z$  193.1023 calc. for  $C_{12}H_{14}FO^+$   $[M+H-H_2O]^+$ , found 193.1025.

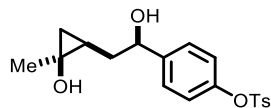

**15e:** 430 mg; 29%; colorless solid; purified by column chromatography (hexane/Et<sub>2</sub>O = 2/1). **<sup>1</sup>H NMR** (500 MHz, CDCl<sub>3</sub>) δ 7.73 – 7.54 (m, 2H), 7.34 – 7.23 (m, 4H), 7.02 – 6.91 (m, 2H), 4.89 (t, *J* = 4.5 Hz, 1H), 3.25 (s, 1H), 2.94 (s, 1H), 2.44 (s, 3H), 2.17 (dt, *J* = 14.6, 4.2 Hz, 1H), 1.81 (ddd, *J* = 14.9, 10.3, 5.0 Hz, 1H), 1.29 (s, 3H), 0.55 (dd, *J* = 9.3, 5.2 Hz, 1H), 0.38 (t, *J* = 5.8 Hz, 1H), 0.35 – 0.24 (m, 1H). **<sup>13</sup>C NMR** (125 MHz, CDCl<sub>3</sub>) δ 148.5, 145.4, 143.2, 132.4, 129.8, 128.5, 126.9, 122.1, 72.6, 54.4, 37.3, 25.6, 21.7, 20.0, 19.9. **IR** (neat, cm<sup>-1</sup>): ν = 3324, 2922, 1597, 1500, 1370, 1197, 1174, 1152, 1093, 865, 815, 663, 552. **HRMS** (ESI): *m/z* 385.1080 calc. for C<sub>19</sub>H<sub>22</sub>NaO<sub>5</sub>S<sup>+</sup> [M+Na]<sup>+</sup>, found 385.1080.

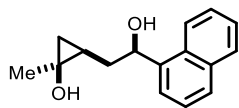

**15f:** 480 mg; 31%; white solid; purified by column chromatography (hexane/Et<sub>2</sub>O = 2/1). **<sup>1</sup>H NMR** (500 MHz, CDCl<sub>3</sub>) δ 8.05 (d, *J* = 8.1 Hz, 1H), 7.89 (dd, *J* = 7.6, 2.1 Hz, 1H), 7.77 (dd, *J* = 20.1, 7.6 Hz, 2H), 7.51 (ddd, *J* = 9.7, 5.4, 2.9 Hz, 3H), 5.77 (t, *J* = 4.5 Hz, 1H), 3.00 (s, 1H), 2.77 (s, 1H), 2.49 (dt, *J* = 14.5, 4.1 Hz, 1H), 2.04 (ddd, *J* = 14.9, 10.5, 4.8 Hz, 1H), 1.32 (s, 3H), 0.52 (dd, *J* = 9.4, 5.1 Hz, 1H), 0.42 (t, *J* = 5.7 Hz, 1H), 0.35 (dd, *J* = 9.7, 6.2 Hz, 1H). **<sup>13</sup>C NMR** (125 MHz, CDCl<sub>3</sub>) δ 139.4, 133.7, 130.0, 129.0, 127.8, 126.0, 125.6, 125.2, 123.2, 122.9, 70.1, 54.5, 36.0, 25.7, 20.5, 20.1. **IR** (neat, cm<sup>-1</sup>): ν = 3297, 2952, 2923, 1444, 1376, 1263, 1052, 1017, 963, 791, 776. **HRMS** (ESI): *m/z* 265.1199 calc. for C<sub>16</sub>H<sub>18</sub>NaO<sub>2</sub><sup>+</sup> [M+Na]<sup>+</sup>, found 265.1202.

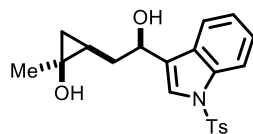

**15g:** 410 mg; 40%; white solid; purified by column chromatography (hexane/Et<sub>2</sub>O = 2/1). **<sup>1</sup>H NMR** (500 MHz, CDCl<sub>3</sub>) δ 8.01 (d, *J* = 8.3 Hz, 1H), 7.76 (d, *J* = 8.4 Hz, 2H), 7.61 – 7.51 (m, 2H), 7.36 – 7.29 (m, 1H), 7.27 – 7.15 (m, 3H), 5.18 (t, *J* = 4.3 Hz, 1H), 2.88 (s, 2H), 2.42 – 2.27 (m, 4H), 2.01 – 1.92 (m, 1H), 1.34 (s, 3H), 0.55 (dd, *J* = 9.2, 5.1 Hz, 1H), 0.47 – 0.33 (m, 2H). **<sup>13</sup>C NMR** (125 MHz, CDCl<sub>3</sub>) δ 145.1, 135.8, 135.4, 130.0, 128.7, 127.0, 126.1, 125.0, 123.3, 123.1, 120.1, 114.0, 67.8, 54.7, 35.3, 25.9, 21.7, 20.4, 20.2. **IR** (neat, cm<sup>-1</sup>): ν = 3320, 2968, 2922, 1447, 1367, 1271, 1173, 1121, 748, 665, 591, 572. **HRMS** (ESI): *m/z* 408.1240 calc. for C<sub>21</sub>H<sub>23</sub>NO<sub>4</sub>SN<sup>+</sup> [M+Na]<sup>+</sup>, found 408.1240.

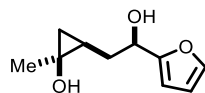

**15h**: 313 mg; 31%; colorless oil; purified by column chromatography (hexane/Et<sub>2</sub>O = 2/1). **<sup>1</sup>H NMR** (500 MHz, CDCl<sub>3</sub>) δ 7.38 (dd, *J* = 1.8, 0.9 Hz, 1H), 6.35 (dd, *J* = 3.2, 1.8 Hz, 1H), 6.28 (dt, *J* = 3.3, 0.8 Hz, 1H), 4.88 (ddd, *J* = 5.3, 4.4, 0.8 Hz, 1H), 2.79 (s, 2H), 2.29 (dt, *J* = 14.3, 4.4 Hz, 1H), 1.98 – 1.79 (m, 1H), 1.33 (d, *J* = 0.7 Hz, 3H), 0.73 – 0.53 (m, 2H), 0.44 (ddd, *J* = 5.4, 4.5, 0.8 Hz, 1H). **<sup>13</sup>C NMR** (125 MHz, CDCl<sub>3</sub>) δ 156.8, 141.8, 110.4, 106.0, 68.0, 54.7, 34.4, 25.8, 20.7, 20.1. **IR** (neat, cm<sup>-1</sup>): ν = 3319, 2955, 2923, 1445, 1376, 1266, 1149, 1055, 1008, 738. **HRMS** (ESI): *m/z* 205.0835 calc. for C<sub>10</sub>H<sub>14</sub>O<sub>3</sub>Na<sup>+</sup> [M+Na]<sup>+</sup>, found 205.0836.

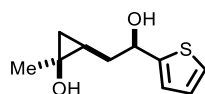

**15i**: 345 mg; 40%; colorless oil; purified by column chromatography (hexane/Et<sub>2</sub>O = 2/1). **<sup>1</sup>H NMR** (500 MHz, CDCl<sub>3</sub>) δ 7.23 (dd, *J* = 4.8, 1.4 Hz, 1H), 7.00 – 6.98 (m, 2H), 5.17 (t, *J* = 4.4 Hz, 1H), 3.01 (s, 2H), 2.29 – 2.24 (m, 1H), 1.95 – 1.89 (m, 1H), 1.36 (s, 3H), 0.63 – 0.60 (m, 2H), 0.46 – 0.44 (m, 1H). **<sup>13</sup>C NMR** (125 MHz, CDCl<sub>3</sub>) δ 148.5, 126.8, 124.2, 123.3, 70.3, 54.7, 37.8, 25.8, 20.4, 20.1. **IR** (neat, cm<sup>-1</sup>): ν = 3307, 2954, 2916, 1444, 1376, 1266, 1034, 963, 697. **HRMS** (ESI): *m/z* 181.0682 calc. for C<sub>10</sub>H<sub>13</sub>OS<sup>+</sup> [M+H]<sup>+</sup>, found 181.0679.

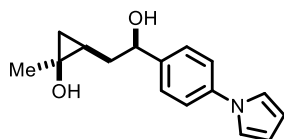

**15j**: 236 mg; 34%; white solid; purified by column chromatography (hexane/Et<sub>2</sub>O = 2/1). **<sup>1</sup>H NMR** (500 MHz, CDCl<sub>3</sub>) δ 7.46 – 7.35 (m, 4H), 7.09 (t, *J* = 2.2 Hz, 2H), 6.35 (t, *J* = 2.2 Hz, 2H), 4.96 (t, *J* = 4.5 Hz, 1H), 3.14 (s, 2H), 2.24 (dt, *J* = 14.6, 4.1 Hz, 1H), 1.89 (ddd, *J* = 14.6, 9.8, 5.1 Hz, 1H), 1.35 (s, 3H), 0.63 – 0.53 (m, 1H), 0.47 – 0.38 (m, 2H). **<sup>13</sup>C NMR** (125 MHz, CDCl<sub>3</sub>) δ 141.5, 139.8, 126.9, 120.2, 119.3, 110.4, 72.9, 54.4, 37.3, 25.7, 20.1. **IR** (neat, cm<sup>-1</sup>): ν = 3305, 2916, 1521, 1327, 1270, 1070, 1049, 1019, 723. **HRMS** (ESI): *m/z* 258.1489 calc. for C<sub>16</sub>H<sub>20</sub>NO<sub>2</sub><sup>+</sup> [M+H]<sup>+</sup>, found 258.1490.

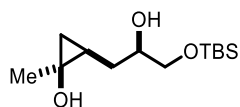

**15k**: 98 mg; 28%; colorless liquid; purified by column chromatography (hexane/Et<sub>2</sub>O = 2/1). **<sup>1</sup>H NMR** (500 MHz, CDCl<sub>3</sub>) δ 3.79 – 3.74 (m, 1H), 3.68 – 3.59 (m, 2H), 2.84 (s, 1H), 1.94 (dt, *J* = 14.7, 4.1 Hz, 1H), 1.60

– 1.55 (m, 1H), 1.36 (d,  $J = 0.7$  Hz, 3H), 0.89 (s, 9H), 0.59 (dd,  $J = 4.0, 2.2$  Hz, 2H), 0.39 (dt,  $J = 4.2, 2.5$  Hz, 1H), 0.08 (d,  $J = 2.1$  Hz, 6H).  $^{13}\text{C}$  NMR (125 MHz,  $\text{CDCl}_3$ )  $\delta$  71.5, 66.1, 54.0, 31.0, 25.9 (2C), 20.5, 20.3, 18.3, -5.3, -5.4. **IR** (neat,  $\text{cm}^{-1}$ ):  $\nu = 3320, 2929, 2162, 2021, 2001, 1978, 1955, 837, 549, 469$ . **HRMS** (ESI):  $m/z$  243.1775 calc. for  $\text{C}_{13}\text{H}_{27}\text{O}_2\text{Si}^+ [\text{M}+\text{H}-\text{H}_2\text{O}]^+$ , found 243.1774.

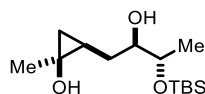

**15l**: 224 mg; 21%; colorless oil; purified by column chromatography (hexane/ $\text{Et}_2\text{O} = 2/1$ ).  $^1\text{H}$  NMR (500 MHz,  $\text{CDCl}_3$ )  $\delta$  3.86 – 3.82 (m, 1H), 3.61 – 3.58 (m, 1H), 1.86 (ddd,  $J = 14.6, 6.4, 5.1$  Hz, 1H), 1.55 (ddd,  $J = 14.4, 9.1, 4.8$  Hz, 1H), 1.41 (s, 3H), 1.15 (d,  $J = 6.3$  Hz, 3H), 0.89 (s, 9H), 0.76 (tdd,  $J = 9.2, 6.2, 5.1$  Hz, 1H), 0.62 (dd,  $J = 9.3, 5.3$  Hz, 1H), 0.41 (t,  $J = 5.8$  Hz, 1H), 0.08 (s, 3H), 0.08 (s, 3H).  $^{13}\text{C}$  NMR (125 MHz,  $\text{CDCl}_3$ )  $\delta$  75.4, 71.1, 54.8, 30.4, 26.1, 26.0, 21.3, 19.9, 18.2, -4.2, -4.7. **IR** (neat,  $\text{cm}^{-1}$ ):  $\nu = 3318, 2955, 2929, 2858, 1463, 1374, 1256, 1086, 967, 834, 775$ . **HRMS** (ESI):  $m/z$  297.1856 calc. for  $\text{C}_{14}\text{H}_{30}\text{O}_3\text{NaSi}^+ [\text{M}+\text{Na}]^+$ , found 297.1857.

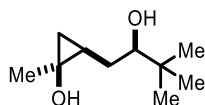

**15m**: 208 mg; 23%; white solid; purified by column chromatography (hexane/ $\text{Et}_2\text{O} = 2/1$ ).  $^1\text{H}$  NMR (500 MHz,  $\text{CDCl}_3$ )  $\delta$  3.36 (dd,  $J = 9.1, 2.6$  Hz, 1H), 2.09 (s, 1H), 1.83 (s, 1H), 1.74 (ddd,  $J = 14.6, 8.1, 2.6$  Hz, 1H), 1.62 (dd,  $J = 9.0, 5.7$  Hz, 1H), 1.43 (d,  $J = 0.7$  Hz, 3H), 0.93 (s, 9H), 0.85 – 0.77 (m, 1H), 0.66 (dd,  $J = 9.2, 5.2$  Hz, 1H), 0.44 (t,  $J = 5.7$  Hz, 1H).  $^{13}\text{C}$  NMR (125 MHz,  $\text{CDCl}_3$ )  $\delta$  80.2, 54.5, 35.1, 30.4, 26.0, 25.9, 22.5, 19.9. **IR** (neat,  $\text{cm}^{-1}$ ):  $\nu = 3340, 2954, 2869, 1363, 1259, 1238, 1091, 1075, 1028, 1018, 1007, 991, 957, 871$ . **HRMS** (ESI):  $m/z$  155.1430 calc. for  $\text{C}_{10}\text{H}_{19}\text{O}^+ [\text{M}+\text{H}-\text{H}_2\text{O}]^+$ , found 155.1432.

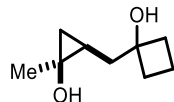

**15n**: 436 mg; 42%; colorless liquid; purified by column chromatography (hexane/ $\text{Et}_2\text{O} = 2/1$ ).  $^1\text{H}$  NMR (500 MHz,  $\text{CDCl}_3$ )  $\delta$  3.60 (s, 1H), 2.88 (s, 1H), 2.26 – 2.12 (m, 2H), 2.10 – 1.95 (m, 3H), 1.75 – 1.66 (m, 1H), 1.56 – 1.47 (m, 2H), 1.36 (d,  $J = 0.6$  Hz, 3H), 0.75 – 0.67 (m, 1H), 0.64 (dd,  $J = 9.2, 5.0$  Hz, 1H), 0.48 – 0.40 (m, 1H).  $^{13}\text{C}$  NMR (125 MHz,  $\text{CDCl}_3$ )  $\delta$  75.1, 54.2, 37.8, 37.6, 35.5, 25.9, 20.4, 20.1, 12.0. **IR** (neat,  $\text{cm}^{-1}$ ):  $\nu = 3346, 2933, 1371, 1272, 1244, 1165, 1111, 1020, 956$ . **HRMS** (ESI):  $m/z$  139.1117 calc. for  $\text{C}_9\text{H}_{15}\text{O}^+ [\text{M}+\text{H}-\text{H}_2\text{O}]^+$ , found 139.1118.

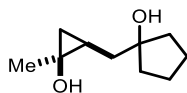

**15o**: 421 mg; 52%; colorless oil; purified by column chromatography (hexane/Et<sub>2</sub>O = 2/1). **<sup>1</sup>H NMR** (500 MHz, CDCl<sub>3</sub>) δ 2.70 (s, 2H), 1.92 (dd, *J* = 14.6, 4.3 Hz, 1H), 1.82 – 1.76 (m, 2H), 1.73 – 1.55 (m, 7H), 1.39 (s, 3H), 0.76 – 0.71 (m, 1H), 0.64 (dd, *J* = 9.2, 5.1 Hz, 1H), 0.41 (t, *J* = 5.6 Hz, 1H). **<sup>13</sup>C NMR** (125 MHz, CDCl<sub>3</sub>) δ 83.0, 54.3, 41.2, 40.0, 38.8, 26.2, 23.8, 23.6, 21.7, 20.6. **IR** (neat, cm<sup>-1</sup>): ν = 3319, 2956, 2873, 1445, 1375, 1272, 1016, 958. **HRMS** (ESI): *m/z* 153.1274 calc. for C<sub>10</sub>H<sub>17</sub>O<sup>+</sup> [M+H-H<sub>2</sub>O]<sup>+</sup>, found 153.1273.

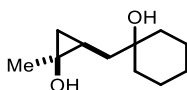

**15p**: 309 mg; 26%; colorless liquid; purified by column chromatography (hexane/Et<sub>2</sub>O = 2/1). **<sup>1</sup>H NMR** (500 MHz, CDCl<sub>3</sub>) δ 4.24 (s, 1H), 2.60 (s, 1H), 1.99 (dd, *J* = 14.8, 4.4 Hz, 1H), 1.65 – 1.57 (m, 1H), 1.57 – 1.38 (m, 8H), 1.38 – 1.24 (m, 5H), 0.68 (dddd, *J* = 10.6, 9.2, 6.1, 4.4 Hz, 1H), 0.59 (dd, *J* = 9.3, 5.0 Hz, 1H), 0.37 (t, *J* = 5.5 Hz, 1H). **<sup>13</sup>C NMR** (125 MHz, CDCl<sub>3</sub>) δ 72.0, 54.0, 40.3, 39.4, 36.1, 26.0, 25.8, 22.7, 22.3, 20.6, 20.0. **IR** (neat, cm<sup>-1</sup>): ν = 3342, 2928, 2858, 1447, 1375, 1273, 1162, 1047, 966. **HRMS** (ESI): *m/z* 207.1356 calc. for C<sub>11</sub>H<sub>20</sub>NaO<sub>2</sub><sup>+</sup> [M+Na]<sup>+</sup>, found 207.1357.

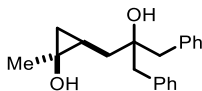

**15q**: 124 mg; 14%; white solid; purified by column chromatography (hexane/Et<sub>2</sub>O = 2/1). **<sup>1</sup>H NMR** (500 MHz, CDCl<sub>3</sub>) δ 7.39 – 7.10 (m, 10H), 3.03 (d, *J* = 13.6 Hz, 1H), 2.87 (d, *J* = 13.5 Hz, 1H), 2.74 (q, *J* = 13.7 Hz, 2H), 1.95 (dd, *J* = 14.8, 4.3 Hz, 1H), 1.43 (dd, *J* = 14.9, 10.5 Hz, 1H), 1.39 (d, *J* = 0.6 Hz, 3H), 0.77 (dddd, *J* = 10.5, 9.2, 6.1, 4.3 Hz, 1H), 0.63 (dd, *J* = 9.2, 5.1 Hz, 1H), 0.33 (t, *J* = 5.7 Hz, 1H). **<sup>13</sup>C NMR** (125 MHz, CDCl<sub>3</sub>) δ 137.4, 137.1, 130.7, 128.4, 128.1, 126.7, 126.5, 74.5, 54.3, 46.7, 45.4, 38.1, 26.0, 20.6, 20.5. **IR** (neat, cm<sup>-1</sup>): ν = 3466, 3028, 2924, 1495, 1454, 1243, 1031, 753, 701. **HRMS** (ESI): *m/z* 319.1669 calc. for C<sub>20</sub>H<sub>24</sub>NaO<sub>2</sub><sup>+</sup> [M+Na]<sup>+</sup>, found 319.1669.

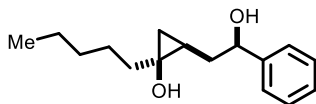

**15r**: 494 mg; 59%; colorless oil; purified by column chromatography (hexane/Et<sub>2</sub>O = 2/1). **<sup>1</sup>H NMR** (500 MHz, CDCl<sub>3</sub>) δ 7.40 – 7.34 (m, 4H), 7.28 – 7.25 (m, 1H), 4.92 (t, *J* = 4.7 Hz, 1H), 2.80 (s, 2H), 2.23 (dt, *J* = 14.5, 4.3 Hz, 1H), 1.89 (ddd, *J* = 14.5, 10.0, 5.3 Hz, 1H), 1.56 – 1.49 (m, 1H), 1.48 – 1.40 (m, 2H), 1.36 – 1.23 (m, 5H), 0.89 (t, *J* = 7.0 Hz, 3H), 0.55 (dd, *J* = 9.2, 5.0 Hz, 1H), 0.49 – 0.42 (m, 1H), 0.37 (t, *J* = 5.5

Hz, 1H). **<sup>13</sup>C NMR** (125 MHz, CDCl<sub>3</sub>) δ 144.2, 128.4, 127.3, 125.9, 73.6, 58.2, 39.5, 37.3, 32.1, 25.4, 22.8, 19.4, 19.1, 14.2. **IR** (neat, cm<sup>-1</sup>): ν = 3318, 2954, 2929, 1452, 1249, 1044, 700. **HRMS** (ESI): *m/z* 271.1669 calc. for C<sub>16</sub>H<sub>24</sub>O<sub>2</sub>Na<sup>+</sup> [M+Na]<sup>+</sup>, found 271.1670.

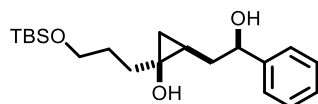

**15s**: 614 mg; 35%; colorless oil; purified by column chromatography (hexane/Et<sub>2</sub>O = 2/1). **<sup>1</sup>H NMR** (500 MHz, CDCl<sub>3</sub>) δ 7.43 – 7.31 (m, 4H), 7.26 – 7.21 (m, 1H), 4.92 (t, *J* = 4.6 Hz, 1H), 3.79 – 3.63 (m, 2H), 2.22 (dt, *J* = 14.6, 4.6 Hz, 1H), 2.02 – 1.88 (m, 1H), 1.84 – 1.76 (m, 1H), 1.76 – 1.69 (m, 2H), 1.39 – 1.31 (m, 1H), 0.91 (s, 9H), 0.55 (dd, *J* = 9.2, 4.9 Hz, 1H), 0.47 – 0.40 (m, 1H), 0.41 – 0.32 (m, 1H), 0.09 (s, 6H). **<sup>13</sup>C NMR** (125 MHz, CDCl<sub>3</sub>) δ 144.8, 128.2, 127.0, 125.9, 73.4, 64.0, 57.8, 37.5, 37.4, 29.7, 26.1, 19.7, 19.0, 18.5, -5.2, -5.3. **IR** (neat, cm<sup>-1</sup>): ν = 3325, 2952, 2928, 2856, 1471, 1451, 1255, 1096, 1043, 1004, 835, 776, 80. **HRMS** (ESI): *m/z* 351.2350 calc. for C<sub>20</sub>H<sub>35</sub>O<sub>3</sub>Si<sup>+</sup> [M+H]<sup>+</sup>, found 351.2351.

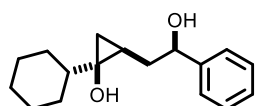

**15t**: 505 mg; 29%; colorless solid; purified by column chromatography (hexane/Et<sub>2</sub>O = 2/1). **<sup>1</sup>H NMR** (500 MHz, CDCl<sub>3</sub>) δ 7.43 – 7.31 (m, 4H), 7.29 – 7.23 (m, 1H), 4.91 (t, *J* = 4.9 Hz, 1H), 2.33 – 2.19 (m, 3H), 1.96 – 1.88 (m, 1H), 1.80 – 1.72 (m, 3H), 1.68 – 1.59 (m, 2H), 1.23 – 1.09 (m, 5H), 0.86 – 0.78 (m, 1H), 0.60 – 0.46 (m, 2H), 0.32 (d, *J* = 3.0 Hz, 1H). **<sup>13</sup>C NMR** (125 MHz, CDCl<sub>3</sub>) δ 144.3, 128.4, 127.3, 125.8, 73.6, 62.0, 46.2, 37.3, 28.8, 28.7, 26.6, 26.5, 18.7, 18.3. **IR** (neat, cm<sup>-1</sup>): ν = 3332, 2925, 2852, 1450, 1260, 1046, 755, 701. **HRMS** (ESI): *m/z* 283.1669 calc. for C<sub>17</sub>H<sub>24</sub>NaO<sub>2</sub><sup>+</sup> [M+Na]<sup>+</sup>, found 283.1668.

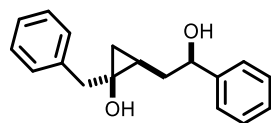

**15u**: 473 mg; 52%; colorless oil; purified by column chromatography (hexane/Et<sub>2</sub>O = 2/1). **<sup>1</sup>H NMR** (500 MHz, CDCl<sub>3</sub>) δ 7.38 – 7.22 (m, 10H), 4.87 (t, *J* = 4.8 Hz, 1H), 2.87 (d, *J* = 14.1 Hz, 1H), 2.76 (d, *J* = 14.0 Hz, 1H), 2.35 (s, 2H), 2.23 (dt, *J* = 14.6, 4.5 Hz, 1H), 1.90 (ddd, *J* = 14.8, 10.0, 5.1 Hz, 1H), 0.75 (dd, *J* = 9.4, 5.2 Hz, 1H), 0.68 – 0.61 (m, 1H), 0.46 (t, *J* = 5.3 Hz, 1H). **<sup>13</sup>C NMR** (125 MHz, CDCl<sub>3</sub>) δ 144.1, 138.7, 129.7, 128.5, 128.4, 127.4, 126.6, 125.8, 73.5, 58.5, 45.1, 37.2, 19.0, 18.9. **IR** (neat, cm<sup>-1</sup>): ν = 3346, 2923, 1495, 1453, 1046, 1030, 755, 701. **HRMS** (ESI): *m/z* 291.1356 calc. for C<sub>18</sub>H<sub>20</sub>O<sub>2</sub>Na<sup>+</sup> [M+Na]<sup>+</sup>, found 291.1355.

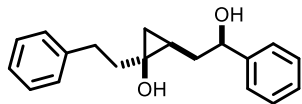

**15v**: 577 mg; 66%; colorless liquid; purified by column chromatography (hexane/Et<sub>2</sub>O = 2/1). **<sup>1</sup>H NMR** (500 MHz, CDCl<sub>3</sub>) δ 7.41 – 7.32 (m, 4H), 7.32 – 7.26 (m, 3H), 7.19 (d, *J* = 7.2 Hz, 3H), 4.95 (t, *J* = 4.7 Hz, 1H), 2.90 – 2.70 (m, 3H), 2.62 (d, *J* = 49.9 Hz, 1H), 2.27 – 2.15 (m, 1H), 1.94 – 1.80 (m, 2H), 1.65 – 1.61 (m, 1H), 0.58 (dd, *J* = 9.2, 5.0 Hz, 1H), 0.53 – 0.43 (m, 1H), 0.42 (ddd, *J* = 6.2, 4.9, 1.4 Hz, 1H). **<sup>13</sup>C NMR** (125 MHz, CDCl<sub>3</sub>) δ 143.9, 142.6, 128.4, 128.4, 128.3, 127.3, 125.7, 125.7, 73.5, 57.8, 41.8, 37.1, 32.2, 19.6, 19.1. **IR** (neat, cm<sup>-1</sup>): ν = 3338, 3026, 2917, 1712, 1495, 1248, 1044, 749, 698. **HRMS** (ESI): *m/z* 305.1512 calc. for C<sub>19</sub>H<sub>22</sub>NaO<sub>2</sub><sup>+</sup> [M+Na]<sup>+</sup>, found 305.1511.

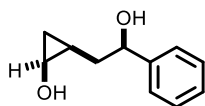

**15w**: 98 mg; 20%; colorless liquid; purified by column chromatography (hexane/Et<sub>2</sub>O = 2/1). **<sup>1</sup>H NMR** (500 MHz, CDCl<sub>3</sub>) δ 7.40 (d, *J* = 7.5 Hz, 2H), 7.36 (t, *J* = 7.6 Hz, 2H), 7.30 – 7.25 (m, 1H), 4.95 (t, *J* = 4.8 Hz, 1H), 3.39 (td, *J* = 6.5, 3.2 Hz, 1H), 2.96 (s, 2H), 2.23 (dt, *J* = 14.4, 4.4 Hz, 1H), 1.87 (ddd, *J* = 14.9, 10.2, 5.1 Hz, 1H), 0.65 (dt, *J* = 9.4, 5.9 Hz, 1H), 0.55 – 0.45 (m, 1H), 0.27 (td, *J* = 6.1, 3.2 Hz, 1H). **<sup>13</sup>C NMR** (125 MHz, CDCl<sub>3</sub>) δ 143.9, 128.3, 127.4, 125.7, 73.7, 49.1, 36.0, 13.5, 13.2. **IR** (neat, cm<sup>-1</sup>): ν = 3317, 3027, 2920, 1452, 1324, 1215, 1040, 755, 701. **HRMS** (ESI): *m/z* 177.0910 calc. for C<sub>11</sub>H<sub>13</sub>O<sub>2</sub><sup>+</sup> [M-H]<sup>+</sup>, found 177.0890.

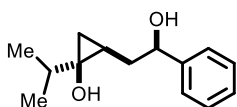

**15x**: 671 mg; 45%; colorless solid; purified by column chromatography (hexane/Et<sub>2</sub>O = 2/1). **<sup>1</sup>H NMR** (500 MHz, CDCl<sub>3</sub>) δ 7.41 (d, *J* = 7.2 Hz, 2H), 7.36 (dd, *J* = 8.4, 6.7 Hz, 2H), 7.30 – 7.23 (m, 1H), 4.93 (t, *J* = 4.8 Hz, 1H), 2.25 (dt, *J* = 14.6, 4.2 Hz, 1H), 2.01 – 1.86 (m, 1H), 1.17 (p, *J* = 6.8 Hz, 1H), 0.98 (d, *J* = 6.8 Hz, 3H), 0.95 (d, *J* = 6.8 Hz, 3H), 0.65 – 0.48 (m, 2H), 0.35 (s, 1H). **<sup>13</sup>C NMR** (125 MHz, CDCl<sub>3</sub>) δ 144.2, 128.4, 127.3, 125.8, 73.5, 62.4, 37.3, 36.2, 19.2, 18.6, 18.4, 18.3. **IR** (neat, cm<sup>-1</sup>): ν = 3331, 2961, 2872, 1451, 1269, 1045, 993, 702. **HRMS** (ESI): *m/z* 203.1430 calc. for C<sub>14</sub>H<sub>19</sub>O<sup>+</sup> [M+H-H<sub>2</sub>O]<sup>+</sup>, found 203.1431. (Note: **15x** and **15y** were produced from the same reaction.)

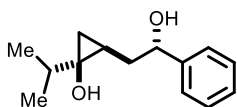

**15y**: 290 mg; 20%; colorless solid; purified by column chromatography (hexane/Et<sub>2</sub>O = 2/1). **<sup>1</sup>H NMR** (500 MHz, CDCl<sub>3</sub>) δ 7.38 – 7.31 (m, 4H), 7.30 – 7.26 (m, 1H), 4.78 (dd, *J* = 10.5, 2.3 Hz, 1H), 2.17 (ddd, *J* = 14.9, 4.2, 2.3 Hz, 1H), 1.69 (dt, *J* = 14.9, 10.5 Hz, 1H), 1.25 (s, 1H), 1.19 (h, *J* = 7.0 Hz, 1H), 1.06 (d, *J* = 6.8 Hz, 3H), 1.03 (d, *J* = 6.9 Hz, 3H), 0.84 (tdd, *J* = 10.1, 6.0, 4.1 Hz, 1H), 0.63 (dd, *J* = 9.3, 5.3 Hz, 1H), 0.40 (t, *J* = 5.7 Hz, 1H). **<sup>13</sup>C NMR** (125 MHz, CDCl<sub>3</sub>) δ 145.2, 128.7, 127.7, 125.7, 75.5, 62.0, 39.0, 36.8, 22.9, 19.4, 18.3, 18.2. **IR** (neat, cm<sup>-1</sup>): ν = 3338, 2962, 2930, 1970, 1451, 1270, 1061, 1003, 754, 700. **HRMS** (ESI): *m/z* 203.1430 calc. for C<sub>14</sub>H<sub>19</sub>O<sup>+</sup> [M+H-H<sub>2</sub>O]<sup>+</sup>, found 203.1432.

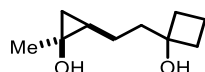

**15za**: 314 mg; 58%; white solid; purified by column chromatography (hexane/Et<sub>2</sub>O = 2/1). **<sup>1</sup>H NMR** (500 MHz, CDCl<sub>3</sub>) δ 2.08 – 1.95 (m, 5H), 1.74 – 1.65 (m, 4H), 1.52 (dt, *J* = 11.3, 8.8 Hz, 1H), 1.43 (m, 4H), 1.28 – 1.21 (m, 1H), 1.05 – 0.95 (m, 1H), 0.85 (dd, *J* = 10.0, 5.2 Hz, 1H), 0.09 (dd, *J* = 6.4, 5.2 Hz, 1H). **<sup>13</sup>C NMR** (125 MHz, CDCl<sub>3</sub>) δ 75.2, 55.7, 39.3, 36.1, 36.0, 25.7, 24.0, 20.5, 20.3, 12.1. **IR** (neat, cm<sup>-1</sup>): ν = 3316, 2979, 2931, 1443, 1376, 1258, 1224, 1167, 1075, 1022, 955, 637. **HRMS** (ESI): *m/z* 153.1274 calc. for C<sub>10</sub>H<sub>17</sub>O<sup>+</sup> [M+H-H<sub>2</sub>O]<sup>+</sup>, found 153.1274.

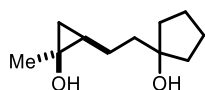

**15zb**: 327 mg; 53%; colorless oil; purified by column chromatography (hexane/Et<sub>2</sub>O = 2/1). **<sup>1</sup>H NMR** (500 MHz, CDCl<sub>3</sub>) δ 1.90 – 1.75 (m, 2H), 1.73 – 1.65 (m, 2H), 1.65 – 1.55 (m, 5H), 1.58 – 1.51 (m, 1H), 1.49 – 1.41 (m, 4H), 1.34 – 1.21 (m, 1H), 1.07 – 0.95 (m, 1H), 0.84 (dd, *J* = 10.0, 5.2 Hz, 1H), 0.08 (dd, *J* = 6.4, 5.2 Hz, 1H). **<sup>13</sup>C NMR** (125 MHz, CDCl<sub>3</sub>) δ 82.6, 55.8, 41.5, 40.0, 39.8, 26.0, 25.4, 23.9, 23.9, 20.6, 20.4. **IR** (neat, cm<sup>-1</sup>): ν = 3346, 2955, 2869, 1440, 1375, 1230, 1213, 979. **HRMS** (ESI): *m/z* 207.1356 calc. for C<sub>11</sub>H<sub>20</sub>O<sub>2</sub>Na<sup>+</sup> [M+Na]<sup>+</sup>, found 207.1357.

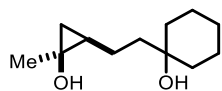

**15zc**: 187 mg; 30%; white solid; purified by column chromatography (hexane/Et<sub>2</sub>O = 2/1). **<sup>1</sup>H NMR** (500 MHz, CDCl<sub>3</sub>) δ 1.61 – 1.57 (m, 1H), 1.50 – 1.16 (m, 16H), 1.00 – 0.91 (m, 1H), 0.83 (dd, *J* = 10.1, 5.2 Hz, 1H), 0.06 (dd, *J* = 6.4, 5.1 Hz, 1H). **<sup>13</sup>C NMR** (125 MHz, CDCl<sub>3</sub>) δ 71.3, 55.6, 42.2, 37.6, 37.3, 25.9, 25.8, 23.4, 22.3, 20.5, 20.2. **IR** (neat, cm<sup>-1</sup>): ν = 3351, 2928, 2859, 1447, 1227, 1164, 967. **HRMS** (ESI): *m/z* 221.1512 calc. for C<sub>12</sub>H<sub>22</sub>NaO<sub>2</sub><sup>+</sup> [M+Na]<sup>+</sup>, found 221.1527.

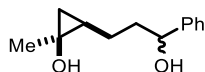

**15zd**: 612 mg as a 1:1 mixture of diastereomers; 45%; colorless liquid; purified by column chromatography (hexane/Et<sub>2</sub>O = 2/1). **<sup>1</sup>H NMR** (500 MHz, CDCl<sub>3</sub>) δ 7.38 – 7.26 (m, 5H), 4.70 (ddd, *J* = 12.1, 7.7, 5.7 Hz, 1H), 2.01 – 1.73 (m, 4H), 1.38 (d, *J* = 11.6 Hz, 3H), 1.34 – 1.13 (m, 2H), 0.99 (dt, *J* = 10.0, 6.7 Hz, 1H), 0.84 (ddd, *J* = 10.2, 5.2, 2.6 Hz, 1H), 0.07 (ddd, *J* = 8.2, 6.5, 5.1 Hz, 1H). **<sup>13</sup>C NMR** (125 MHz, CDCl<sub>3</sub>) δ 144.8, 144.7, 128.5, 127.6, 127.6, 125.9, 125.9, 74.4, 74.3, 55.7, 55.6, 38.9, 38.9, 26.2, 26.1, 25.4, 25.3, 20.5, 20.3, 20.2. **IR** (neat, cm<sup>-1</sup>): ν = 3342, 2930, 2861, 1453, 1378, 1220, 1064, 1027, 763, 701. **HRMS** (ESI): *m/z* 229.1199 calc. for C<sub>13</sub>H<sub>18</sub>NaO<sub>2</sub><sup>+</sup> [M+Na]<sup>+</sup>, found 229.1199.

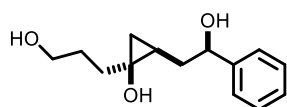

**17**: To a solution of **15s** (106 mg, 0.303 mmol, 1.0 equiv.) in THF at 0 °C was added 1.0 M TBAF (0.37 ml, 1.2 equiv.). The reaction was slowly warmed to room temperature. After 6 h, the reaction was quenched with water, extracted with EtOAc, washed with brine, dried with Na<sub>2</sub>SO<sub>4</sub>, then concentrate under reduced pressure. The residue was purified by flash column (hexane/EtOAc = 1/4 to pure EtOAc) to give triol **17** (65.0 mg, 91%) as colorless solid. **<sup>1</sup>H NMR** (500 MHz, CDCl<sub>3</sub>) δ 7.40 – 7.26 (m, 5H), 4.97 (t, *J* = 4.5 Hz, 1H), 3.77 – 3.65 (m, 2H), 3.03 (s, 3H), 2.24 (dt, *J* = 14.6, 4.2 Hz, 1H), 1.92 (dt, *J* = 9.5, 4.8 Hz, 1H), 1.80 – 1.73 (m, 3H), 1.45 – 1.36 (m, 1H), 0.58 (dd, *J* = 9.2, 4.9 Hz, 1H), 0.52 – 0.44 (m, 1H), 0.42 (ddd, *J* = 6.1, 4.9, 1.3 Hz, 1H). **<sup>13</sup>C NMR** (125 MHz, CDCl<sub>3</sub>) δ 144.1, 128.3, 127.2, 125.7, 73.4, 63.2, 57.8, 37.3, 37.0, 29.4, 19.7, 19.0. **IR** (neat, cm<sup>-1</sup>): ν = 3316, 2939, 1450, 1305, 1256, 1042, 1003, 755, 701. **HRMS** (ESI): *m/z* 259.1305 calc. for C<sub>14</sub>H<sub>20</sub>NaO<sub>3</sub><sup>+</sup> [M+Na]<sup>+</sup>, found 259.1306.

#### A representative procedure for the synthesis of bicyclic lactone.

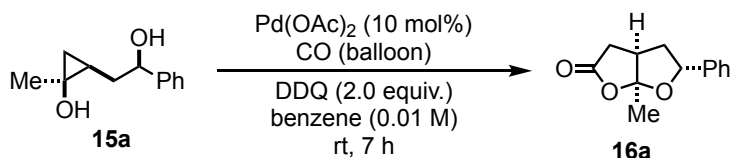

To a stirred solution of **15a** (38.4 mg, 0.2 mmol, 1.0 equiv.) and DDQ (90.8 mg, 0.4 mmol, 2.0 equiv.) in benzene (20 ml) under carbon monoxide (the reactor was evacuated and backfilled three times using a carbon monoxide balloon) was added Pd(OAc)<sub>2</sub> (4.5 mg, 0.02 mmol, 0.1 equiv.) in one portion. The resulting solution was stirred at room temperature for 7 h. The reaction mixture was quenched with water. The aqueous layer was extracted with ethyl acetate three times. The combined organic layers were washed

with brine, dried over Na<sub>2</sub>SO<sub>4</sub>, and concentrated under reduced pressure. The resulting residue was purified by flash chromatography (hexane/ethyl acetate = 2/1) to obtain **16a** (32.3 mg, 74%) as colorless solid. <sup>1</sup>H NMR (500 MHz, CDCl<sub>3</sub>) δ 7.39 – 7.29 (m, 5H), 5.16 (dd, *J* = 10.4, 5.6 Hz, 1H), 3.06 – 2.98 (m, 1H), 2.99 (t, *J* = 2.4 Hz, 1H), 2.66 – 2.57 (m, 1H), 2.25 – 2.10 (m, 2H), 1.78 (s, 3H). <sup>13</sup>C NMR (125 MHz, CDCl<sub>3</sub>) δ 174.8, 139.2, 128.6, 128.2, 126.0, 117.2, 80.3, 43.4, 41.9, 36.6, 24.4. IR (neat, cm<sup>-1</sup>): ν = 2987, 1771, 1256, 1130, 1091, 1007, 919, 760, 701. HRMS (ESI): *m/z* 219.1016 calc. for C<sub>13</sub>H<sub>15</sub>O<sub>3</sub><sup>+</sup> [M+H]<sup>+</sup>, found 219.1016

### Scale-up synthesis

To a stirred solution of **15a** (560 mg, 2.92 mmol, 1.0 equiv.) and DDQ (1.33 g, 5.83 mmol, 2.0 equiv.) in benzene (290 ml) under carbon monoxide (the reactor was evacuated and backfilled three times using a carbon monoxide balloon) was added Pd(OAc)<sub>2</sub> (65.6 mg, 0.292 mmol, 0.1 equiv.) in one portion. The resulting solution was stirred at room temperature for 7 h. The reaction mixture was quenched with water. The aqueous layer was extracted with ethyl acetate three times. The combined organic layers were washed with brine, dried over Na<sub>2</sub>SO<sub>4</sub>, and concentrated under reduced pressure. The resulting residue was purified by flash chromatography (hexane/ethyl acetate = 2/1) to obtain **16a** (414 mg, 65%) as colorless solid.

### Asymmetric synthesis

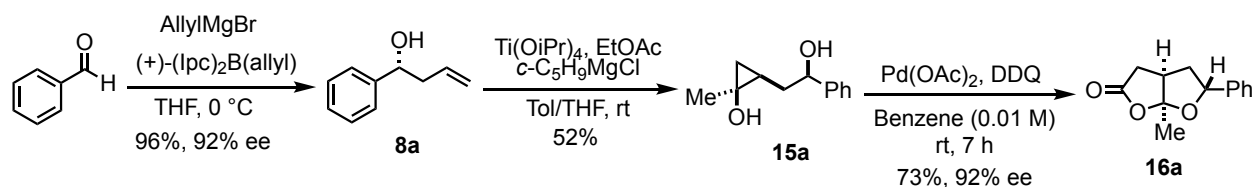

Enantioenriched homoallylic alcohol was prepared according to a reported literature procedure.<sup>2</sup> Following the above cyclopropanol synthesis and carbonylative lactonization procedures, compound **16a** was produced in 73% yield and 92% ee.

**8a**: SFC conditions: CEL-1, [97:3 to 50:50 CO<sub>2</sub>:(IPA/MeOH = 1:1)], 8 min, 1.5 mL/min

| Racemic <b>8a</b> Peak Results |        |                     |        |
|--------------------------------|--------|---------------------|--------|
|                                | RT/min | Area/( $\mu$ V*sec) | % Area |
| 1                              | 0.853  | 16718               | 50.46  |
| 2                              | 0.986  | 16413               | 49.54  |

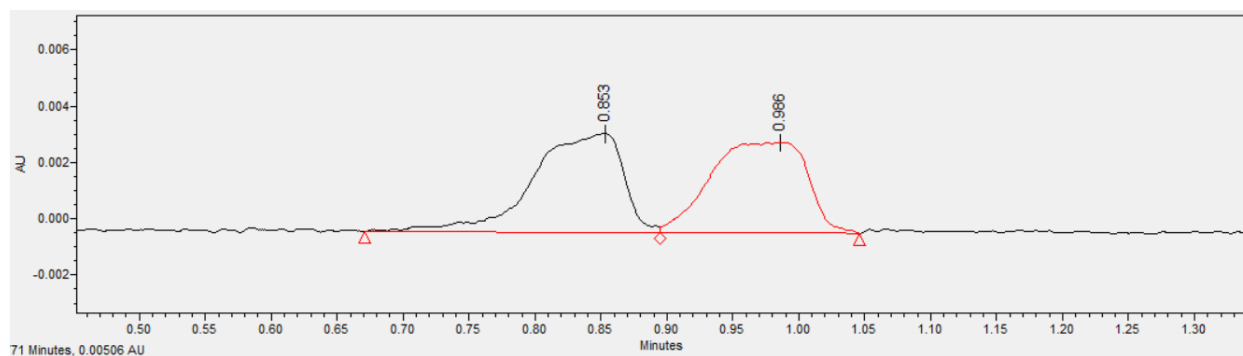

**Racemic 8a**

| Enantioenriched <b>8a</b> Peak Results |        |                     |        |
|----------------------------------------|--------|---------------------|--------|
|                                        | RT/min | Area/( $\mu$ V*sec) | % Area |
| 1                                      | 0.853  | 76259               | 96.06  |
| 2                                      | 0.994  | 3128                | 3.94   |

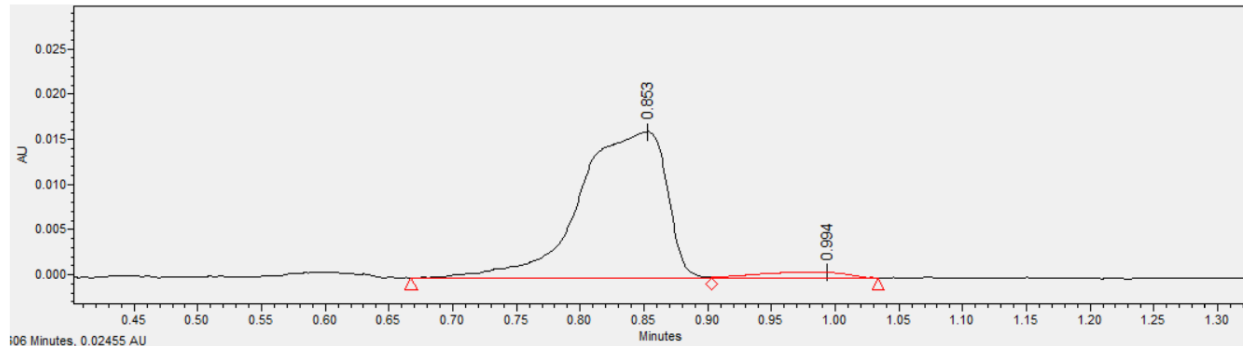

**Enantioenriched 8a**

**16a:** SFC Conditions: CEL-1, [97:3 to 50:50 CO<sub>2</sub>:(IPA/MeOH = 1:1)], 8 min, 1.5 mL/min

| Racemic <b>16a</b> Peak Results |        |                     |        |
|---------------------------------|--------|---------------------|--------|
|                                 | RT/min | Area/( $\mu$ V*sec) | % Area |
| 1                               | 2.091  | 43081               | 51.22  |
| 2                               | 2.230  | 41028               | 48.78  |

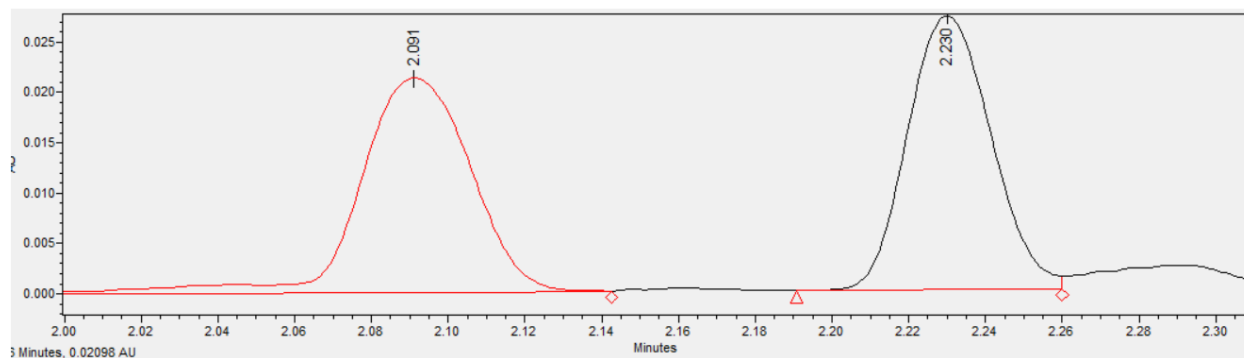

Racemic

| Enantioenriched <b>16a</b> Peak Results |        |                     |        |
|-----------------------------------------|--------|---------------------|--------|
|                                         | RT/min | Area/( $\mu$ V*sec) | % Area |
| 1                                       | 2.089  | 29034               | 96.04  |
| 2                                       | 2.225  | 1196                | 3.96   |

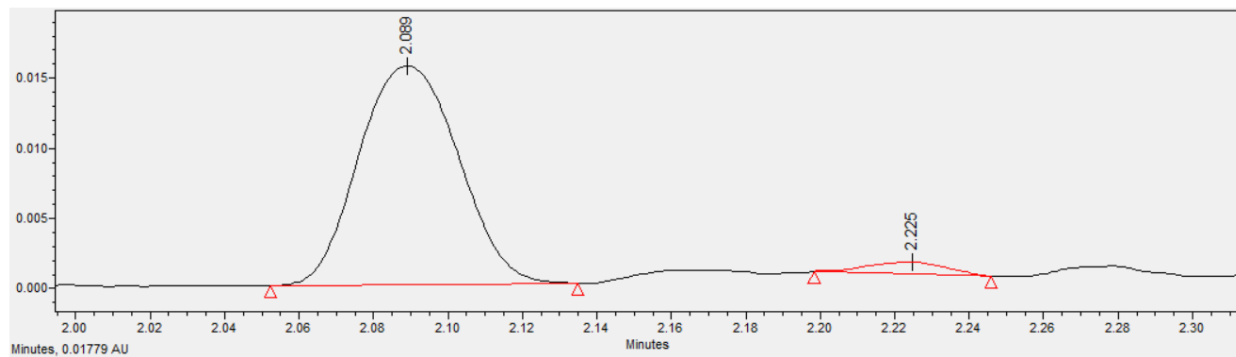

Enantioenriched **16a**

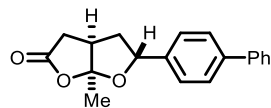

**16b:** 21.2 mg; 48% (7 h); white solid; purified by column chromatography (hexane/EtOAc = 2/1). **<sup>1</sup>H NMR** (500 MHz, CDCl<sub>3</sub>) δ 7.62 – 7.54 (m, 4H), 7.47 – 7.39 (m, 4H), 7.39 – 7.31 (m, 1H), 5.22 (dd, *J* = 10.4, 5.6 Hz, 1H), 3.08 – 2.98 (m, 2H), 2.65 (dd, *J* = 15.4, 7.2 Hz, 1H), 2.33 – 2.22 (m, 1H), 2.19 (ddd, *J* = 13.4, 5.6, 1.8 Hz, 1H), 1.81 (s, 3H). **<sup>13</sup>C NMR** (125 MHz, CDCl<sub>3</sub>) δ 174.8, 141.3, 140.7, 138.1, 128.8, 127.5, 127.4, 127.1, 126.5, 117.1, 80.1, 43.5, 41.9, 36.6, 24.4. **IR** (neat, cm<sup>-1</sup>): ν = 3031, 2986, 2166, 1974, 1770, 1388, 1256, 1088, 917, 766. **HRMS** (ESI): *m/z* 295.1329 calc. for C<sub>19</sub>H<sub>19</sub>O<sub>3</sub><sup>+</sup> [M+H]<sup>+</sup>, found 295.1328.

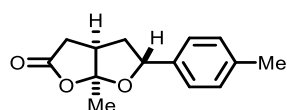

**16c:** 13.4 mg; 50% (10 h); colorless solid; purified by column chromatography (hexane/EtOAc = 2/1). Note: 12.8 mg product (65%, 0.085 mmol scale) was prepared according to the representative procedure with slow addition of DDQ for 1 h. **<sup>1</sup>H NMR** (500 MHz, CDCl<sub>3</sub>) δ 7.24 – 7.15 (m, 4H), 5.13 (dd, *J* = 10.4, 5.5 Hz, 1H), 3.06 – 2.94 (m, 2H), 2.66 – 2.56 (m, 1H), 2.35 (s, 3H), 2.26 – 2.17 (m, 1H), 2.12 (ddd, *J* = 13.0, 5.5, 1.9 Hz, 1H), 1.77 (s, 3H). **<sup>13</sup>C NMR** (125 MHz, CDCl<sub>3</sub>) δ 174.8, 138.1, 136.1, 129.3, 126.0, 117.1, 80.2, 43.4, 41.9, 36.6, 24.4, 21.2. **IR** (neat, cm<sup>-1</sup>): ν = 2925, 2159, 1976, 1770, 1256, 1088, 919. **HRMS** (ESI): *m/z* 233.1172 calc. for C<sub>14</sub>H<sub>17</sub>O<sub>3</sub><sup>+</sup> [M+H]<sup>+</sup>, found 233.1173.

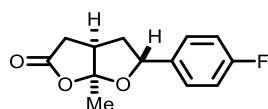

**16d:** 14.6 mg; 44% (10 h); colorless solid; purified by column chromatography (hexane/EtOAc = 2/1). Note: 14.0 mg product (62%, 0.0985 mmol scale) was prepared according to the representative procedure with slow addition of DDQ for 1 h. **<sup>1</sup>H NMR** (500 MHz, CDCl<sub>3</sub>) δ 7.35 – 7.26 (m, 2H), 7.11 – 7.01 (m, 2H), 5.13 (dd, *J* = 10.3, 5.8 Hz, 1H), 3.08 – 2.91 (m, 2H), 2.61 (d, *J* = 15.4 Hz, 1H), 2.22 – 2.07 (m, 2H), 1.77 (s, 3H). **<sup>13</sup>C NMR** (125 MHz, CDCl<sub>3</sub>) δ 174.7, 162.6 (d, *J* = 246 Hz), 134.9 (d, *J* = 3 Hz), 127.7 (d, *J* = 9 Hz), 117.0, 115.5 (d, *J* = 21 Hz), 79.6, 43.4, 42.0, 36.6, 24.3. **<sup>19</sup>F NMR** (471 MHz, CDCl<sub>3</sub>) δ -115.0. **IR** (neat, cm<sup>-1</sup>): ν = 2960, 1771, 1732, 1513, 1373, 1230, 1159, 1128, 1089, 919, 836. **HRMS** (ESI): *m/z* 237.0921 calc. for C<sub>13</sub>H<sub>14</sub>FO<sub>3</sub><sup>+</sup> [M+H]<sup>+</sup>, found 237.0921.

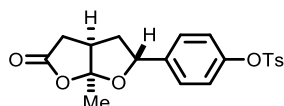

**16e**: 51.4 mg; 68% (7 h); 55% with toluene as solvent; colorless solid; purified by column chromatography (hexane/EtOAc = 2/1). **<sup>1</sup>H NMR** (500 MHz, CDCl<sub>3</sub>) δ 7.75 – 7.56 (m, 2H), 7.33 – 7.28 (m, 2H), 7.26 – 7.23 (m, 2H), 7.03 – 6.93 (m, 2H), 5.10 (dd, *J* = 9.4, 6.7 Hz, 1H), 3.06 – 2.94 (m, 2H), 2.64 – 2.53 (m, 1H), 2.44 (s, 3H), 2.18 – 2.08 (m, 2H), 1.75 (s, 3H). **<sup>13</sup>C NMR** (125 MHz, CDCl<sub>3</sub>) δ 174.6, 149.3, 145.5, 138.2, 132.3, 129.8, 128.5, 127.2, 122.6, 117.0, 79.4, 43.4, 42.0, 36.5, 24.3, 21.7. **IR** (neat, cm<sup>-1</sup>): ν = 2987, 2196, 1772, 1505, 1371, 1198, 1176, 1154, 1092, 920, 866, 568, 552. **HRMS** (ESI): *m/z* 389.1053 calc. for C<sub>20</sub>H<sub>21</sub>O<sub>6</sub>S<sup>+</sup> [M+H]<sup>+</sup>, found 389.1054.

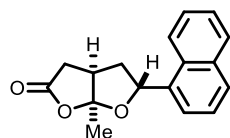

**16f**: 36.6 mg; 67% (7 h); white solid; purified by column chromatography (hexane/EtOAc = 2/1). **<sup>1</sup>H NMR** (500 MHz, CDCl<sub>3</sub>) δ 8.02 – 7.72 (m, 3H), 7.69 – 7.37 (m, 4H), 5.89 (t, *J* = 7.8 Hz, 1H), 3.13 – 3.01 (m, 2H), 2.76 – 2.67 (m, 1H), 2.38 (ddd, *J* = 6.9, 5.2, 1.8 Hz, 2H), 1.86 (s, 3H). **<sup>13</sup>C NMR** (125 MHz, CDCl<sub>3</sub>) δ 174.7, 134.9, 133.7, 130.4, 128.9, 128.6, 126.4, 125.8, 125.4, 123.1, 122.3, 117.1, 77.6, 43.4, 40.7, 36.9, 24.2. **IR** (neat, cm<sup>-1</sup>): ν = 2935, 1770, 1258, 1089, 919, 836, 779. **HRMS** (ESI): *m/z* 269.1172 calc. for C<sub>17</sub>H<sub>17</sub>O<sub>3</sub><sup>+</sup> [M+H]<sup>+</sup>, found 269.1172.

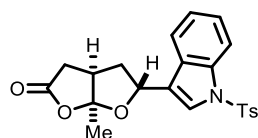

**16g**: 37.0 mg; 45% (7 h); white solid; purified by column chromatography (hexane/EtOAc = 2/1). **<sup>1</sup>H NMR** (500 MHz, CDCl<sub>3</sub>) δ 7.97 (dt, *J* = 8.4, 0.9 Hz, 1H), 7.80 – 7.71 (m, 2H), 7.58 – 7.50 (m, 2H), 7.33 (ddd, *J* = 8.4, 7.2, 1.3 Hz, 1H), 7.26 – 7.19 (m, 3H), 5.36 (ddd, *J* = 10.5, 5.6, 1.0 Hz, 1H), 3.09 – 2.98 (m, 2H), 2.69 – 2.59 (m, 1H), 2.51 – 2.40 (m, 1H), 2.35 (s, 3H), 2.18 (ddd, *J* = 13.2, 5.7, 2.0 Hz, 1H), 1.78 (s, 3H). **<sup>13</sup>C NMR** (125 MHz, CDCl<sub>3</sub>) δ 174.5, 145.2, 135.4, 135.1, 130.0, 128.5, 126.9, 125.1, 123.4, 123.2, 120.4, 120.1, 116.9, 113.8, 74.2, 43.3, 39.5, 36.7, 24.3, 21.6. **IR** (neat, cm<sup>-1</sup>): ν = 2925, 1771, 1446, 1370, 1258, 1174, 1123, 1087, 990, 917, 582, 538. **HRMS** (ESI): *m/z* 412.1213 calc. for C<sub>22</sub>H<sub>22</sub>NO<sub>5</sub>S<sup>+</sup> [M+H]<sup>+</sup>, found 412.1209.

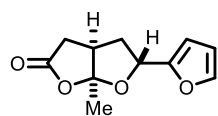

**16h**: 22.7 mg; 55% (7 h); colorless liquid; purified by column chromatography (hexane/EtOAc = 2/1). **<sup>1</sup>H NMR** (500 MHz, CDCl<sub>3</sub>) δ 7.42 (dd, *J* = 1.8, 1.0 Hz, 1H), 6.40 – 6.27 (m, 2H), 5.18 (dd, *J* = 9.6, 6.0 Hz,

1H), 3.05 – 2.93 (m, 2H), 2.65 – 2.54 (m, 2H), 2.06 – 1.98 (m, 1H), 1.72 (s, 3H). **<sup>13</sup>C NMR** (125 MHz, CDCl<sub>3</sub>) δ 174.4, 151.0, 143.2, 116.9, 110.4, 109.1, 73.8, 43.2, 37.3, 36.5, 24.1. **IR** (neat, cm<sup>-1</sup>): ν = 2926, 1769, 1257, 1088, 999, 916, 745. **HRMS** (ESI): *m/z* 209.0808 calc. for C<sub>11</sub>H<sub>13</sub>O<sub>4</sub><sup>+</sup> [M+H]<sup>+</sup>, found 209.0809.

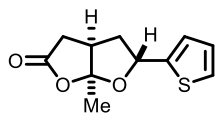

**16i**: 18.5 mg; 42% (4 h); colorless liquid; purified by column chromatography (hexane/EtOAc = 2/1). **<sup>1</sup>H NMR** (500 MHz, CDCl<sub>3</sub>) δ 7.30 (dd, *J* = 5.1, 1.2 Hz, 1H), 7.07 – 6.94 (m, 2H), 5.42 (dd, *J* = 10.0, 5.6 Hz, 1H), 3.04 – 2.94 (m, 2H), 2.64 – 2.54 (m, 1H), 2.44 – 2.36 (m, 1H), 2.20 (ddd, *J* = 13.6, 5.6, 2.2 Hz, 1H), 1.75 (s, 3H). **<sup>13</sup>C NMR** (125 MHz, CDCl<sub>3</sub>) δ 174.5, 142.1, 126.8, 125.7, 116.8, 76.4, 43.4, 42.0, 36.5, 24.4. **IR** (neat, cm<sup>-1</sup>): ν = 2935, 1772, 1256, 1127, 1090, 919, 708. **HRMS** (ESI): *m/z* 225.0580 calc. for C<sub>11</sub>H<sub>13</sub>O<sub>3</sub>S<sup>+</sup> [M+H]<sup>+</sup>, found 225.0581.

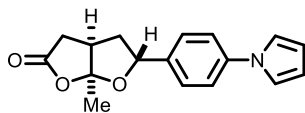

**16j**: 22.0 mg; 40% (7 h); colorless liquid; purified by column chromatography (hexane/EtOAc = 2/1). **<sup>1</sup>H NMR** (500 MHz, CDCl<sub>3</sub>) δ 7.39 (s, 4H), 7.08 (t, *J* = 2.2 Hz, 2H), 6.35 (t, *J* = 2.2 Hz, 2H), 5.18 (dd, *J* = 10.4, 5.7 Hz, 1H), 3.08 – 2.98 (m, 2H), 2.68 – 2.59 (m, 1H), 2.27 – 2.14 (m, 2H), 1.80 (s, 3H). **<sup>13</sup>C NMR** (125 MHz, CDCl<sub>3</sub>) δ 174.6, 140.6, 136.4, 127.3, 120.6, 119.3, 117.0, 110.6, 79.7, 43.4, 41.9, 36.6, 24.4. **IR** (neat, cm<sup>-1</sup>): ν = 2935, 1769, 1524, 1328, 1256, 1124, 1088, 917, 731. **HRMS** (ESI): *m/z* 284.1281 calc. for C<sub>17</sub>H<sub>18</sub>NO<sub>3</sub><sup>+</sup> [M+H]<sup>+</sup>, found 284.1281.

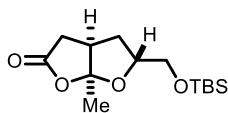

**16k**: 20.2 mg; 36% (4 h); colorless liquid; purified by column chromatography (hexane/EtOAc = 2/1). **<sup>1</sup>H NMR** (500 MHz, CDCl<sub>3</sub>) δ 4.28 (ddt, *J* = 7.9, 6.5, 3.7 Hz, 1H), 3.74 (dd, *J* = 11.1, 3.8 Hz, 1H), 3.65 (dd, *J* = 11.1, 3.6 Hz, 1H), 2.92 – 2.78 (m, 2H), 2.51 (dd, *J* = 17.4, 1.8 Hz, 1H), 2.28 – 2.18 (m, 1H), 1.77 (ddd, *J* = 12.8, 6.6, 4.1 Hz, 1H), 1.64 (s, 3H), 0.89 (s, 9H), 0.06 (s, 6H). **<sup>13</sup>C NMR** (125 MHz, CDCl<sub>3</sub>) δ 174.6, 117.9, 80.1, 64.2, 43.3, 36.8, 34.6, 25.9, 23.8, 18.3, -5.3, -5.4. **IR** (neat, cm<sup>-1</sup>): ν = 2954, 2929, 2857, 1775, 1253, 1136, 1096, 921, 836, 778. **HRMS** (ESI): *m/z* 287.1673 calc. for C<sub>14</sub>H<sub>27</sub>O<sub>4</sub>Si<sup>+</sup> [M+H]<sup>+</sup>, found 287.1674.

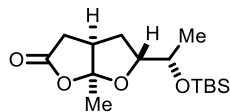

**16l:** 39.1 mg; 65% (6 h); colorless liquid; purified by column chromatography (hexane/EtOAc = 2/1). **<sup>1</sup>H NMR** (500 MHz, CDCl<sub>3</sub>) δ 4.03 – 3.91 (m, 2H), 2.90 (dd, *J* = 18.2, 9.6 Hz, 1H), 2.78 (tt, *J* = 9.7, 2.9 Hz, 1H), 2.50 (dd, *J* = 18.3, 2.7 Hz, 1H), 2.29 (dt, *J* = 12.9, 9.5 Hz, 1H), 1.66 (ddd, *J* = 12.9, 6.0, 3.0 Hz, 1H), 1.62 (s, 3H), 1.09 (d, *J* = 6.3 Hz, 3H), 0.87 (s, 9H), 0.05 (d, *J* = 7.9 Hz, 6H). **<sup>13</sup>C NMR** (125 MHz, CDCl<sub>3</sub>) δ 174.8, 117.6, 83.5, 68.2, 43.0, 37.0, 32.7, 25.8, 23.8, 20.8, 18.0, -4.5, -4.6. **IR** (neat, cm<sup>-1</sup>): ν = 2955, 2930, 2886, 2857, 1774, 1254, 1091, 1005, 939, 916, 835, 776. **HRMS** (ESI): *m/z* 301.1830 calc. for C<sub>15</sub>H<sub>29</sub>O<sub>4</sub>Si<sup>+</sup> [M+H]<sup>+</sup>, found 301.1829.

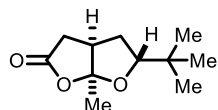

**16m:** 21.6 mg; 55% (3 h); white solid; purified by column chromatography (hexane/EtOAc = 2/1). **<sup>1</sup>H NMR** (500 MHz, CDCl<sub>3</sub>) δ 3.87 (dd, *J* = 10.4, 5.8 Hz, 1H), 2.91 (dd, *J* = 18.4, 9.9 Hz, 1H), 2.77 (tt, *J* = 9.6, 2.7 Hz, 1H), 2.49 (dd, *J* = 18.4, 3.2 Hz, 1H), 2.01 (dt, *J* = 12.9, 9.9 Hz, 1H), 1.62 (s, 3H), 1.62 – 1.57 (m, 1H), 0.89 (s, 9H). **<sup>13</sup>C NMR** (125 MHz, CDCl<sub>3</sub>) δ 175.0, 117.4, 86.7, 43.1, 37.0, 33.8, 32.8, 25.6, 24.1. **IR** (neat, cm<sup>-1</sup>): ν = 2958, 2871, 1770, 1387, 1258, 1091, 1000, 917. **HRMS** (ESI): *m/z* 199.1329 calc. for C<sub>11</sub>H<sub>19</sub>O<sub>3</sub><sup>+</sup> [M+H]<sup>+</sup>, found 199.1329.

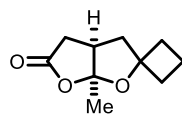

**16n:** 20.5 mg; 57% (5 h); 46% with toluene as solvent; colorless liquid; purified by column chromatography (hexane/EtOAc = 2/1). **<sup>1</sup>H NMR** (500 MHz, CDCl<sub>3</sub>) δ 2.94 – 2.79 (m, 2H), 2.51 (dd, *J* = 17.8, 2.1 Hz, 1H), 2.44 – 2.33 (m, 2H), 2.28 (dd, *J* = 13.0, 9.2 Hz, 1H), 2.08 – 1.97 (m, 3H), 1.77 (tddd, *J* = 10.9, 6.4, 3.2, 0.9 Hz, 1H), 1.61 (d, *J* = 0.9 Hz, 3H), 1.59 – 1.52 (m, 1H). **<sup>13</sup>C NMR** (125 MHz, CDCl<sub>3</sub>) δ 174.4, 117.3, 85.2, 43.4, 43.3, 37.0, 36.4, 34.7, 24.5, 13.0. **IR** (neat, cm<sup>-1</sup>): ν = 2935, 1771, 1387, 1272, 1140, 1080, 925. **HRMS** (ESI): *m/z* 183.1016 calc. for C<sub>10</sub>H<sub>15</sub>O<sub>3</sub><sup>+</sup> [M+H]<sup>+</sup>, found 183.1016.

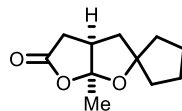

**16o**: 26.6 mg; 68% (3 h); colorless liquid; purified by column chromatography (hexane/EtOAc = 2/1). **<sup>1</sup>H NMR** (500 MHz, CDCl<sub>3</sub>) δ 2.93 – 2.81 (m, 2H), 2.56 – 2.48 (m, 1H), 2.35 – 2.27 (m, 1H), 2.02 – 1.93 (m, 1H), 1.88 – 1.71 (m, 4H), 1.65 – 1.57 (m, 7H). **<sup>13</sup>C NMR** (125 MHz, CDCl<sub>3</sub>) δ 174.5, 117.7, 94.6, 44.0, 43.1, 39.6, 39.0, 37.1, 25.0, 24.3, 23.6. **IR** (neat, cm<sup>-1</sup>): ν = 2959, 2872, 1769, 1738, 1258, 1084, 906. **HRMS** (ESI): *m/z* 197.1172 calc. for C<sub>11</sub>H<sub>17</sub>O<sub>3</sub><sup>+</sup> [M+H]<sup>+</sup>, found 197.1173.

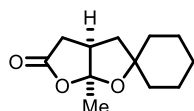

**16p**: 30.1 mg; 72% (4 h); colorless liquid; purified by column chromatography (hexane/EtOAc = 2/1). **<sup>1</sup>H NMR** (500 MHz, CDCl<sub>3</sub>) δ 2.91 – 2.70 (m, 2H), 2.53 – 2.43 (m, 1H), 2.27 – 2.16 (m, 1H), 1.71 – 1.51 (m, 9H), 1.47 – 1.30 (m, 5H). **<sup>13</sup>C NMR** (125 MHz, CDCl<sub>3</sub>) δ 174.2, 117.6, 87.2, 43.7, 42.8, 38.7, 38.1, 37.2, 25.1, 24.7, 23.4. **IR** (neat, cm<sup>-1</sup>): ν = 2933, 2859, 1767, 1449, 1385, 1273, 1250, 1148, 983, 902. **HRMS** (ESI): *m/z* 211.1329 calc. for C<sub>12</sub>H<sub>19</sub>O<sub>3</sub><sup>+</sup> [M+H]<sup>+</sup>, found 211.1330.

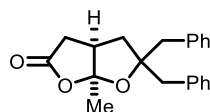

**16q**: 36.4 mg; 57% (17 h); colorless liquid; purified by column chromatography (hexane/EtOAc = 2/1). **<sup>1</sup>H NMR** (500 MHz, CDCl<sub>3</sub>) δ 7.38 – 7.14 (m, 10H), 3.13 (d, *J* = 13.7 Hz, 1H), 2.94 (d, *J* = 13.7 Hz, 1H), 2.86 (d, *J* = 13.8 Hz, 1H), 2.62 – 2.49 (m, 2H), 2.44 – 2.36 (m, 1H), 2.33 (d, *J* = 17.7 Hz, 1H), 1.77 – 1.67 (m, 2H), 1.41 (s, 3H). **<sup>13</sup>C NMR** (125 MHz, CDCl<sub>3</sub>) δ 173.7, 136.9, 136.8, 131.0, 130.8, 128.1, 128.0, 126.7, 126.7, 118.6, 89.8, 48.9, 44.9, 44.2, 40.6, 36.9, 22.8. **IR** (neat, cm<sup>-1</sup>): ν = 3061, 3028, 2934, 1969, 1766, 1454, 1263, 1151, 1093, 895, 751, 702. **HRMS** (ESI): *m/z* 323.1642 calc. for C<sub>21</sub>H<sub>23</sub>O<sub>3</sub><sup>+</sup> [M+H]<sup>+</sup>, found 323.1641.

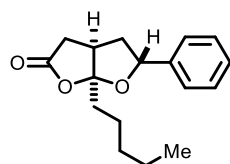

**16r**: 39.7 mg; 73% (6 h); colorless liquid; purified by column chromatography (hexane/EtOAc = 2/1). **<sup>1</sup>H NMR** (500 MHz, CDCl<sub>3</sub>) δ 7.40 – 7.28 (m, 5H), 5.15 (dd, *J* = 9.6, 6.5 Hz, 1H), 3.08 – 2.94 (m, 2H), 2.60 (dd, *J* = 18.0, 2.7 Hz, 1H), 2.18 – 2.10 (m, 2H), 2.04 – 1.97 (m, 2H), 1.53 (pd, *J* = 5.8, 3.2 Hz, 2H), 1.39 – 1.31 (m, *J* = 3.4 Hz, 4H), 0.91 (td, *J* = 5.8, 4.6, 2.5 Hz, 3H). **<sup>13</sup>C NMR** (125 MHz, CDCl<sub>3</sub>) δ 175.0, 139.2, 128.6, 128.2, 126.0, 119.2, 79.9, 42.3, 41.7, 37.5, 36.7, 31.7, 23.3, 22.5, 14.0. **IR** (neat, cm<sup>-1</sup>): ν = 2930,

2870, 1768, 1251, 1126, 987, 921, 902, 756, 699. **HRMS** (ESI):  $m/z$  275.1642 calc. for  $C_{17}H_{23}O_3^+$   $[M+H]^+$ , found 275.1642.

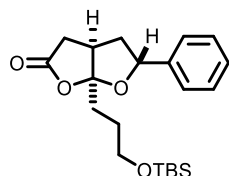

**16s**: 51.5 mg; 68% (6 h); colorless liquid; purified by column chromatography (hexane/EtOAc = 2/1).  **$^1H$  NMR** (500 MHz,  $CDCl_3$ )  $\delta$  7.36 – 7.31 (m, 5H), 5.16 (dd,  $J$  = 9.9, 6.2 Hz, 1H), 3.74 – 3.63 (m, 2H), 3.08 – 2.92 (m, 2H), 2.61 (dd,  $J$  = 18.2, 2.9 Hz, 1H), 2.19 – 2.02 (m, 4H), 1.79 – 1.69 (m, 2H), 0.90 (s, 9H), 0.06 (s, 6H).  **$^{13}C$  NMR** (125 MHz,  $CDCl_3$ )  $\delta$  175.0, 139.2, 128.6, 128.2, 126.0, 119.1, 80.0, 62.6, 42.3, 41.8, 36.6, 34.0, 27.1, 26.0, 18.4, -5.3. **IR** (neat,  $cm^{-1}$ ):  $\nu$  = 2955, 2929, 2856, 2032, 1974, 1776, 1257, 1099, 835, 777, 699. **HRMS** (ESI):  $m/z$  377.2143 calc. for  $C_{21}H_{33}O_4Si^+$   $[M+H]^+$ , found 377.2142.

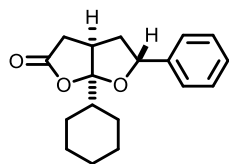

**16t**: 35.0 mg; 60% (5 h); colorless liquid; purified by column chromatography (hexane/EtOAc = 2/1).  **$^1H$  NMR** (500 MHz,  $CDCl_3$ )  $\delta$  7.40 – 7.27 (m, 5H), 5.13 (dd,  $J$  = 10.6, 5.7 Hz, 1H), 3.11 (tdd,  $J$  = 10.7, 3.3, 1.9 Hz, 1H), 2.94 (dd,  $J$  = 18.8, 10.7 Hz, 1H), 2.58 (dd,  $J$  = 18.8, 3.4 Hz, 1H), 2.14 – 2.03 (m, 2H), 2.00 – 1.88 (m, 3H), 1.87 – 1.78 (m, 2H), 1.76 – 1.69 (m, 1H), 1.31 – 1.14 (m, 5H).  **$^{13}C$  NMR** (125 MHz,  $CDCl_3$ )  $\delta$  175.2, 139.2, 128.6, 128.2, 126.0, 121.0, 79.7, 44.4, 42.7, 39.6, 36.9, 26.9, 26.2, 25.8. **IR** (neat,  $cm^{-1}$ ):  $\nu$  = 2929, 2854, 1772, 1450, 1257, 1217, 867, 918, 904, 760, 699. **HRMS** (ESI):  $m/z$  287.1642 calc. for  $C_{18}H_{23}O_3^+$   $[M+H]^+$ , found 287.1641.

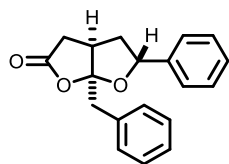

**16u**: 35.3 mg; 60% (21 h); colorless liquid; purified by column chromatography (hexane/EtOAc = 2/1).  **$^1H$  NMR** (500 MHz,  $CDCl_3$ )  $\delta$  7.40 – 7.27 (m, 10H), 5.16 (dd,  $J$  = 10.3, 5.9 Hz, 1H), 3.37 (d,  $J$  = 13.9 Hz, 1H), 3.29 (d,  $J$  = 13.9 Hz, 1H), 3.08 (dddd,  $J$  = 9.2, 6.7, 4.2, 2.0 Hz, 1H), 2.52 – 2.38 (m, 2H), 2.05 – 1.93 (m, 2H).  **$^{13}C$  NMR** (125 MHz,  $CDCl_3$ )  $\delta$  174.8, 139.0, 134.3, 130.6, 128.6, 128.3, 127.4, 126.2, 118.2, 80.3,

43.2, 41.8, 40.9, 36.7. **IR** (neat,  $\text{cm}^{-1}$ ):  $\nu = 3031, 2927, 1772, 1455, 1262, 983, 906, 760, 700$ . **HRMS** (ESI):  $m/z$  295.1329 calc. for  $\text{C}_{19}\text{H}_{19}\text{O}_3^+$   $[\text{M}+\text{H}]^+$ , found 295.1329.

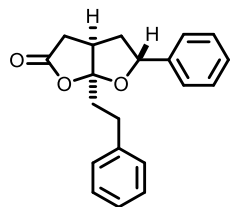

**16v**: 40.1 mg; 65% (17 h); colorless liquid; purified by column chromatography (hexane/EtOAc = 2/1).  **$^1\text{H}$  NMR** (500 MHz,  $\text{CDCl}_3$ )  $\delta$  7.40 – 7.29 (m, 7H), 7.28 – 7.21 (m, 3H), 5.19 (dd,  $J = 9.6, 6.5$  Hz, 1H), 3.05 – 2.87 (m, 4H), 2.68 – 2.55 (m, 1H), 2.35 (q,  $J = 8.0$  Hz, 2H), 2.22 – 2.12 (m, 2H).  **$^{13}\text{C}$  NMR** (125 MHz,  $\text{CDCl}_3$ )  $\delta$  174.9, 140.8, 139.0, 128.6, 128.3, 128.3, 126.3, 126.0, 118.4, 80.0, 42.2, 41.9, 39.3, 36.5, 30.0. **IR** (neat,  $\text{cm}^{-1}$ ):  $\nu = 3028, 2936, 1770, 1497, 1454, 1265, 1243, 1177, 1029, 922, 902, 754, 700$ . **HRMS** (ESI):  $m/z$  309.1485 calc. for  $\text{C}_{20}\text{H}_{21}\text{O}_3^+$   $[\text{M}+\text{H}]^+$ , found 309.1482.

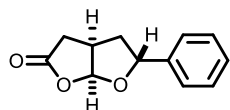

**16w**: 26.5 mg; 65% (10 h); colorless liquid; purified by column chromatography (hexane/EtOAc = 2/1).  **$^1\text{H}$  NMR** (500 MHz,  $\text{CDCl}_3$ )  $\delta$  7.39 – 7.31 (m, 5H), 6.29 (d,  $J = 5.6$  Hz, 1H), 5.18 (dd,  $J = 9.8, 6.0$  Hz, 1H), 3.38 – 3.31 (m, 1H), 2.95 (dd,  $J = 18.8, 10.6$  Hz, 1H), 2.56 (dd,  $J = 18.8, 4.0$  Hz, 1H), 2.21 – 2.12 (m, 2H).  **$^{13}\text{C}$  NMR** (125 MHz,  $\text{CDCl}_3$ )  $\delta$  175.3, 138.9, 128.6, 128.3, 126.0, 108.1, 80.0, 41.2, 38.9, 35.1. **IR** (neat,  $\text{cm}^{-1}$ ):  $\nu = 2924, 2160, 1782, 1177, 1103, 975, 897, 759, 701$ . **HRMS** (ESI):  $m/z$  203.0703 calc. for  $\text{C}_{12}\text{H}_{11}\text{O}_3^+$   $[\text{M}-\text{H}]^+$ , found 203.0704.

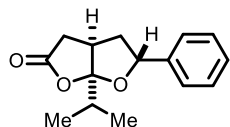

**16x**: 28.4 mg; 58% (4 h); colorless liquid; purified by column chromatography (hexane/EtOAc = 2/1).  **$^1\text{H}$  NMR** (500 MHz,  $\text{CDCl}_3$ )  $\delta$  7.39 – 7.29 (m, 5H), 5.20 – 5.06 (m, 1H), 3.14 – 3.04 (m, 1H), 2.96 (dd,  $J = 18.8, 10.7$  Hz, 1H), 2.60 (dd,  $J = 18.8, 3.4$  Hz, 1H), 2.32 – 2.22 (m, 1H), 2.14 – 2.03 (m, 2H), 1.11 (dd,  $J = 11.0, 6.8$  Hz, 6H).  **$^{13}\text{C}$  NMR** (125 MHz,  $\text{CDCl}_3$ )  $\delta$  175.3, 139.1, 128.6, 128.2, 126.0, 121.5, 79.8, 42.8, 39.4, 37.0, 34.9, 16.9, 16.9. **IR** (neat,  $\text{cm}^{-1}$ ):  $\nu = 2969, 1769, 1245, 1227, 1098, 973, 949, 923, 904, 700$ . **HRMS** (ESI):  $m/z$  247.1329 calc. for  $\text{C}_{15}\text{H}_{19}\text{O}_3^+$   $[\text{M}+\text{H}]^+$ , found 247.1327.

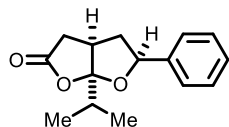

**16y**: 27.6 mg; 56% (30 h); colorless liquid; purified by column chromatography (hexane/EtOAc = 2/1).  $^1\text{H}$  NMR (500 MHz,  $\text{CDCl}_3$ )  $\delta$  7.43 – 7.30 (m, 4H), 7.31 – 7.25 (m, 1H), 5.17 (dd,  $J$  = 9.0, 6.5 Hz, 1H), 3.02 (qd,  $J$  = 8.7, 1.8 Hz, 1H), 2.81 – 2.68 (m, 2H), 2.39 (dd,  $J$  = 18.2, 1.8 Hz, 1H), 2.19 (p,  $J$  = 6.8 Hz, 1H), 1.82 (dt,  $J$  = 13.0, 8.9 Hz, 1H), 1.08 (dd,  $J$  = 14.6, 6.8 Hz, 6H).  $^{13}\text{C}$  NMR (125 MHz,  $\text{CDCl}_3$ )  $\delta$  174.2, 141.0, 128.6, 127.9, 125.6, 121.5, 83.2, 41.8, 40.3, 36.9, 35.3, 16.9, 16.6. IR (neat,  $\text{cm}^{-1}$ ):  $\nu$  = 2970, 2159, 2022, 1972, 1775, 1061, 998, 945. HRMS (ESI):  $m/z$  247.1329 calc. for  $\text{C}_{15}\text{H}_{19}\text{O}_3^+$   $[\text{M}+\text{H}]^+$ , found 247.1326.

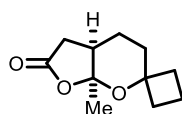

**16za**: 19.4 mg; 50% (5 h); colorless liquid; purified by column chromatography (hexane/EtOAc = 2/1).  $^1\text{H}$  NMR (500 MHz,  $\text{CDCl}_3$ )  $\delta$  2.73 (dd,  $J$  = 17.3, 7.4 Hz, 1H), 2.33 (dd,  $J$  = 17.3, 2.7 Hz, 1H), 2.30 – 2.16 (m, 3H), 2.02 – 1.90 (m, 2H), 1.89 – 1.72 (m, 3H), 1.64 – 1.57 (m, 2H), 1.54 – 1.49 (m, 4H).  $^{13}\text{C}$  NMR (125 MHz,  $\text{CDCl}_3$ )  $\delta$  174.2, 108.7, 76.0, 37.2, 37.1, 35.0, 34.0, 29.6, 26.4, 22.4, 13.2. IR (neat,  $\text{cm}^{-1}$ ):  $\nu$  = 2988, 2938, 1770, 1277, 1244, 1111, 1065, 942, 897. HRMS (ESI):  $m/z$  197.1172 calc. for  $\text{C}_{11}\text{H}_{17}\text{O}_3^+$   $[\text{M}+\text{H}]^+$ , found 197.1173.

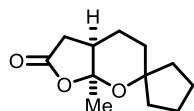

**16zb**: 20.2 mg; 48% (4 h); white solid; purified by column chromatography (hexane/EtOAc = 2/1).  $^1\text{H}$  NMR (500 MHz,  $\text{CDCl}_3$ )  $\delta$  2.83 (dd,  $J$  = 17.4, 7.6 Hz, 1H), 2.31 (dd,  $J$  = 17.4, 1.4 Hz, 1H), 2.25 (dddd,  $J$  = 9.9, 7.8, 6.5, 1.4 Hz, 1H), 2.15 – 2.07 (m, 1H), 1.90 – 1.74 (m, 4H), 1.69 – 1.63 (m, 1H), 1.62 – 1.56 (m, 3H), 1.54 – 1.41 (m, 6H).  $^{13}\text{C}$  NMR (125 MHz,  $\text{CDCl}_3$ )  $\delta$  174.1, 109.6, 84.9, 41.0, 37.9, 37.3, 36.7, 31.6, 27.6, 24.1, 24.0, 22.9. IR (neat,  $\text{cm}^{-1}$ ):  $\nu$  = 2941, 2870, 1767, 1250, 1179, 1117, 1022, 896, 868. HRMS (ESI):  $m/z$  211.1329 calc. for  $\text{C}_{12}\text{H}_{19}\text{O}_3^+$   $[\text{M}+\text{H}]^+$ , found 211.1328.

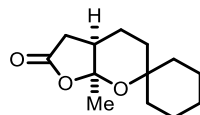

**16zc**: 23.8 mg; 53% (4 h); white solid; purified by column chromatography (hexane/EtOAc = 2/1).  $^1\text{H}$  NMR (500 MHz,  $\text{CDCl}_3$ )  $\delta$  2.84 (dd,  $J$  = 17.6, 8.0 Hz, 1H), 2.35 – 2.23 (m, 2H), 1.92 – 1.84 (m, 1H), 1.82

– 1.76 (m, 1H), 1.74 – 1.64 (m, 2H), 1.64 – 1.57 (m, 3H), 1.53 – 1.46 (m, 5H), 1.44 – 1.27 (m, 5H).  $^{13}\text{C}$  NMR (125 MHz,  $\text{CDCl}_3$ )  $\delta$  174.4, 109.6, 74.9, 39.4, 37.8, 37.5, 35.6, 31.0, 28.0, 25.8, 22.4, 22.0. IR (neat,  $\text{cm}^{-1}$ ):  $\nu$  = 2933, 2860, 1766, 1270, 1249, 1139, 1048. 896, 883. HRMS (ESI):  $m/z$  225.1485 calc. for  $\text{C}_{13}\text{H}_{21}\text{O}_3^+$   $[\text{M}+\text{H}]^+$ , found 225.1485.

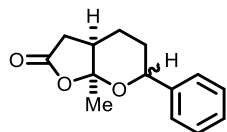

**16zd**: 35.0 mg as a mixture of 1:1.3 diastereomers from a 1:1 mixture of starting materials; 75% (4 h); colorless liquid; purified by column chromatography (hexane/EtOAc = 2/1).  $^1\text{H}$  NMR (500 MHz,  $\text{CDCl}_3$ )  $\delta$  7.35 (t,  $J$  = 4.4 Hz, 9H), 7.29 (dddd,  $J$  = 7.1, 6.3, 3.4, 2.0 Hz, 2H), 4.76 (dd,  $J$  = 11.2, 2.3 Hz, 1H), 4.58 (dd,  $J$  = 11.0, 3.0 Hz, 1H), 2.90 (dd,  $J$  = 17.2, 6.9 Hz, 1H), 2.84 – 2.74 (m, 1H), 2.51 – 2.43 (m, 3H), 2.40 – 2.30 (m, 2H), 2.14 – 2.04 (m, 3H), 2.01 – 1.94 (m, 1H), 1.91 – 1.84 (m, 1H), 1.83 – 1.51 (m, 14H).  $^{13}\text{C}$  NMR (125 MHz,  $\text{CDCl}_3$ )  $\delta$  175.6, 173.9, 141.3, 141.1, 128.5, 127.9, 127.8, 126.1, 125.6, 109.2, 107.0, 75.6, 74.0, 38.6, 37.7, 36.7, 31.4, 30.4, 27.1, 26.8, 26.4, 22.4, 20.7. IR (neat,  $\text{cm}^{-1}$ ):  $\nu$  = 2989, 2938, 2864, 1788, 1452, 1385, 1250, 1222, 1176, 1157, 1089, 1075, 1047, 943, 899, 701. HRMS (ESI):  $m/z$  233.1172 calc. for  $\text{C}_{14}\text{H}_{17}\text{O}_3^+$   $[\text{M}+\text{H}]^+$ , found 233.1172.

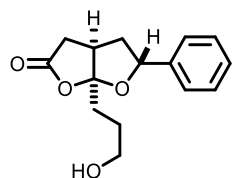

**21**: 14.0 mg; 47% (5 h); colorless solid; purified by column chromatography (hexane/EtOAc = 2/1).  $^1\text{H}$  NMR (500 MHz,  $\text{CDCl}_3$ )  $\delta$  7.40 – 7.29 (m, 5H), 5.17 (dd,  $J$  = 10.1, 6.0 Hz, 1H), 3.75 (td,  $J$  = 6.3, 1.7 Hz, 2H), 3.09 – 2.95 (m, 2H), 2.62 (dd,  $J$  = 18.1, 2.7 Hz, 1H), 2.22 – 2.08 (m, 4H), 1.84 (tt,  $J$  = 8.2, 6.3 Hz, 2H).  $^{13}\text{C}$  NMR (125 MHz,  $\text{CDCl}_3$ )  $\delta$  174.9, 139.0, 128.6, 128.3, 126.0, 118.7, 80.2, 62.4, 42.1, 42.1, 36.6, 34.1, 26.8. IR (neat,  $\text{cm}^{-1}$ ):  $\nu$  = 3446, 2928, 2006, 1769, 1320, 1264, 1124, 1059, 964, 904, 701. HRMS (ESI):  $m/z$  285.1097 calc. for  $\text{C}_{15}\text{H}_{18}\text{NaO}_4^+$   $[\text{M}+\text{Na}]^+$ , found 285.1096.

### Total Synthesis of Paeonilide

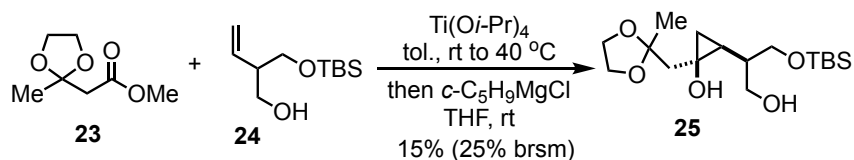

**25:** <sup>1</sup>H NMR (500 MHz, CDCl<sub>3</sub>) δ 4.00 (qd, *J* = 3.3, 1.3 Hz, 4H), 3.91 – 3.80 (m, 3H), 3.78 – 3.72 (m, 2H), 2.75 (s, 1H), 1.91 (d, *J* = 2.5 Hz, 2H), 1.73 (dddt, *J* = 8.8, 5.3, 3.6, 1.8 Hz, 1H), 1.43 (s, 3H), 0.91 (s, 9H), 0.72 (dd, *J* = 9.5, 5.2 Hz, 1H), 0.64 (td, *J* = 9.8, 6.3 Hz, 1H), 0.51 – 0.45 (m, 1H), 0.09 (d, *J* = 1.9 Hz, 6H). <sup>13</sup>C NMR (125 MHz, CDCl<sub>3</sub>) δ 110.9, 67.1, 66.5, 64.4, 55.6, 46.4, 42.0, 25.9, 24.4, 22.1, 18.2, 17.3, -5.5, -5.6. IR (neat, cm<sup>-1</sup>): ν = 3462, 2953, 2929, 2884, 2857, 1472, 1380, 1253, 1146, 1093, 1051, 948, 836, 778. HRMS (ESI): *m/z* 369.2068 calc. for C<sub>17</sub>H<sub>34</sub>NaO<sub>5</sub>Si<sup>+</sup> [M+Na]<sup>+</sup>, found 369.2067.

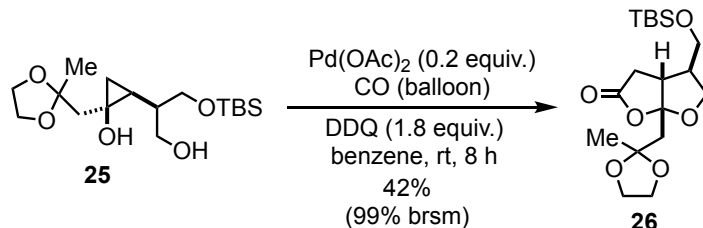

**26:** <sup>1</sup>H NMR (500 MHz, CDCl<sub>3</sub>) δ 4.05 (dd, *J* = 9.0, 7.1 Hz, 1H), 3.97–3.91 (m, 4H), 3.71–3.58 (m, 3H), 3.23 (ddd, *J* = 10.4, 9.2, 3.9 Hz, 1H), 2.75 (dd, *J* = 18.8, 3.9 Hz, 1H), 2.70–2.57 (m, 2H), 2.40 (d, *J* = 15.1 Hz, 1H), 2.28 (d, *J* = 15.1 Hz, 1H), 1.40 (s, 3H), 0.88 (s, 9H), 0.05 (d, *J* = 0.7 Hz, 6H). <sup>13</sup>C NMR (125 MHz, CDCl<sub>3</sub>) δ 175.3, 117.3, 108.0, 68.6, 64.4, 64.2, 60.2, 45.2, 43.4, 43.4, 29.9, 25.8, 25.3, 18.1, -5.5, -

5.6. **IR** (neat,  $\text{cm}^{-1}$ ):  $\nu = 2917, 2849, 1978, 1738, 1463, 1253, 1044, 778, 697$ . **HRMS** (ESI):  $m/z$  395.1860 calc. for  $\text{C}_{18}\text{H}_{32}\text{NaO}_6\text{Si}^+$   $[\text{M}+\text{Na}]^+$ , found 395.1861.

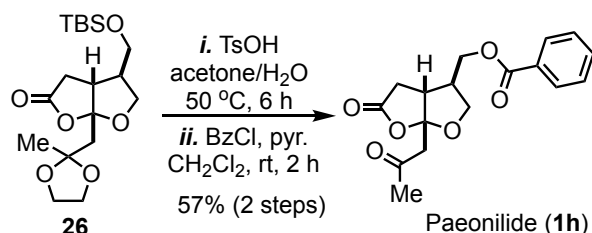

To a solution of *cis*-fused lactone **26** (13.9 mg, 0.037 mmol, 1.0 equiv.) in acetone: $\text{H}_2\text{O} = 15:1$  (1.75 ml:0.12 ml) at room temperature was added  $\text{TsOH} \cdot \text{H}_2\text{O}$  (3.5 mg, 0.019 mmol, 0.5 equiv.). The reaction was heated at  $50\text{ }^\circ\text{C}$  with an oil bath for 6 h. It was then cooled down, quenched with aqueous  $\text{NaHCO}_3$  and extracted with  $\text{EtOAc}$ . The combined organic layer was washed with brine, dried with  $\text{Na}_2\text{SO}_4$ , and concentrated under reduced pressure. The resulting residue was used in the next step without purification.

To a solution of alcohol (9.5 mg) in  $\text{CH}_2\text{Cl}_2$  at room temperature was added pyridine (0.03 ml) and  $\text{BzCl}$  (6.9  $\mu\text{l}$ , 0.06 mmol, 2.0 equiv.). After 2 h, the reaction was concentrated under reduced pressure. The resulting residue was purified by flash chromatography (hexane/ethyl acetate = 2/1) to obtain **1h** (6.7 mg, 57%, 2 steps) as colorless solid.

**$^1\text{H}$  NMR** (500 MHz,  $\text{CDCl}_3$ )  $\delta$  8.02 (d, 2H,  $J=7.8$  Hz), 7.60 (t, 1H,  $J=7.6$  Hz), 7.47 (t, 2H,  $J=7.6$  Hz), 4.29 (dd, 1H,  $J=7.2$  Hz, 11.0 Hz), 4.19 (dd, 1H,  $J=8.0$  Hz, 11.0 Hz), 4.00-4.06 (m, 2H), 3.41 (d, 1H,  $J=17.8$  Hz), 3.35 (dd, 1H,  $J=10.6$  Hz, 18.6 Hz), 2.94-2.98 (m, 1H), 2.96 (d, 1H,  $J=17.6$  Hz), 2.55 (dd, 1H,  $J=2.8$  Hz, 18.4 Hz), 2.53 (m, 1H), 2.20 (s, 3H).  **$^{13}\text{C}$  NMR** (125 MHz,  $\text{CDCl}_3$ )  $\delta$  204.4, 174.5, 166.4, 133.5, 129.6, 129.5, 128.6, 115.0, 67.9, 64.9, 49.5, 46.8, 44.4, 36.6, 31.0. **IR** (neat,  $\text{cm}^{-1}$ ):  $\nu = 2923, 2853, 1781, 1716, 1451, 1371, 1314, 1271, 1173, 1110, 1071, 1040, 1026, 950, 713$ . **HRMS** (ESI):  $m/z$  319.1176 calc. for  $\text{C}_{17}\text{H}_{19}\text{O}_6^+$   $[\text{M}+\text{H}]^+$ , found 319.1177.

| <b><math>^1\text{H}</math> NMR</b> (500 MHz, $\text{CDCl}_3$ ) |                                     | <b><math>^{13}\text{C}</math> NMR</b> (125 MHz, $\text{CDCl}_3$ ) |                  |
|----------------------------------------------------------------|-------------------------------------|-------------------------------------------------------------------|------------------|
| Natural Product                                                | Synthetic Sample                    | Natural Product                                                   | Synthetic Sample |
| 2.20 (s, 3H)                                                   | 2.20 (s, 3H)                        | 30.9                                                              | 31.0             |
| 2.54 (m, 1H)                                                   | 2.53 (m, 1H)                        | 36.6                                                              | 36.6             |
| 2.55 (dd, 1H, $J=2.8$ Hz, 10.5 Hz)                             | 2.55 (dd, 1H, $J=2.8$ Hz, 18.4 Hz)  | 44.4                                                              | 44.4             |
| 2.96 (d, 1H, $J=17.8$ Hz)                                      | 2.96 (d, 1H, $J=17.6$ Hz)           | 46.7                                                              | 46.8             |
| 2.97 (m, 1H)                                                   | 2.94-2.98 (m, 1H)                   | 49.5                                                              | 49.5             |
| 3.34 (dd, 1H, $J=8.0$ Hz, 10.5 Hz)                             | 3.35 (dd, 1H, $J=10.6$ Hz, 18.6 Hz) | 64.9                                                              | 64.9             |
| 3.40 (d, 1H, $J=17.8$ Hz)                                      | 3.41 (d, 1H, $J=17.8$ Hz)           | 67.9                                                              | 67.9             |

|                                    |                                    |       |       |
|------------------------------------|------------------------------------|-------|-------|
| 4.03 (m, 2H)                       | 4.00-4.06 (m, 2H)                  | 114.9 | 115.0 |
| 4.19 (dd, 1H, $J=8.0$ Hz, 11.0 Hz) | 4.19 (dd, 1H, $J=8.0$ Hz, 11.0 Hz) | 128.5 | 128.6 |
| 4.30 (dd, 1H, $J=7.3$ Hz, 11.0 Hz) | 4.29 (dd, 1H, $J=7.2$ Hz, 11.0 Hz) | 129.6 | 129.5 |
| 7.47 (t, 2H, $J=8.5$ Hz)           | 7.47 (t, 2H, $J=7.6$ Hz)           | 129.6 | 129.6 |
| 7.60 (brt., 1H)                    | 7.60 (t, 1H, $J=7.6$ Hz)           | 133.4 | 133.5 |
| 8.02 (dd, 2H, $J=1.2$ Hz, 8.5 Hz)  | 8.02 (d, 2H, $J=7.8$ Hz)           | 166.3 | 166.4 |
|                                    |                                    | 174.4 | 174.5 |
|                                    |                                    | 207.1 | 204.4 |

### Diversification

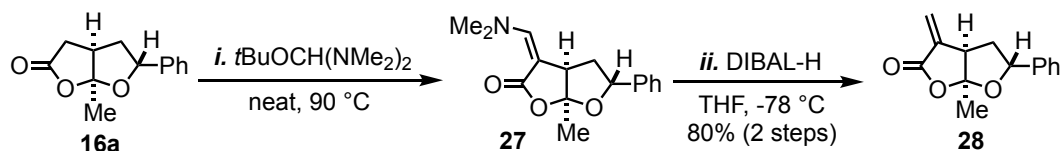

To a solution of *cis*-fused lactone **16a** (55 mg, 0.252 mmol, 1.0 equiv.) was added Brederick's reagent (219.6 mg, 1.26 mmol, 5.0 equiv.). The reaction was heated to 90 °C using an oil bath. After 4 h, the reaction was cooled to room temperature, the crude was purified by flash column (Hex/EA = 1/3) directly without work-up to give 66 mg crude product.

To a solution of the above crude enamine (61.5 mg, 0.225 mmol, 1.0 equiv.) in THF (4.5 ml, 0.05 M) at -78 °C was added DIBAL-H (2.4 equiv.) dropwise. After 1 h, the reaction was quenched with a saturated aqueous solution of  $\text{NH}_4\text{Cl}$ , extracted with EtOAc, washed with brine, dried with  $\text{Na}_2\text{SO}_4$ , and concentrated. The crude residue was purified by flash column (Hex/EA = 5/1) to give  $\alpha$ -methylene  $\gamma$ -butyrolactone **28** (42.8 mg, 80%, over 2 steps) as white solid.

**28**:  $^1\text{H}$  NMR (500 MHz,  $\text{CDCl}_3$ )  $\delta$  7.40 – 7.28 (m, 5H), 6.42 (d,  $J = 2.6$  Hz, 1H), 5.78 (d,  $J = 2.2$  Hz, 1H), 5.03 (dd,  $J = 11.1, 5.0$  Hz, 1H), 3.49 (dd,  $J = 8.8, 1.8$  Hz, 1H), 2.39 – 2.21 (m, 2H), 1.79 (s, 3H).  $^{13}\text{C}$  NMR (125 MHz,  $\text{CDCl}_3$ )  $\delta$  168.7, 139.6, 138.7, 128.6, 128.3, 126.0, 124.4, 113.9, 80.3, 48.7, 43.6, 24.6. IR (neat,  $\text{cm}^{-1}$ ):  $\nu = 2937, 1762, 1276, 1125, 1067, 927, 913, 872, 759, 700$ . HRMS (ESI):  $m/z$  231.1016 calc. for  $\text{C}_{14}\text{H}_{15}\text{O}_3^+ [\text{M}+\text{H}]^+$ , found 231.1014.

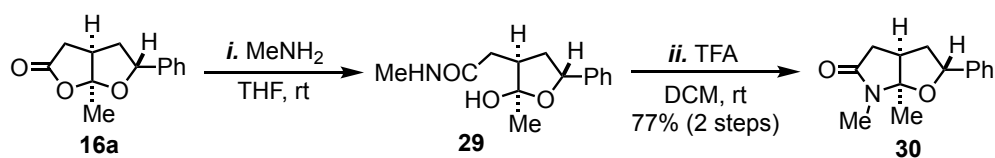

A solution of MeNH<sub>2</sub> (64.0 mg, 40 wt% in water, 2.06 mmol, 15.0 equiv) was added to *cis*-fused lactone **16a** (30.0 mg, 0.138 mmol, 1.0 equiv.) in THF (1.4 ml, 0.1 M) at room temperature. The reaction mixture was stirred at room temperature for 1 h. The resulting mixture was evaporated to dry under reduced pressure. The crude is proceeded to the next step without purification.

To a solution of the above crude (0.138 mmol, 1.0 equiv.) in DCM (1.4 ml, 0.1 M) was added TFA (21  $\mu$ l, 0.275 mmol, 2.0 equiv.) in one portion at room temperature. After the reaction was stirred at room temperature for 30 min, it was quenched with a saturated aqueous solution of NH<sub>4</sub>Cl, extracted with EtOAc, washed with brine, dried with Na<sub>2</sub>SO<sub>4</sub>, and concentrated. The crude was purified by flash column (Hex/EA = 6/1) to give lactam **30** (24.5 mg, 77%, over 2 steps) as colorless liquid.

**30**: <sup>1</sup>H NMR (500 MHz, CDCl<sub>3</sub>)  $\delta$  7.43 – 7.26 (m, 5H), 4.78 (dd, *J* = 10.9, 5.0 Hz, 1H), 2.84 (s, 3H), 2.80 (d, *J* = 6.5 Hz, 2H), 2.39 (d, *J* = 14.7 Hz, 1H), 2.21 – 2.11 (m, 1H), 2.03 (dd, *J* = 12.6, 5.0 Hz, 1H), 1.64 (s, 3H). <sup>13</sup>C NMR (125 MHz, CDCl<sub>3</sub>)  $\delta$  139.7, 128.6, 128.1, 126.1, 100.6, 79.0, 43.3, 41.5, 37.4, 24.6, 23.4. IR (neat, cm<sup>-1</sup>):  $\nu$  = 2939, 1674, 1602, 1423, 1204, 1149, 1131, 1066, 801, 756, 723, 699. HRMS (ESI): *m/z* 232.1332 calc. for C<sub>14</sub>H<sub>18</sub>NO<sub>2</sub><sup>+</sup> [M+H]<sup>+</sup>, found 232.1331.

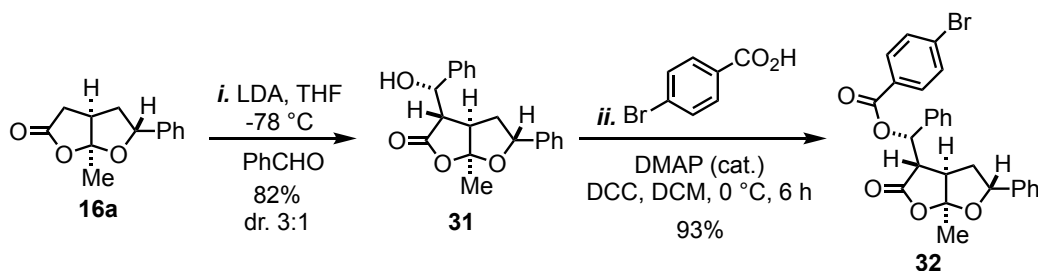

To a solution of *cis*-fused lactone **16a** (26.4 mg, 0.121 mmol, 1.0 equiv.) in THF (1.2 ml, 0.1 M) at -78 °C was added 1.0 M LDA (0.145 ml, 0.145 mmol, 1.2 equiv.) dropwise. After 30 min, benzaldehyde (15  $\mu$ l, 0.145 mmol, 1.2 equiv.) was added dropwise at -78 °C and the reaction was stirred at this temperature for 1.5 h. The reaction was quenched with a saturated aqueous solution of NH<sub>4</sub>Cl and extracted with EtOAc. The combined organic layers were washed with brine and evaporated. The residue was purified via flash column (Hex:EA = 5:1) to give aldol product **31** (dr. 3:1, separable, total 32.0 mg, 82%) as white solid.

**31, major diastereomer**: <sup>1</sup>H NMR (500 MHz, CDCl<sub>3</sub>)  $\delta$  7.43 – 7.36 (m, 4H), 7.32 – 7.24 (m, 6H), 5.49 (dd, *J* = 4.8, 2.4 Hz, 1H), 5.03 (dd, *J* = 11.5, 4.5 Hz, 1H), 3.10 – 2.97 (m, 2H), 2.70 (d, *J* = 4.7 Hz, 1H), 2.00 – 1.87 (m, 1H), 1.73 (s, 3H), 1.61 (dd, *J* = 12.9, 4.6 Hz, 1H). <sup>13</sup>C NMR (125 MHz, CDCl<sub>3</sub>)  $\delta$  176.3, 141.0, 138.8, 128.8, 128.5, 128.2, 128.0, 126.0, 125.3, 116.4, 80.4, 71.6, 56.9, 43.7, 42.1, 24.5. IR (neat, cm<sup>-1</sup>):  $\nu$  = 3478, 3033, 2934, 1759, 1453, 1389, 1266, 1128, 1091, 905, 760, 700. HRMS (ESI): *m/z* 347.1254 calc. for C<sub>20</sub>H<sub>20</sub>NaO<sub>4</sub><sup>+</sup> [M+Na]<sup>+</sup>, found 347.1250.

**31a, minor diastereomer:**  $^1\text{H NMR}$  (500 MHz,  $\text{CDCl}_3$ )  $\delta$  7.47 – 7.36 (m, 4H), 7.36 – 7.26 (m, 5H), 7.25 (s, 1H), 5.07 (td,  $J$  = 10.0, 8.7, 2.9 Hz, 2H), 3.65 (d,  $J$  = 1.7 Hz, 1H), 3.10 (dd,  $J$  = 7.8, 5.6 Hz, 1H), 2.70 (dd,  $J$  = 8.4, 5.5 Hz, 1H), 1.96 (ddd,  $J$  = 13.0, 11.4, 8.3 Hz, 1H), 1.77 (dd,  $J$  = 13.0, 4.6 Hz, 1H), 1.45 (s, 3H).  $^{13}\text{C NMR}$  (125 MHz,  $\text{CDCl}_3$ )  $\delta$  176.6, 139.6, 138.6, 128.9, 128.8, 128.6, 128.3, 126.7, 126.0, 116.0, 80.6, 74.4, 55.3, 46.3, 41.7, 24.8. **IR** (neat,  $\text{cm}^{-1}$ ):  $\nu$  = 3478, 3033, 2934, 1759, 1453, 1389, 1266, 1128, 1091, 905, 760, 700. **HRMS** (ESI):  $m/z$  347.1254 calc. for  $\text{C}_{20}\text{H}_{20}\text{NaO}_4^+$   $[\text{M}+\text{Na}]^+$ , found 347.1250.

To a mixture of the major diastereomer of aldol product **31** (30.0 mg, 0.093 mmol, 1.0 equiv.), DMAP (1.0 mg), 4-bromo benzoic acid (20.5 mg, 0.102 mmol, 1.1 equiv.) was added  $\text{CH}_2\text{Cl}_2$  (0.93 ml, 0.1 M). DCC (22.0 mg, 0.107 mmol, 1.15 equiv.) were sequentially added to the solution at 0 °C. The resulting mixture was stirred at 0 °C for 6 h before it was quenched with water. The layers were separated, and the aqueous layer was extracted with  $\text{CH}_2\text{Cl}_2$ . The combined organic layers were dried with  $\text{Na}_2\text{SO}_4$  and concentrated under reduced pressure. The residue was purified by flash column (Hex/EA = 8/1) to give **32** (43.5 mg, 93%) as white solid.

**32:**  $^1\text{H NMR}$  (500 MHz,  $\text{CDCl}_3$ )  $\delta$  7.99 – 7.87 (m, 2H), 7.68 – 7.59 (m, 2H), 7.42 – 7.26 (m, 10H), 6.55 (d,  $J$  = 3.5 Hz, 1H), 5.07 (dd,  $J$  = 11.4, 4.4 Hz, 1H), 3.29 (dd,  $J$  = 5.7, 3.5 Hz, 1H), 3.17 (dd,  $J$  = 8.2, 5.8 Hz, 1H), 2.05 (ddd,  $J$  = 12.9, 11.4, 8.3 Hz, 1H), 1.77 (dd,  $J$  = 13.0, 4.5 Hz, 1H), 1.66 (s, 3H).  $^{13}\text{C NMR}$  (125 MHz,  $\text{CDCl}_3$ )  $\delta$  173.6, 164.3, 138.4, 137.0, 132.0, 131.1, 129.1, 128.8, 128.6, 128.4, 128.4, 126.0, 125.7, 115.4, 80.4, 74.2, 54.6, 45.2, 42.1, 25.1. **IR** (neat,  $\text{cm}^{-1}$ ):  $\nu$  = 2243, 2072, 1974, 1771, 1728, 1590, 1300, 1266, 1092, 1012, 755, 699. **HRMS** (ESI):  $m/z$  529.0621/531.0601 calc. for  $\text{C}_{27}\text{H}_{23}\text{BrNaO}_5^+$   $[\text{M}+\text{Na}]^+$ , found 529.0620/531.0603.

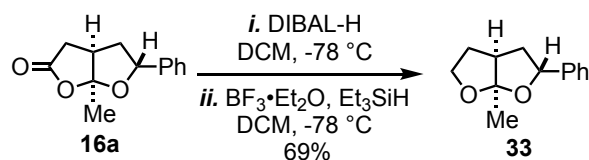

To a solution of *cis*-fused lactone **16a** (41.5 mg, 0.19 mmol, 1.0 equiv.) in anhydrous  $\text{CH}_2\text{Cl}_2$  (1.9 ml, 0.1 M) was added 1.0 M DIBAL-H solution in toluene (0.21 mL, 0.21 mmol, 1.1 equiv.) at -78 °C. The reaction mixture was stirred for 30 min and the progress of the reaction was monitored by TLC. After the reaction was over, a saturated solution of sodium potassium tartrate was added. The reaction was allowed to stir for 4-6 h till a clear separation of organic and aqueous layers resulted. The organic layer was separated and aqueous layer was further extracted with  $\text{CH}_2\text{Cl}_2$ . The combined organic layers were dried over  $\text{Na}_2\text{SO}_4$  and evaporated under vacuum. The residue obtained was purified by column chromatography (Hex/EA = 1/1) to yield a hemiacetal (43.3 mg, quant.) as colorless oil.

To a solution of the above hemiacetal (15.9 mg, 0.723 mmol, 1.0 equiv.) in anhydrous CH<sub>2</sub>Cl<sub>2</sub> (5 mL) at 0 °C, triethylsilane (35 µl, 0.217 mmol, 3.0 equiv.) was added and the reaction mixture was cooled to -78 °C. A solution of BF<sub>3</sub> etherate (18 µl, 0.145 mmol, 2.0 equiv.) was added slowly to the reaction mixture and the reaction was allowed to raise to room temperature. After completion, a saturated solution of sodium bicarbonate was added. The mixture was extracted with CH<sub>2</sub>Cl<sub>2</sub>. The combined organic layers were washed with brine, dried over Na<sub>2</sub>SO<sub>4</sub>. The organic solvent was removed by rotatory evaporation. The residue was purified by column chromatography on silica gel with (Hex/EA = 2:1) to yield **33** (10.1 mg, 69%) as colorless oil.

**33:** <sup>1</sup>H NMR (500 MHz, CDCl<sub>3</sub>) δ 7.35 – 7.26 (m, 5H), 5.16 (dd, *J* = 10.6, 5.6 Hz, 1H), 4.09 (td, *J* = 8.6, 6.7 Hz, 1H), 3.94 (ddd, *J* = 9.0, 7.9, 4.4 Hz, 1H), 2.69 (d, *J* = 4.1 Hz, 1H), 2.34 – 2.25 (m, 1H), 2.16 (ddd, *J* = 12.8, 5.6, 1.7 Hz, 1H), 2.12 – 2.05 (m, 1H), 1.91 – 1.85 (m, 1H), 1.63 (s, 3H). <sup>13</sup>C NMR (125 MHz, CDCl<sub>3</sub>) δ 141.8, 128.4, 127.5, 125.8, 116.7, 81.0, 68.2, 47.1, 42.4, 33.1, 24.5. IR (neat, cm<sup>-1</sup>): ν = 2926, 2854, 1452, 1380, 1108, 1016, 755, 699. HRMS (ESI): *m/z* 203.1068 calc. for C<sub>13</sub>H<sub>15</sub>O<sub>2</sub><sup>+</sup> [M-H]<sup>+</sup>, found 203.1067.

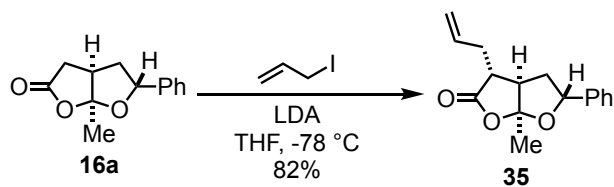

To a solution of *cis*-fused lactone **16a** (24.0 mg, 0.11 mmol, 1.0 equiv.) in THF (0.1 M) at -78 °C was added 1.0 M LDA (0.22 mmol, 2.0 equiv.) dropwise. After 1 h, allyl iodide (25 µl, 0.275 mmol, 2.5 equiv.) was added over 5 min at -78 °C and the reaction was stirred at this temperature for 1 h before it was quenched with a saturated solution of NH<sub>4</sub>Cl and extracted with EtOAc. The combined organic layer was washed with brine and evaporated. The residue was purified via flash column (Hex/EA = 3/1) to give **35** (23.4 mg, 82%) as colorless liquid.

**35:** <sup>1</sup>H NMR (500 MHz, CDCl<sub>3</sub>) δ 7.40 – 7.29 (m, 5H), 5.85 – 5.71 (m, 1H), 5.24 – 5.14 (m, 2H), 5.12 (dd, *J* = 10.6, 5.3 Hz, 1H), 2.84 – 2.70 (m, 2H), 2.70 – 2.59 (m, 1H), 2.48 – 2.39 (m, 1H), 2.24 – 2.09 (m, 2H), 1.76 (s, 3H). <sup>13</sup>C NMR (125 MHz, CDCl<sub>3</sub>) δ 176.9, 139.0, 133.8, 128.6, 128.3, 126.0, 118.9, 115.4, 80.5, 48.7, 48.0, 42.0, 36.0, 25.4. IR (neat, cm<sup>-1</sup>): ν = 2936, 2040, 2025, 1769, 1388, 1289, 1264, 1134, 1093, 998, 920, 700. HRMS (ESI): *m/z* 259.1329 calc. for C<sub>16</sub>H<sub>19</sub>O<sub>3</sub><sup>+</sup> [M+H]<sup>+</sup>, found 259.1328.

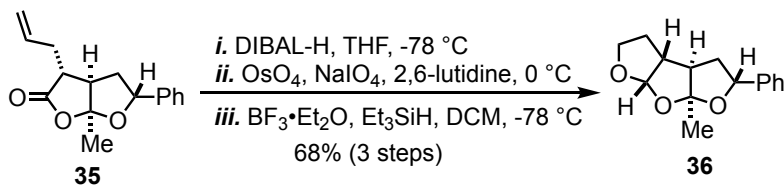

To a solution of **35** (55.3 mg, 0.214 mmol, 1.0 equiv.) in DCM (2.1 ml) was added 1.0 M DIBAL-H (1.15 equiv.) in toluene at -78 °C. The reaction mixture was stirred for 1 h followed by quenching with a saturated solution of sodium potassium tartrate. After stirring another 2 h, the organic layer was separated and the aqueous layer was further extracted with DCM. The combined organic layer was washed with brine and dried over Na<sub>2</sub>SO<sub>4</sub>, and evaporated. The crude was used in the next step without purification.

To a solution of the above crude product in dioxane: water mixture (3:1, v/v; 3 mL) at 0 °C was added 2,6-lutidine (25 µl, 0.214 mmol, 1.0 equiv.) and an OsO<sub>4</sub> solution in water (5 mg/ml, 0.00214 mmol, 0.01 equiv.) followed by NaIO<sub>4</sub> (137 mg, 0.214 mmol, 3.0 equiv.) at room temperature. After 5 h, the reaction was completed and quenched with aqueous sodium thiosulfate solution. The reaction mixture was exhaustively extracted with EtOAc. The combined organic layer was dried over Na<sub>2</sub>SO<sub>4</sub>, filtered through a celite-pad, and evaporated under vacuum to yield a crude diastereomeric tricyclic hemiacetal, which was subjected to next reaction without purification.

To a solution of the above crude (21 mg, 1.0 equiv.) in anhydrous DCM (0.8 ml) at -78 °C, triethylsilane (39 µl, 0.24 mmol, 3.0 equiv.) and BF<sub>3</sub> etherate (20 µl, 0.16 mmol, 2.0 equiv.) was added slowly. After 2 h, a saturated solution of sodium bicarbonate was added to it followed by extraction with DCM. The combined organic layer was washed with brine and dried over Na<sub>2</sub>SO<sub>4</sub>. The solvent was removed by rotatory evaporation. The residue was purified via flash column (Hex:EA = 4:1) to give **36** (13.4 mg, 68%, 3 steps) as colorless oil.

**36**: <sup>1</sup>H NMR (500 MHz, CDCl<sub>3</sub>) δ 7.36 – 7.32 (m, 5H), 5.97 (d, *J* = 5.1 Hz, 1H), 5.00 (dd, *J* = 11.2, 4.8 Hz, 1H), 3.99 (td, *J* = 8.4, 2.5 Hz, 1H), 3.92 (ddd, *J* = 10.4, 8.8, 5.9 Hz, 1H), 2.78 (ddt, *J* = 8.8, 5.3, 2.7 Hz, 1H), 2.53 (dd, *J* = 8.1, 3.4 Hz, 1H), 2.19 – 2.13 (m, 2H), 2.07 (ddd, *J* = 12.6, 11.1, 8.3 Hz, 2H), 1.71 (s, 3H). <sup>13</sup>C NMR (125 MHz, CDCl<sub>3</sub>) δ 140.5, 128.4, 127.8, 126.0, 117.0, 109.4, 79.5, 66.7, 53.9, 50.5, 43.0, 33.2, 25.3. IR (neat, cm<sup>-1</sup>): ν = 2935, 2871, 1449, 1380, 1134, 1026, 989, 945, 895, 759, 700. HRMS (ESI): *m/z* 247.1329 calc. for C<sub>15</sub>H<sub>19</sub>O<sub>3</sub><sup>+</sup> [M+H]<sup>+</sup>, found 247.1327.

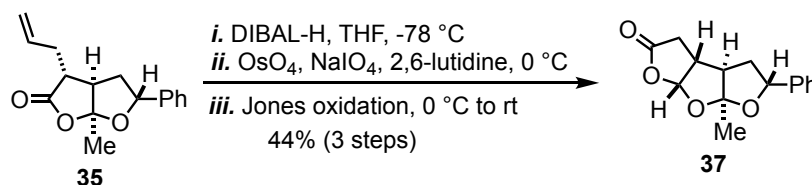

To a solution of **35** (55.3 mg, 0.214 mmol, 1.0 equiv.) in DCM (2.1 ml) was added 1.0 M DIBAL-H (1.15 equiv.) in toluene at -78 °C. The reaction mixture was stirred for 1 h followed by quenching with a saturated solution of sodium potassium tartrate. After stirring another 2 h, the organic layer was separated and the

aqueous layer was further extracted with DCM. The combined organic layer was washed with brine and dried over Na<sub>2</sub>SO<sub>4</sub> and evaporated. The crude was used to the next step without purification.

To a solution of the above crude product in dioxane/water mixture (3:1, v/v; 3 mL) at 0 °C was added 2,6-lutidine (25 µl, 0.214 mmol, 1.0 equiv.) and 5 mg/ml OsO<sub>4</sub> solution in water (0.00214 mmol, 0.01 equiv.) followed by NaIO<sub>4</sub> (137 mg, 0.214 mmol, 3.0 equiv.) at room temperature. After 5 h, the reaction was quenched with an aqueous sodium thiosulfate solution and exhaustively extracted with EtOAc. The combined organic layer was dried over Na<sub>2</sub>SO<sub>4</sub>, filtered through a celite-pad, and evaporated under vacuum to yield a crude diastereomeric tricyclic hemiacetal, which was subjected to next reaction without purification.

To a solution of the above crude product (23.0 mg, 0.088 mmol, 1.0 equiv.) in acetone (1 mL) was added dropwise 2.5 M Jones reagent (35 µl, 0.088 mmol, 1.0 equiv.) at 0 °C and the reaction mixture was gradually allowed to warm to room temperature. After 10 h, the reaction was quenched with a sat. NaHCO<sub>3</sub> solution and extracted with EtOAc. The combined organic layer was washed with brine and dried over Na<sub>2</sub>SO<sub>4</sub>, evaporated and subjected to column chromatography (Hex:EA = 3:1 to pure EtOAc) to yield tricyclic lactone **37** (9.9 mg, 44%, 3 steps) as colorless oil.

**37**: <sup>1</sup>H NMR (500 MHz, CDCl<sub>3</sub>) δ 7.38 – 7.29 (m, 5H), 6.21 (d, *J* = 5.4 Hz, 1H), 5.06 (dd, *J* = 9.1, 6.8 Hz, 1H), 3.05 (tdd, *J* = 6.9, 3.4, 1.8 Hz, 1H), 2.93 (dd, *J* = 18.1, 9.3 Hz, 1H), 2.63 (dd, *J* = 18.1, 2.5 Hz, 1H), 2.54 (q, *J* = 4.5 Hz, 1H), 2.19 – 2.13 (m, 2H), 1.74 (s, 3H). <sup>13</sup>C NMR (125 MHz, CDCl<sub>3</sub>) δ <sup>13</sup>C NMR (125 MHz, CDCl<sub>3</sub>) δ 174.0, 139.3, 128.6, 128.1, 126.0, 119.6, 107.4, 79.9, 53.6, 46.6, 42.2, 36.3, 26.1. IR (neat, cm<sup>-1</sup>): ν = 2918, 2026, 2010, 1782, 1174, 1102, 1005, 944, 886, 701. HRMS (ESI): *m/z* 261.1121 calc. for C<sub>15</sub>H<sub>17</sub>O<sub>4</sub><sup>+</sup> [M+H]<sup>+</sup>, found 261.1119.

## Part 2. X-Ray structure and analysis data.

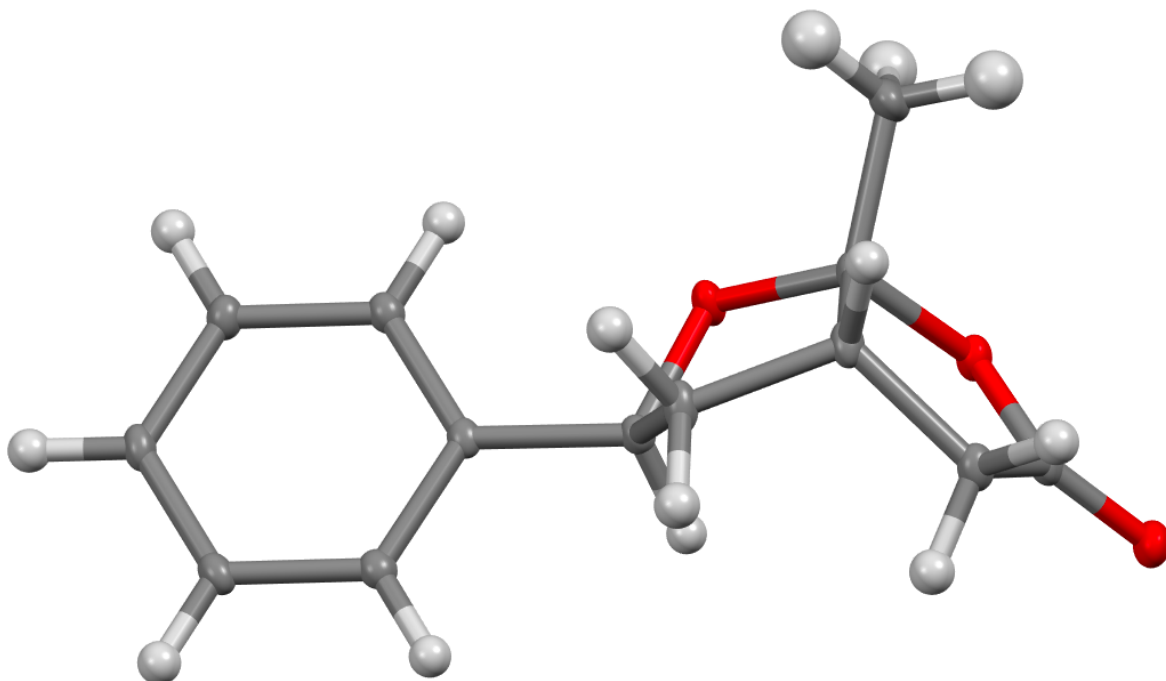

**Figure S1.** X-ray Structure of **16a**

A colorless plate shaped crystal of **16a** for X-ray diffraction was obtained by slow evaporation of a Hexanes/EtOAc solution of **16a**. The data were collected at 150(2) K on a Bruker AXS D8 Quest CMOS diffractometer with Mo sealed tube and curved triumph monochromator with a 10 cm x 10 cm Photon-100 detector and fixed chi angle. The supplementary crystallographic data was deposited in The Cambridge Crystallographic Data Centre. CCDC1997763.

### X-ray analysis data:

Bond precision: C-C = 0.0022 Å Wavelength=1.54178

Cell: a=11.8558(4) b=13.1276(4) c=7.1585(2)

alpha=90 beta=101.6907(10) gamma=90

Temperature: 150 K Calculated Reported

Volume 1091.02(6) 1091.02(6)

Space group P 21/c P 21/c

Hall group -P 2ybc -P 2ybc

Moiety formula C<sub>13</sub> H<sub>14</sub> O<sub>3</sub> ?

Sum formula C<sub>13</sub> H<sub>14</sub> O<sub>3</sub> C<sub>13</sub> H<sub>14</sub> O<sub>3</sub>

Mr 218.24 218.24

Dx,g cm-3 1.329 1.329  
Z 4 4  
Mu (mm-1) 0.766 0.766  
F000 464.0 464.0  
F000' 465.48  
h,k,lmax 14,16,8 14,16,8  
Nref 2154 2113  
Tmin,Tmax 0.752,0.948 0.510,0.754  
Tmin' 0.708  
Correction method= # Reported T Limits: Tmin=0.510  
Tmax=0.754 AbsCorr = MULTI-SCAN  
Data completeness= 0.981 Theta(max)= 72.204  
R(reflections)= 0.0516( 1968) wR2(reflections)= 0.1600( 2113)  
S = 1.107 Npar= 147

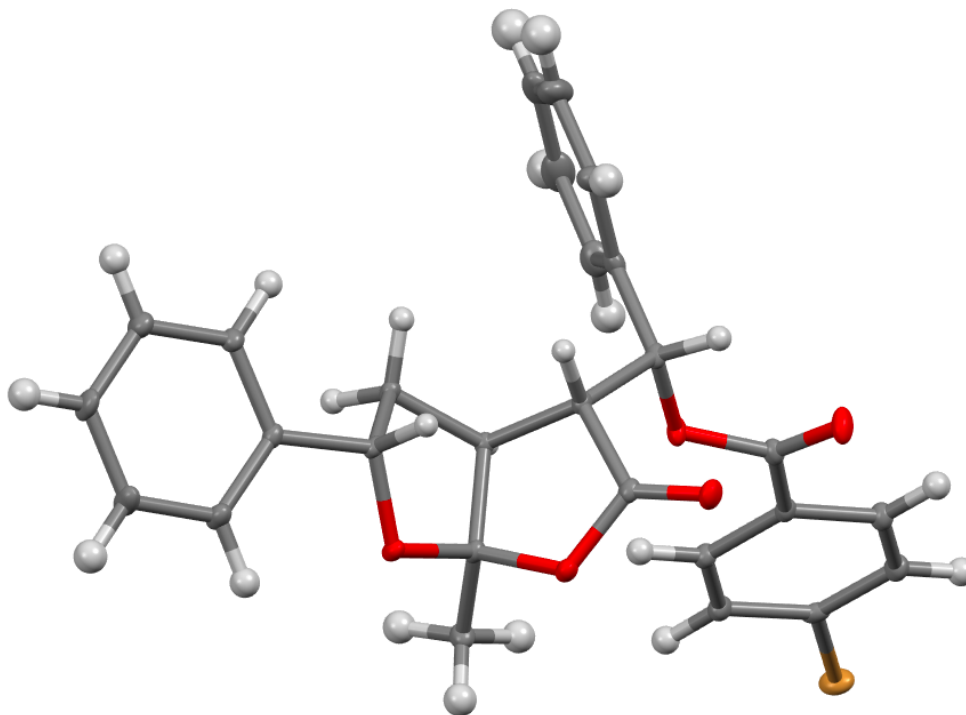

**Figure S2.** X-ray Structure of **32**

A colorless plate shaped crystal of **32** for X-ray diffraction was obtained by slow evaporation of a isopropyl alcohol/EtOAc solution of **32**. The data were collected at 150(2) K on a Bruker AXS D8 Quest CMOS diffractometer with Mo sealed tube and curved triumph monochromator with a 10 cm x 10 cm Photon-100 detector and fixed chi angle. The supplementary crystallographic data was deposited in The Cambridge Crystallographic Data Centre. CCDC 2016932.

Bond precision: C-C = 0.0048 Å Wavelength=1.54178

Cell: a=10.1739(3) b=10.3086(3) c=11.0993(3)

alpha=90 beta=95.0877(14) gamma=90

Temperature: 150 K

|                | Calculated    | Reported      |
|----------------|---------------|---------------|
| Volume         | 1159.49(6)    | 1159.49(11)   |
| Space group    | P 21          | P 21          |
| Hall group     | P 2yb         | P 2yb         |
| Moiety formula | C27 H23 Br O5 | ?             |
| Sum formula    | C27 H23 Br O5 | C27 H23 Br O5 |
| Mr             | 507.35        | 507.36        |
| Dx,g cm-3      | 1.453         | 1.453         |
| Z              | 2             | 2             |

|           |              |              |
|-----------|--------------|--------------|
| Mu (mm-1) | 2.719        | 2.719        |
| F000      | 520.0        | 520.0        |
| F000'     | 520.06       |              |
| h,k,lmax  | 12,13,14     | 12,13,14     |
| Nref      | 5037[ 2662]  | 4768         |
| Tmin,Tmax | 0.710, 0.897 | 0.624, 0.754 |
| Tmin'     | 0.568        |              |

Correction method= # Reported T Limits: Tmin=0.624 Tmax=0.754  
AbsCorr = MULTI-SCAN  
Data completeness= 1.79/0.95    Theta(max)= 79.688  
R(reflections)= 0.0268( 4561) wR2(reflections)= 0.0627( 4768)  
S = 1.062 Npar= 299

### Reference:

1. Quan, L. G.; Kim, S.-H.; Lee, J. C.; Cha, J. K. Diastereoselective Synthesis of trans-1,2-Dialkylcyclopropanols by the Kulinkovich Hydroxycyclopropanation of Homoallylic Alcohols. *Angew. Chem. Int. Ed.* **2002**, *41*, 2160-2162.
2. Sun, H.; Roush, W. S.; Hughes, D. Synthesis of (+)-B-Allyldiisopinocampheylborane and its Reaction with Aldehydes. *Org. Synth.* **2011**, *88*, 87-101.
3. Lohse-Fraefel, N.; Carreira, E. M. Polyketide Building Blocks via Diastereoselective Nitrile Oxide Cycloadditions with Homoallylic Alcohols and Monoprotected Homoallylic Diols. *Chem. Eur. J.* **2009**, *15*, 12065-12081.
4. Ueda, Y.; Abe, H.; Iguchi, K.; Ito, H. Synthetic Study of Yonarolide: Stereoselective Construction of the Tricyclic Core. *Tetrahedron Lett.* **2011**, *52*, 3379-3381.

## Part 3. $^1\text{H}$ , $^{13}\text{C}$ , and $^{19}\text{F}$ NMR spectra

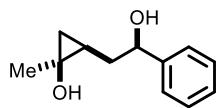

$^1\text{H}$  NMR (500 MHz,  $\text{CDCl}_3$ )

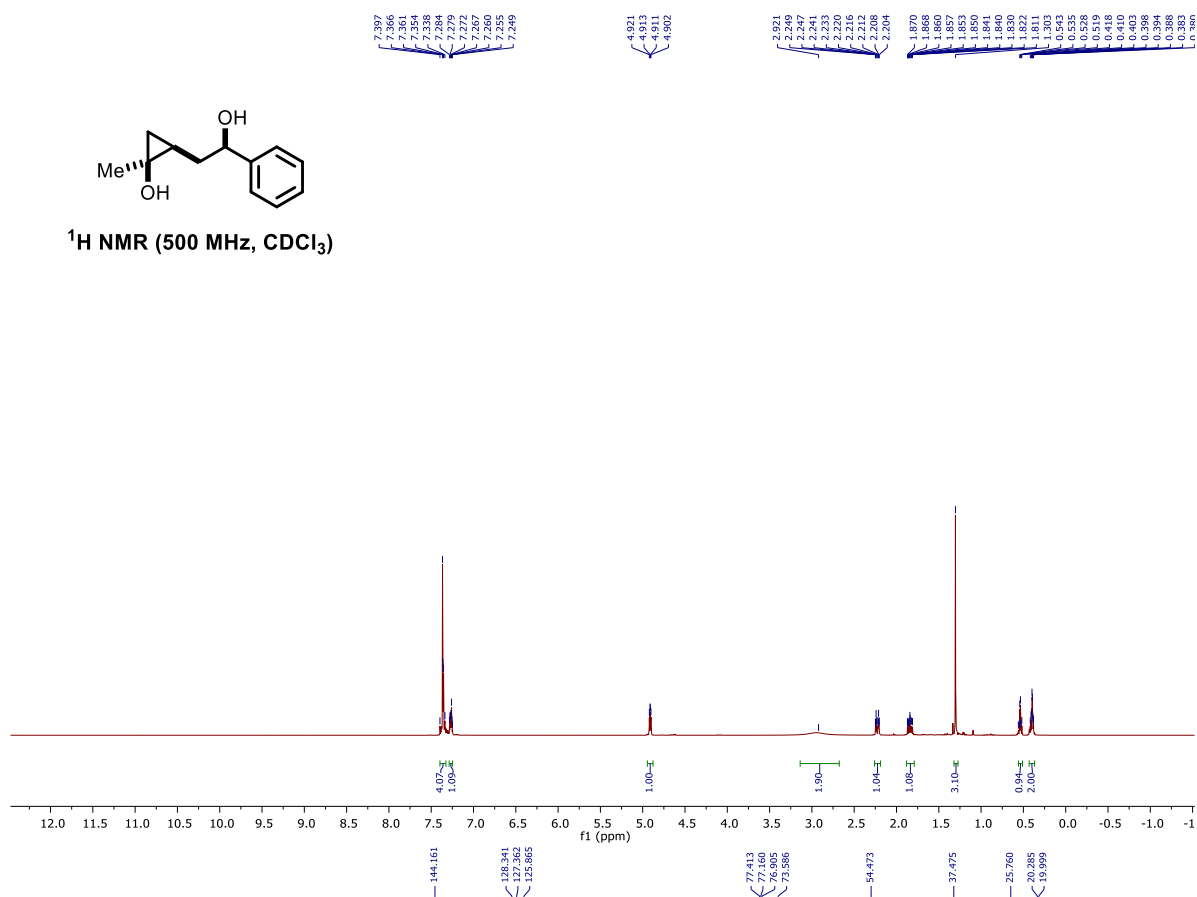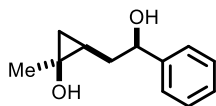

$^{13}\text{C}$  NMR (125 MHz,  $\text{CDCl}_3$ )

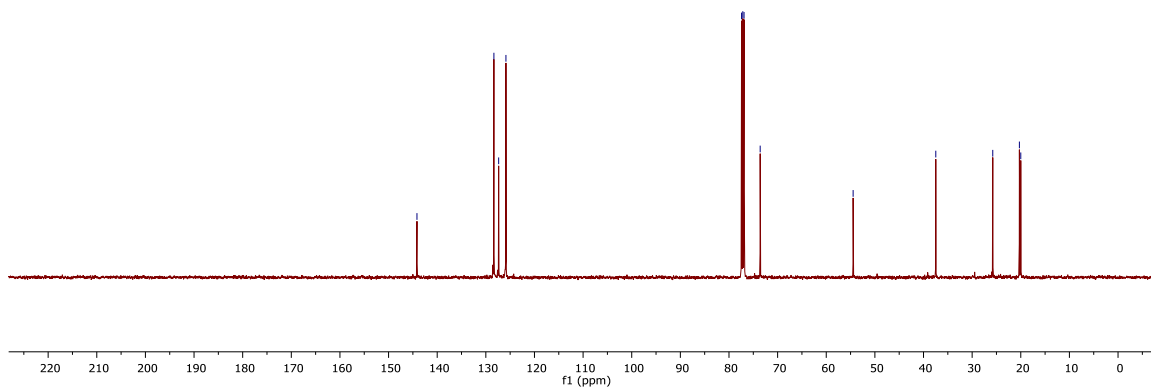

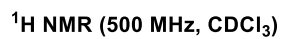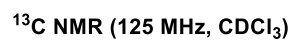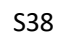

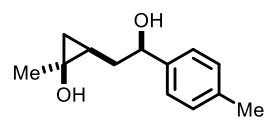

$^1\text{H}$  NMR (500 MHz,  $\text{CDCl}_3$ )

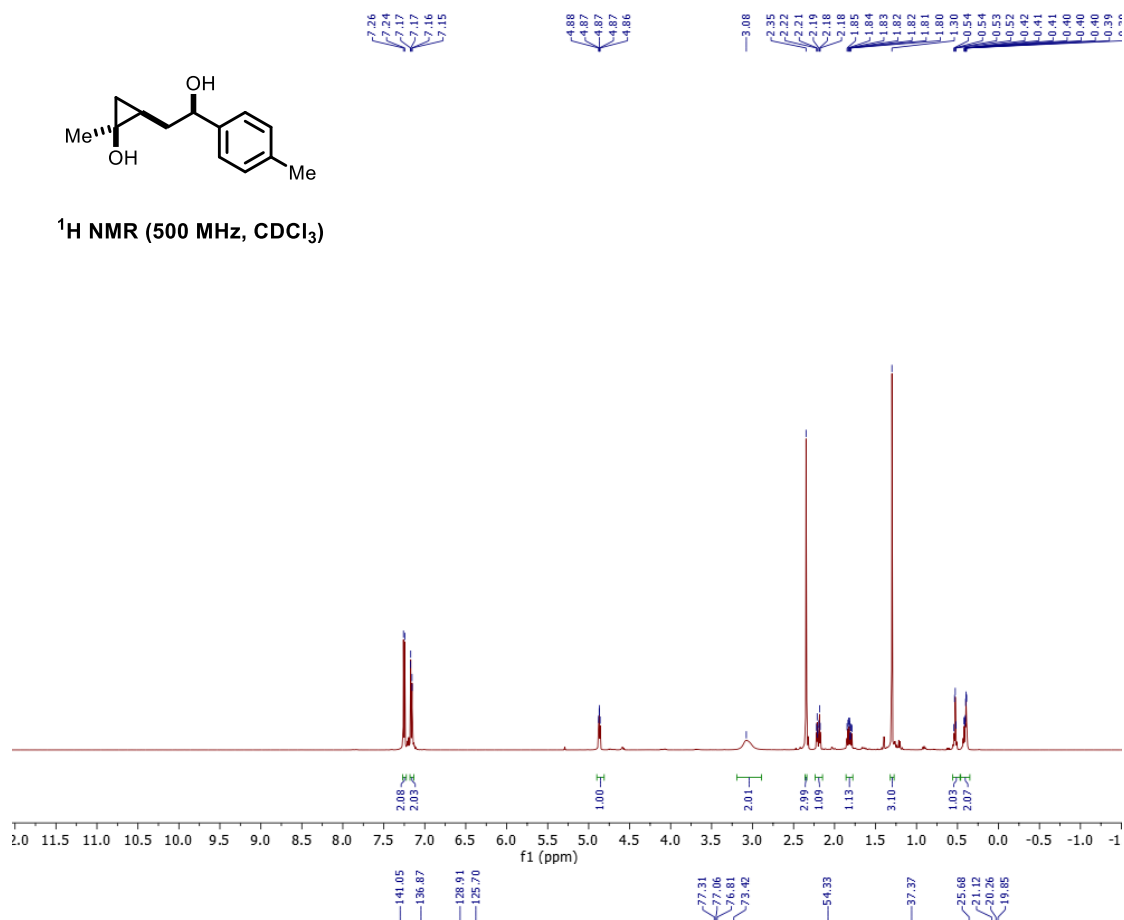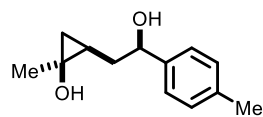

$^{13}\text{C}$  NMR (125 MHz,  $\text{CDCl}_3$ )

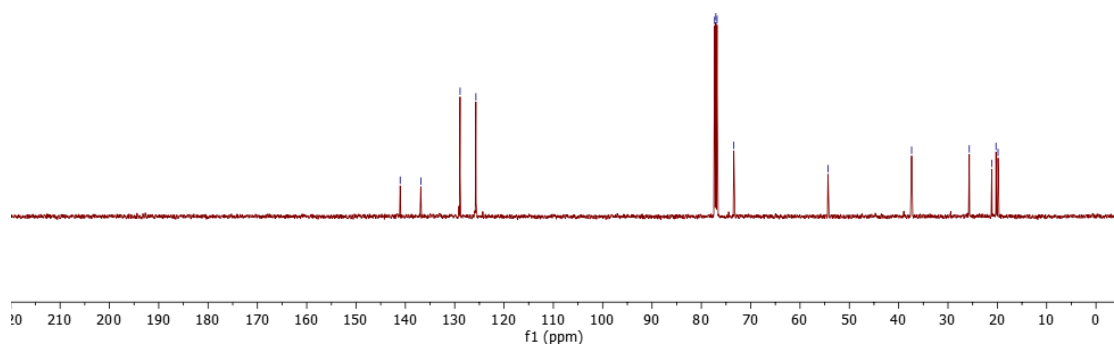

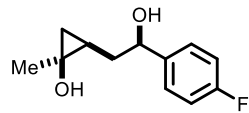

<sup>1</sup>H NMR (500 MHz, CDCl<sub>3</sub>)

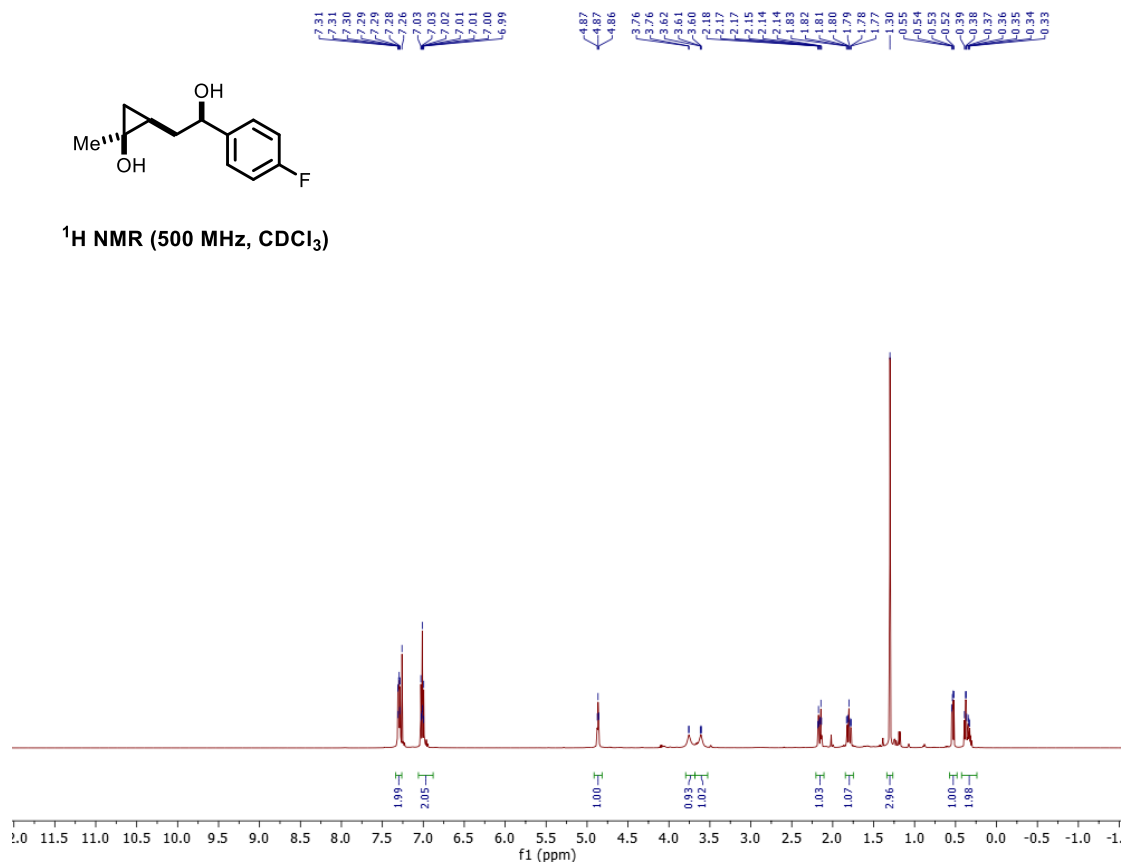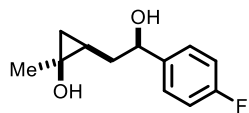

<sup>13</sup>C NMR (125 MHz, CDCl<sub>3</sub>)

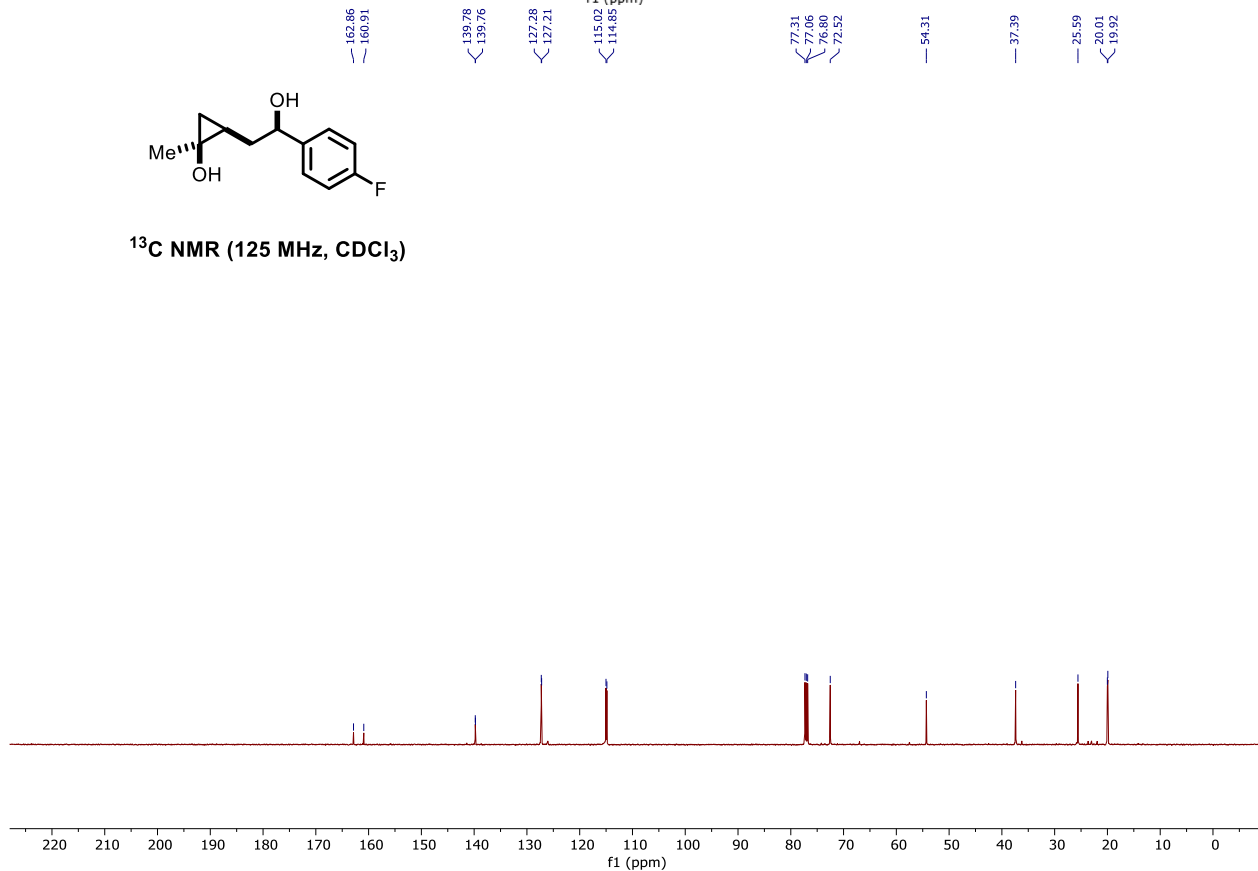

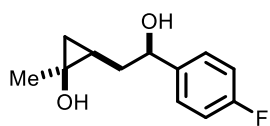

**$^{19}\text{F}$  NMR (471 MHz,  $\text{CDCl}_3$ )**

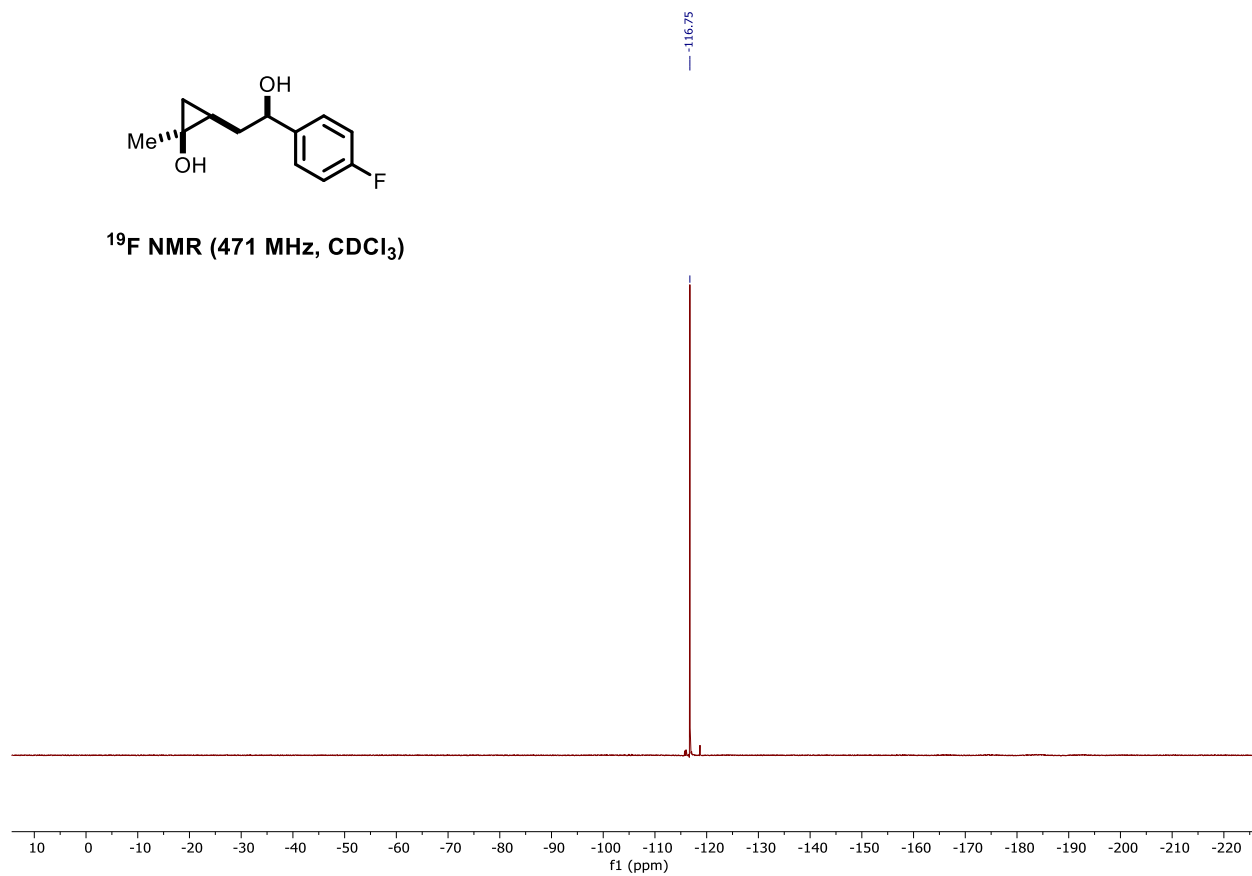

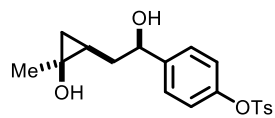

$^1\text{H}$  NMR (500 MHz,  $\text{CDCl}_3$ )

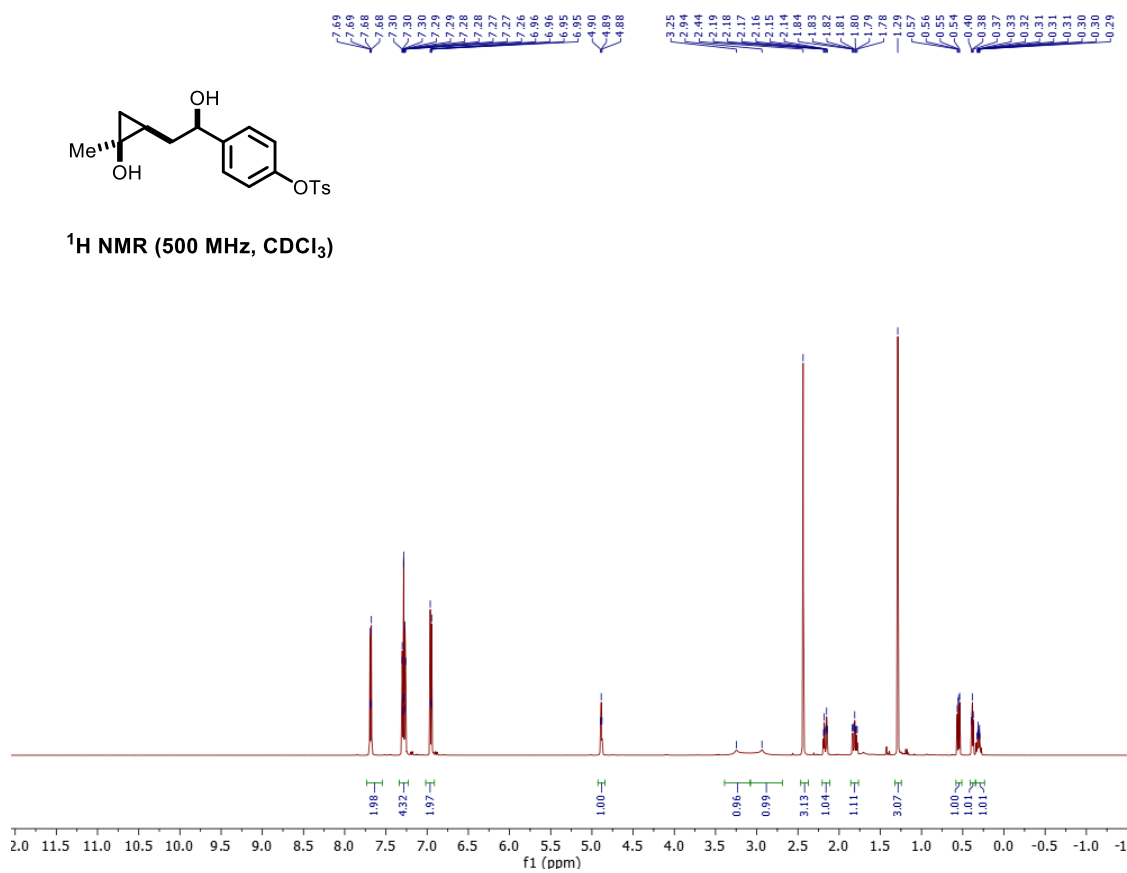

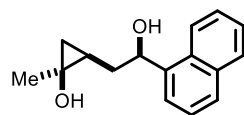

<sup>1</sup>H NMR (500 MHz, CDCl<sub>3</sub>)

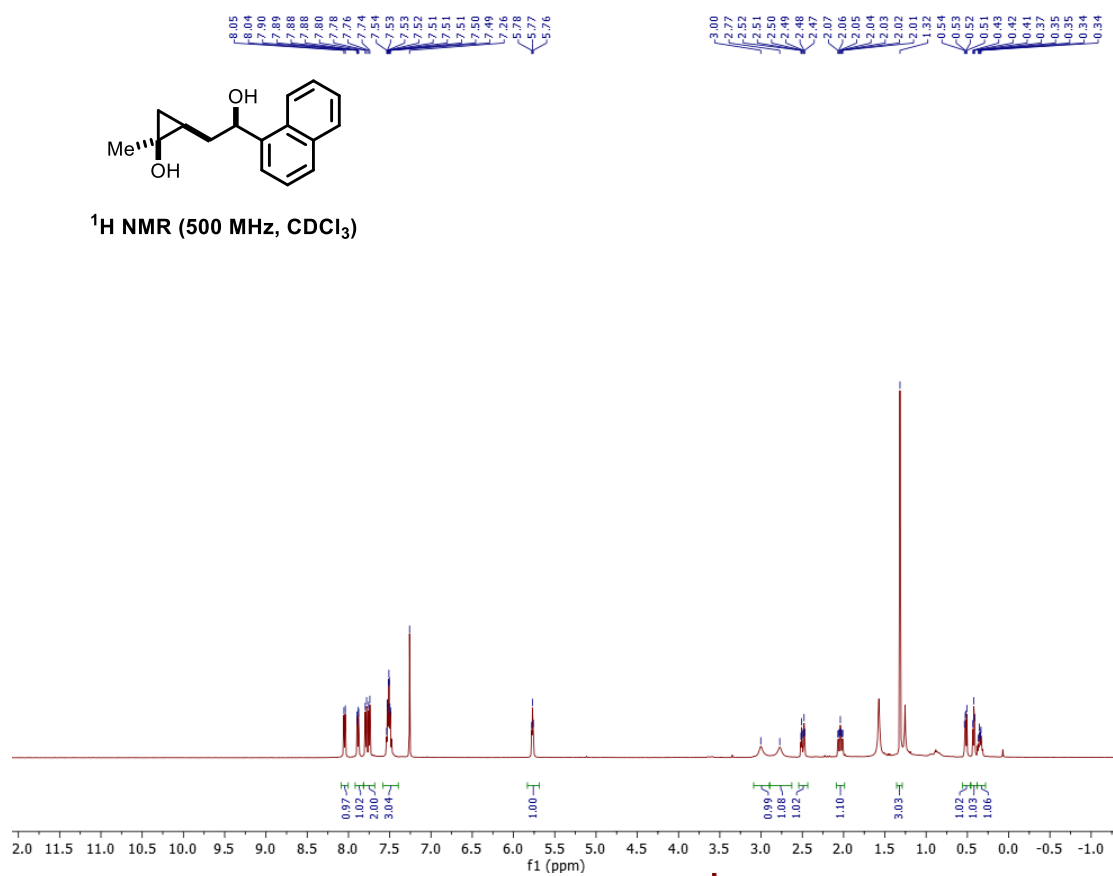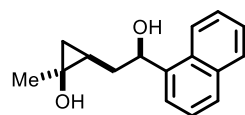

<sup>13</sup>C NMR (125 MHz, CDCl<sub>3</sub>)

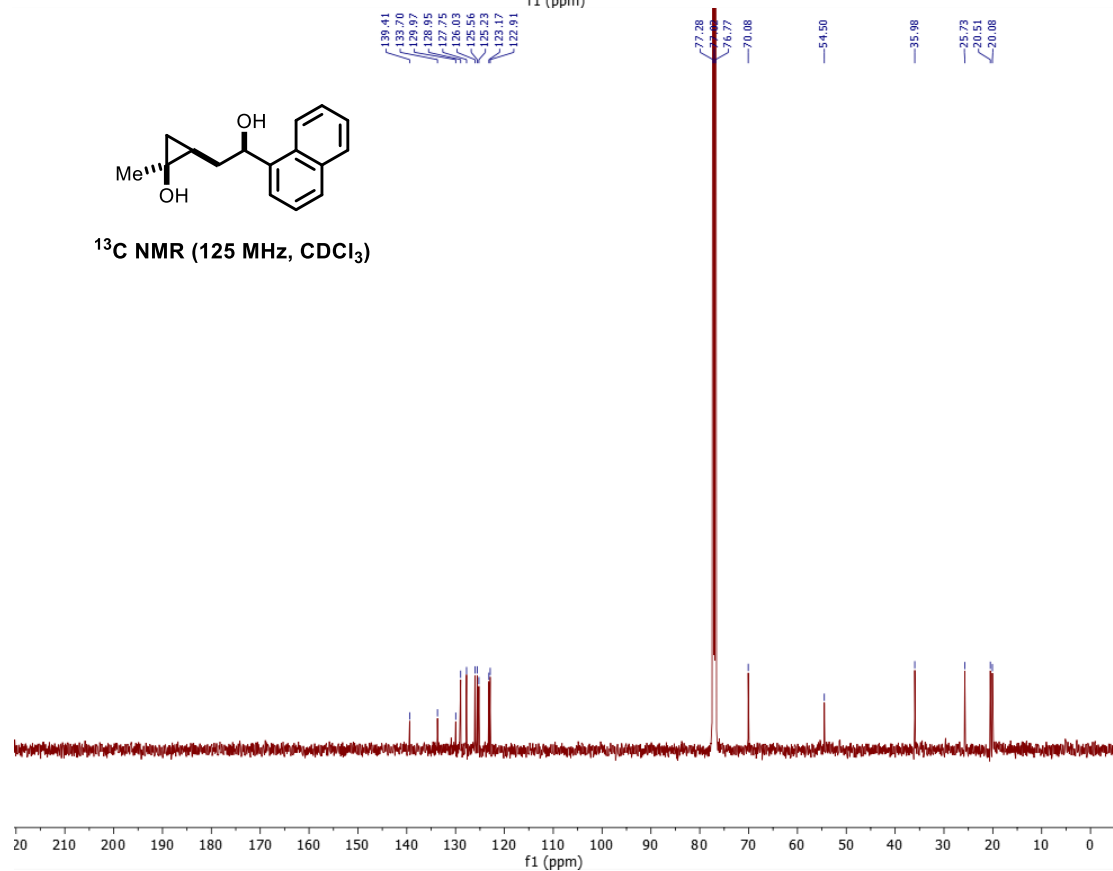

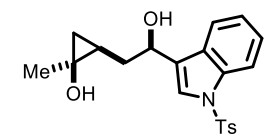

<sup>1</sup>H NMR (500 MHz, CDCl<sub>3</sub>)

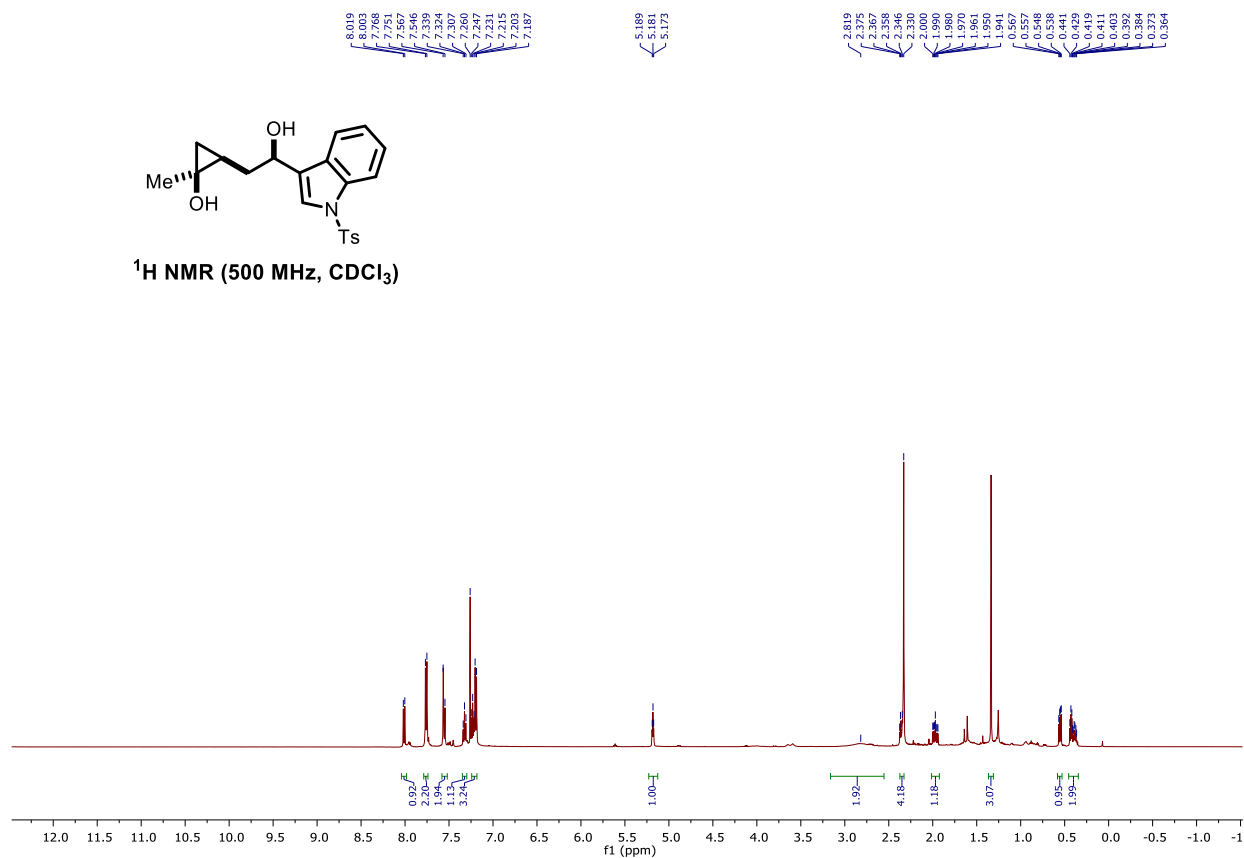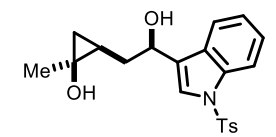

<sup>13</sup>C NMR (125 MHz, CDCl<sub>3</sub>)

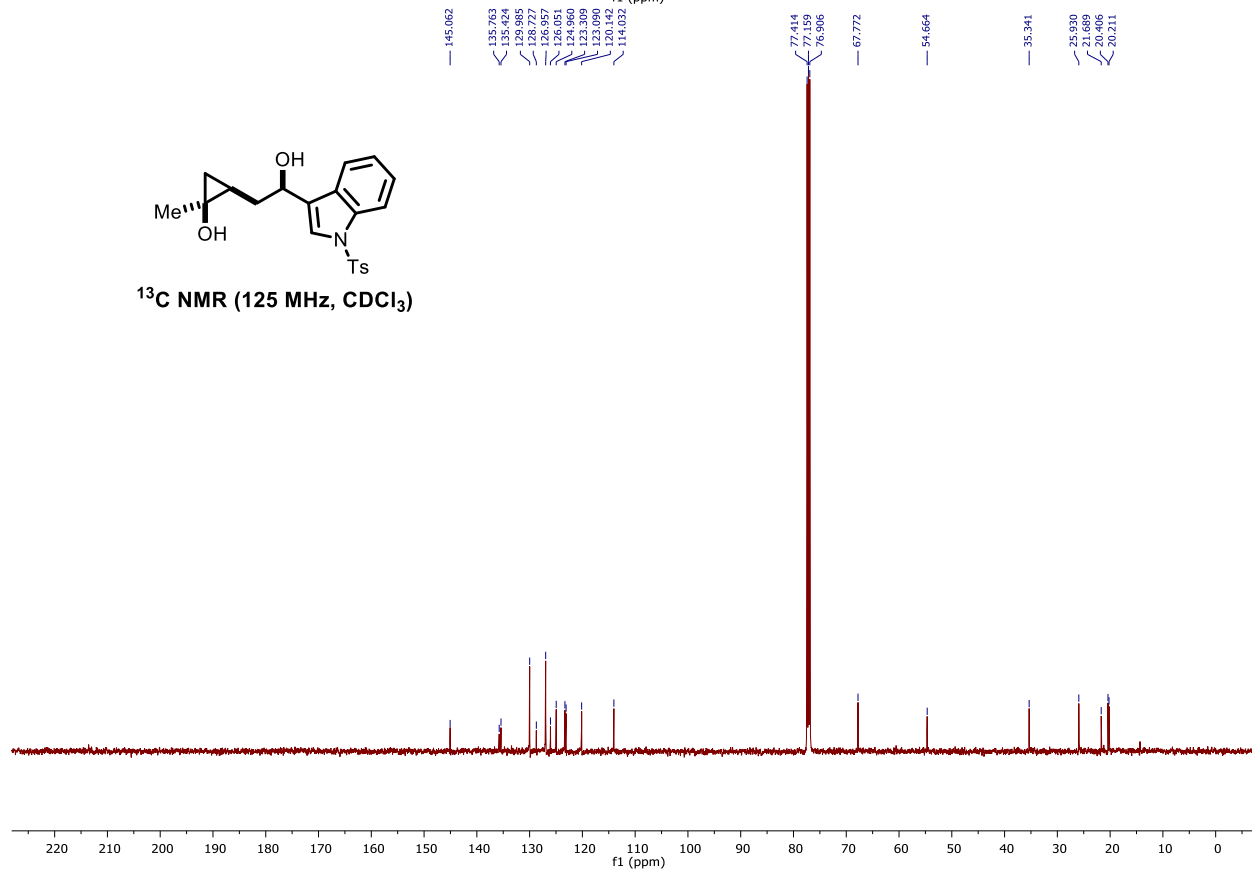

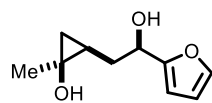

<sup>1</sup>H NMR (500 MHz, CDCl<sub>3</sub>)

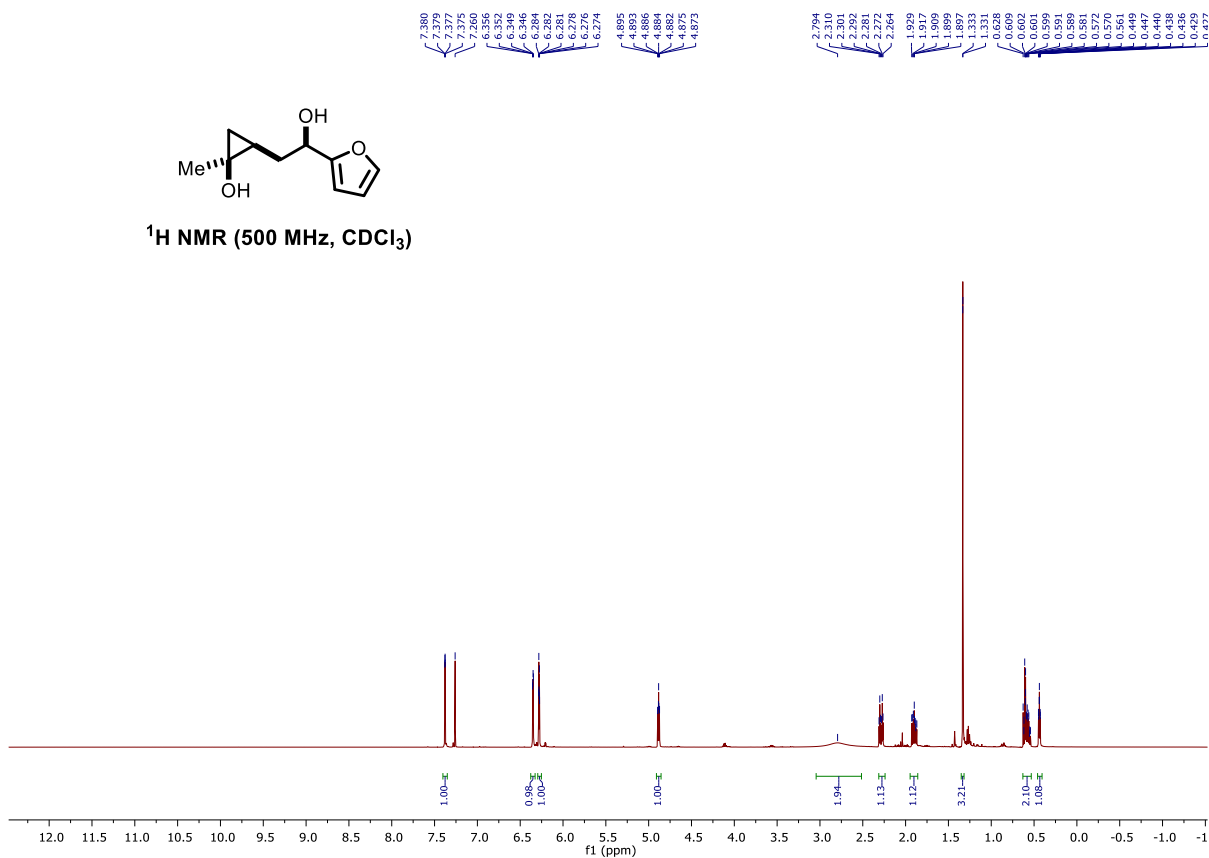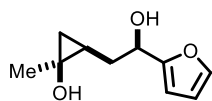

<sup>13</sup>C NMR (125 MHz, CDCl<sub>3</sub>)

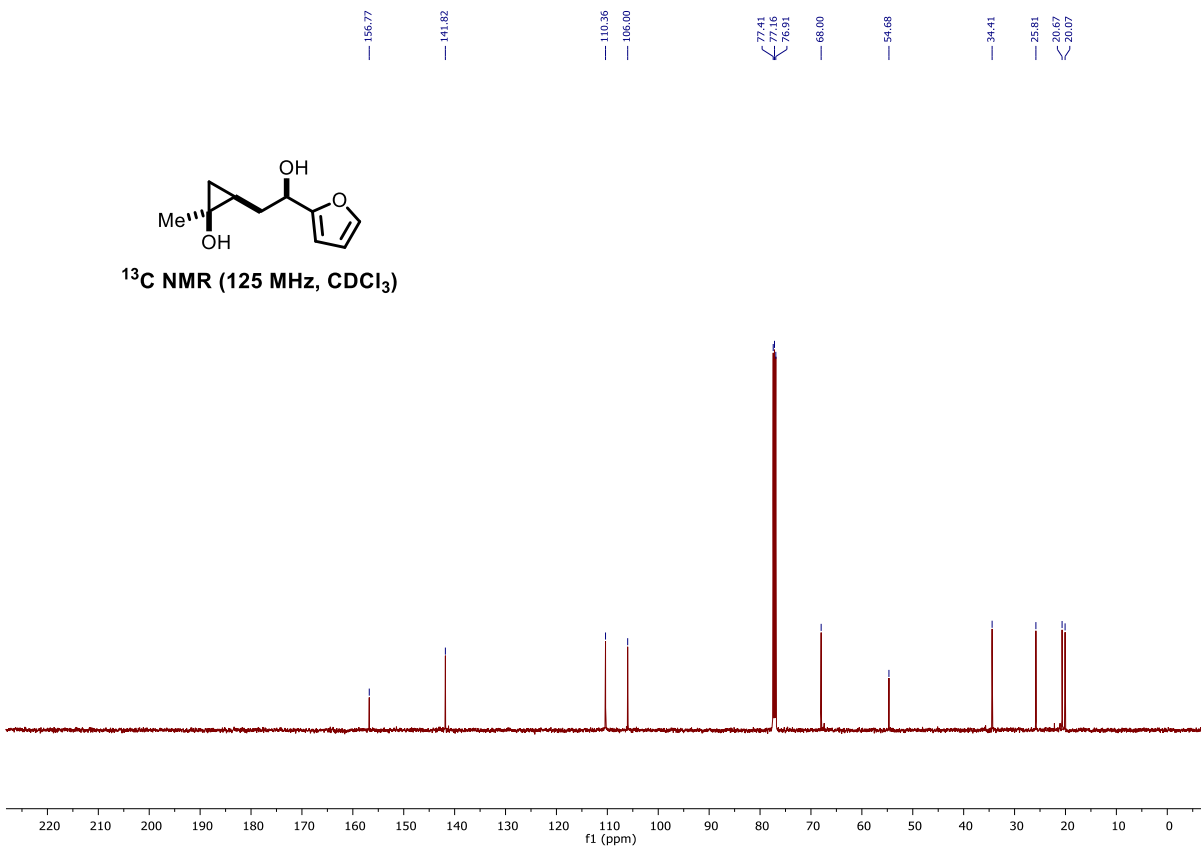

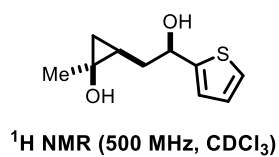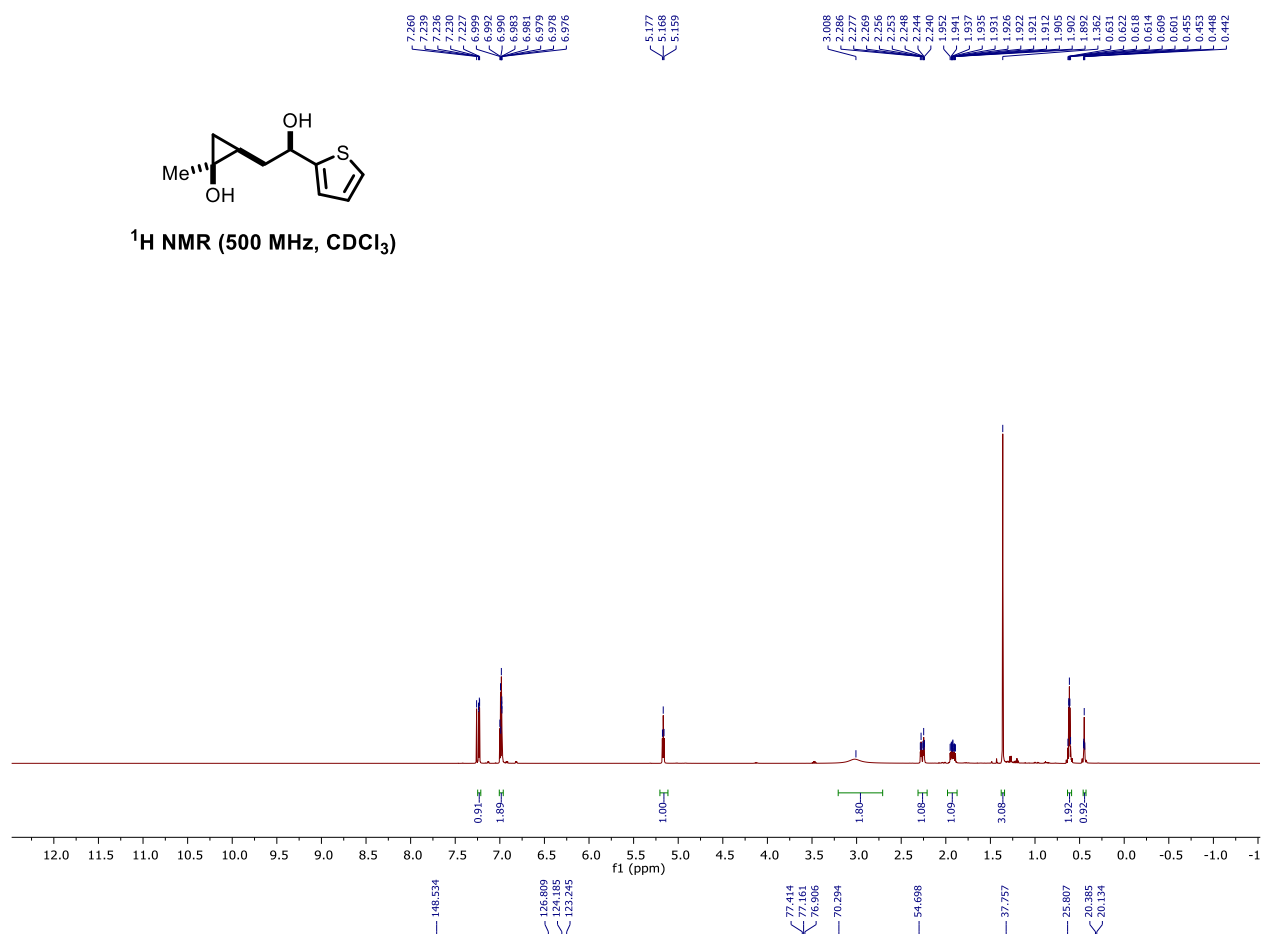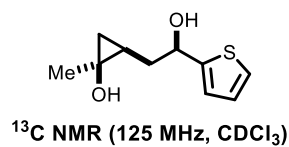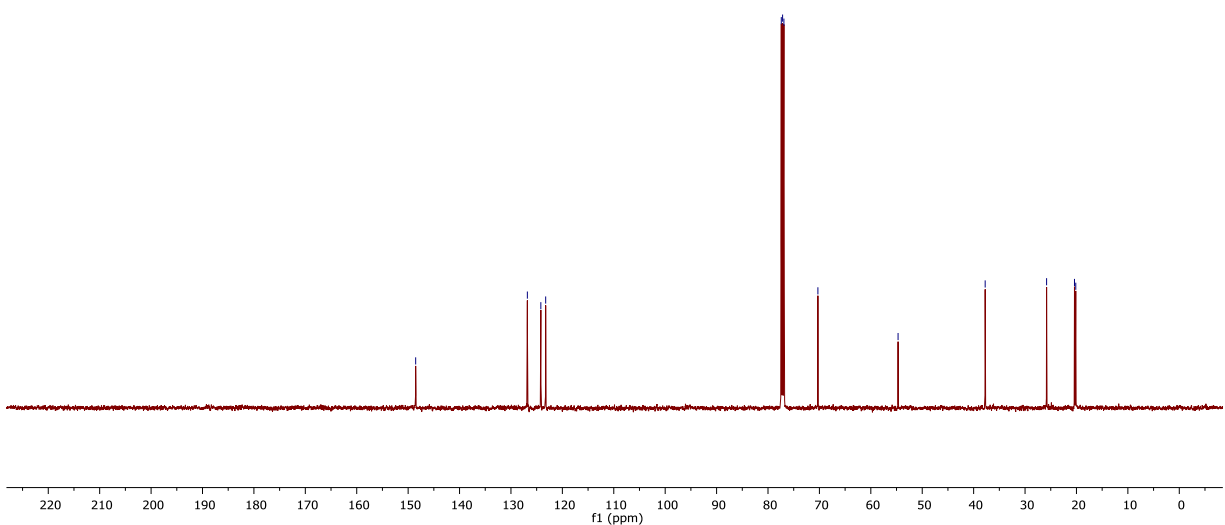

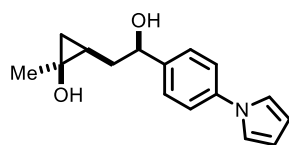

<sup>1</sup>H NMR (500 MHz, CDCl<sub>3</sub>)

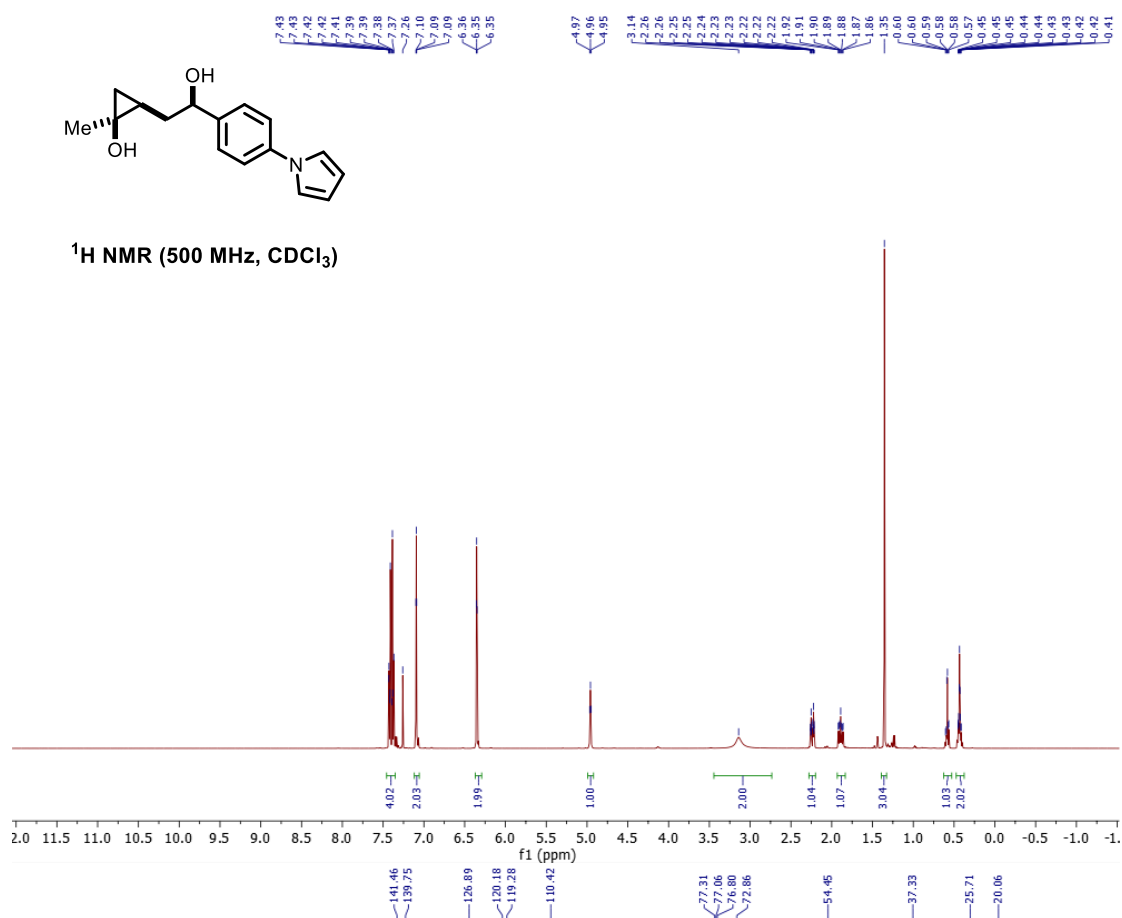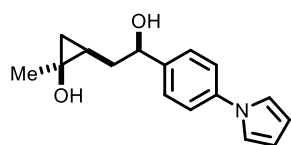

<sup>13</sup>C NMR (125 MHz, CDCl<sub>3</sub>)

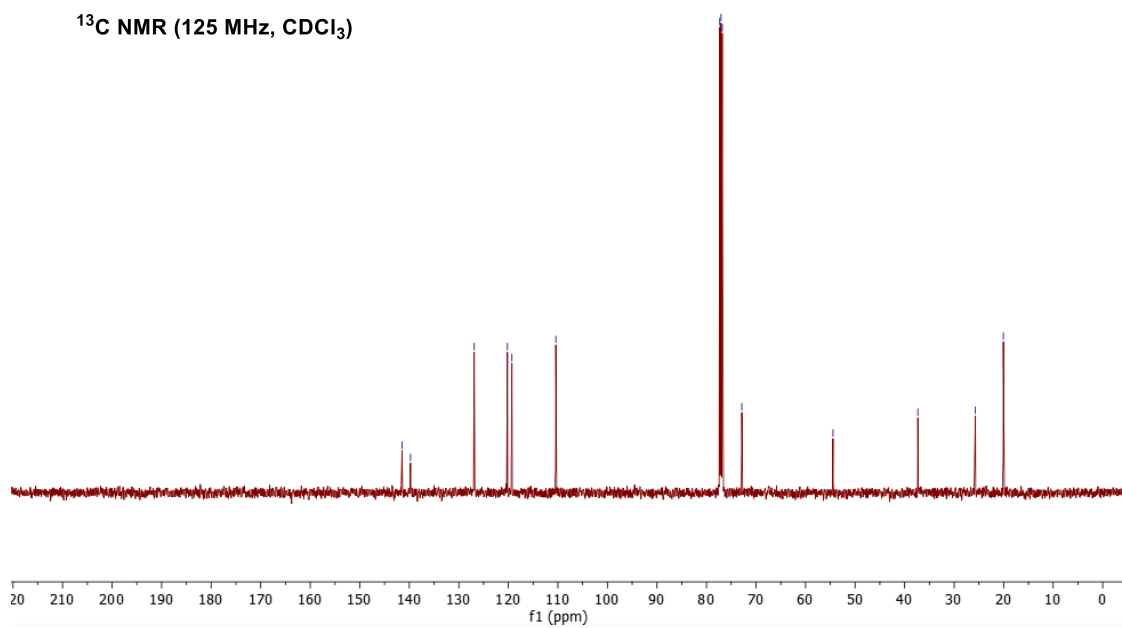

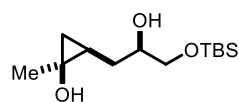

<sup>1</sup>H NMR (500 MHz, CDCl<sub>3</sub>)

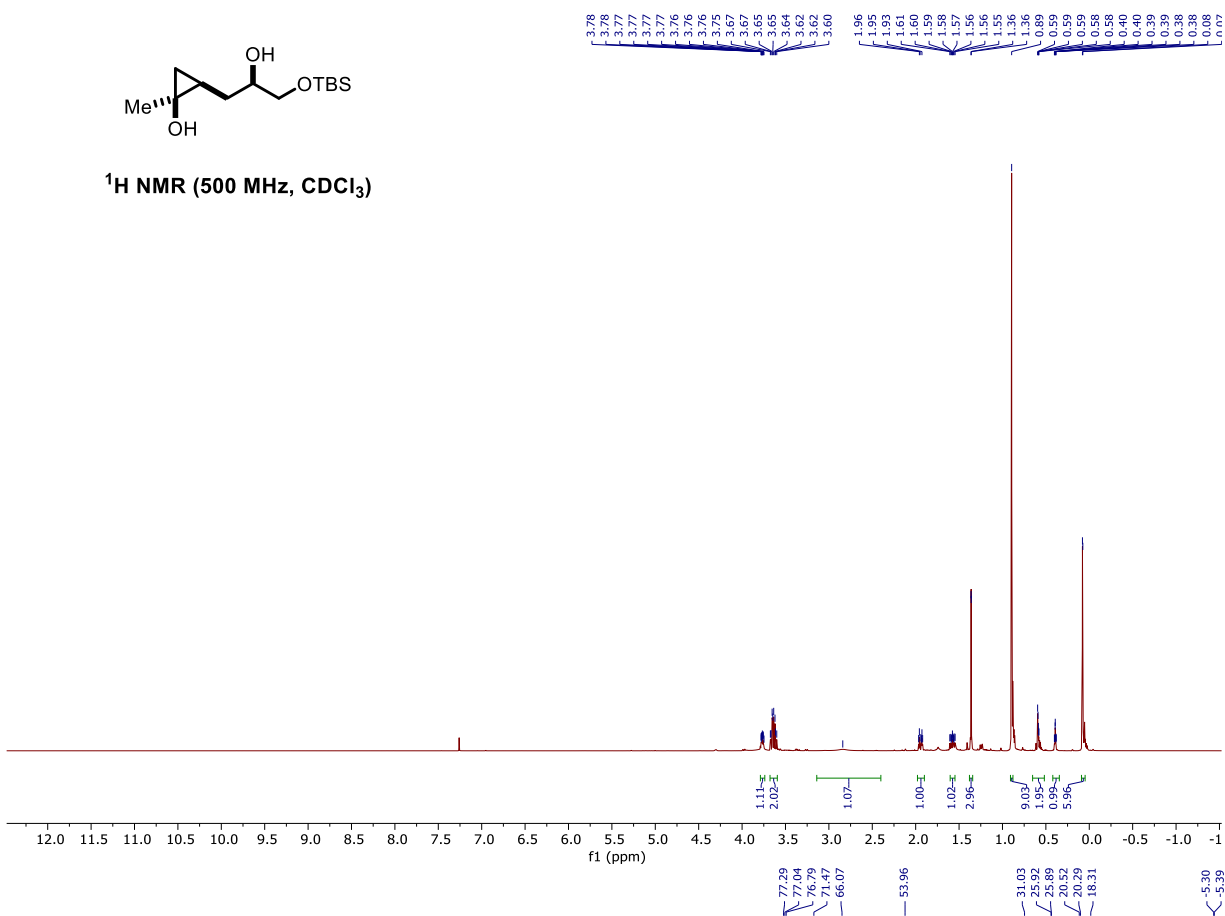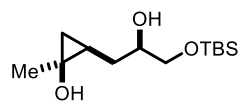

<sup>13</sup>C NMR (125 MHz, CDCl<sub>3</sub>)

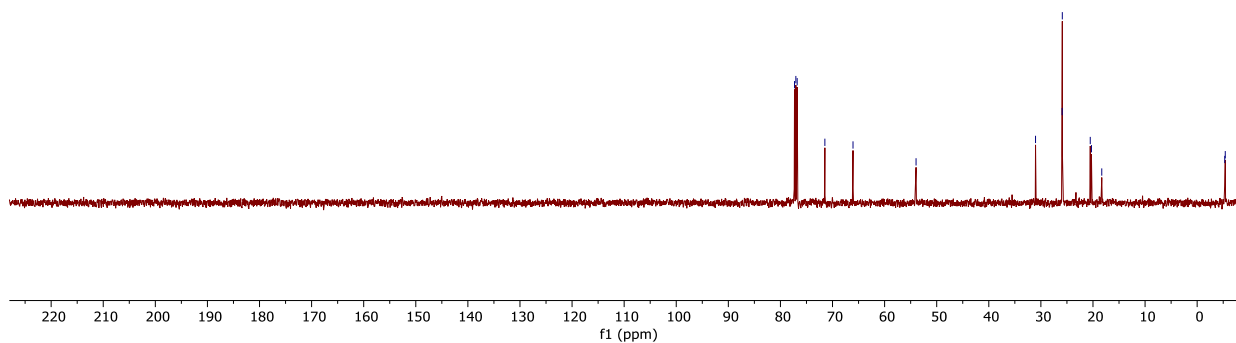

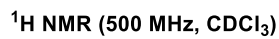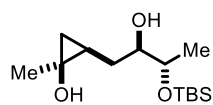<sup>13</sup>C NMR (125 MHz, CDCl<sub>3</sub>)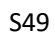

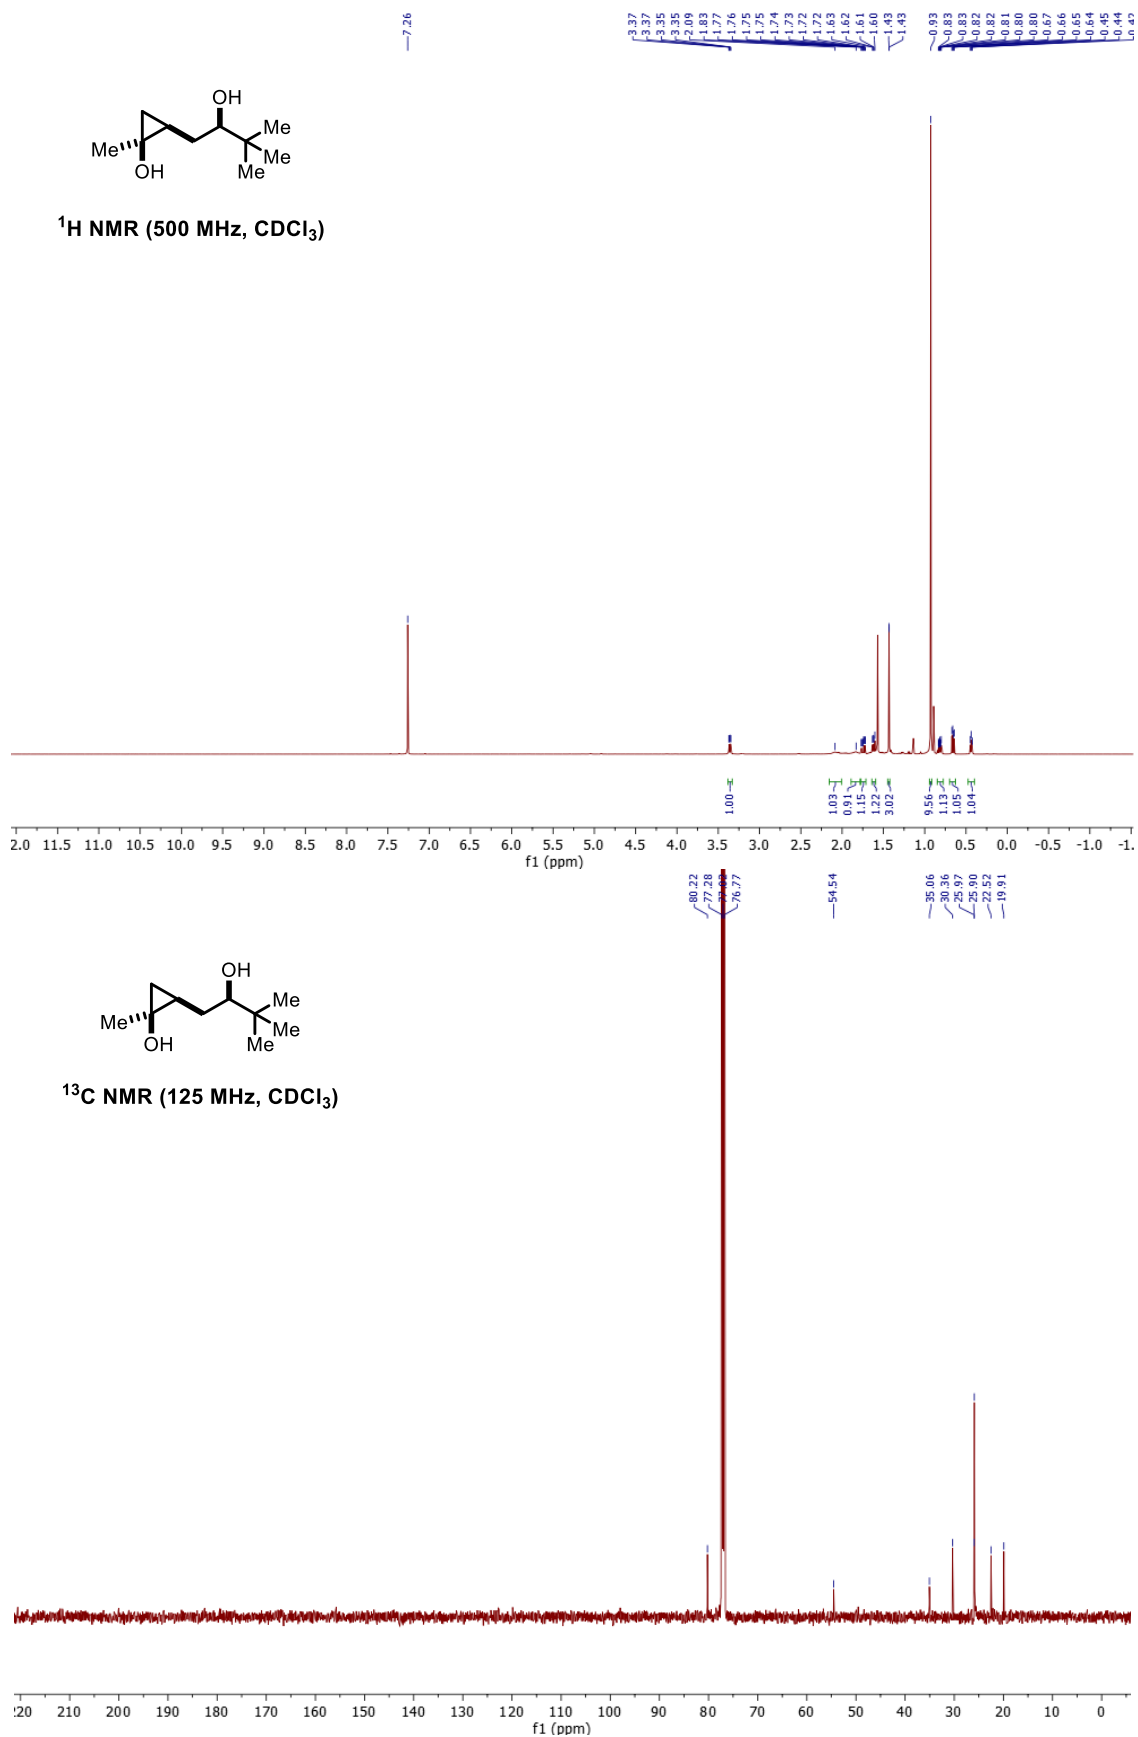

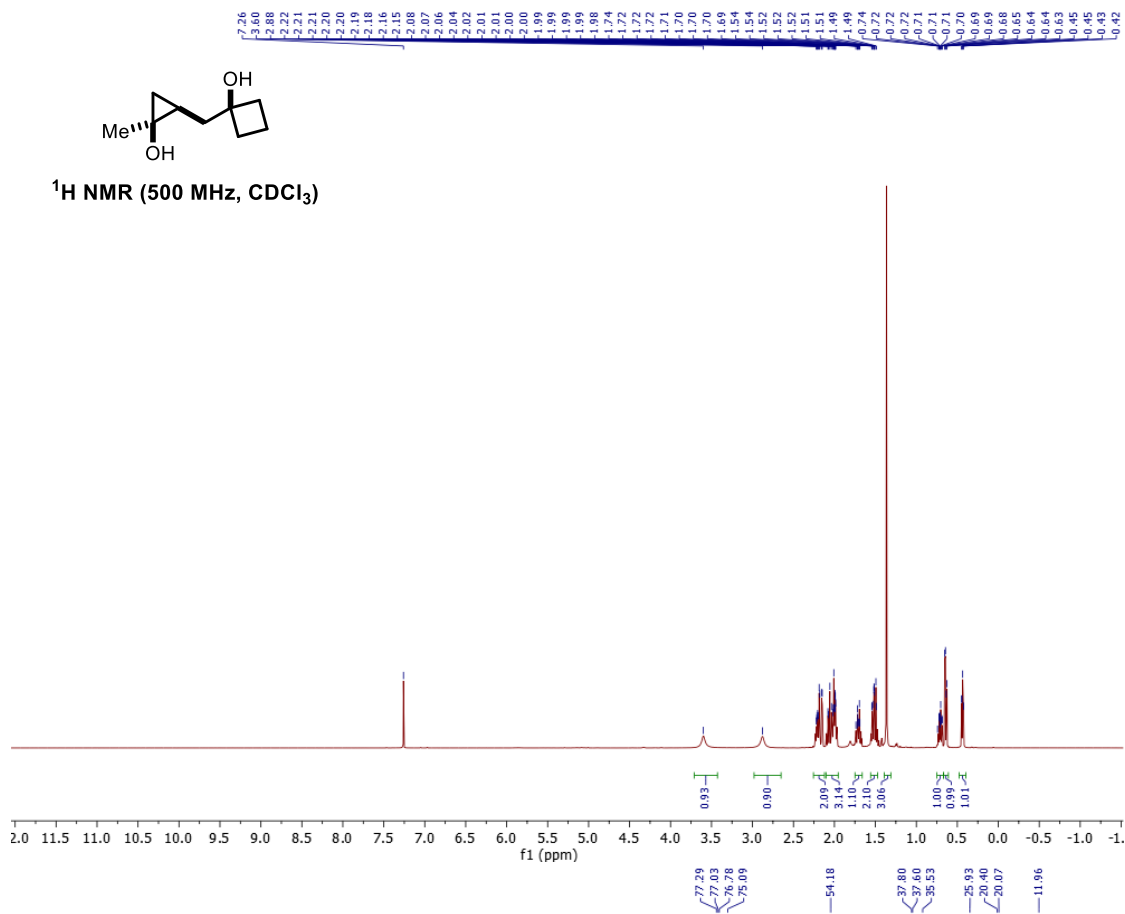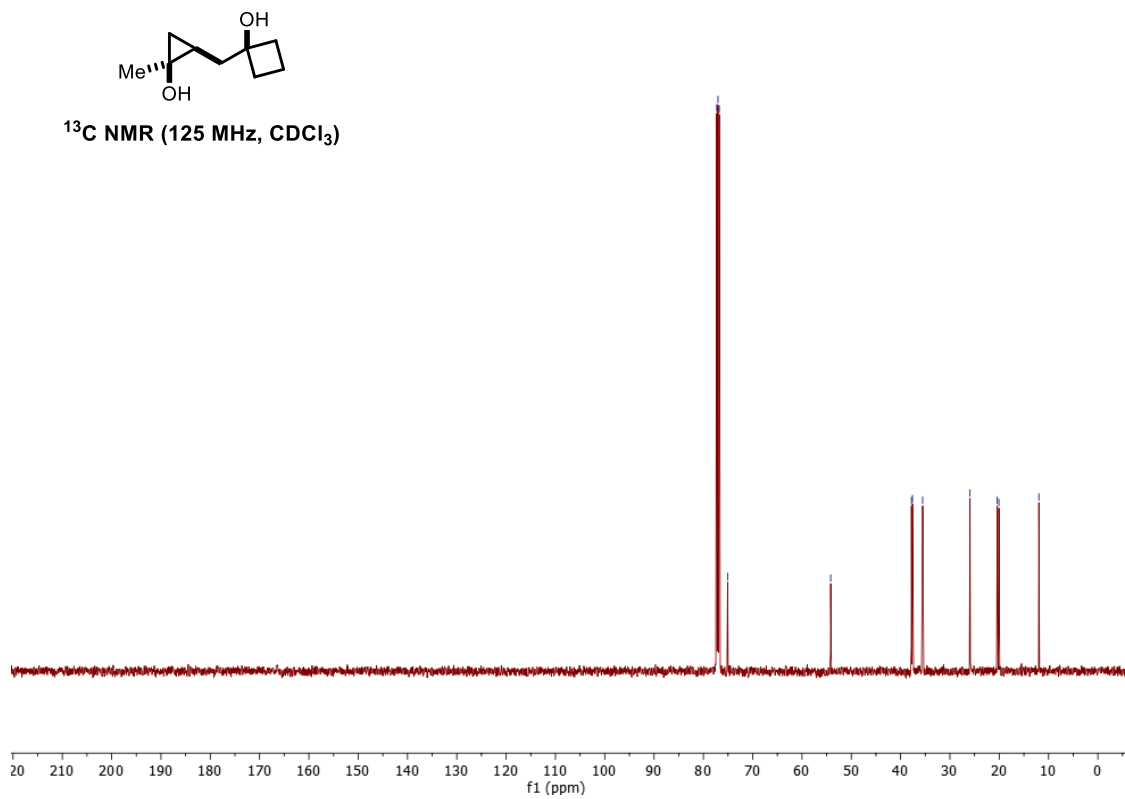

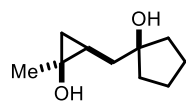

$^1\text{H}$  NMR (500 MHz,  $\text{CDCl}_3$ )

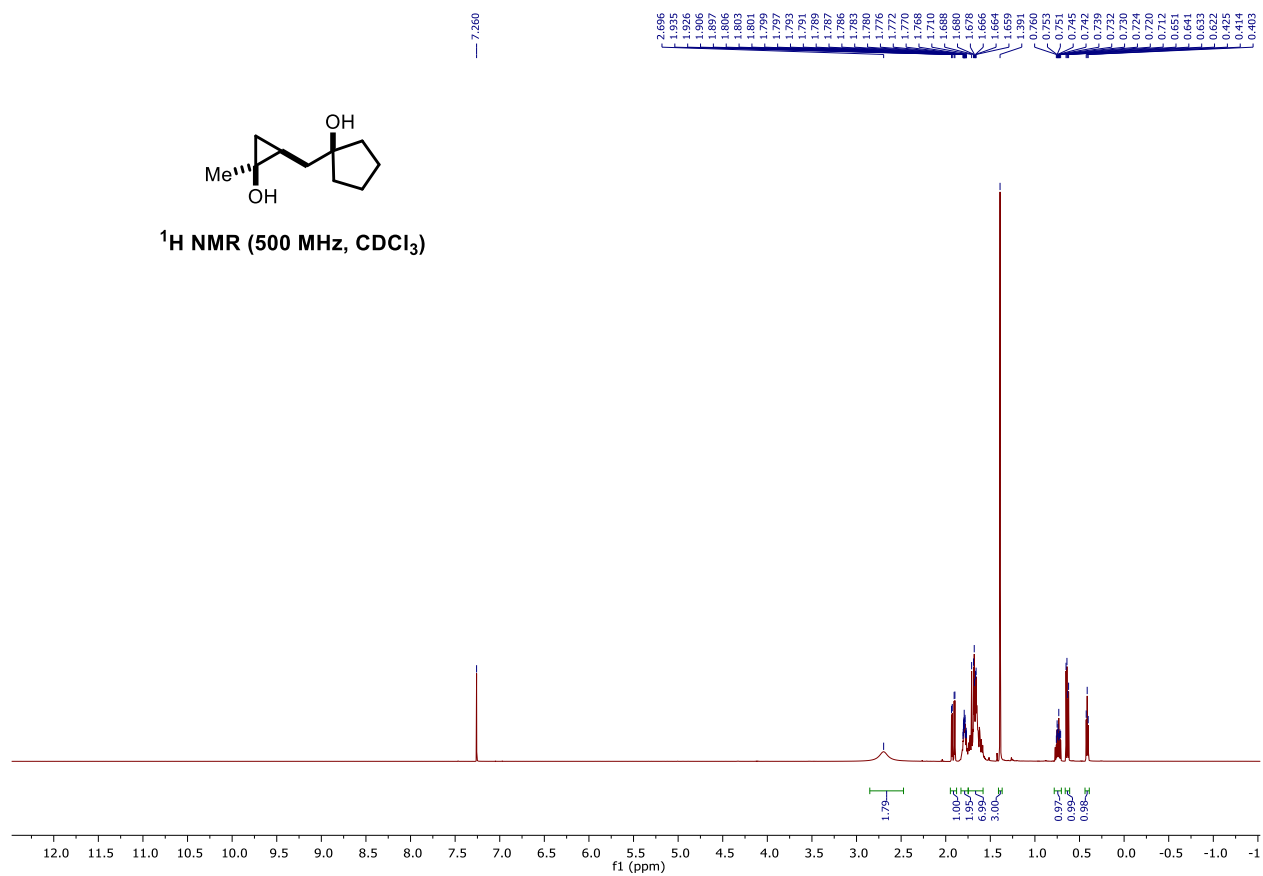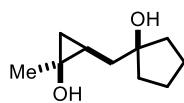

$^{13}\text{C}$  NMR (125 MHz,  $\text{CDCl}_3$ )

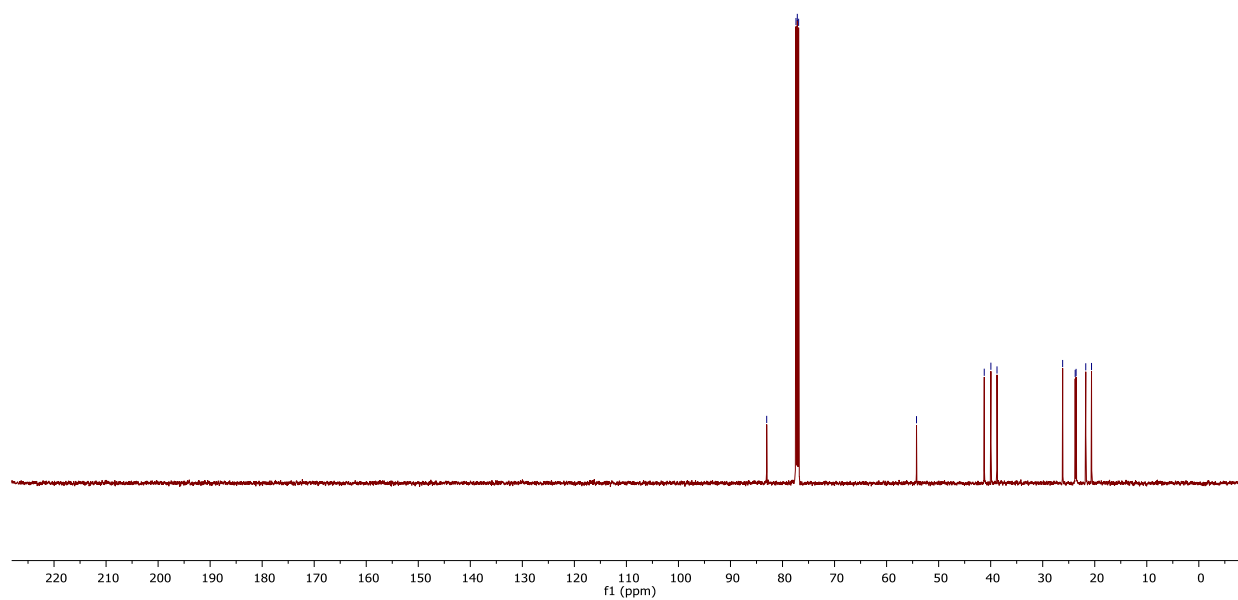

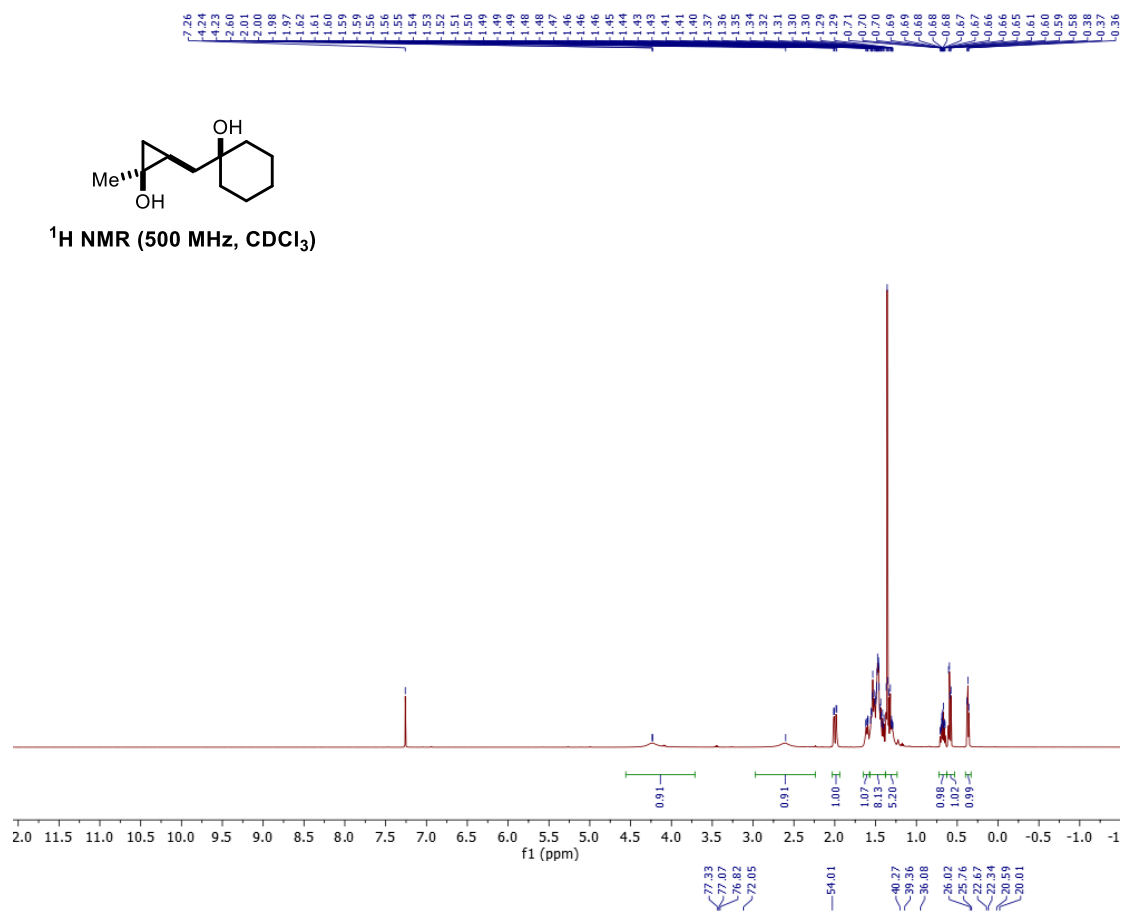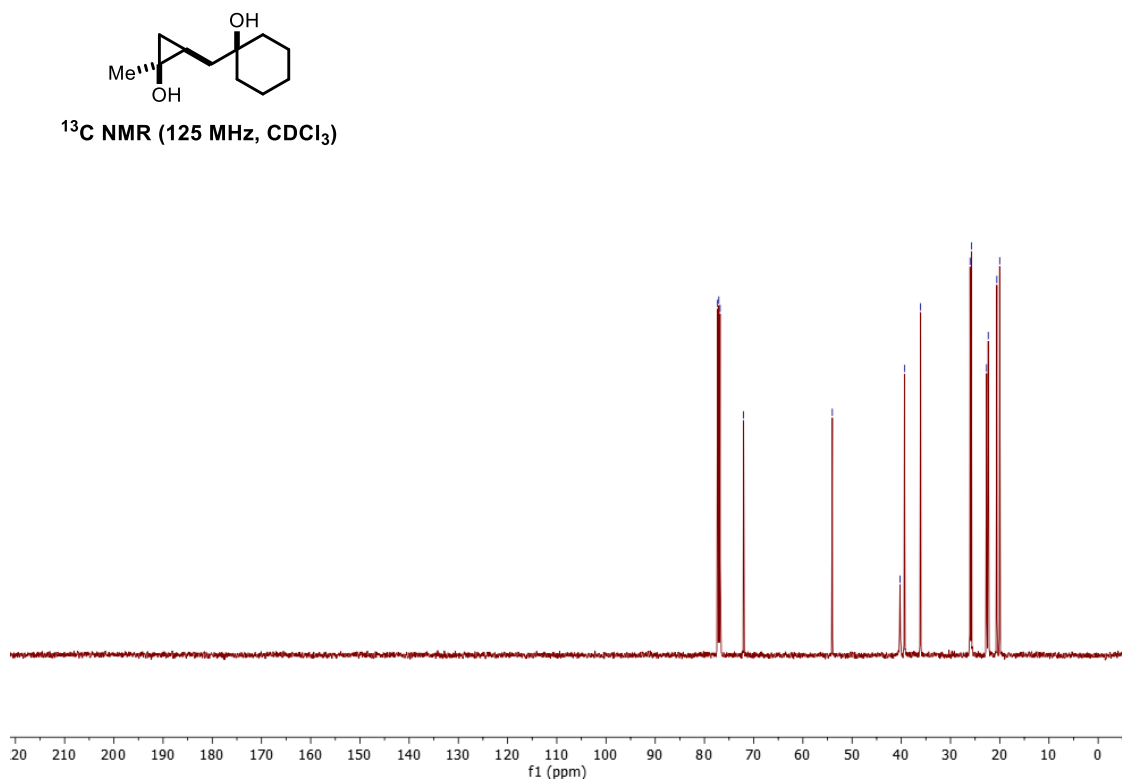

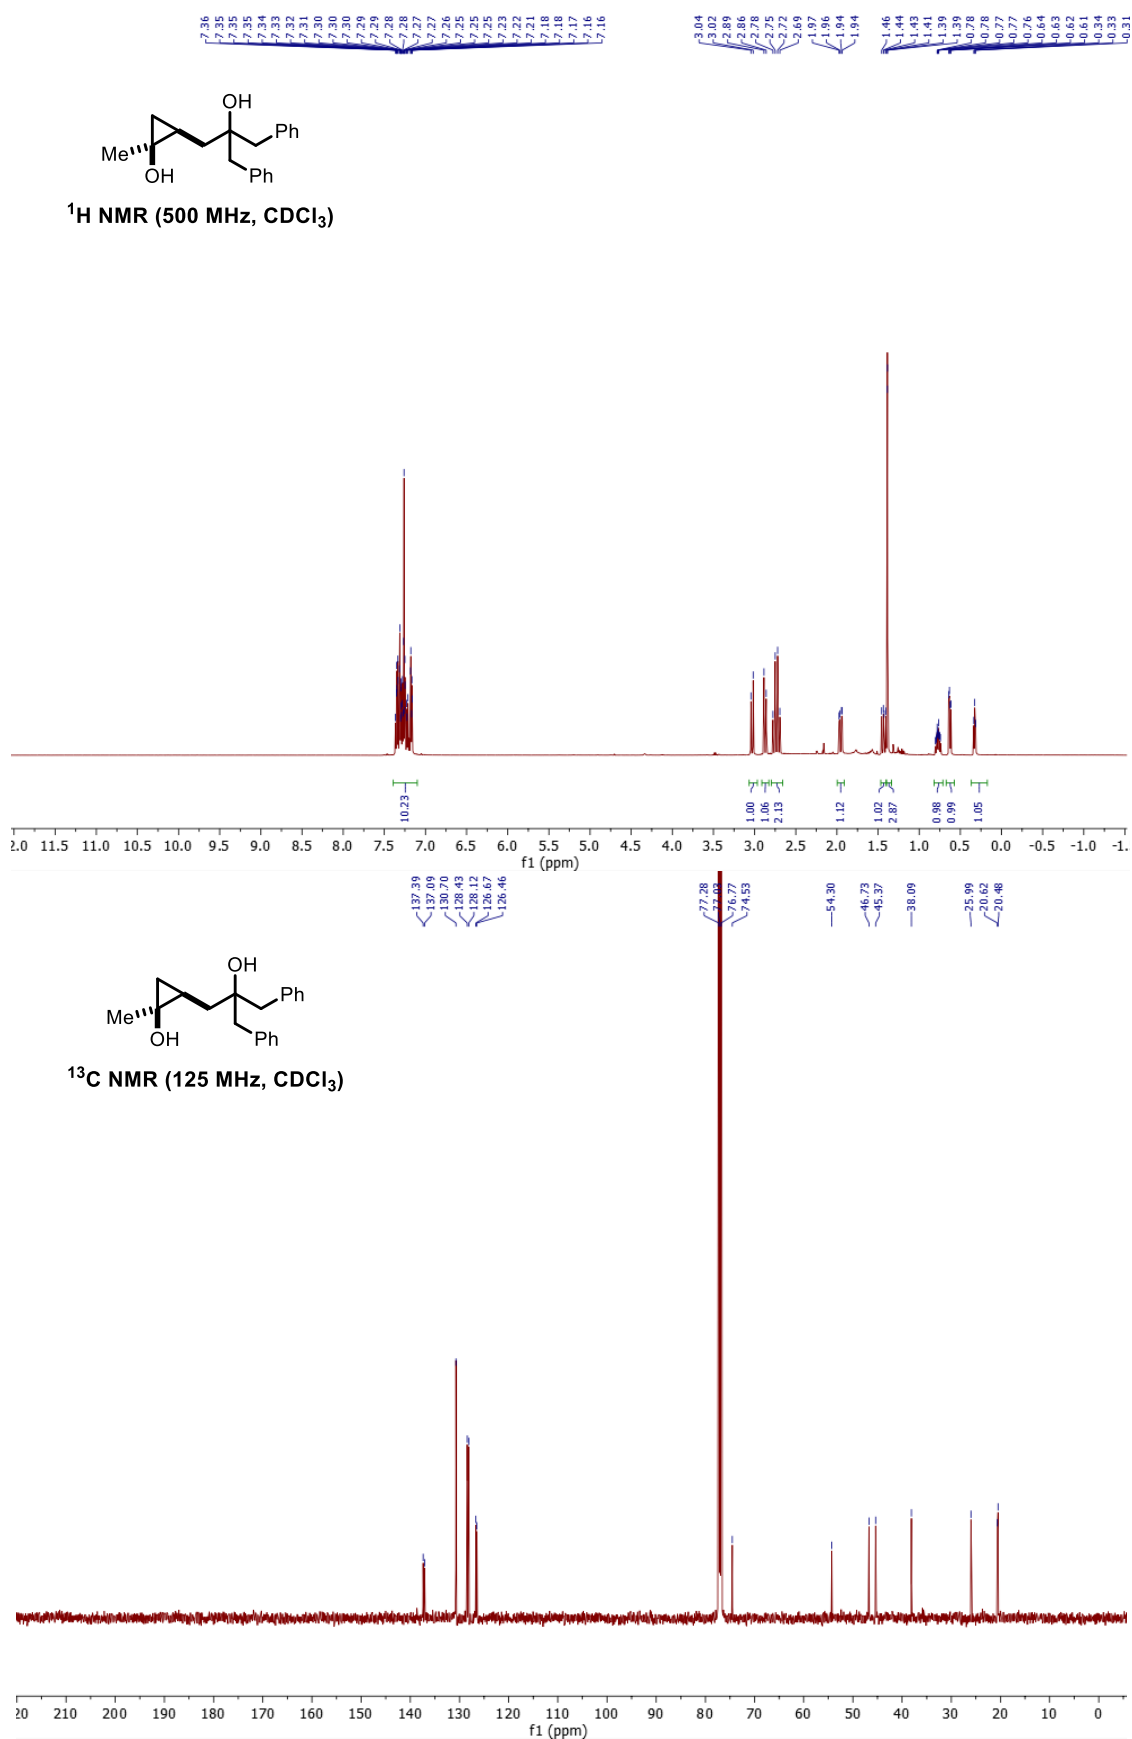

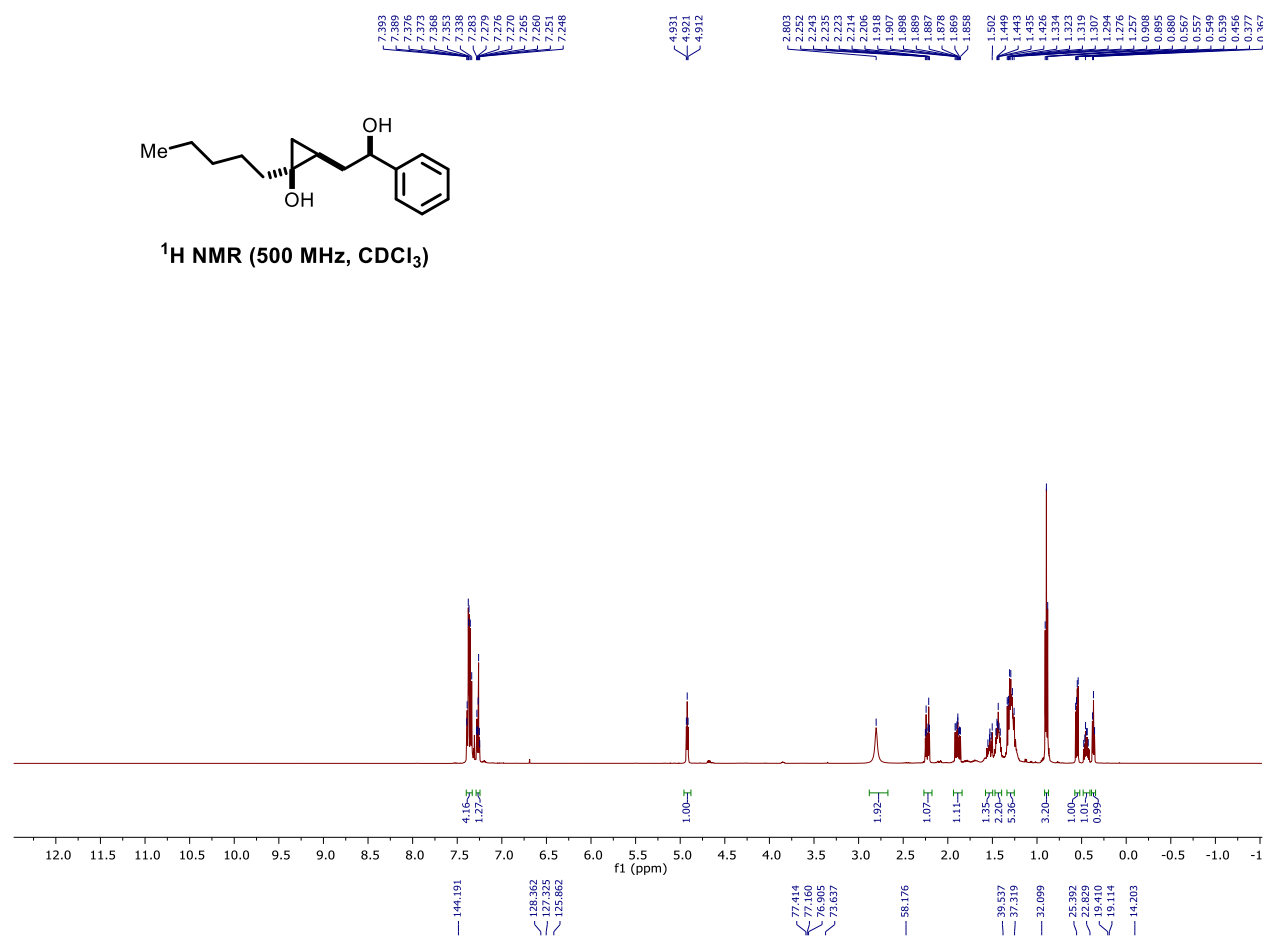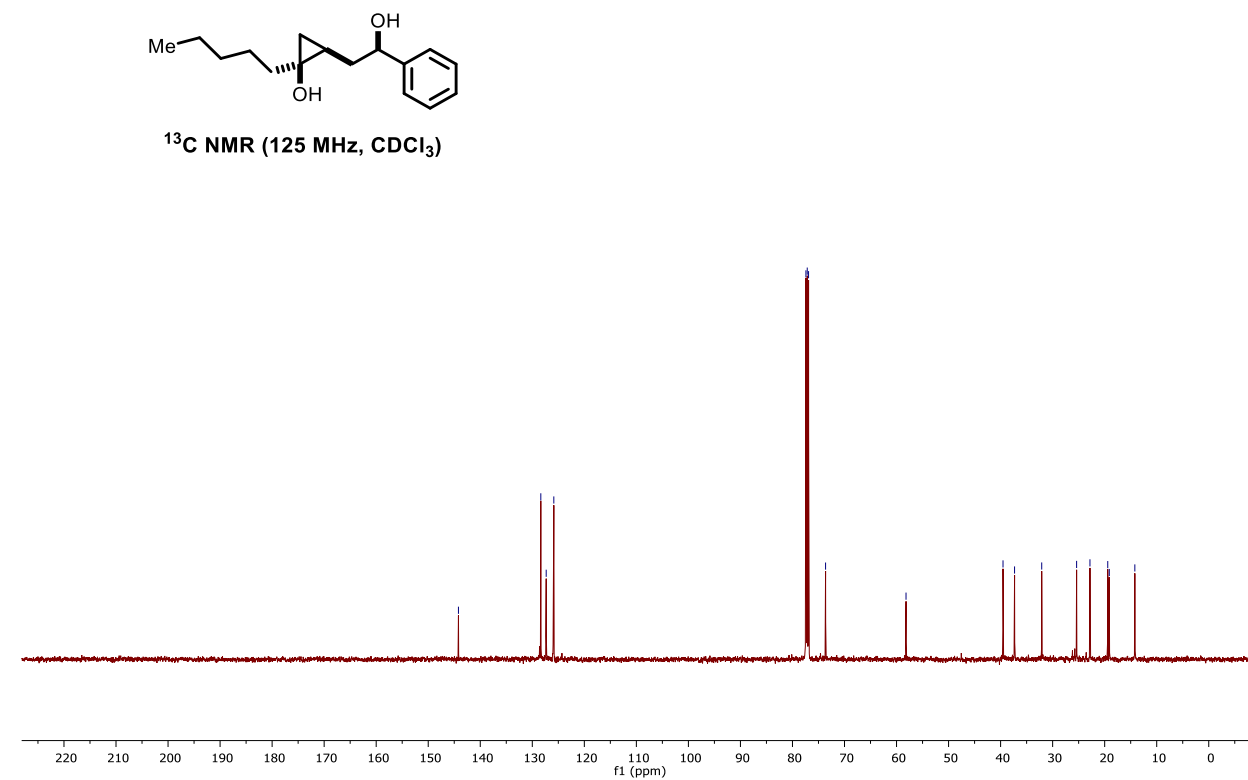

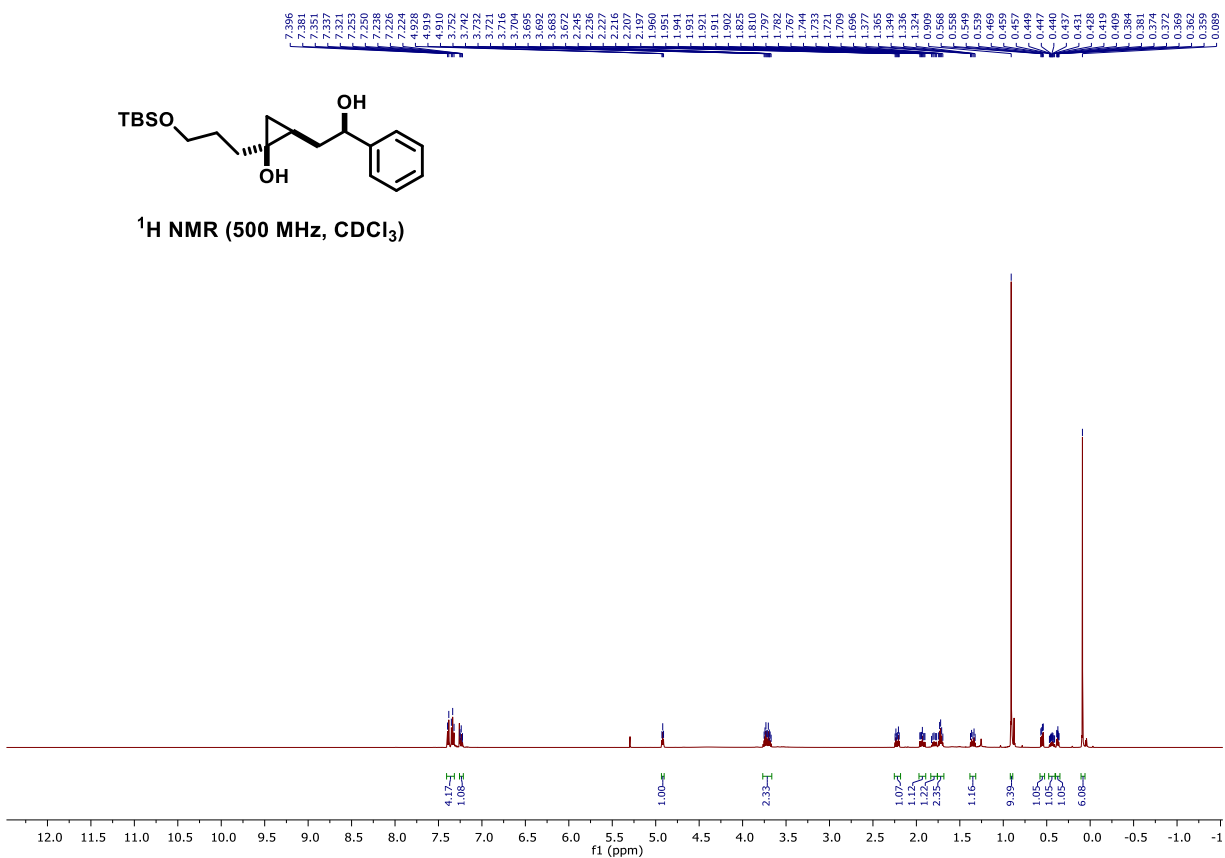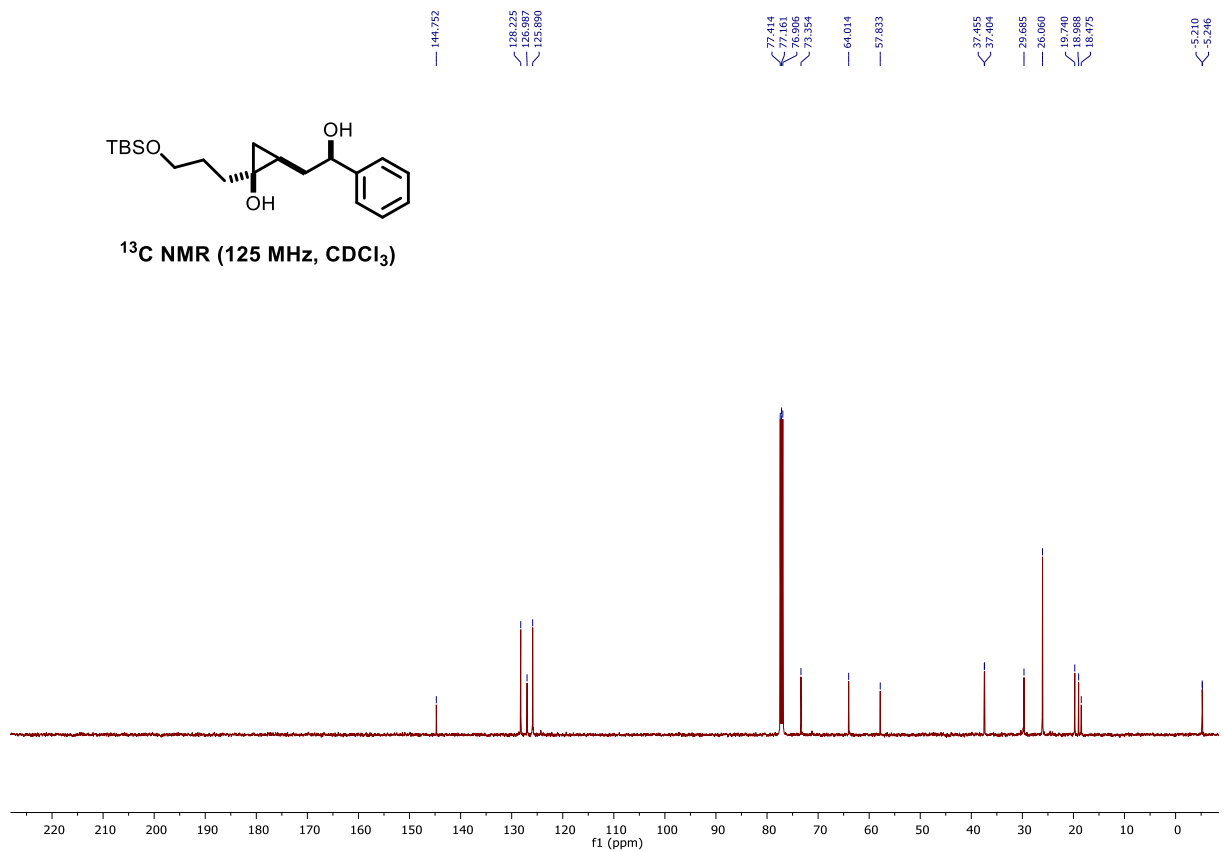

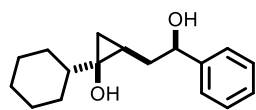

<sup>1</sup>H NMR (500 MHz, CDCl<sub>3</sub>)

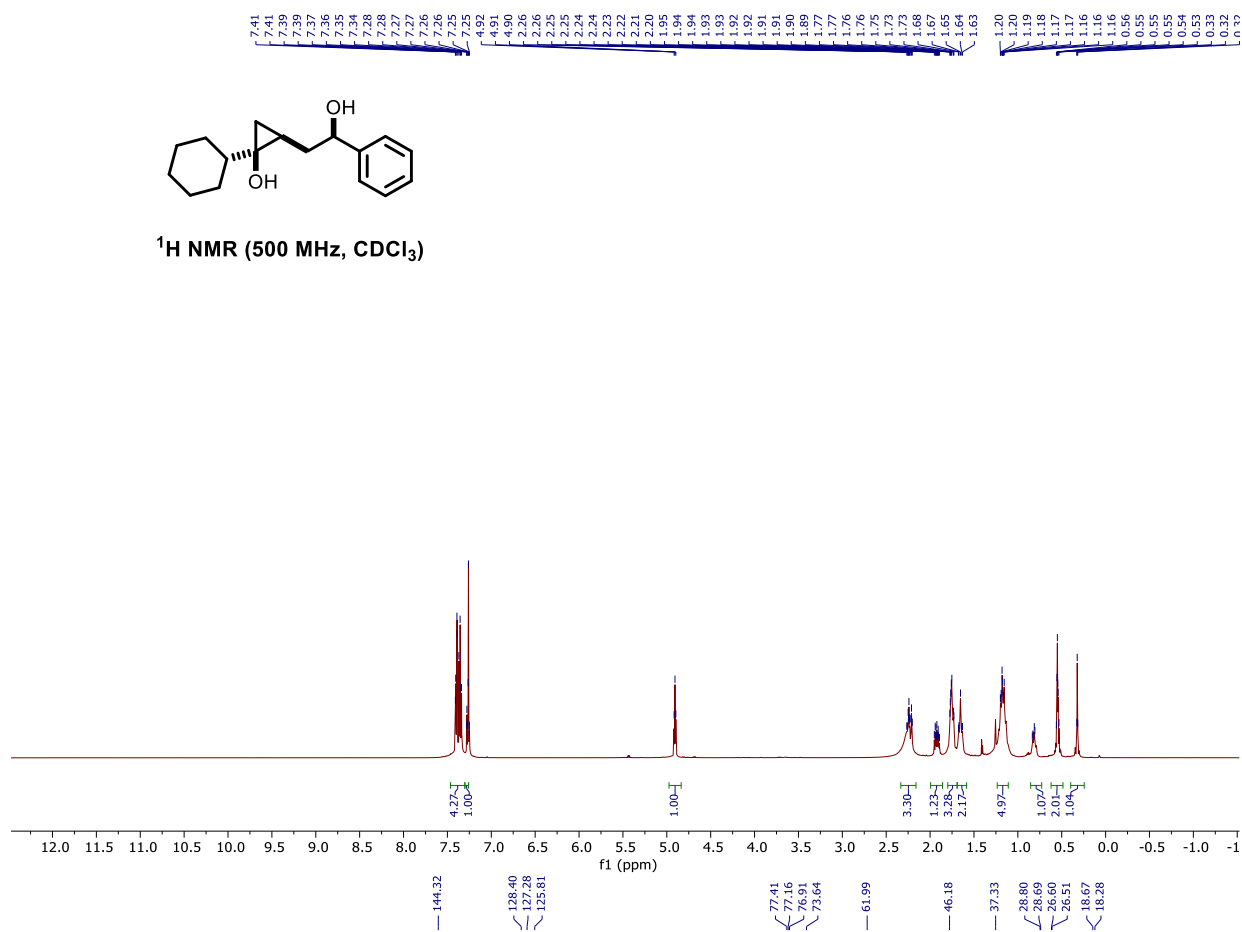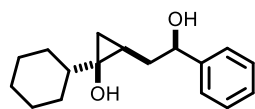

<sup>13</sup>C NMR (125 MHz, CDCl<sub>3</sub>)

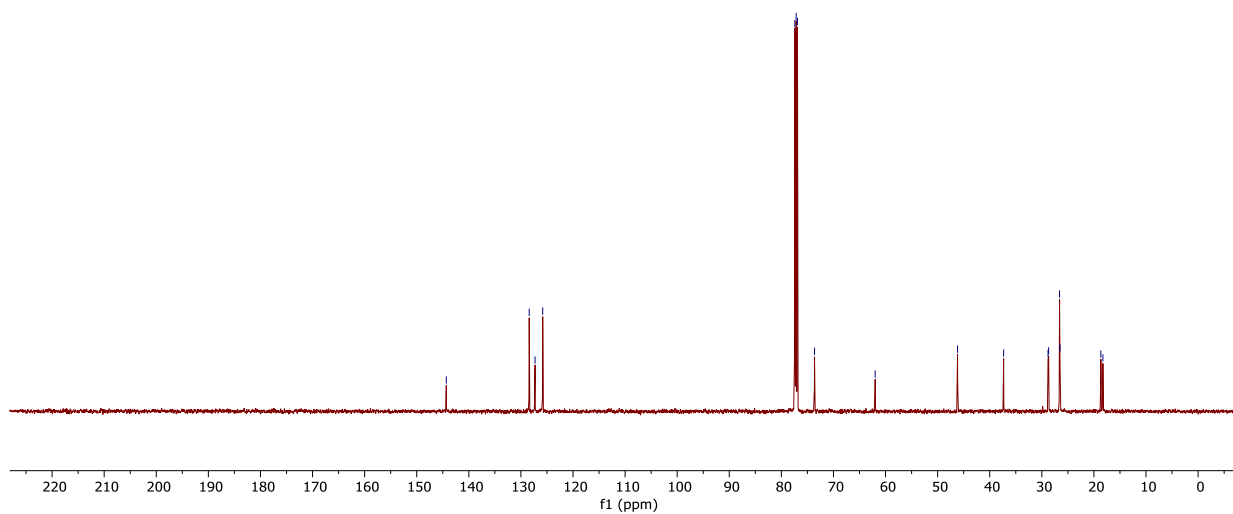

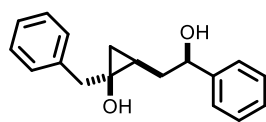

<sup>1</sup>H NMR (500 MHz, CDCl<sub>3</sub>)

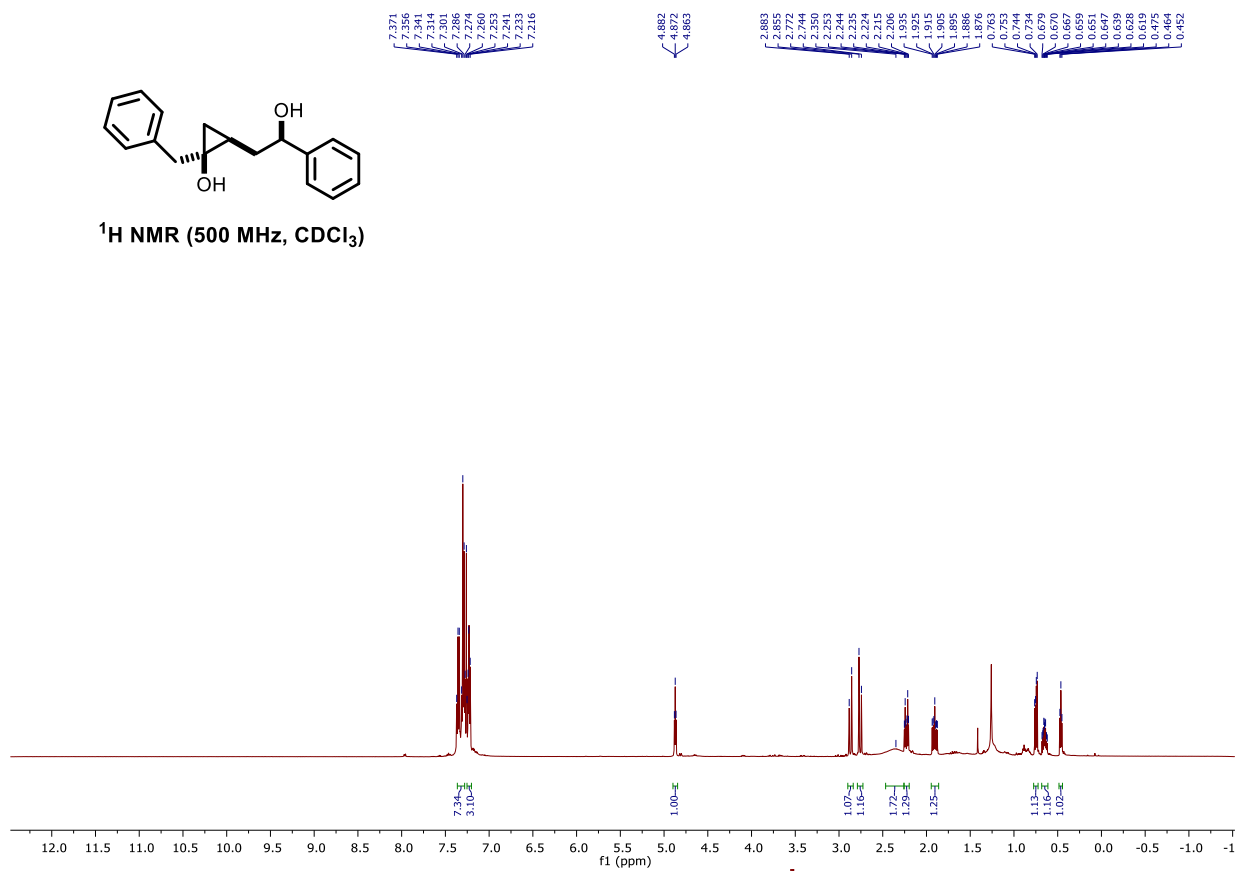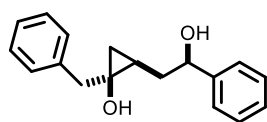

<sup>13</sup>C NMR (125 MHz, CDCl<sub>3</sub>)

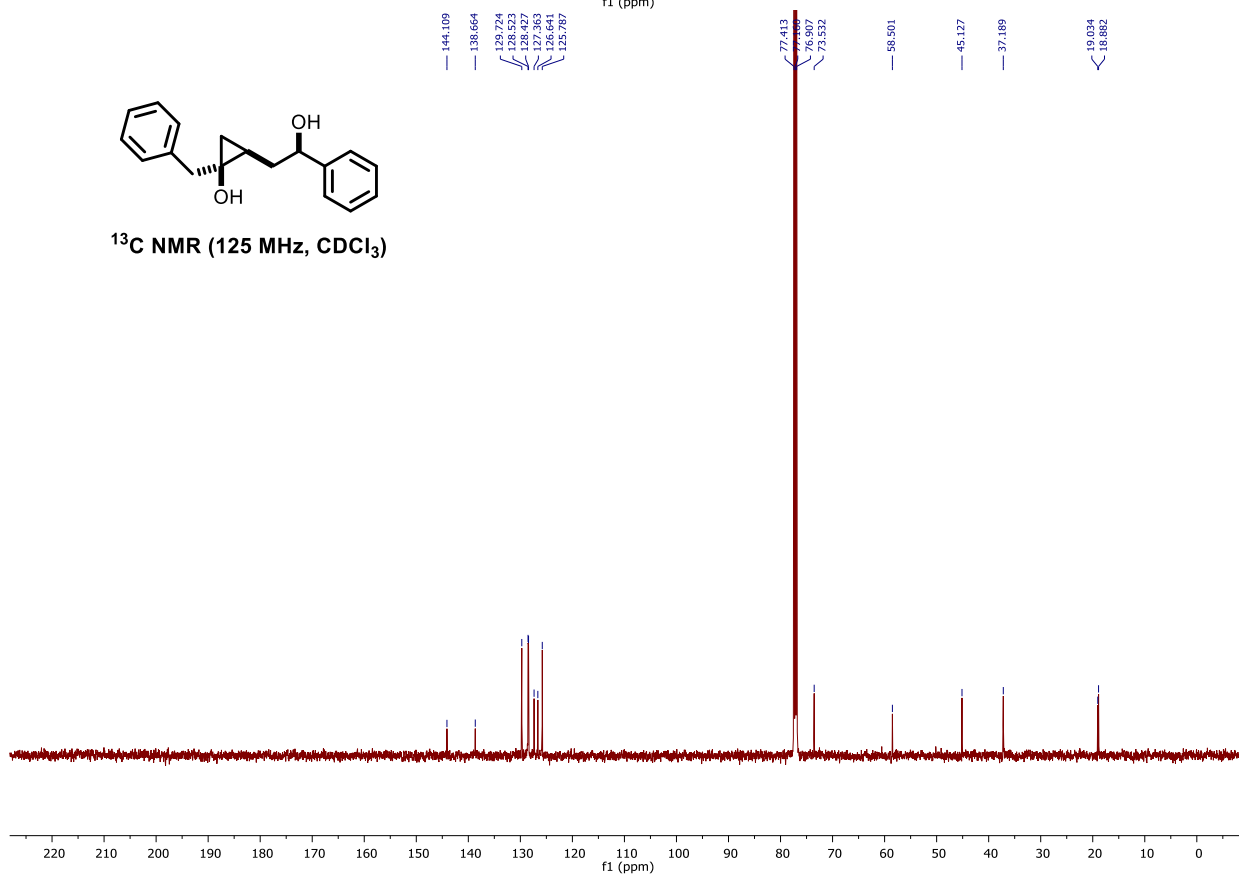

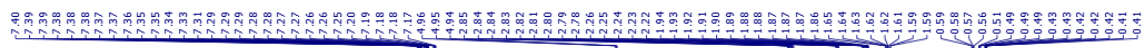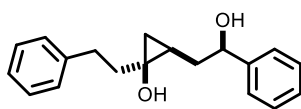

$^1\text{H}$  NMR (500 MHz,  $\text{CDCl}_3$ )

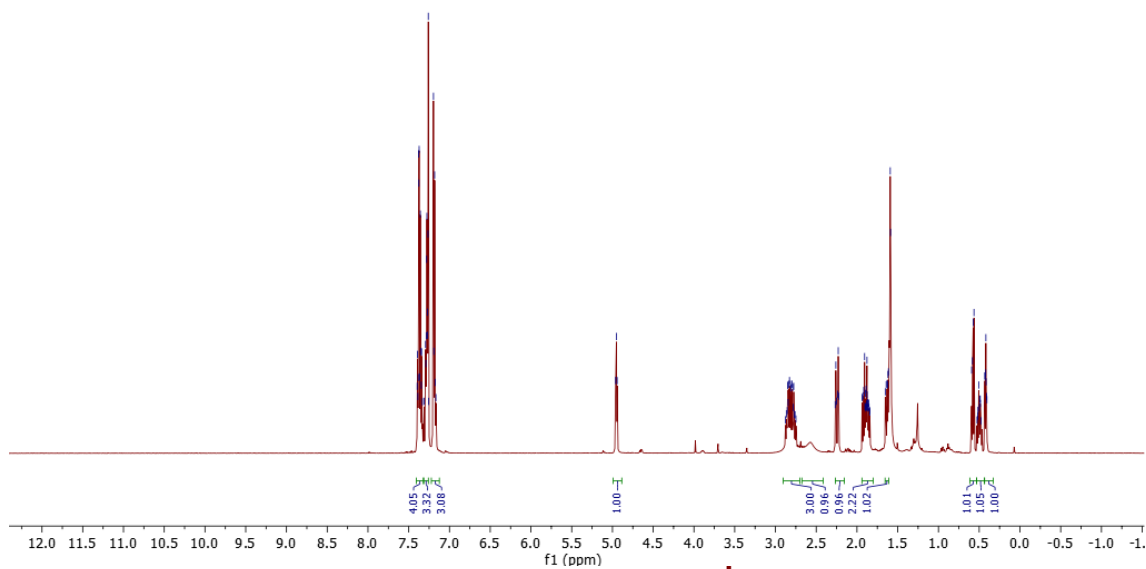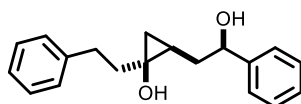

$^{13}\text{C}$  NMR (125 MHz,  $\text{CDCl}_3$ )

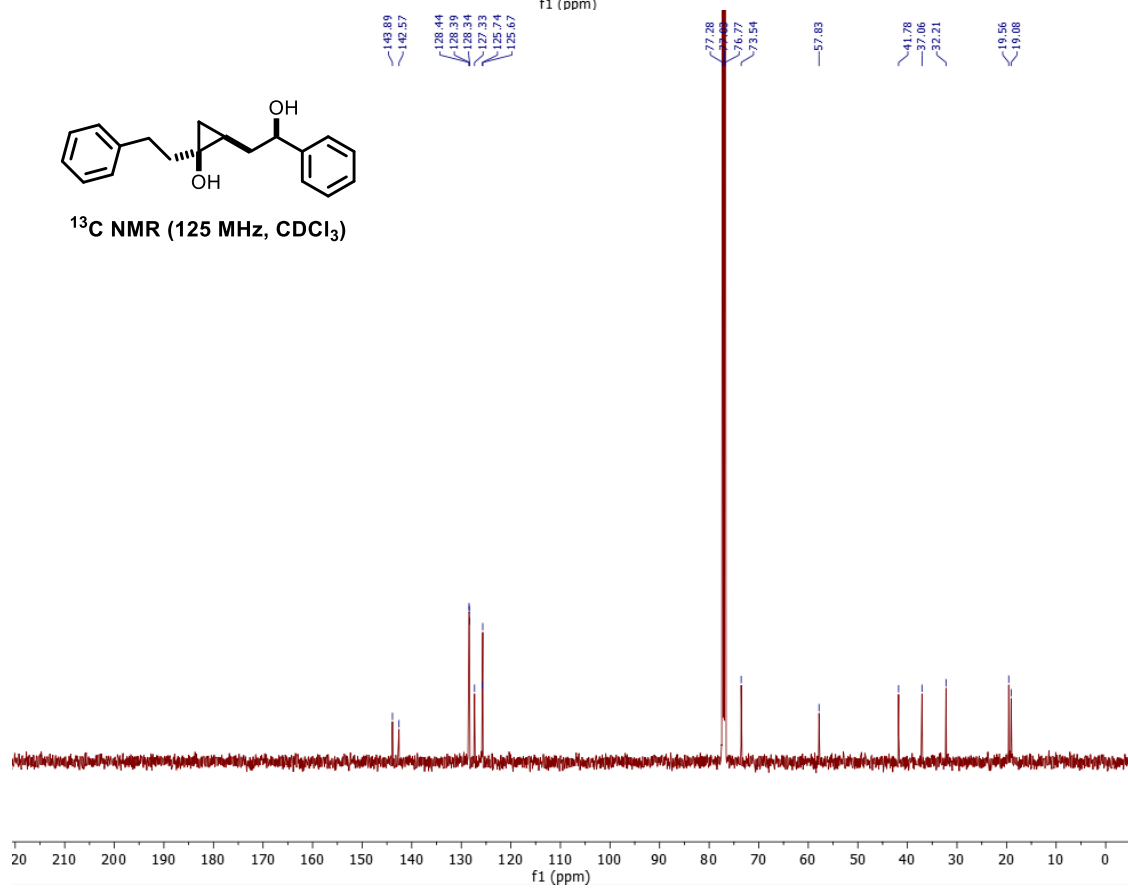

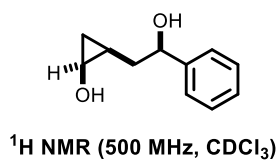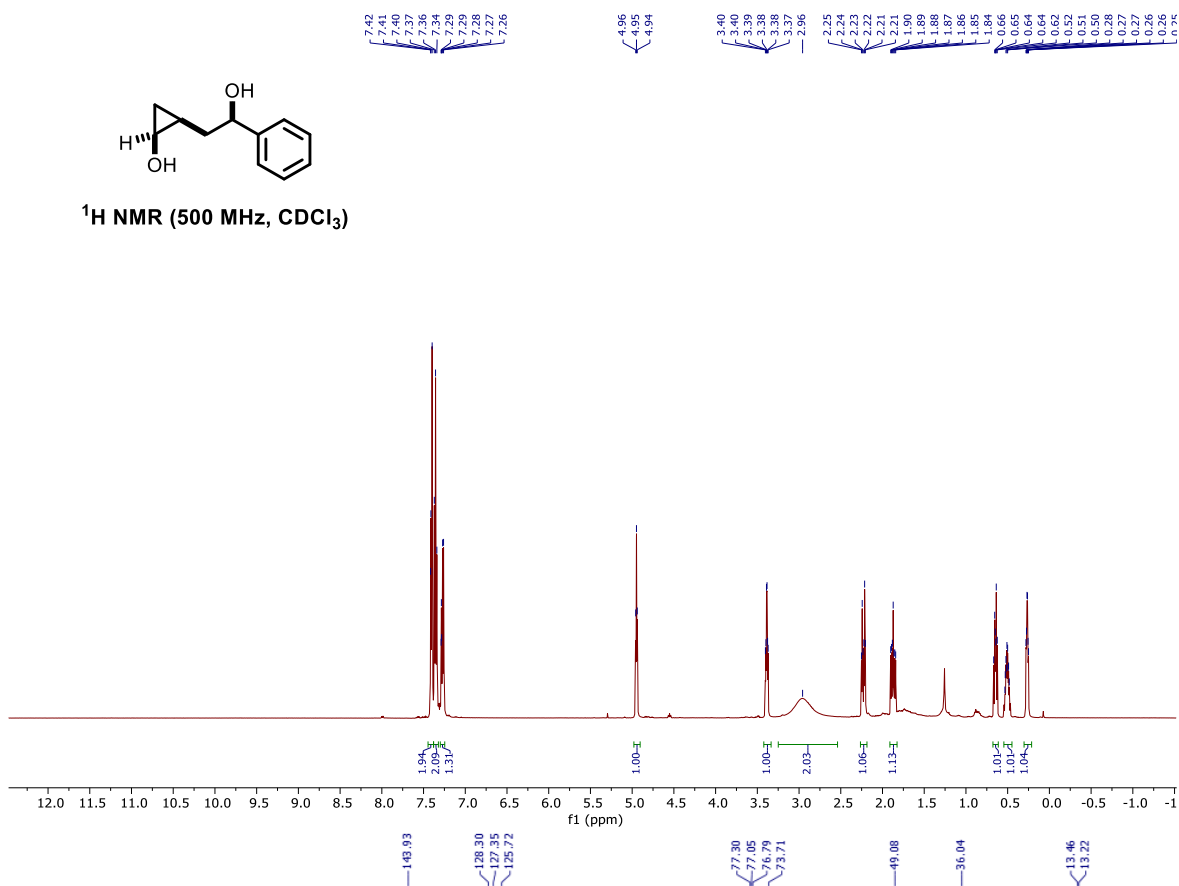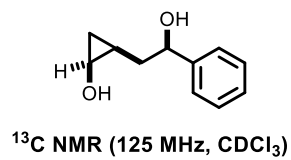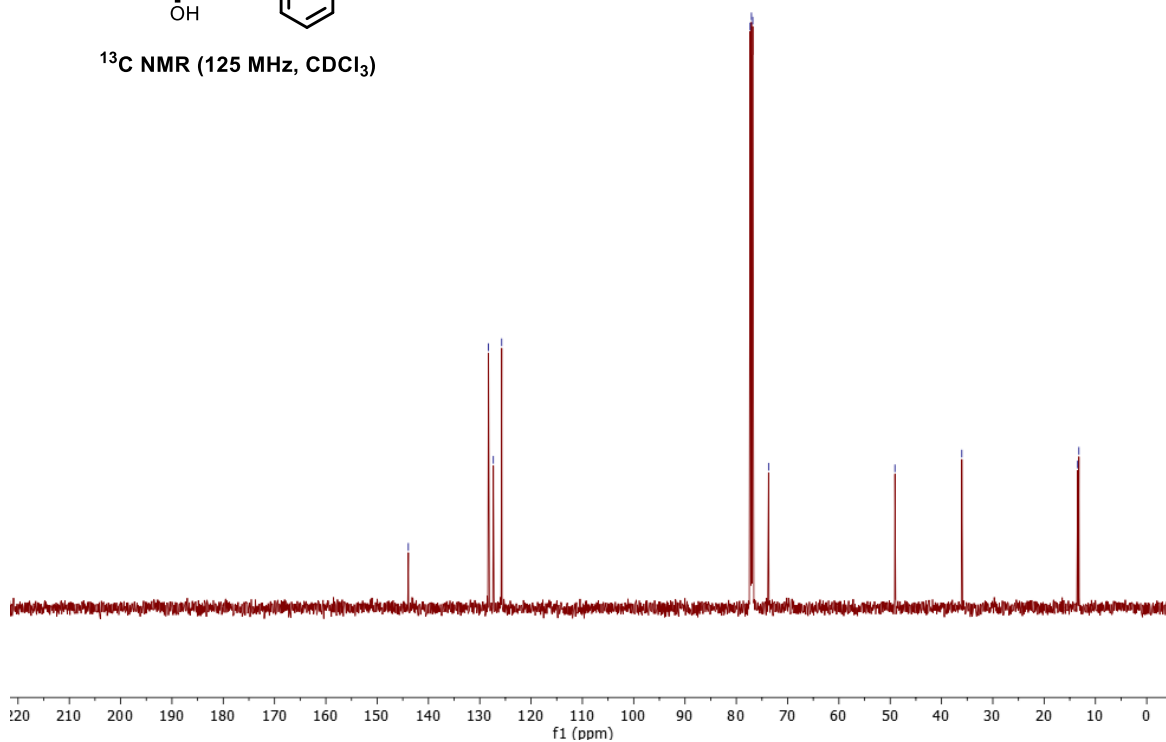

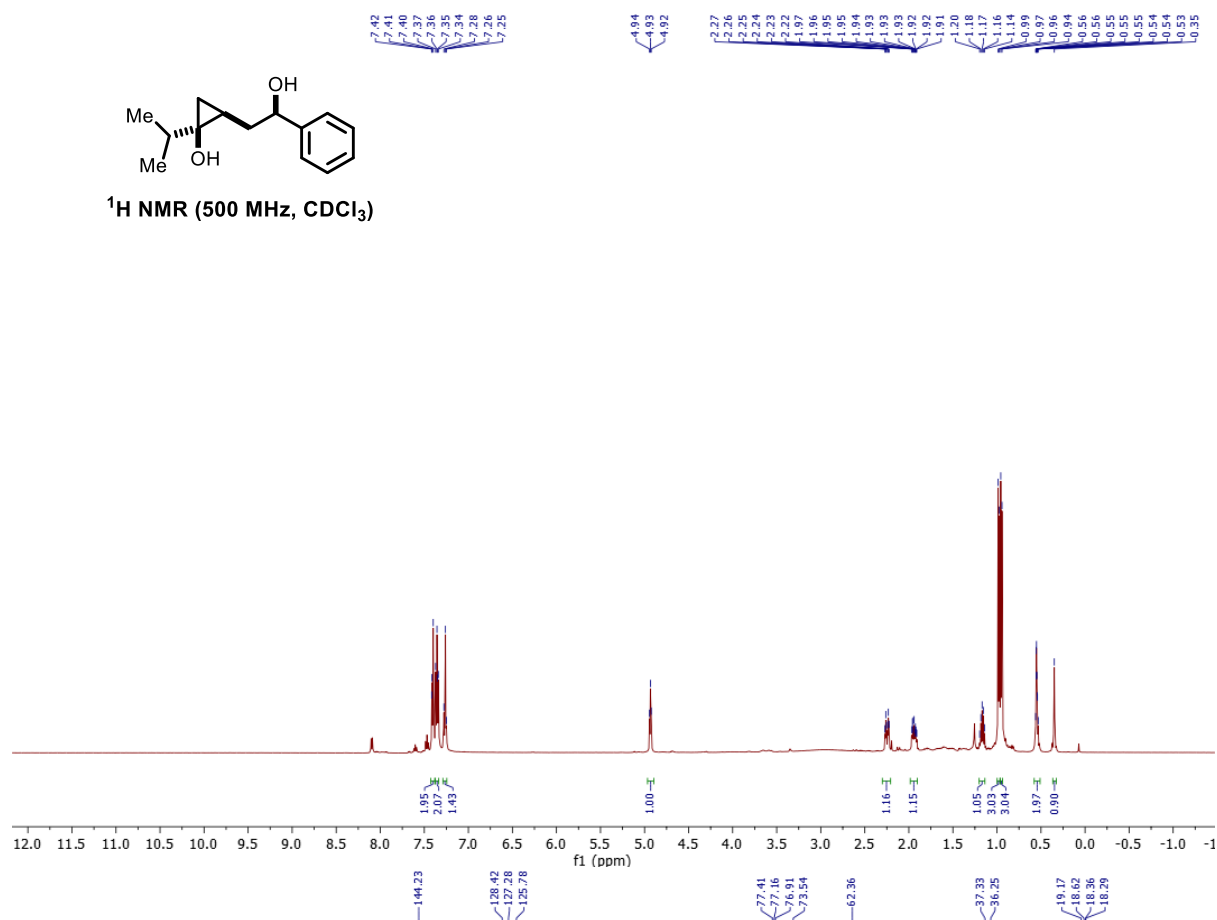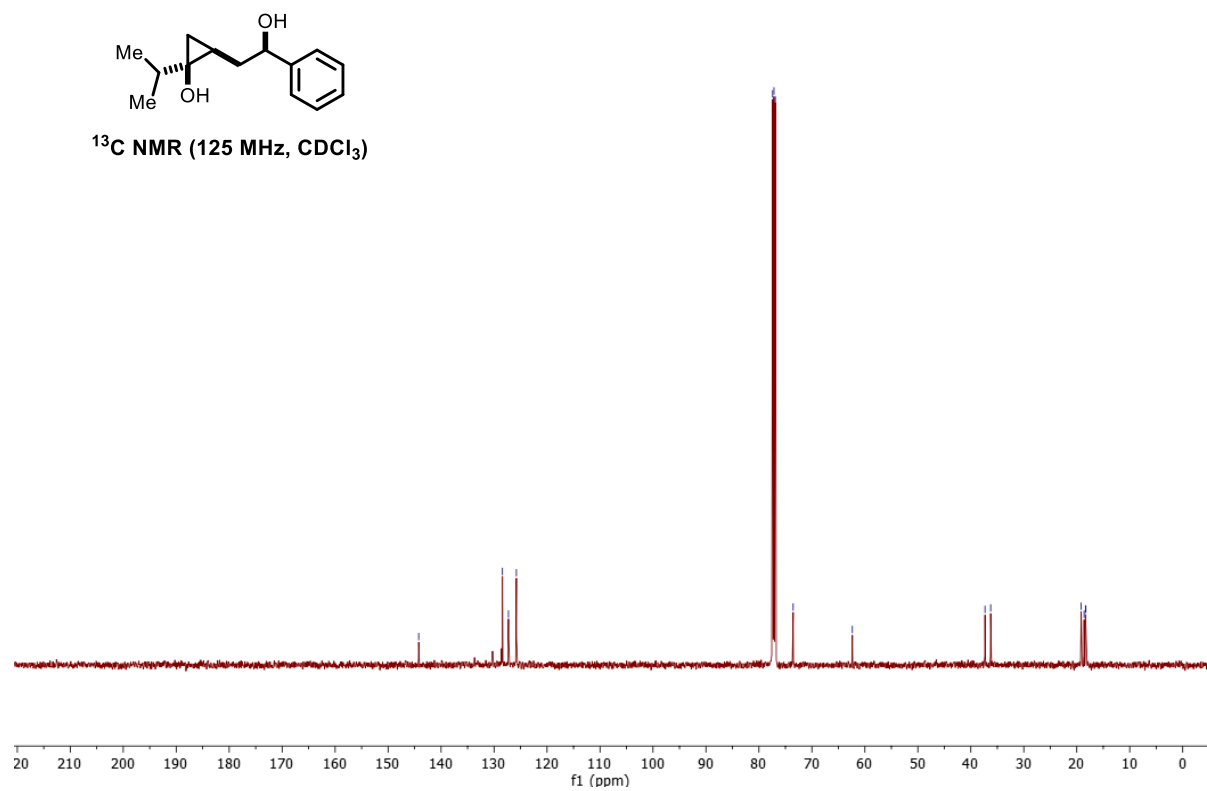

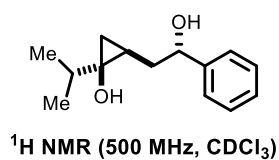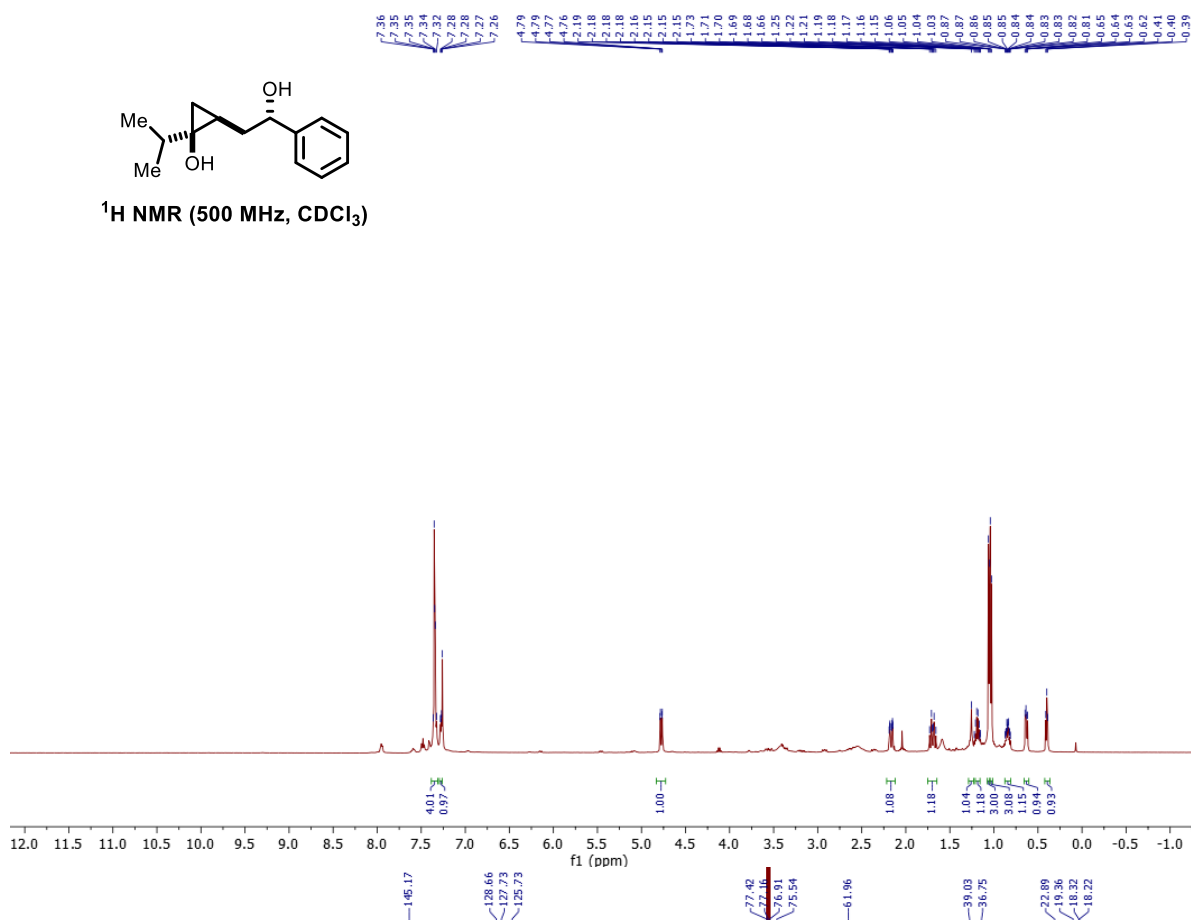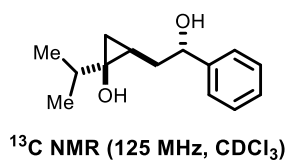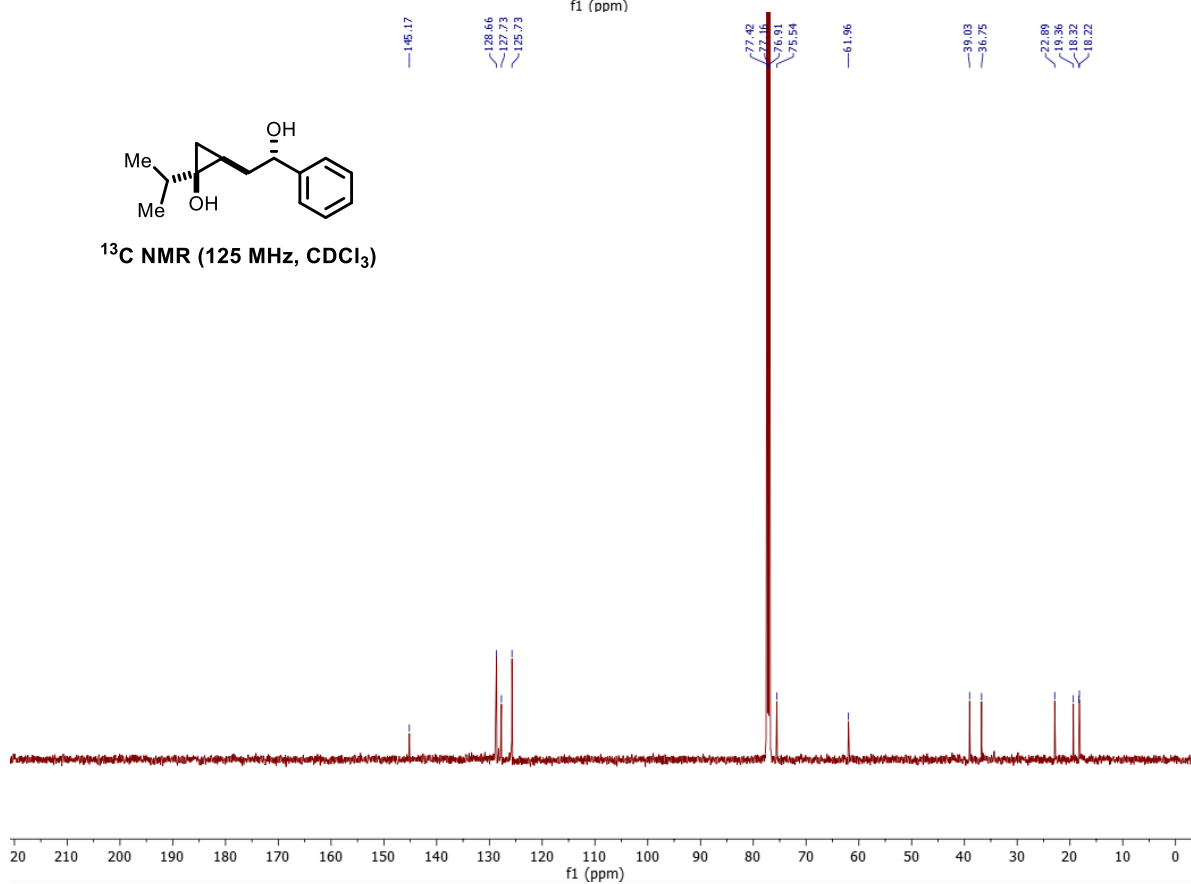

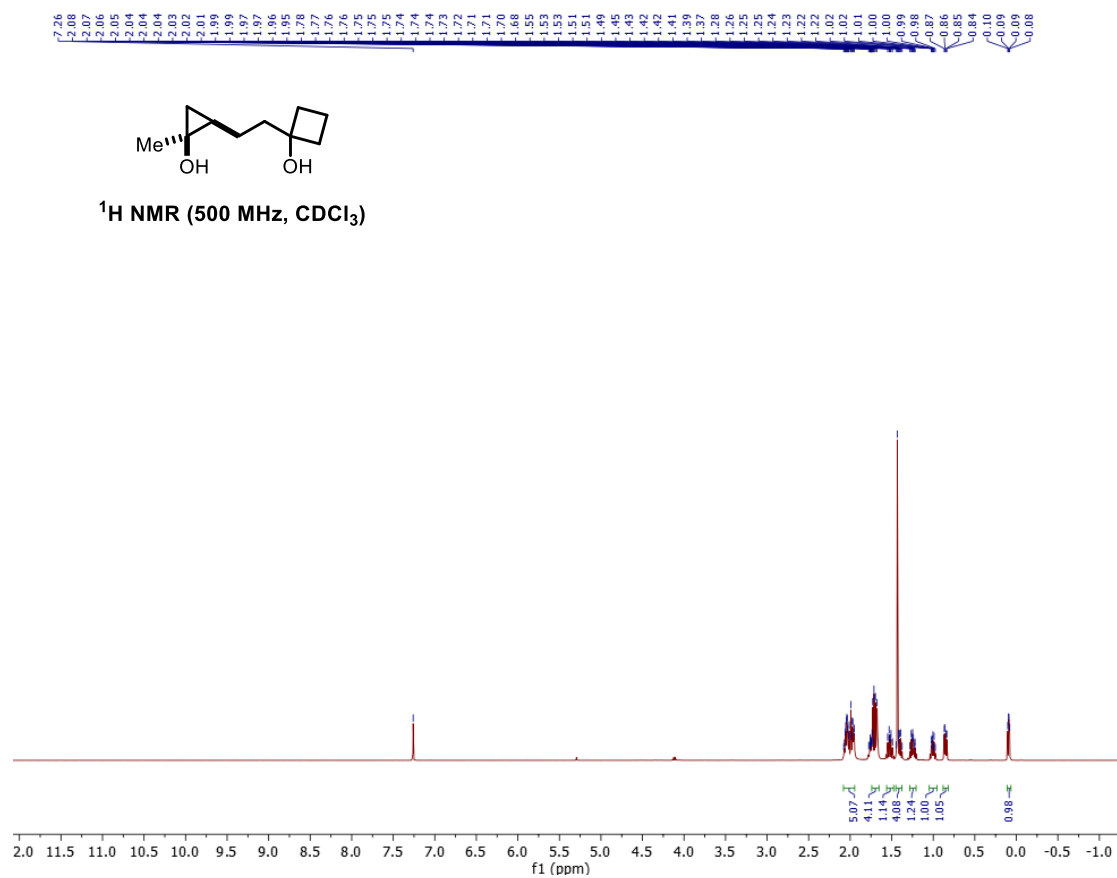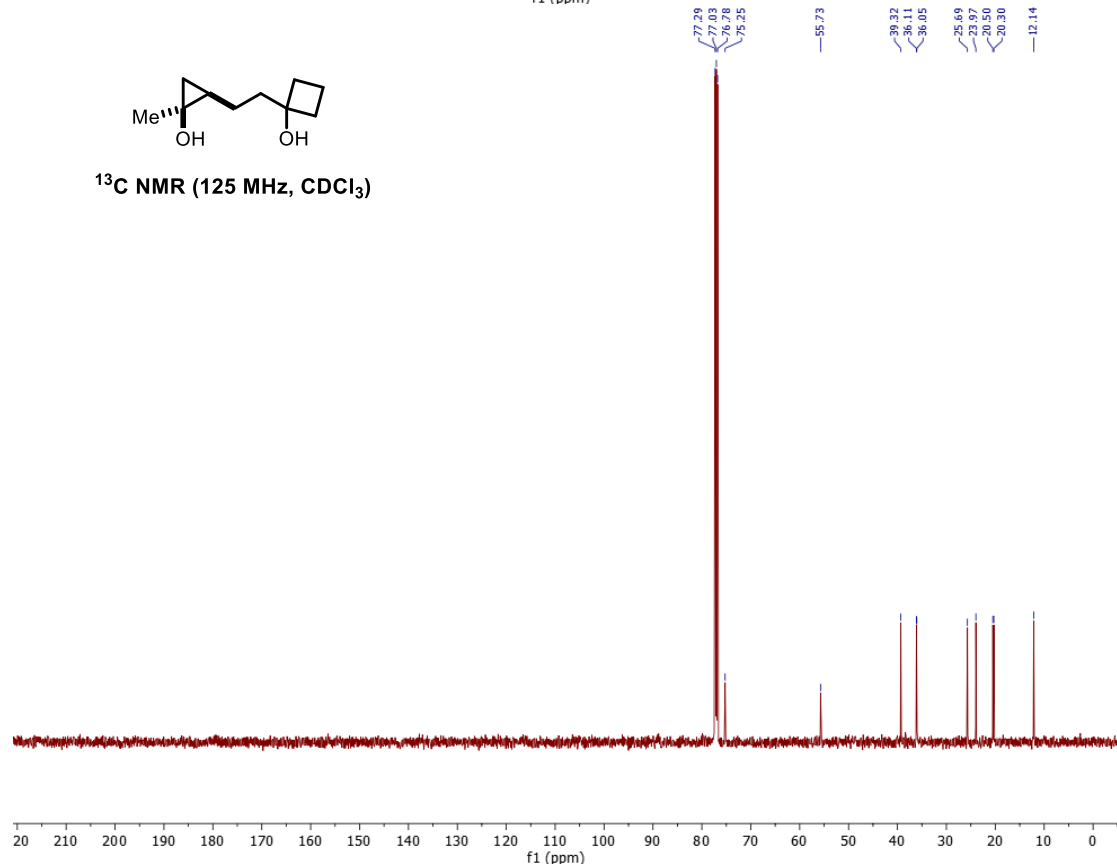

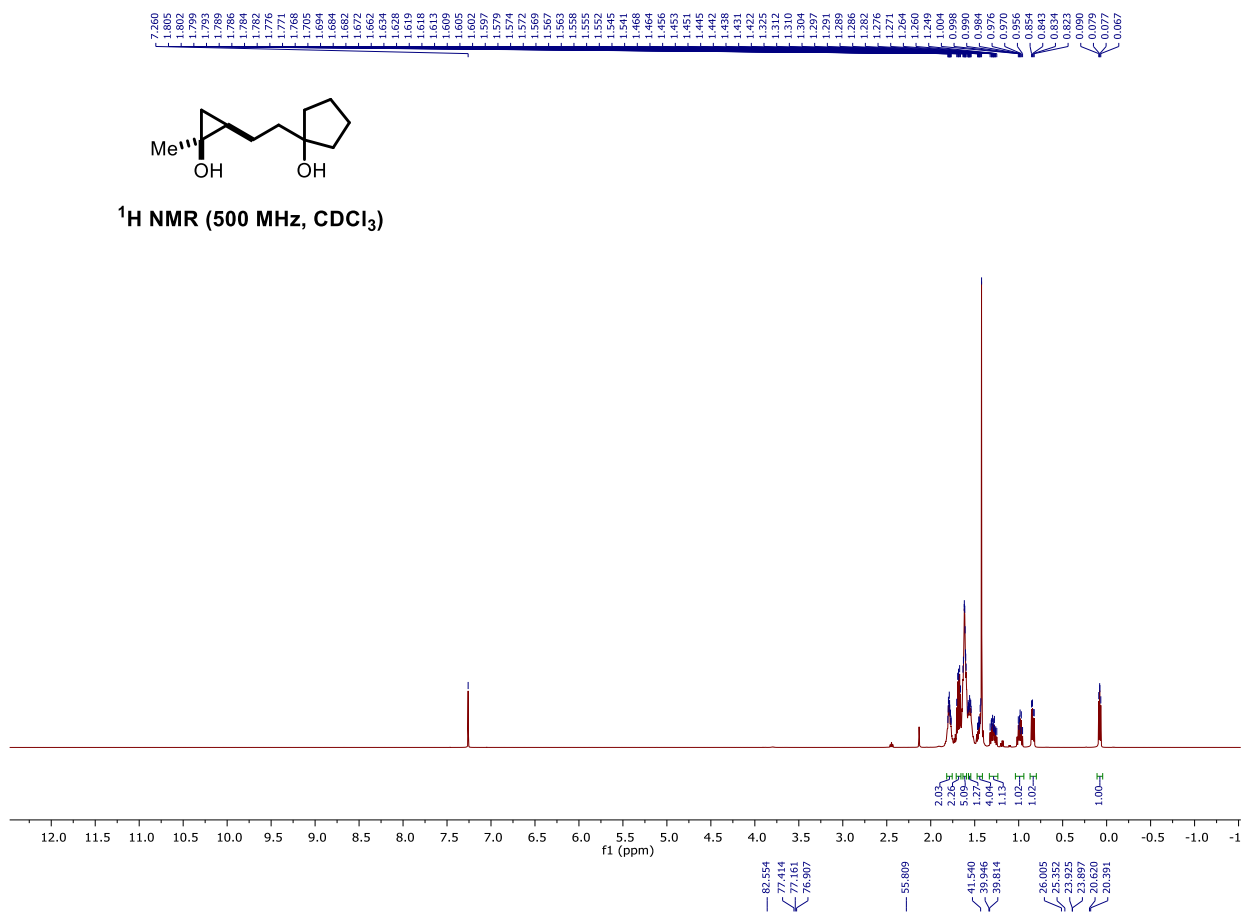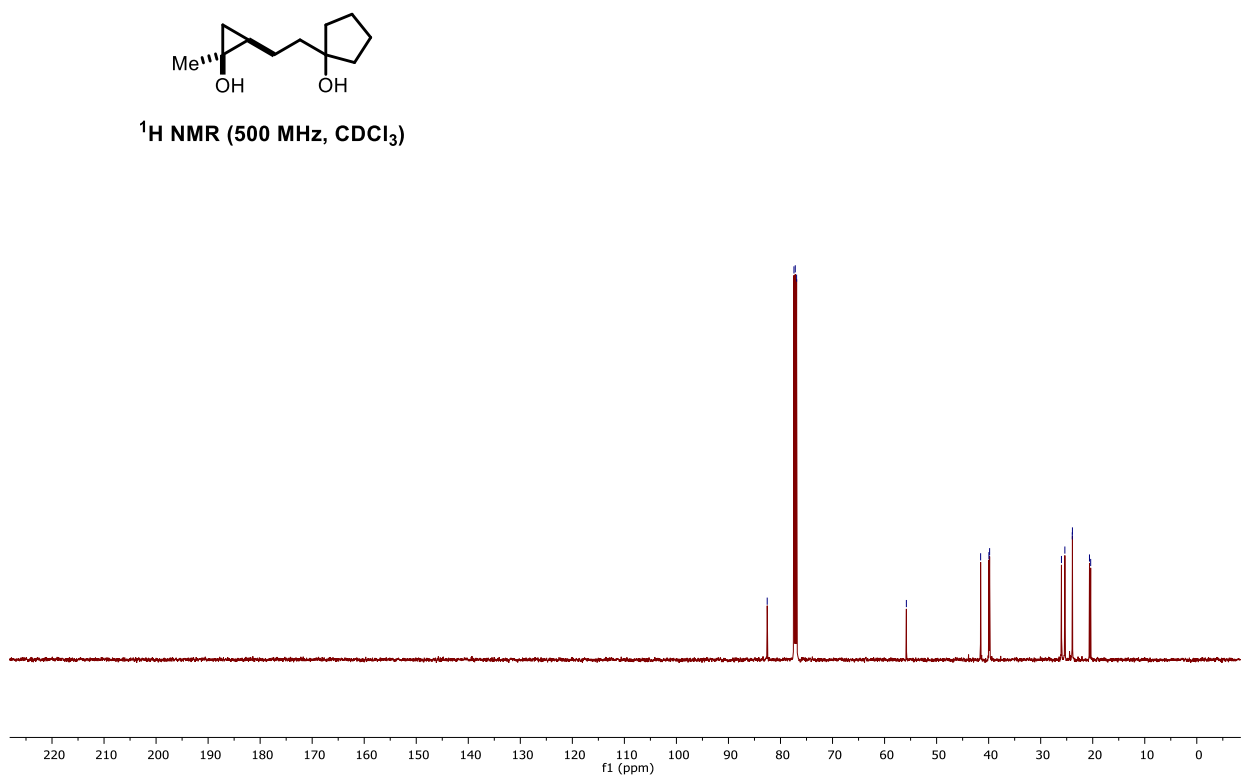

7.26  
1.60  
1.58  
1.57  
1.56  
1.55  
1.55  
1.54  
1.53  
1.52  
1.51  
1.51  
1.50  
1.48  
1.48  
1.47  
1.46  
1.45  
1.44  
1.43  
1.42  
1.41  
1.40  
1.40  
1.39  
1.38  
1.37  
1.36  
1.36  
1.35  
1.33  
1.29  
1.28  
1.27  
1.27  
1.26  
1.26  
1.25  
1.24  
1.24  
1.23  
1.23  
1.22  
1.21  
1.20  
1.18  
1.17  
0.97  
0.97  
0.96  
0.95  
0.94  
0.93  
0.83  
0.81  
0.07  
0.06  
0.05

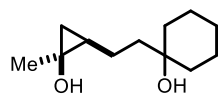

<sup>1</sup>H NMR (500 MHz, CDCl<sub>3</sub>)

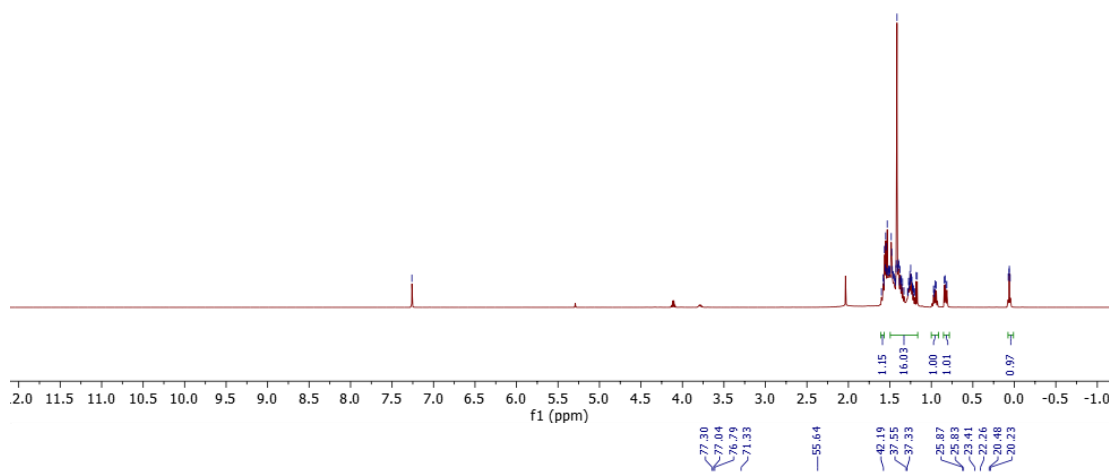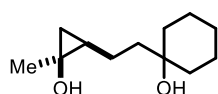

<sup>13</sup>C NMR (125 MHz, CDCl<sub>3</sub>)

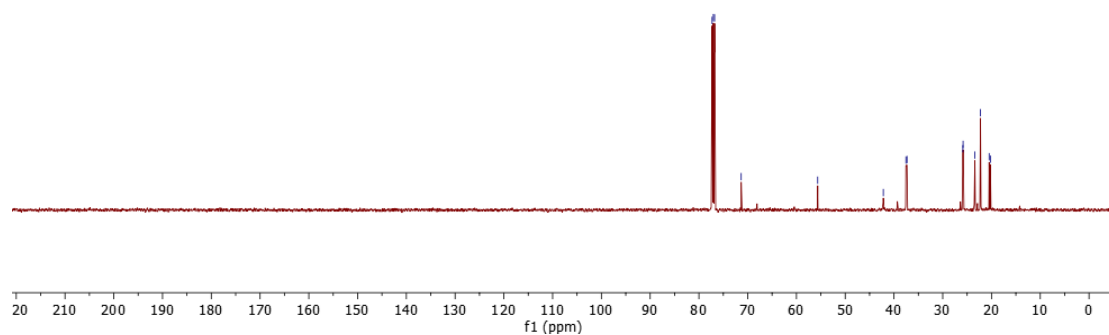

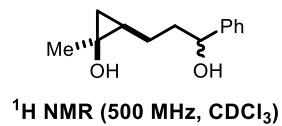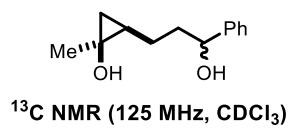

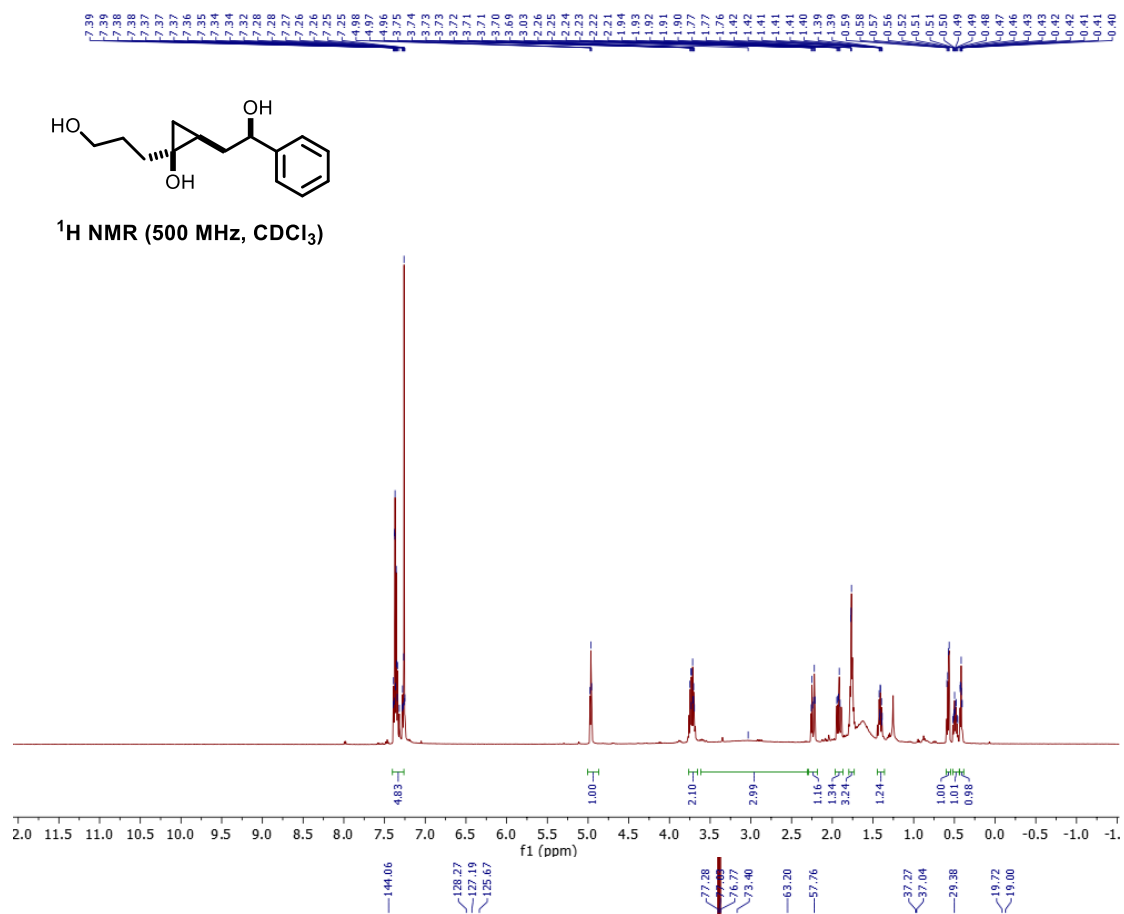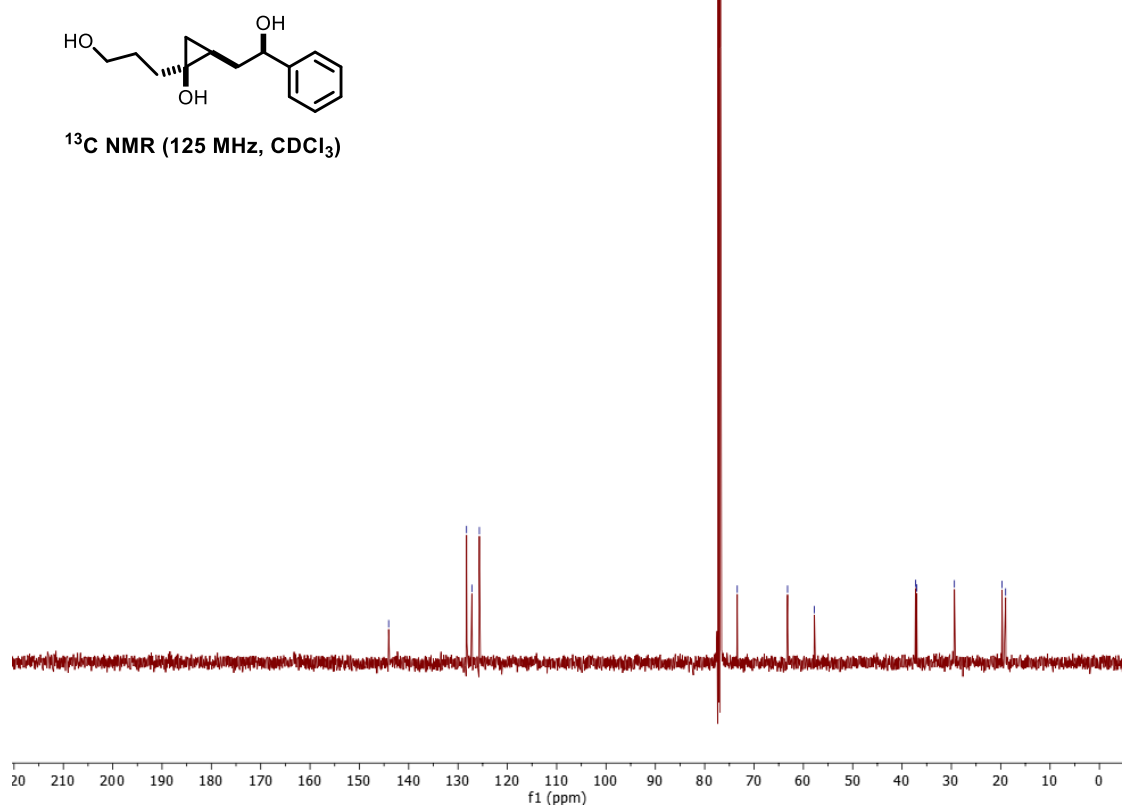

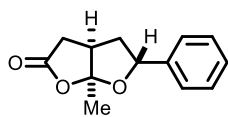

<sup>1</sup>H NMR (500 MHz, CDCl<sub>3</sub>)

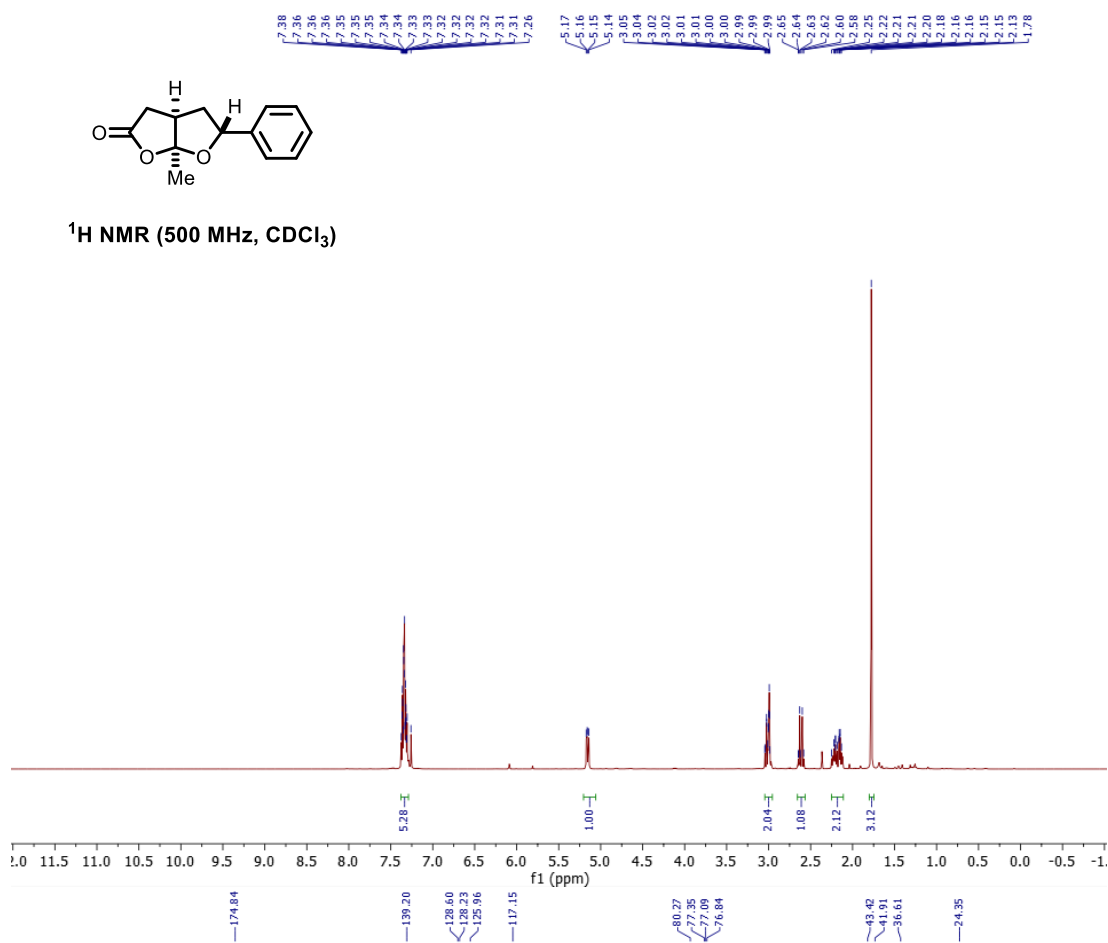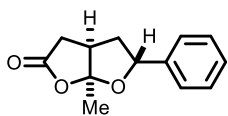

<sup>13</sup>C NMR (125 MHz, CDCl<sub>3</sub>)

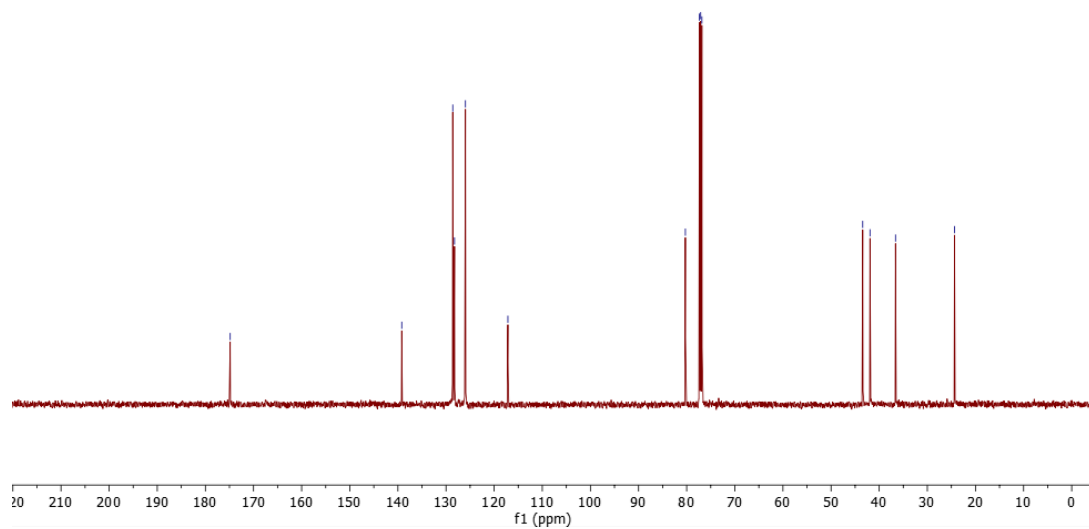

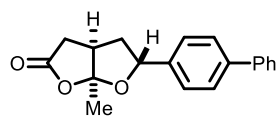

<sup>1</sup>H NMR (500 MHz, CDCl<sub>3</sub>)

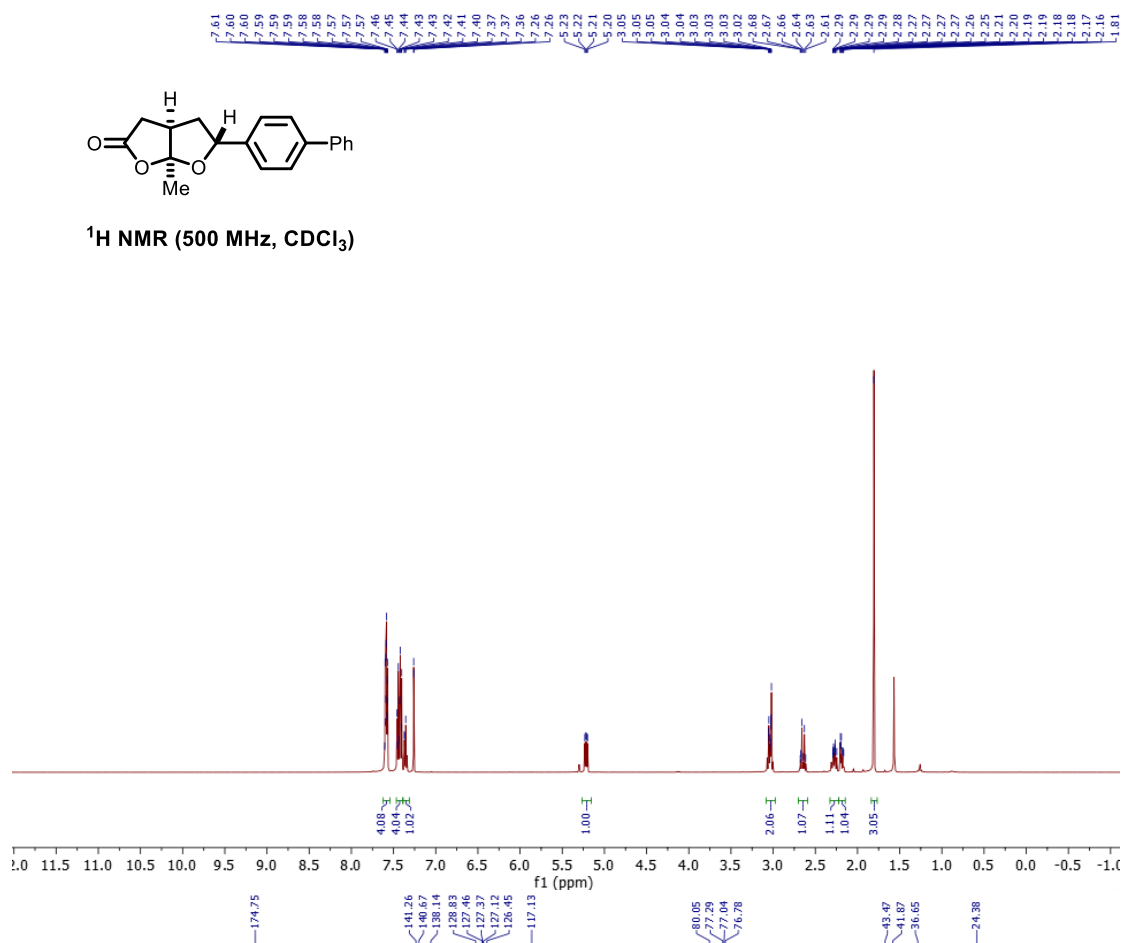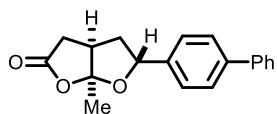

<sup>13</sup>C NMR (125 MHz, CDCl<sub>3</sub>)

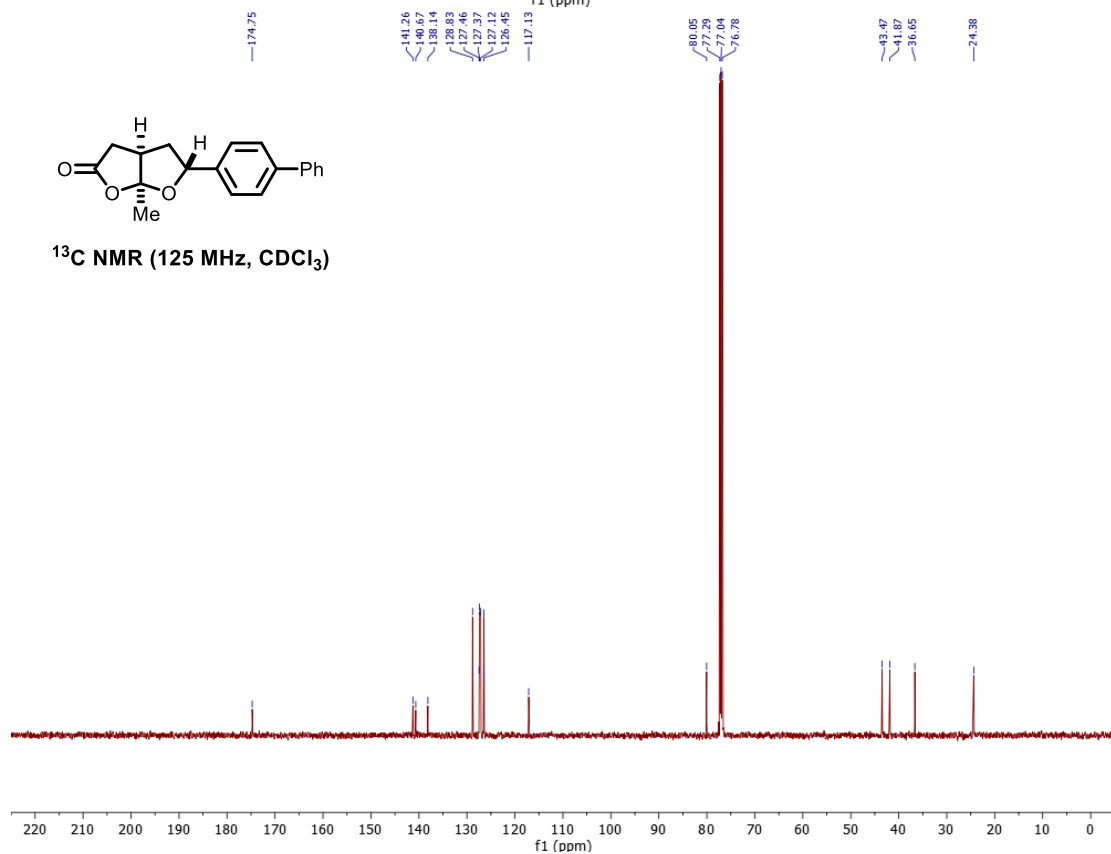

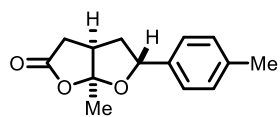

<sup>1</sup>H NMR (500 MHz, CDCl<sub>3</sub>)

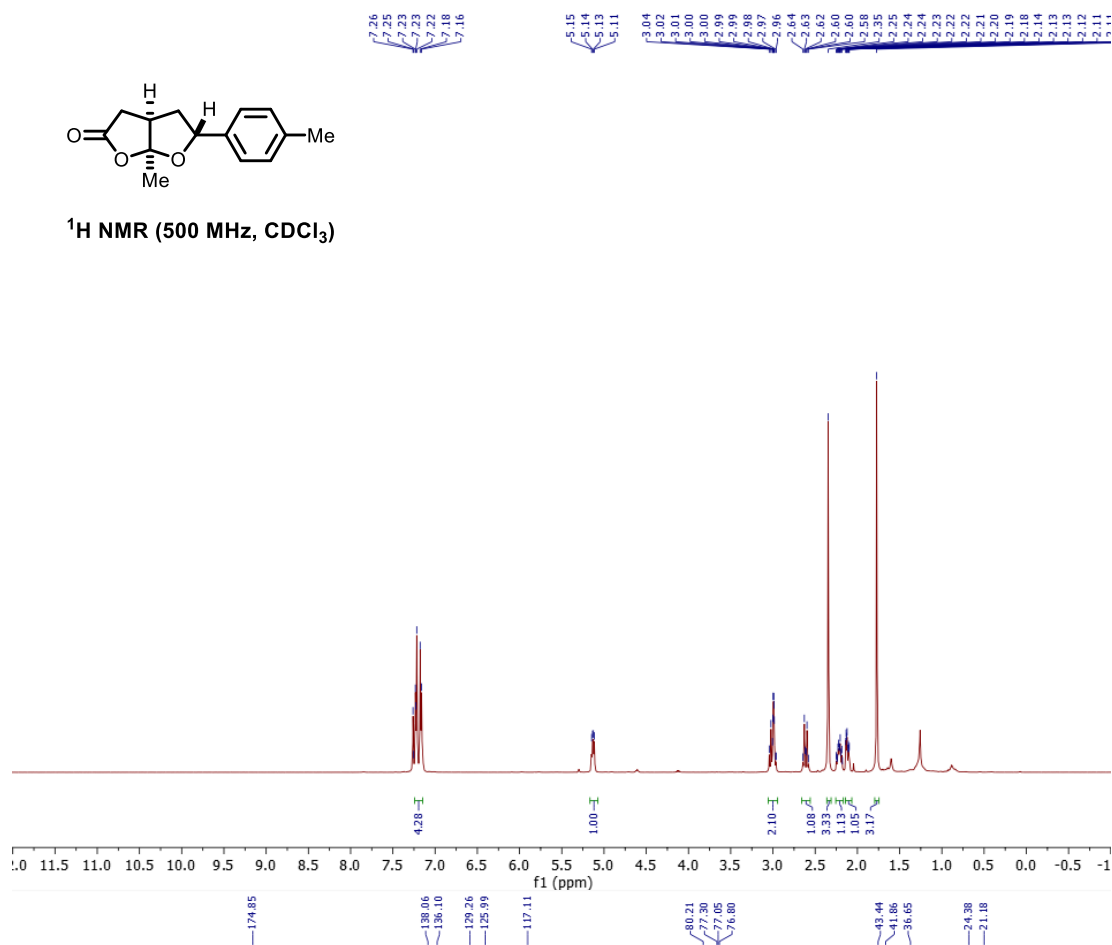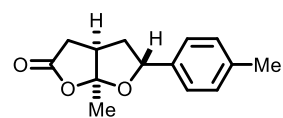

<sup>13</sup>C NMR (125 MHz, CDCl<sub>3</sub>)

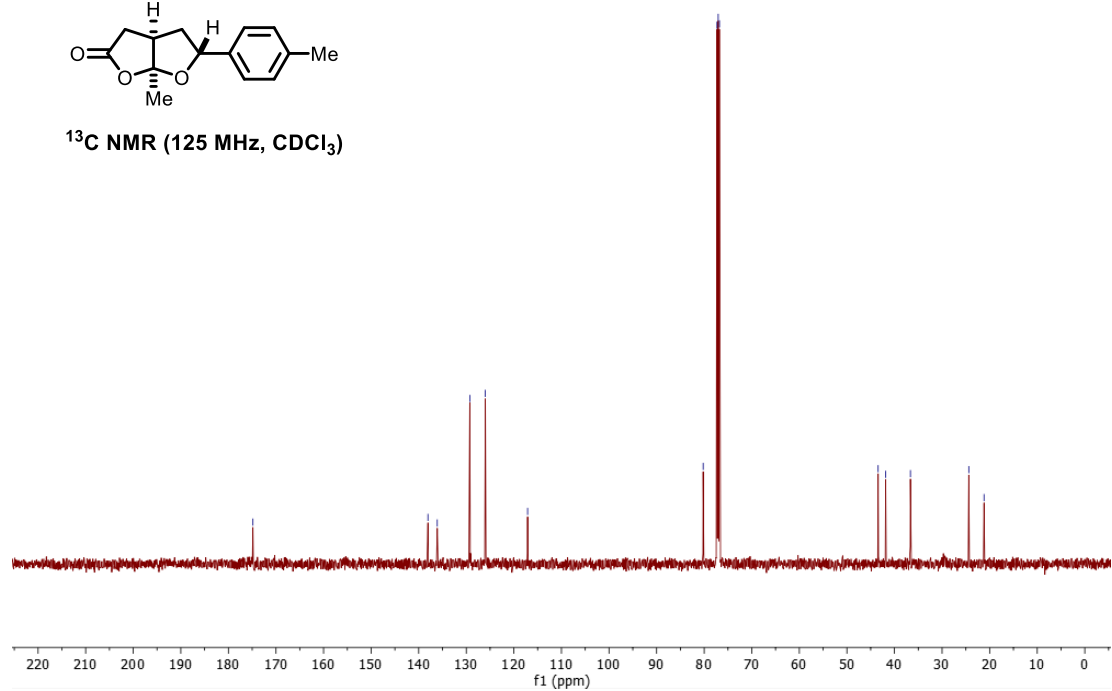

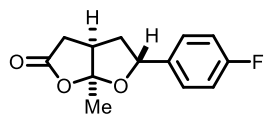

$^1\text{H}$  NMR (500 MHz,  $\text{CDCl}_3$ )

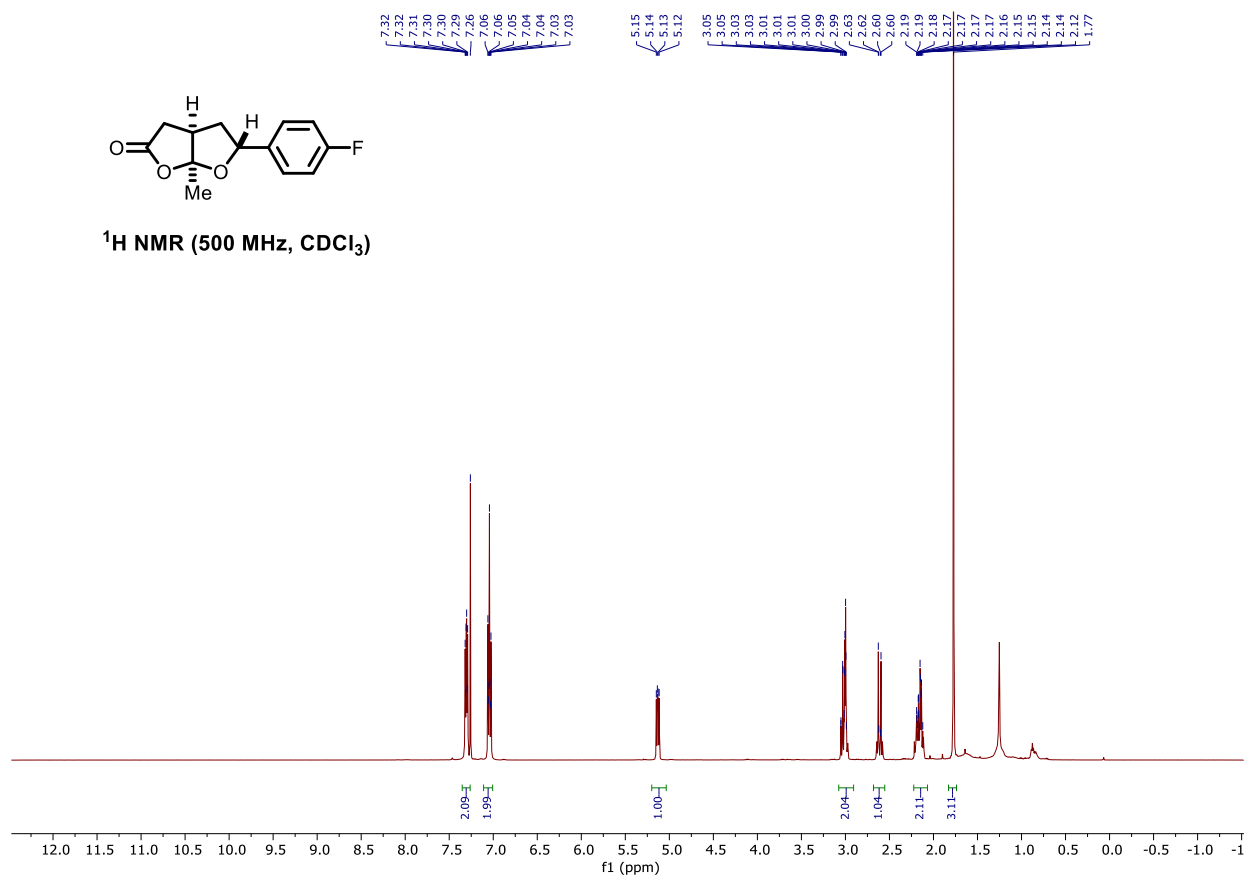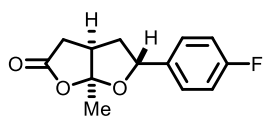

$^{13}\text{C}$  NMR (125 MHz,  $\text{CDCl}_3$ )

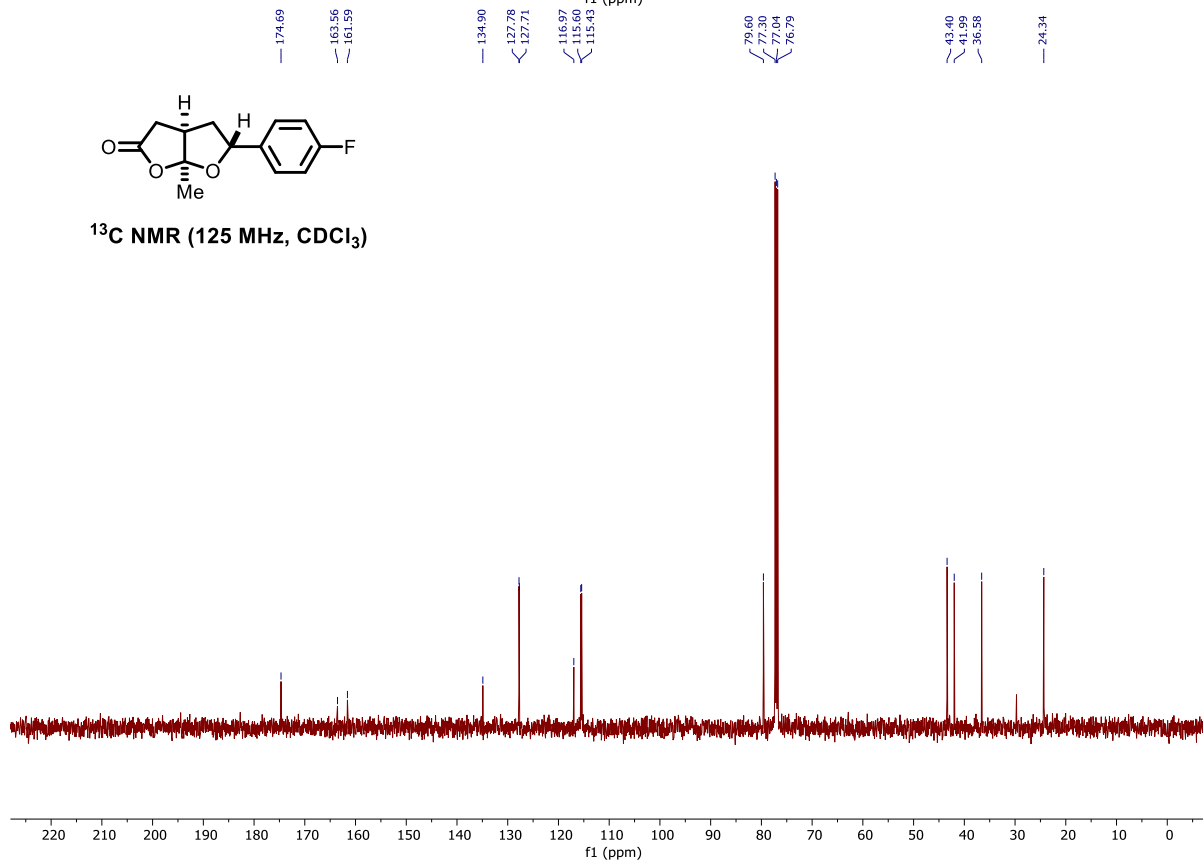

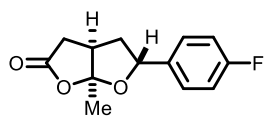

**$^{19}\text{F}$  NMR (471 MHz,  $\text{CDCl}_3$ )**

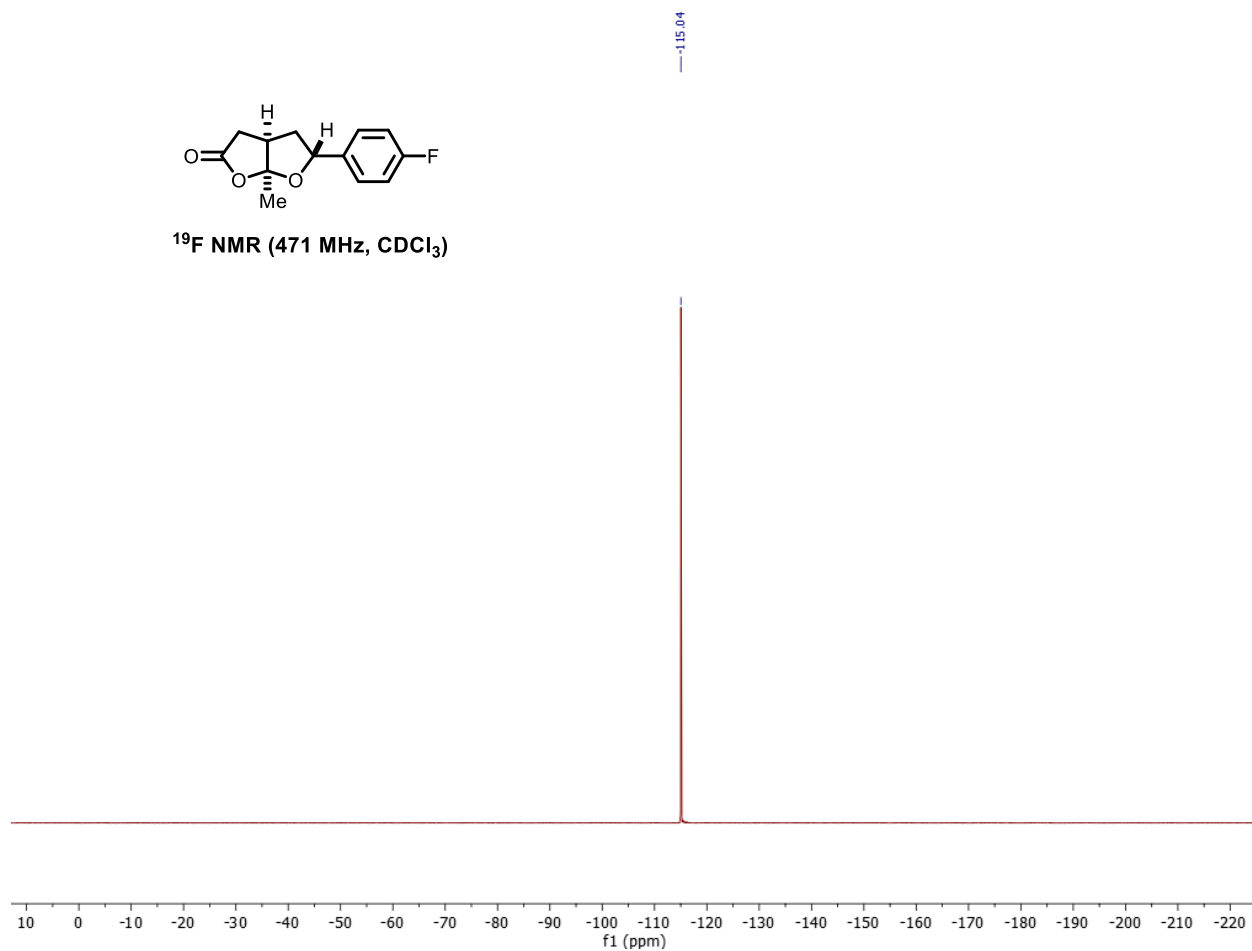

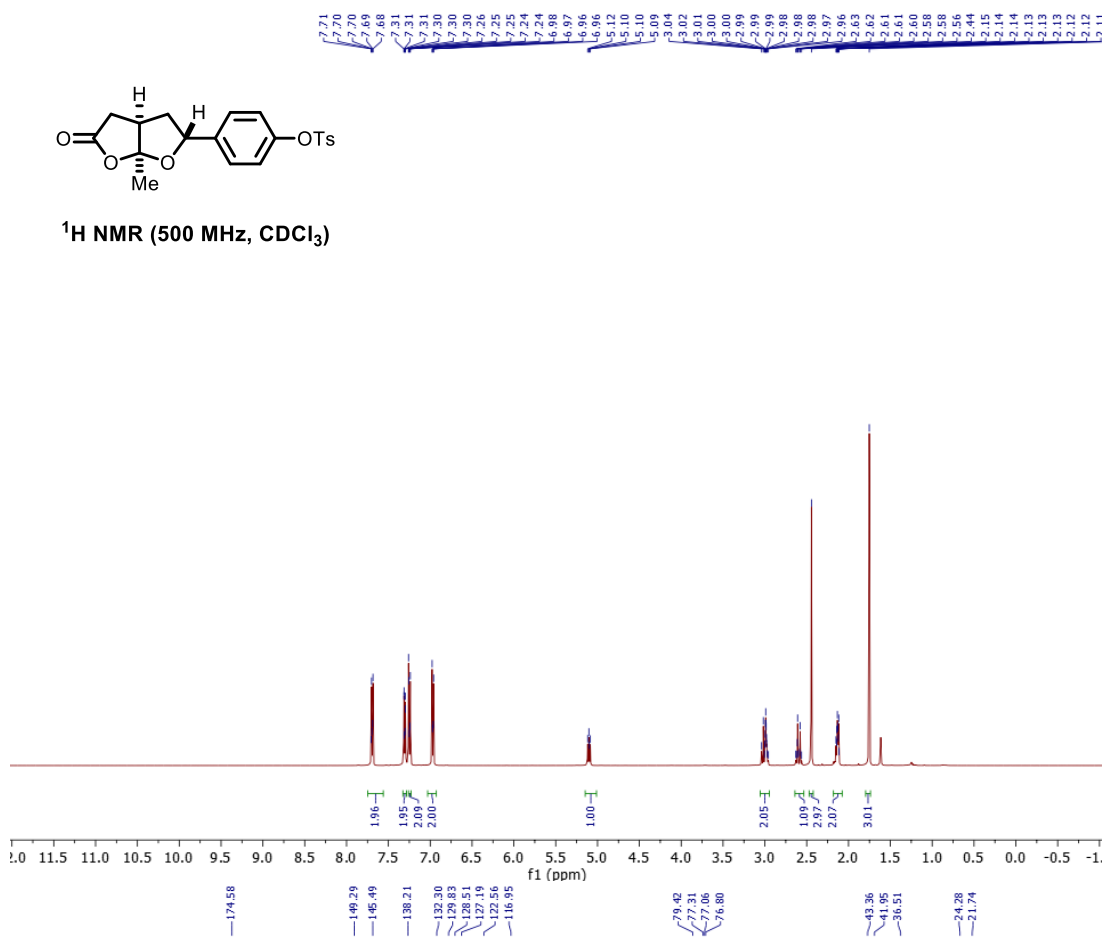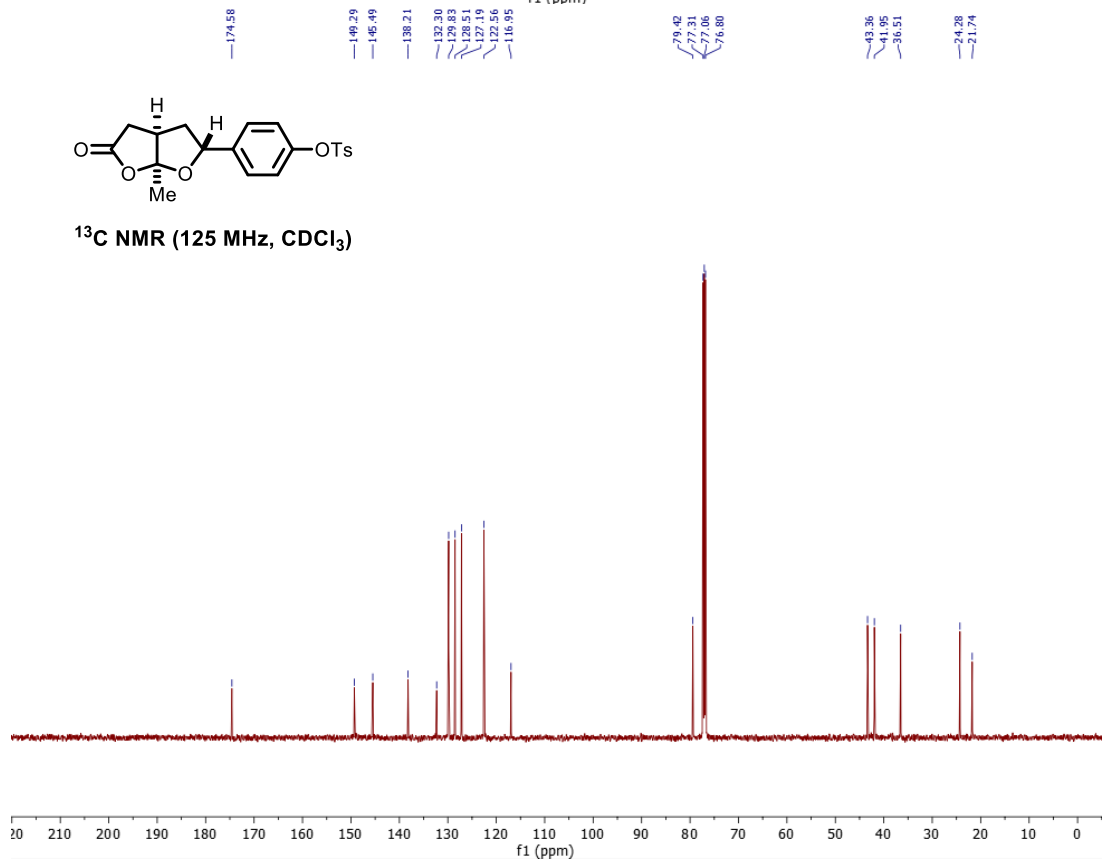



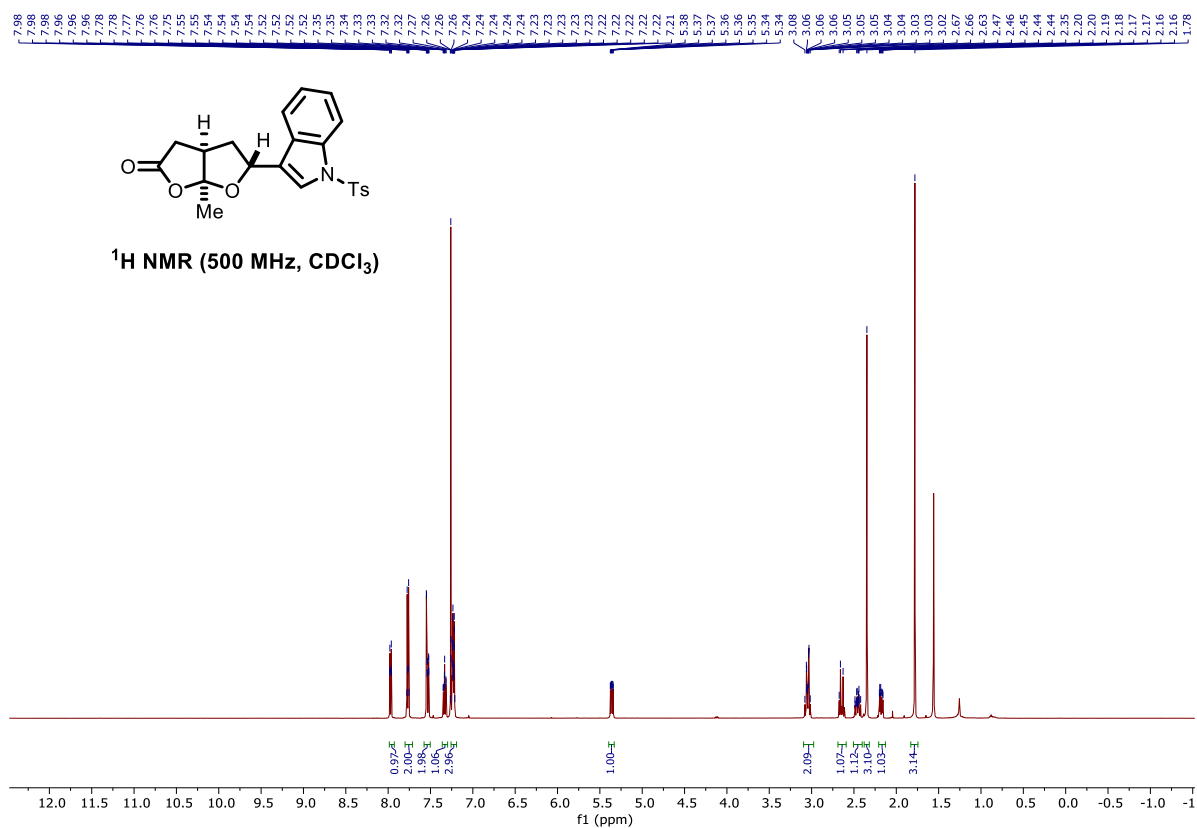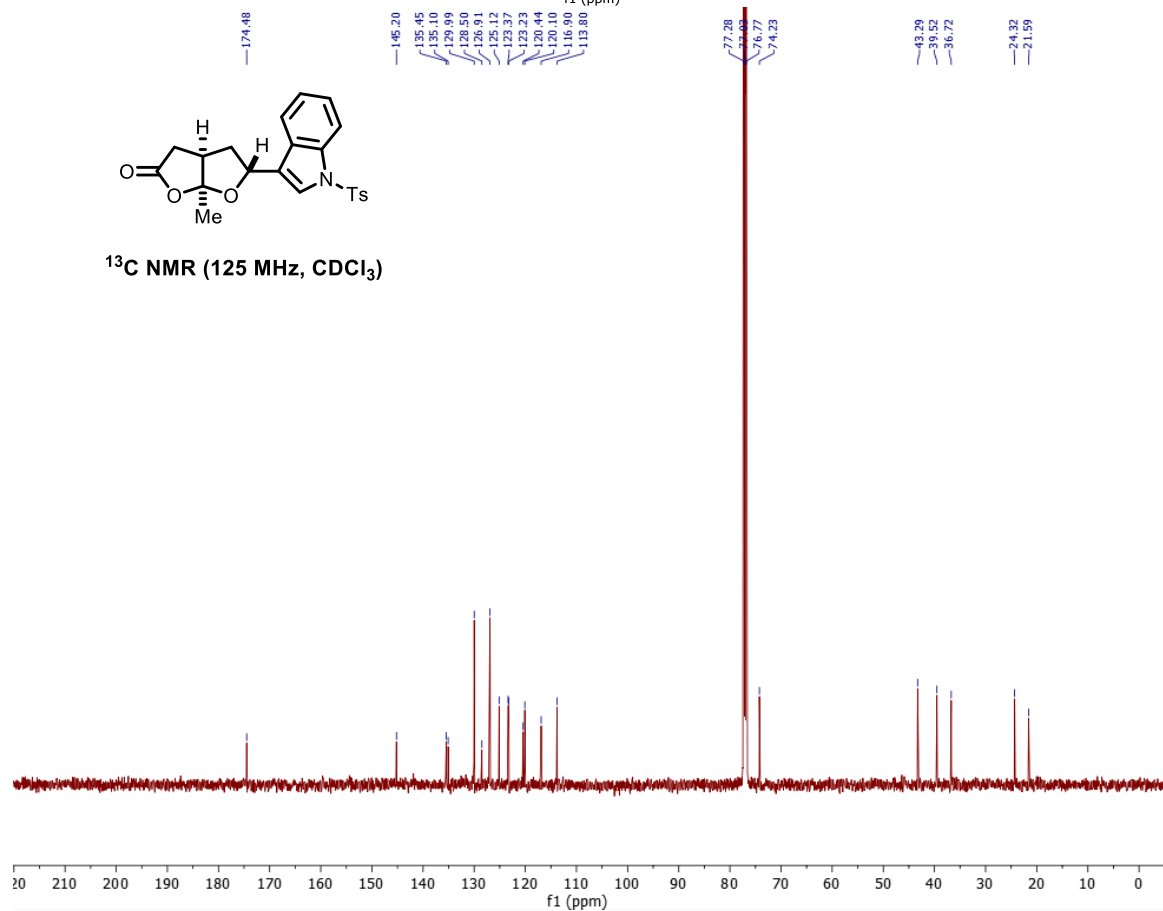

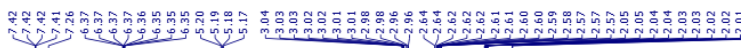

<sup>1</sup>H NMR spectrum (CDCl<sub>3</sub>) of compound 10. The x-axis represents the chemical shift in ppm, ranging from 12.0 to -1.0. The spectrum shows several peaks, with integration values indicated below the baseline. The peaks are labeled with their chemical shifts and corresponding integration values:

- 7.20 ppm (integral 0.97)
- 6.20 ppm (integral 2.00)
- 5.10 ppm (integral 1.00)
- 2.80 ppm (integral 2.04)
- 2.50 ppm (integral 2.17)
- 1.90 ppm (integral 1.09)
- 1.50 ppm (integral 3.16)
- 1.20 ppm (integral 0.00)

The solvent peaks for CDCl<sub>3</sub> are visible at 77.0, 77.1, and 77.2 ppm.

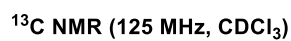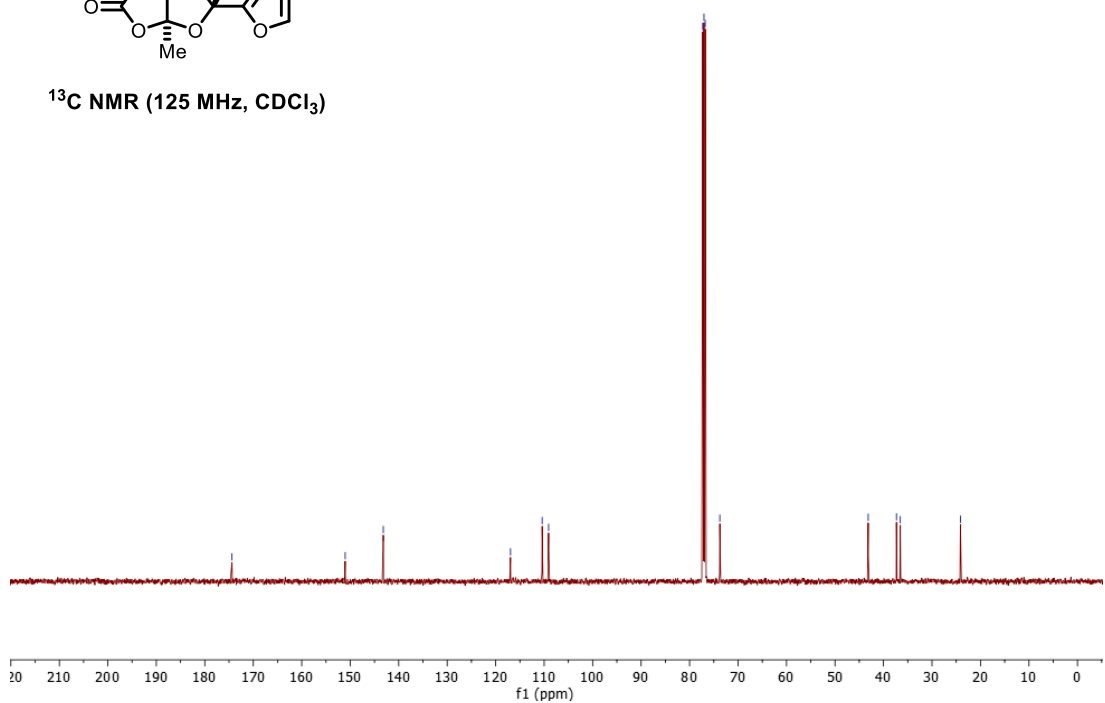

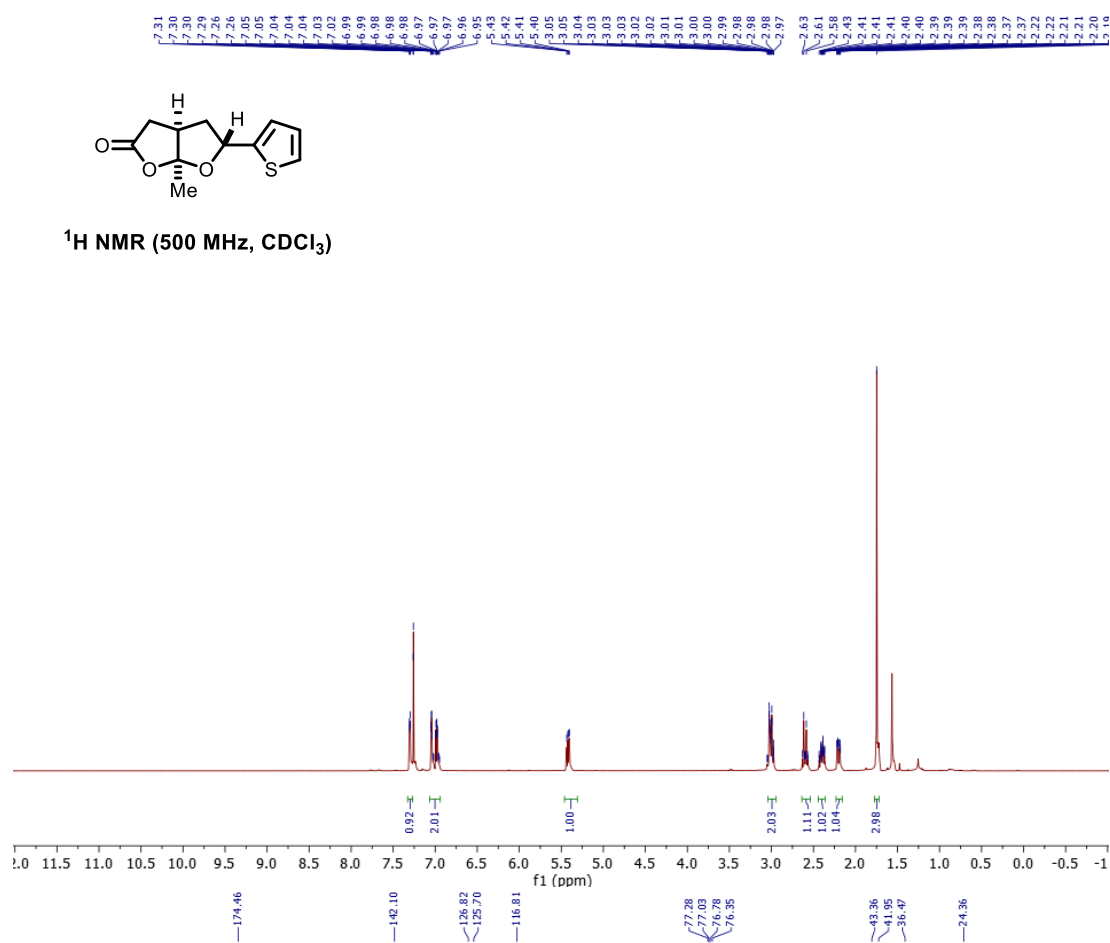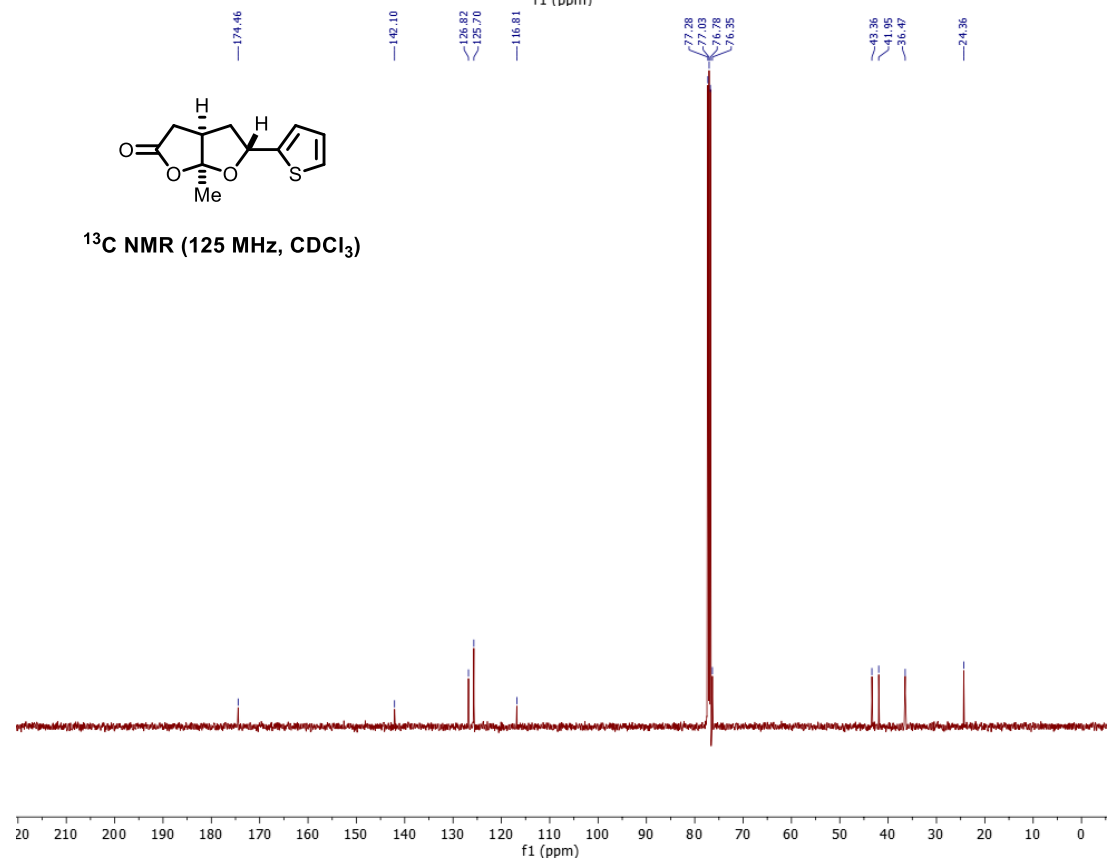

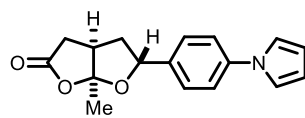

<sup>1</sup>H NMR (500 MHz, CDCl<sub>3</sub>)

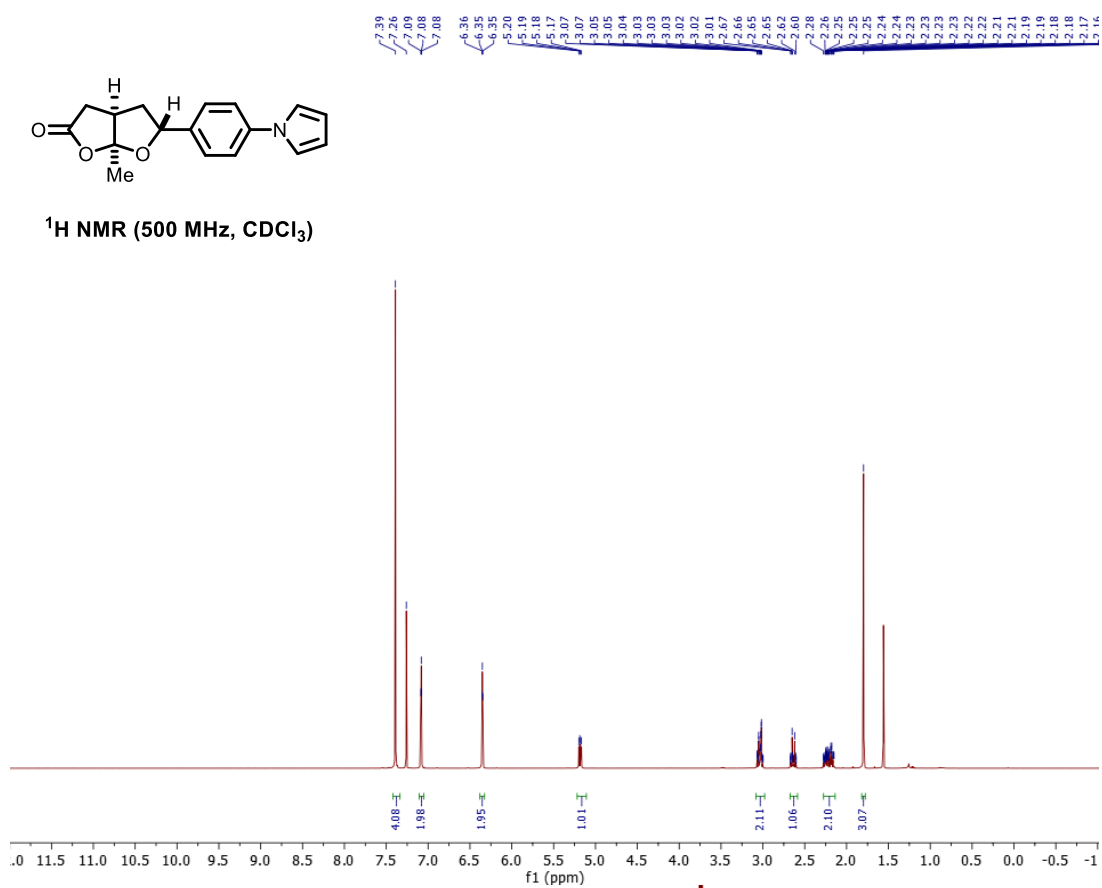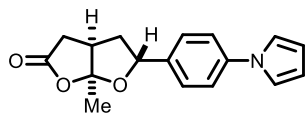

<sup>13</sup>C NMR (125 MHz, CDCl<sub>3</sub>)

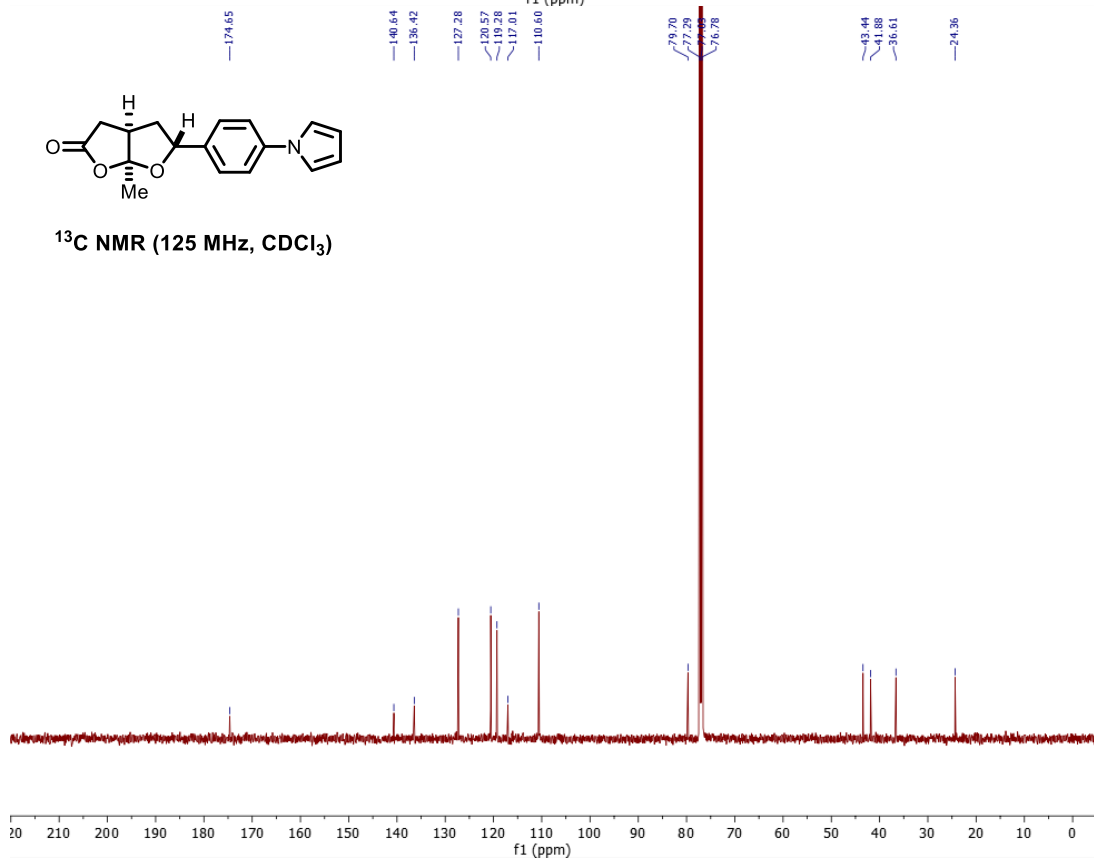

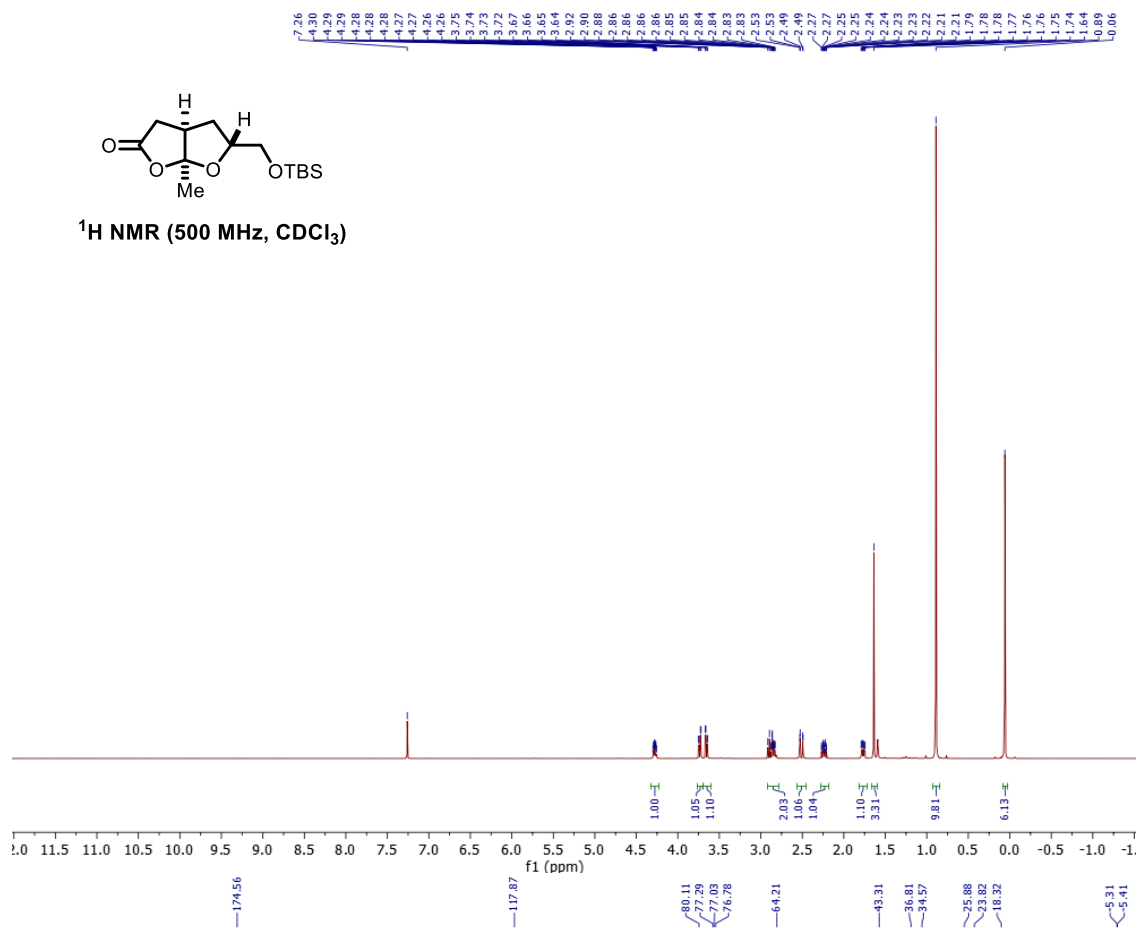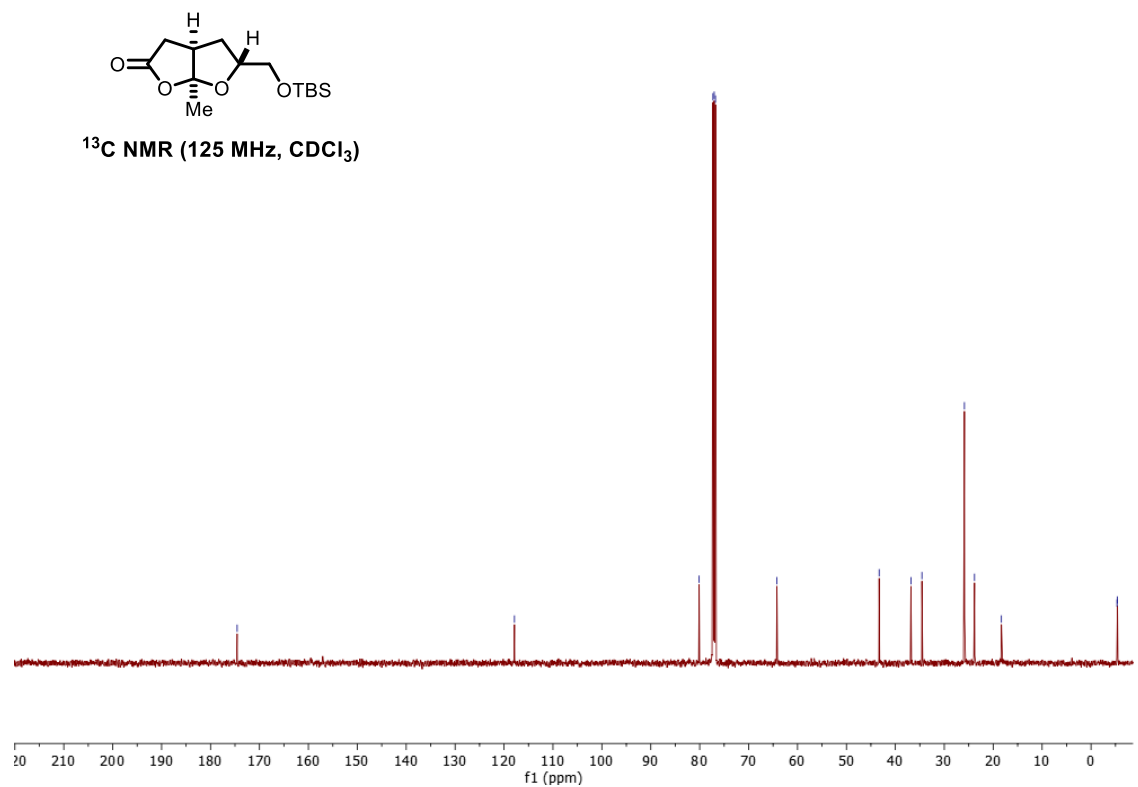

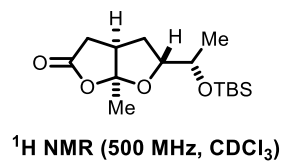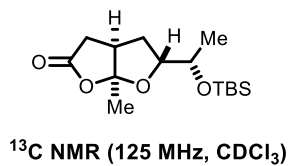

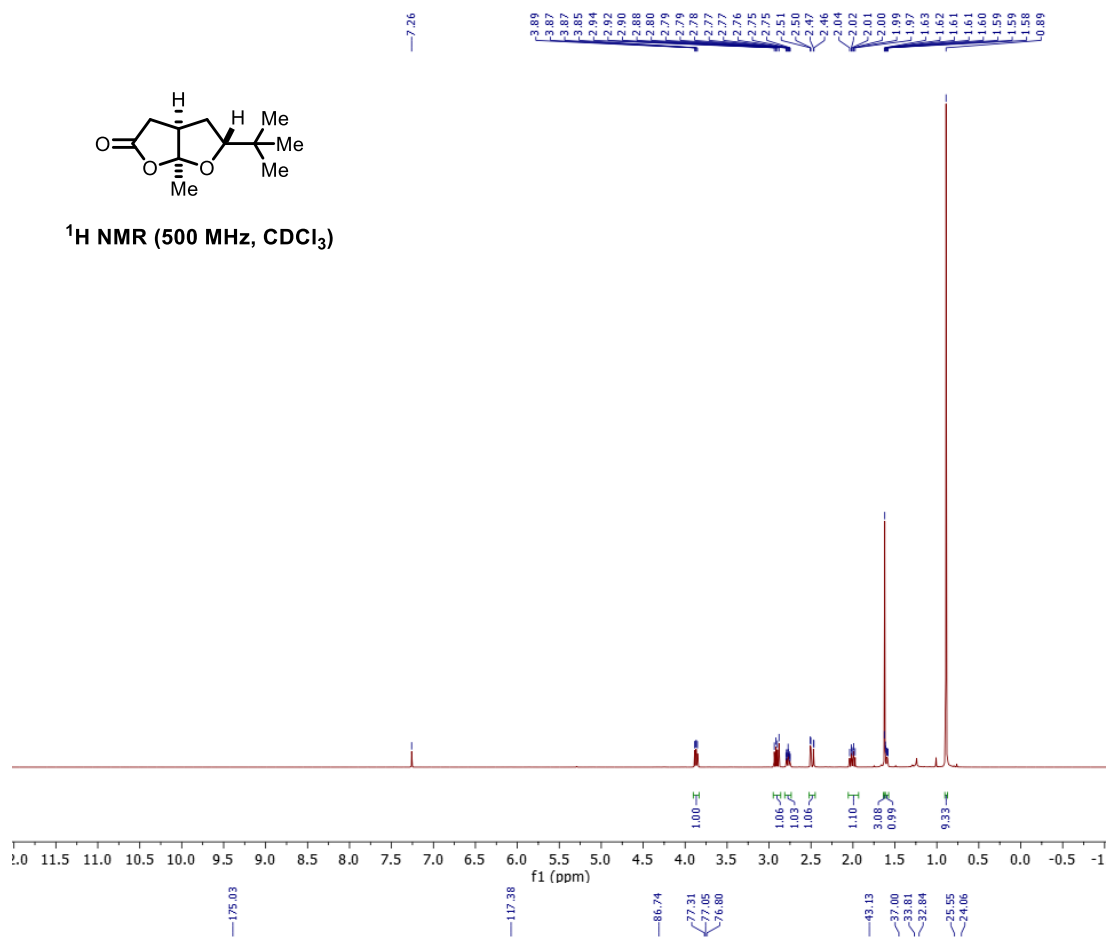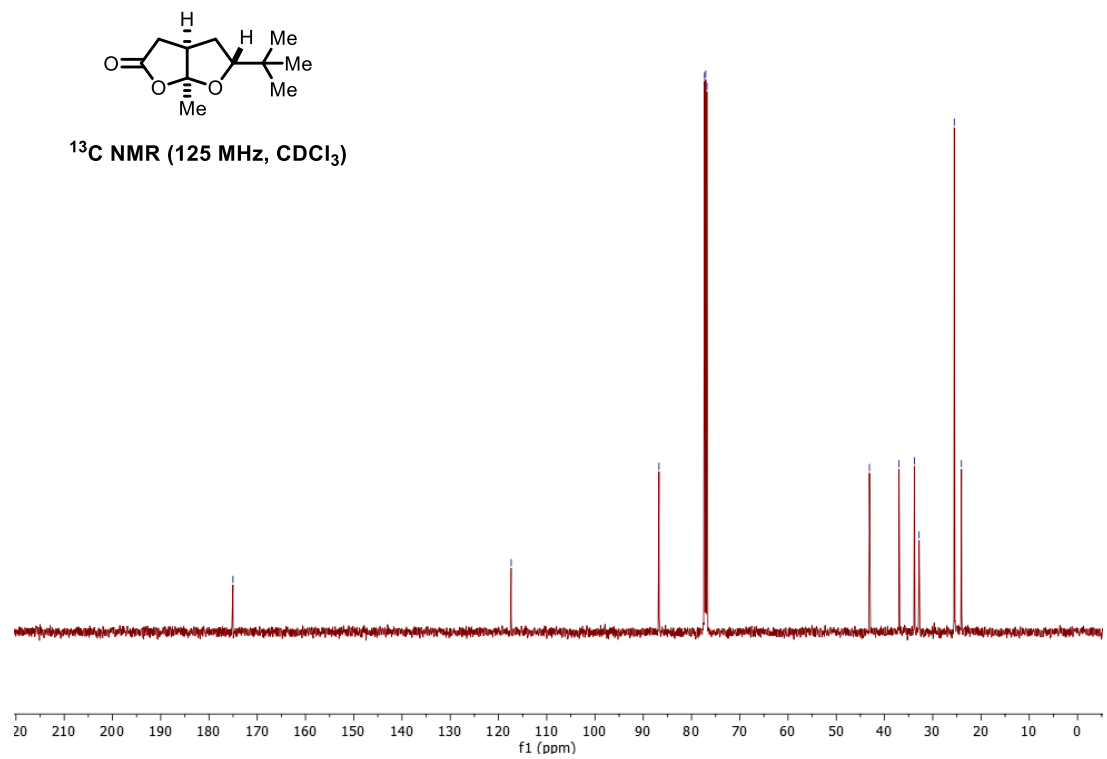





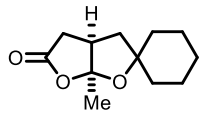

<sup>1</sup>H NMR (500 MHz, CDCl<sub>3</sub>)

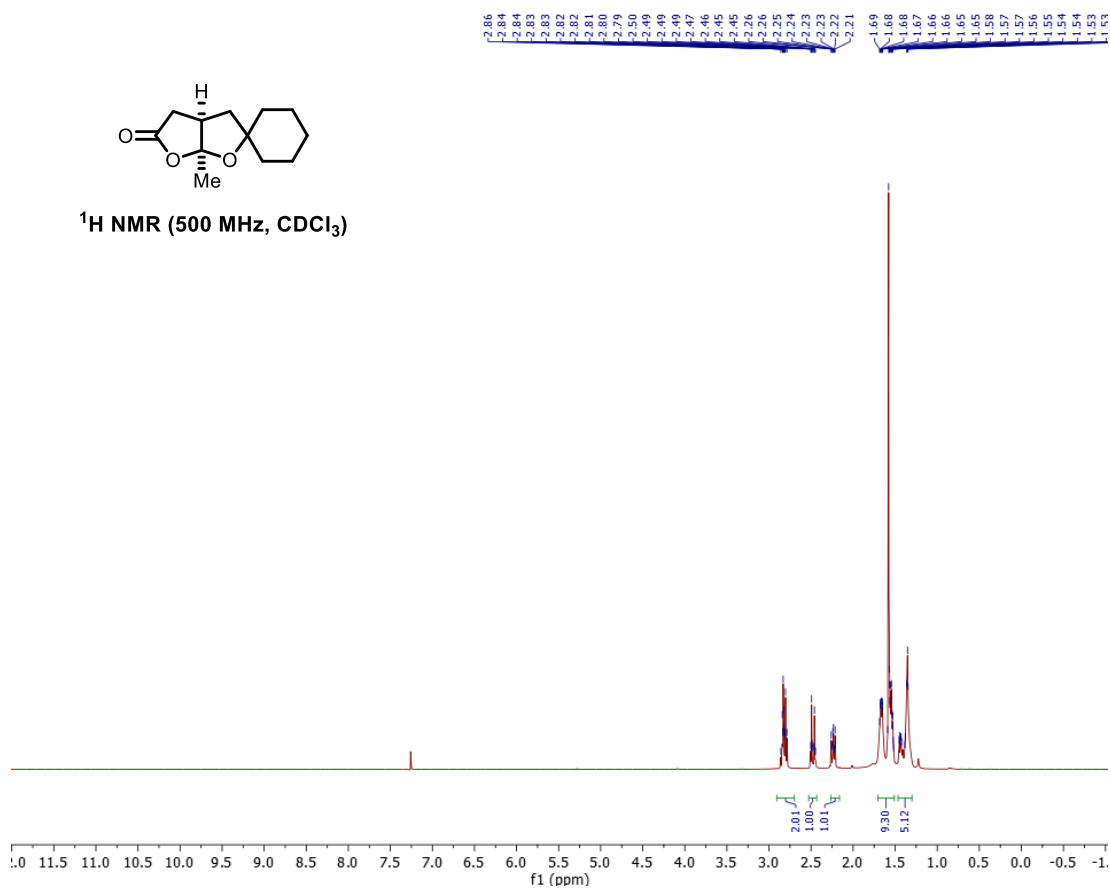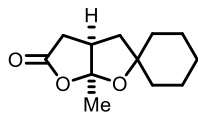

<sup>13</sup>C NMR (125 MHz, CDCl<sub>3</sub>)

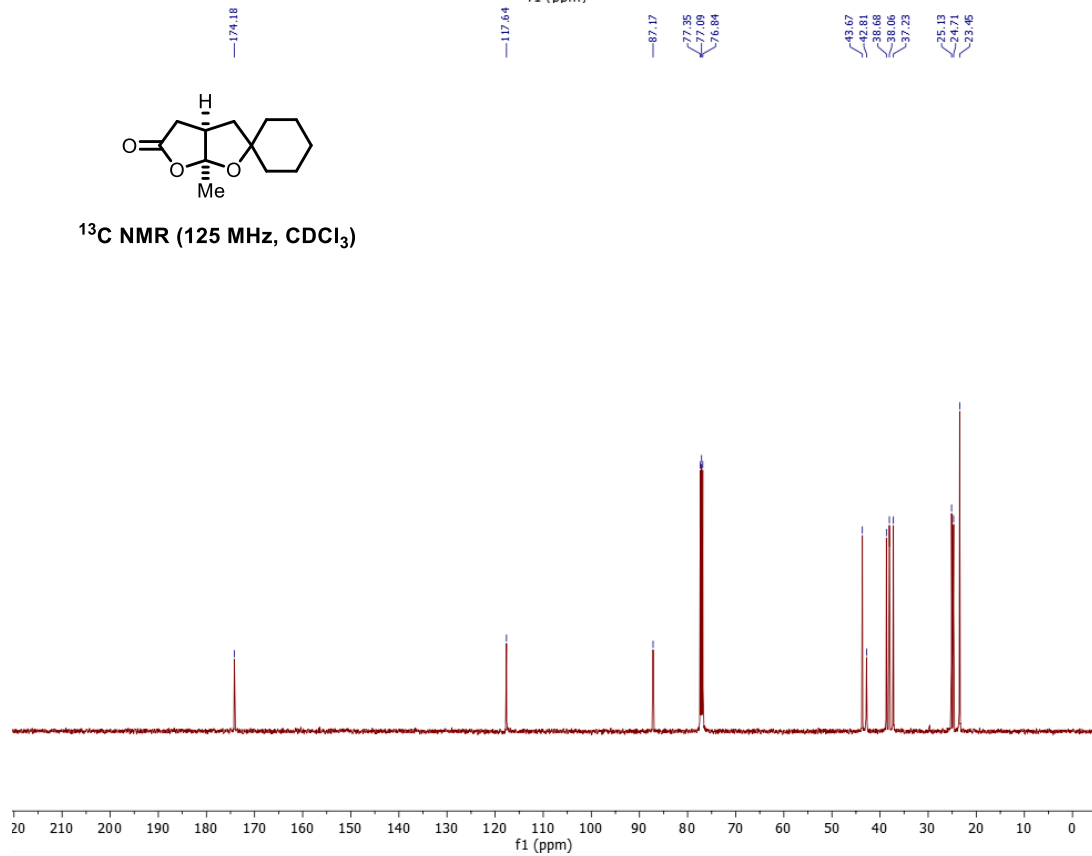

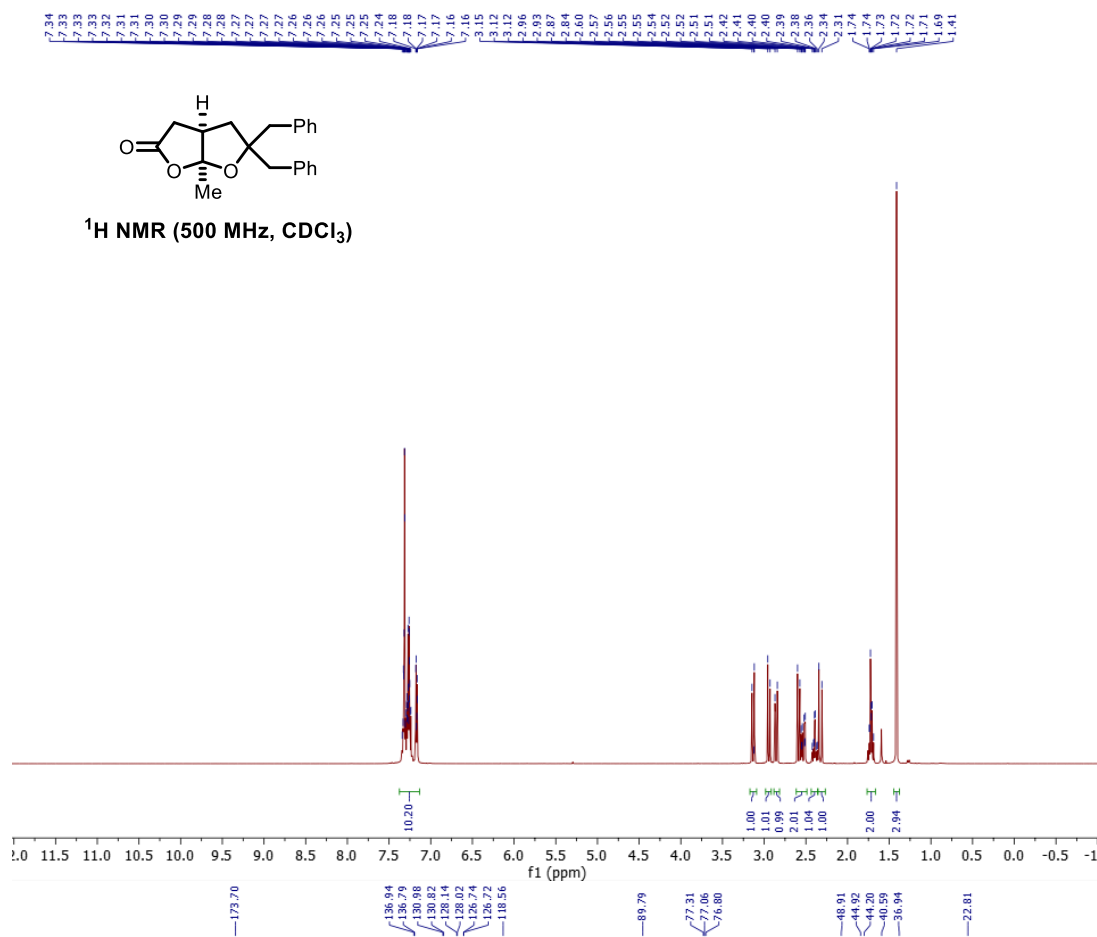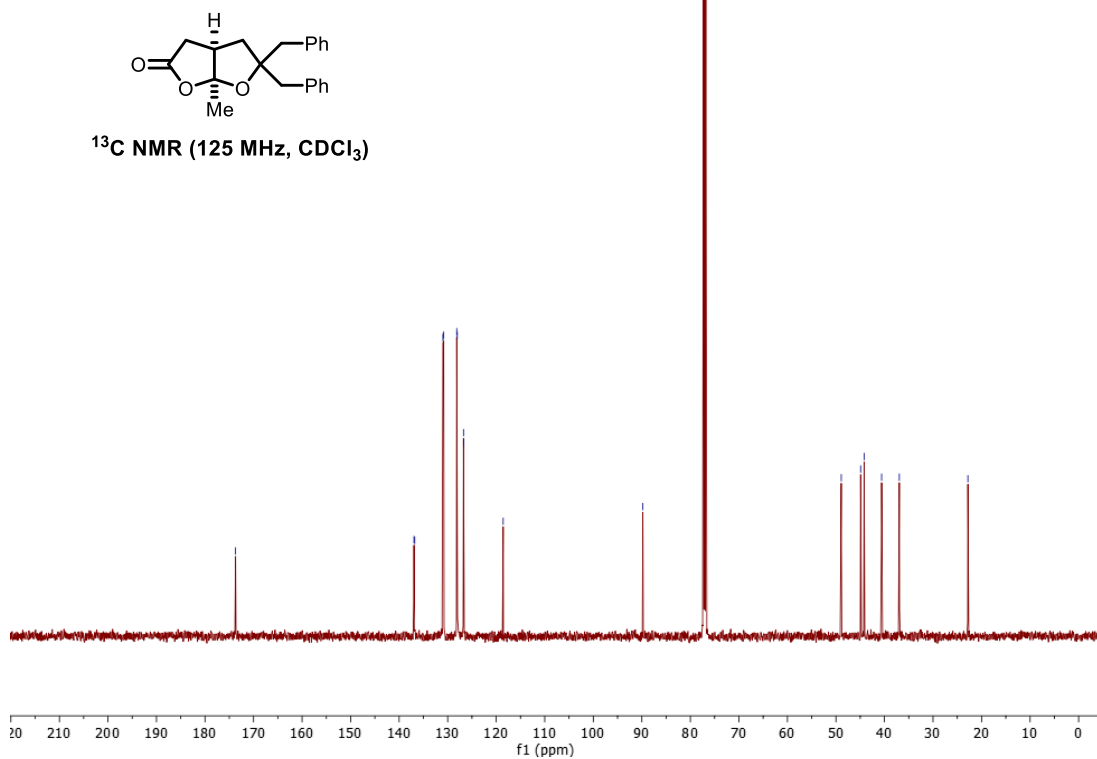

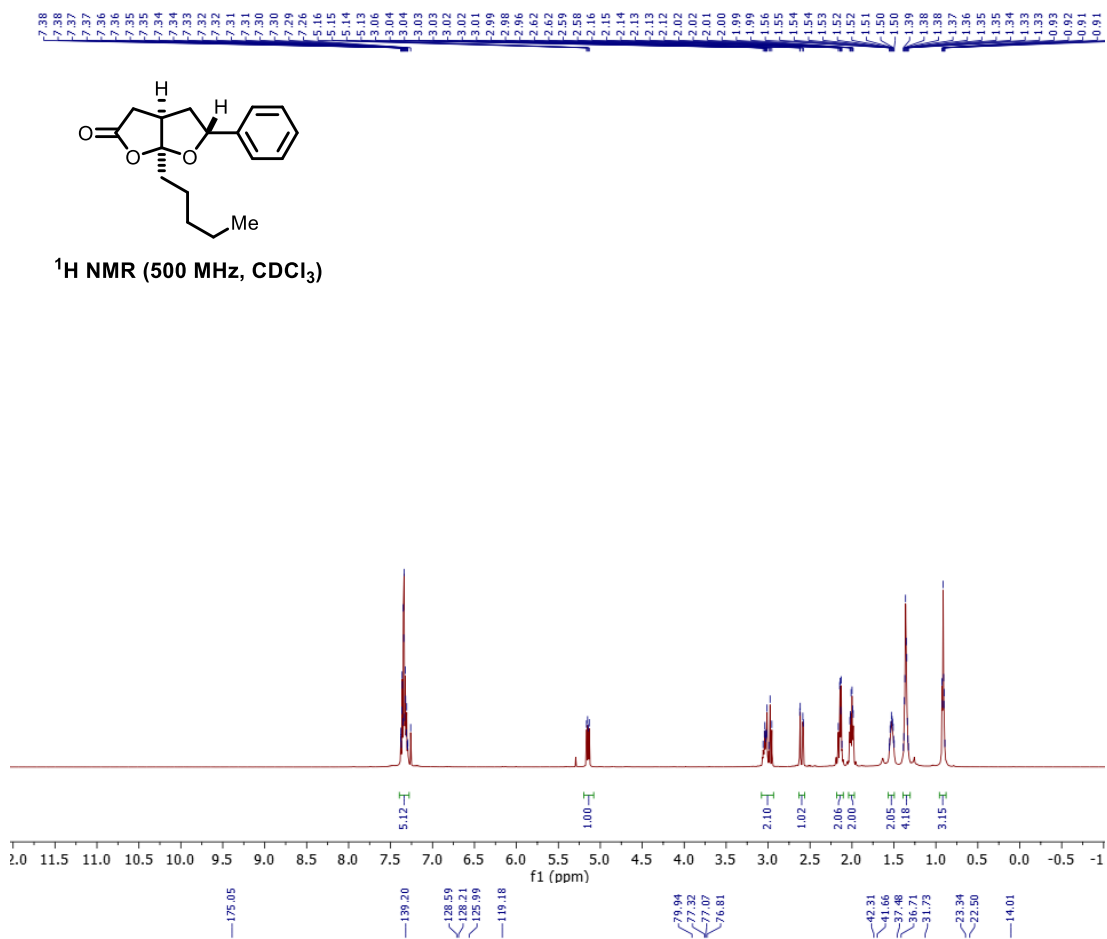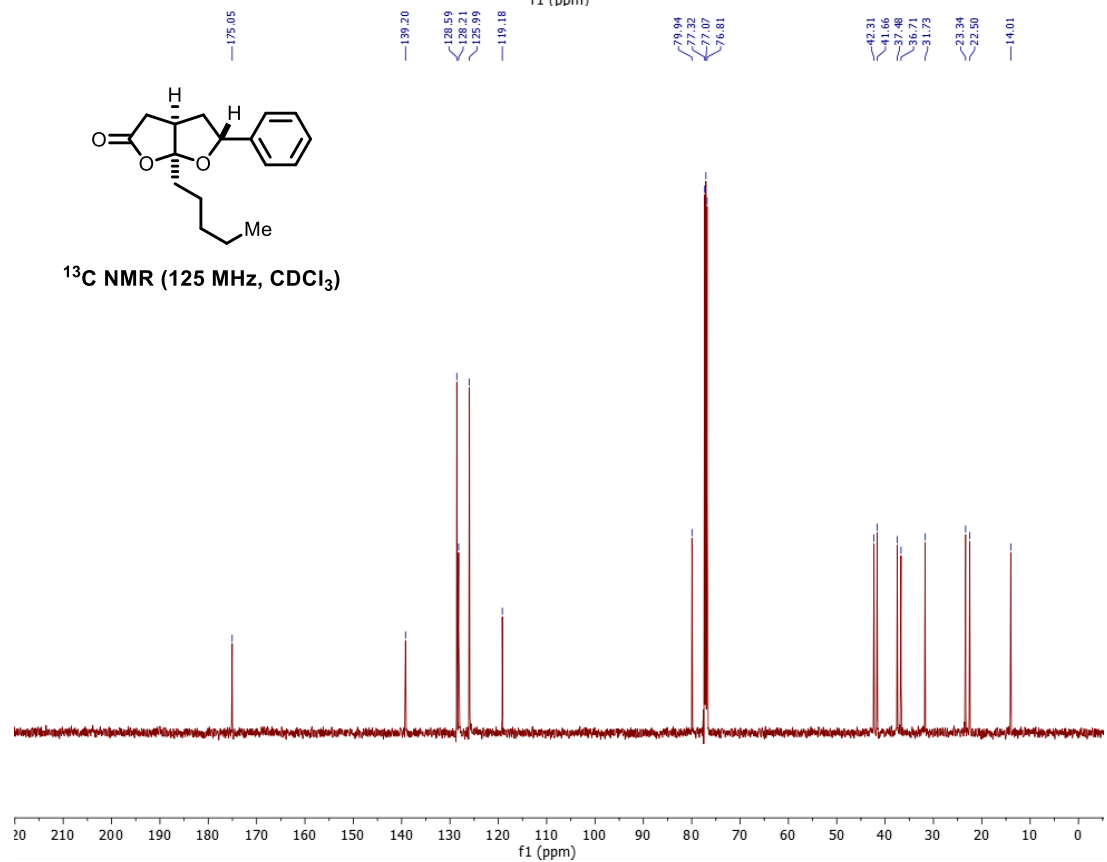

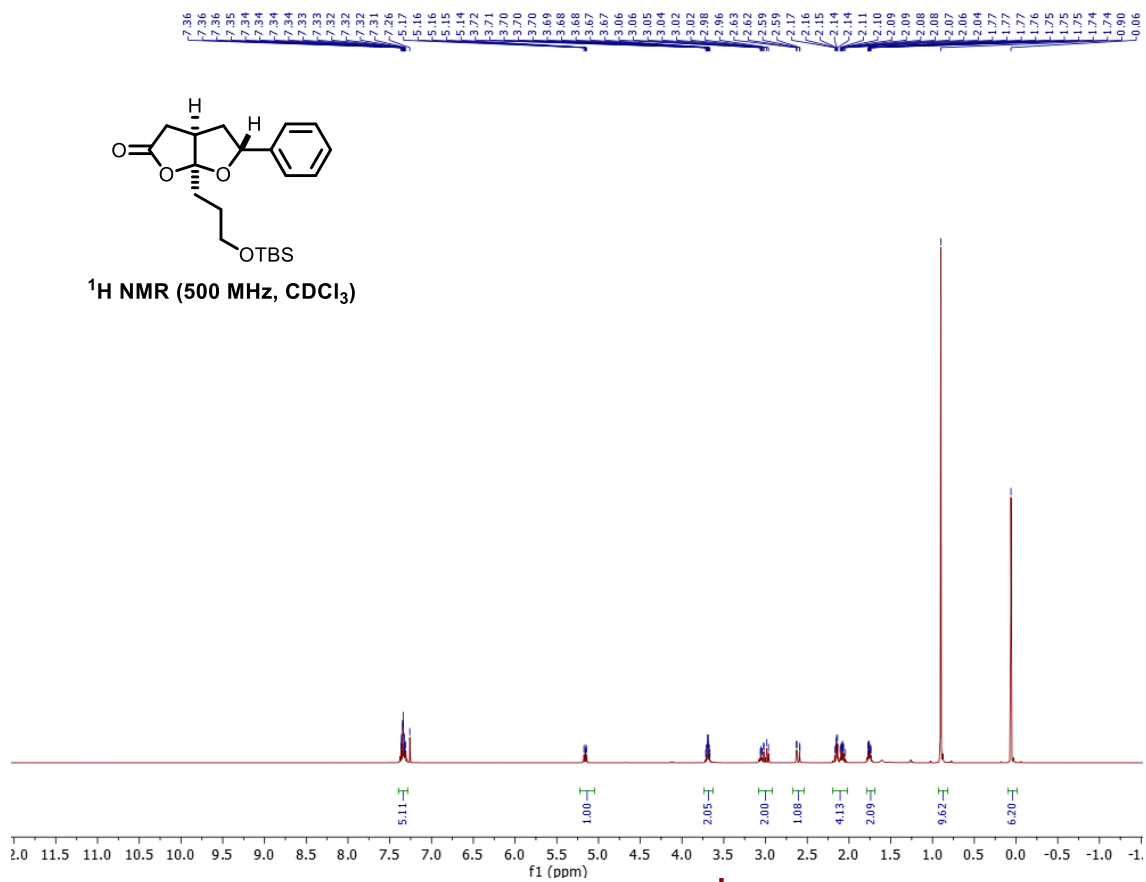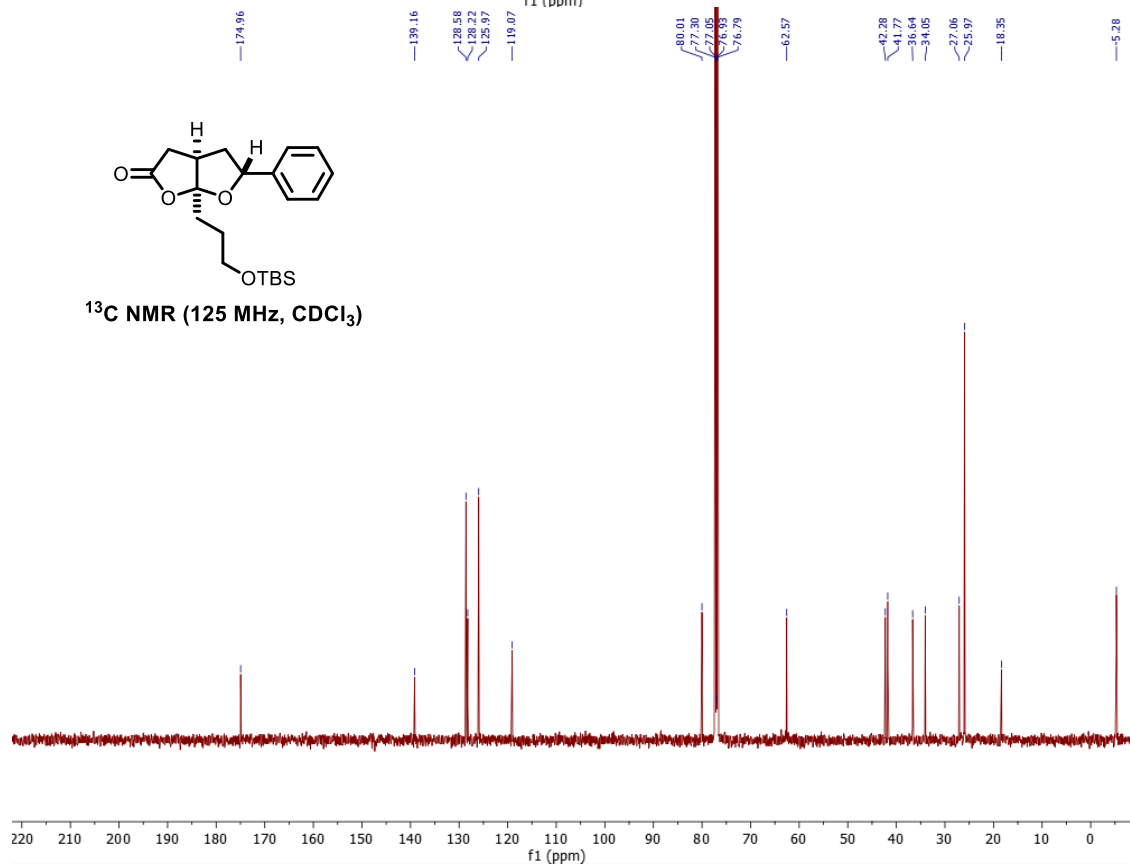

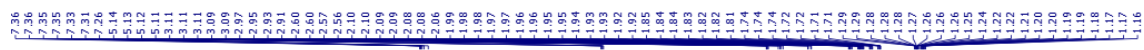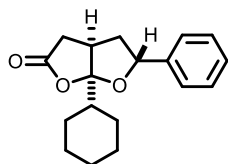

$^1\text{H}$  NMR (500 MHz,  $\text{CDCl}_3$ )

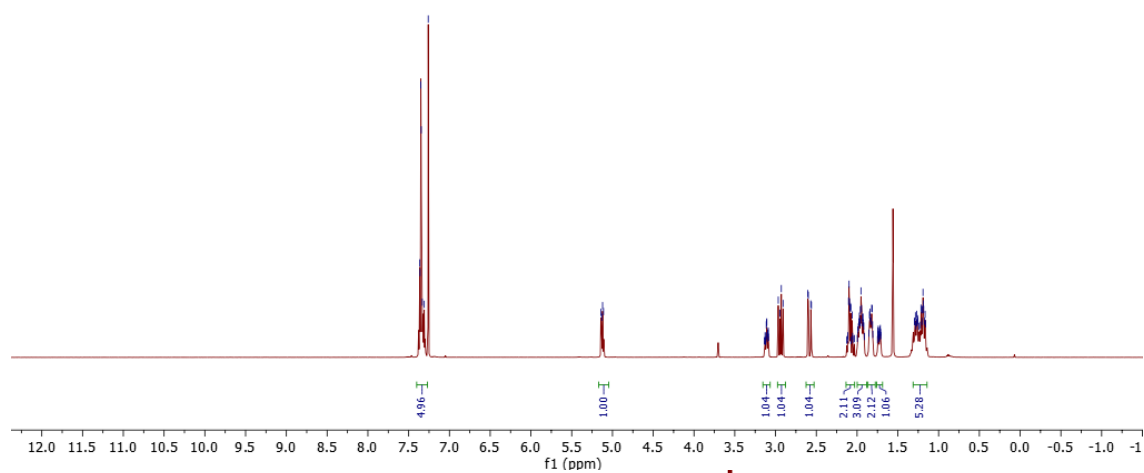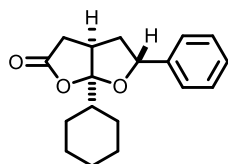

$^{13}\text{C}$  NMR (125 MHz,  $\text{CDCl}_3$ )

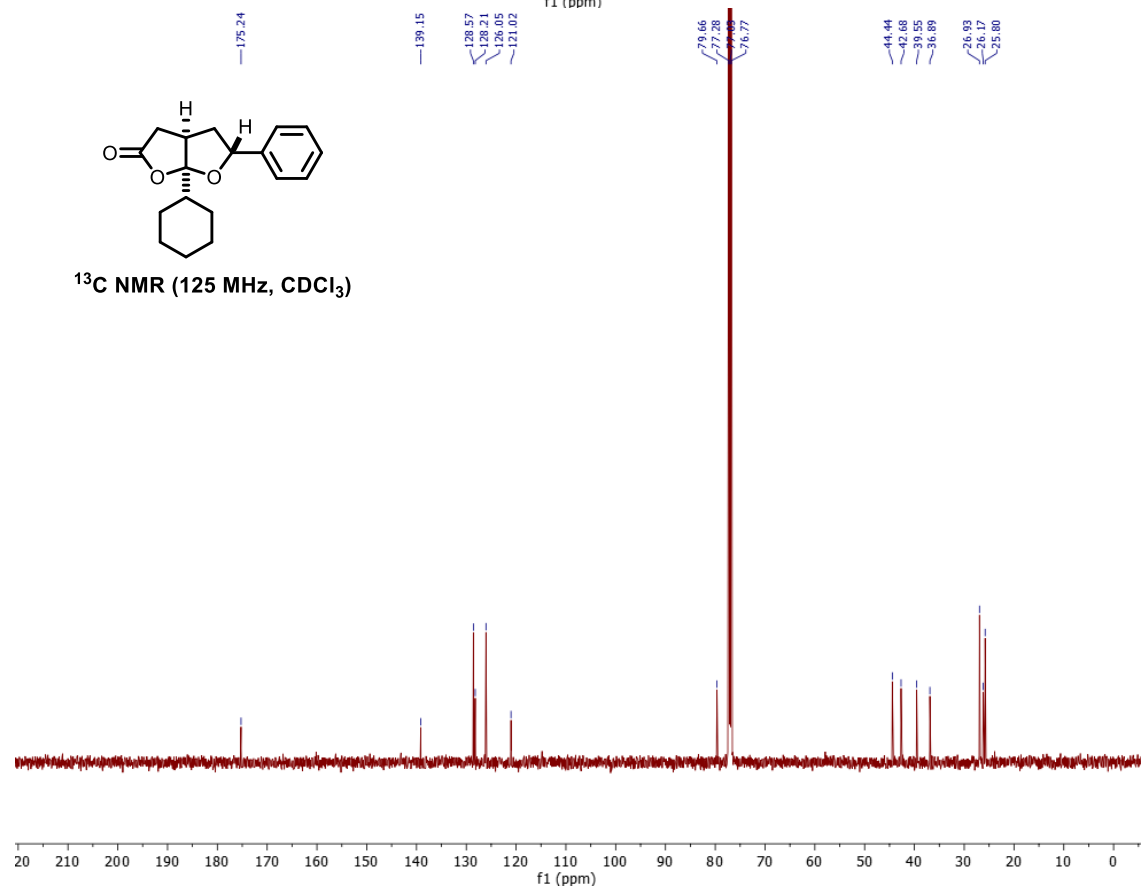

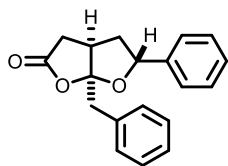

<sup>1</sup>H NMR (500 MHz, CDCl<sub>3</sub>)

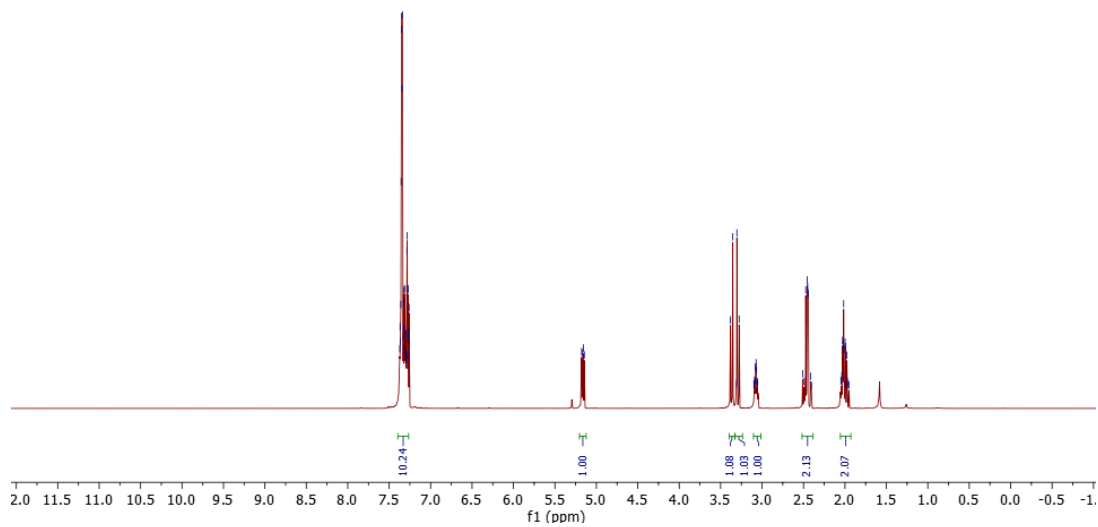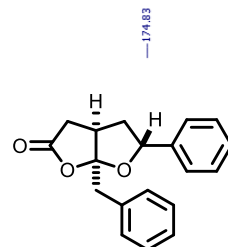

<sup>13</sup>C NMR (125 MHz, CDCl<sub>3</sub>)

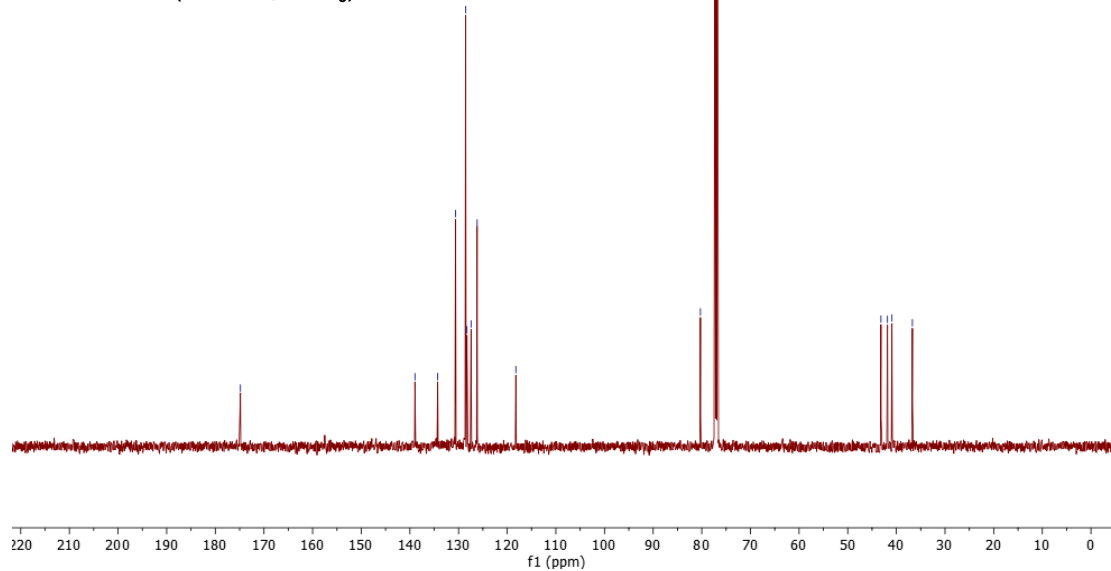

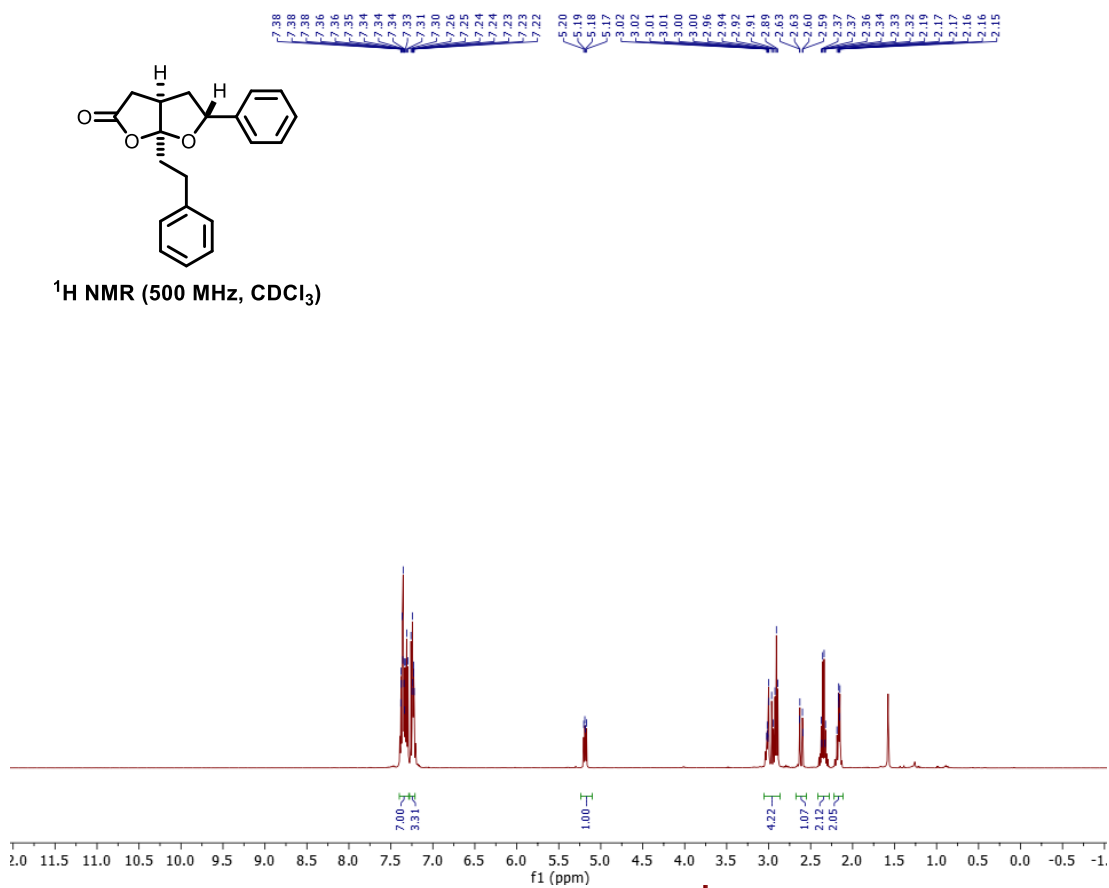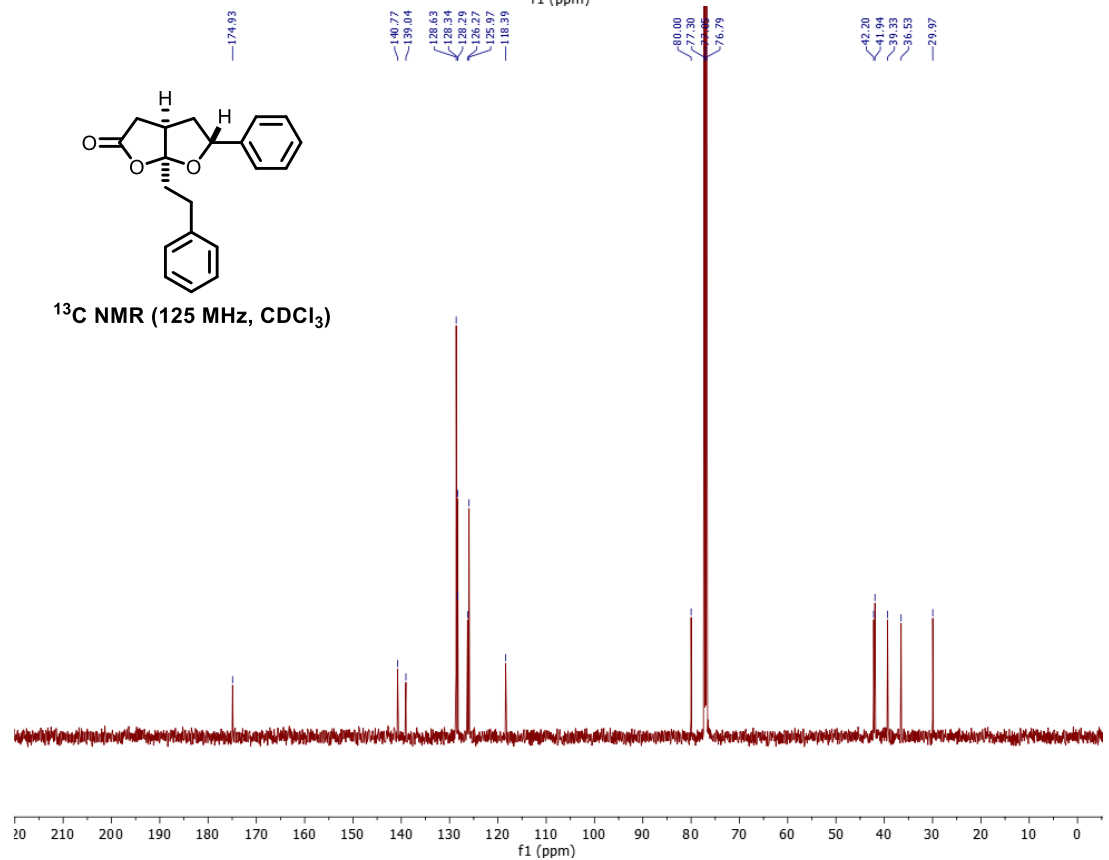

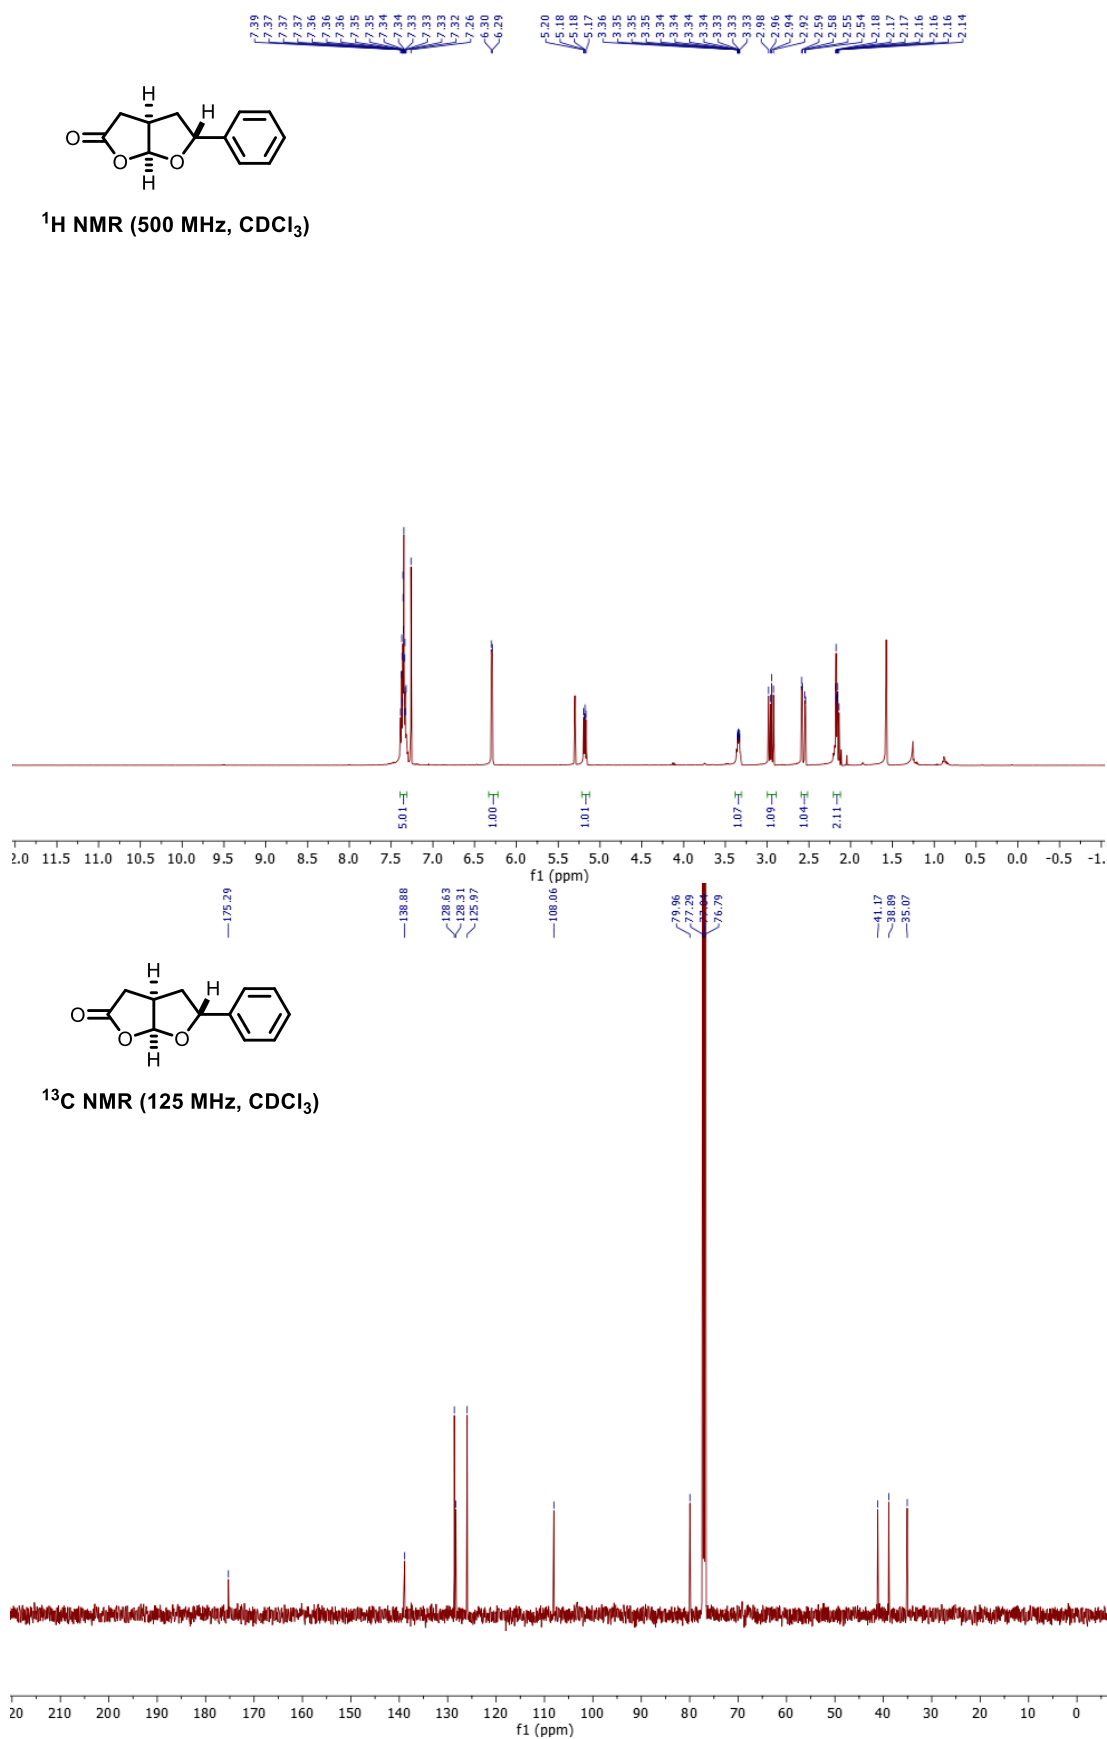

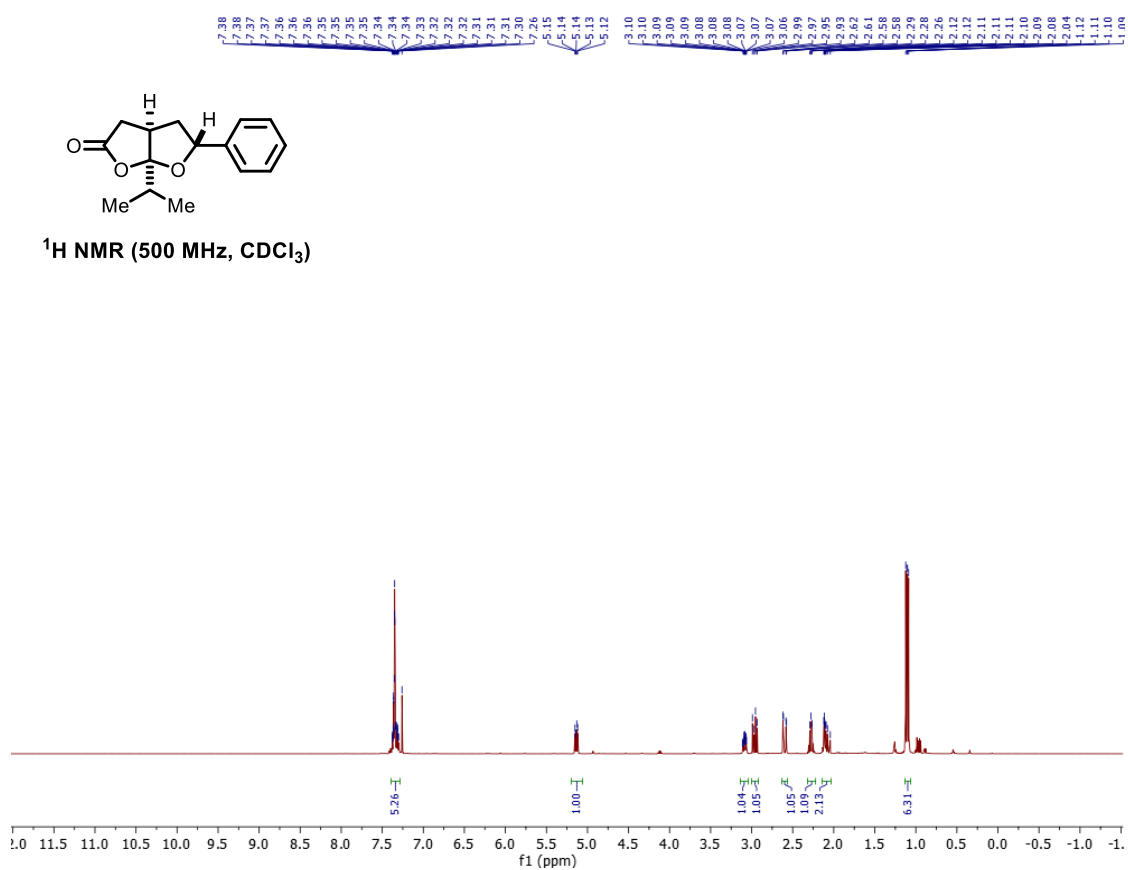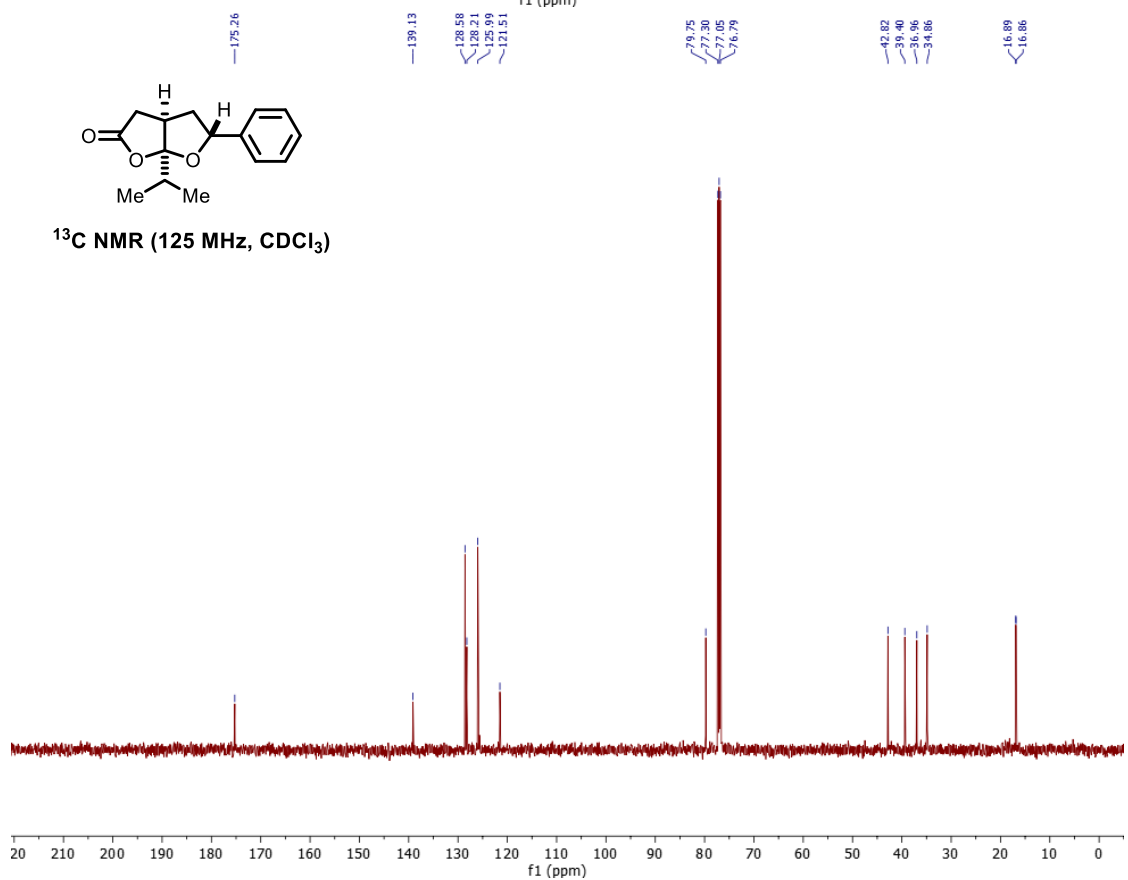

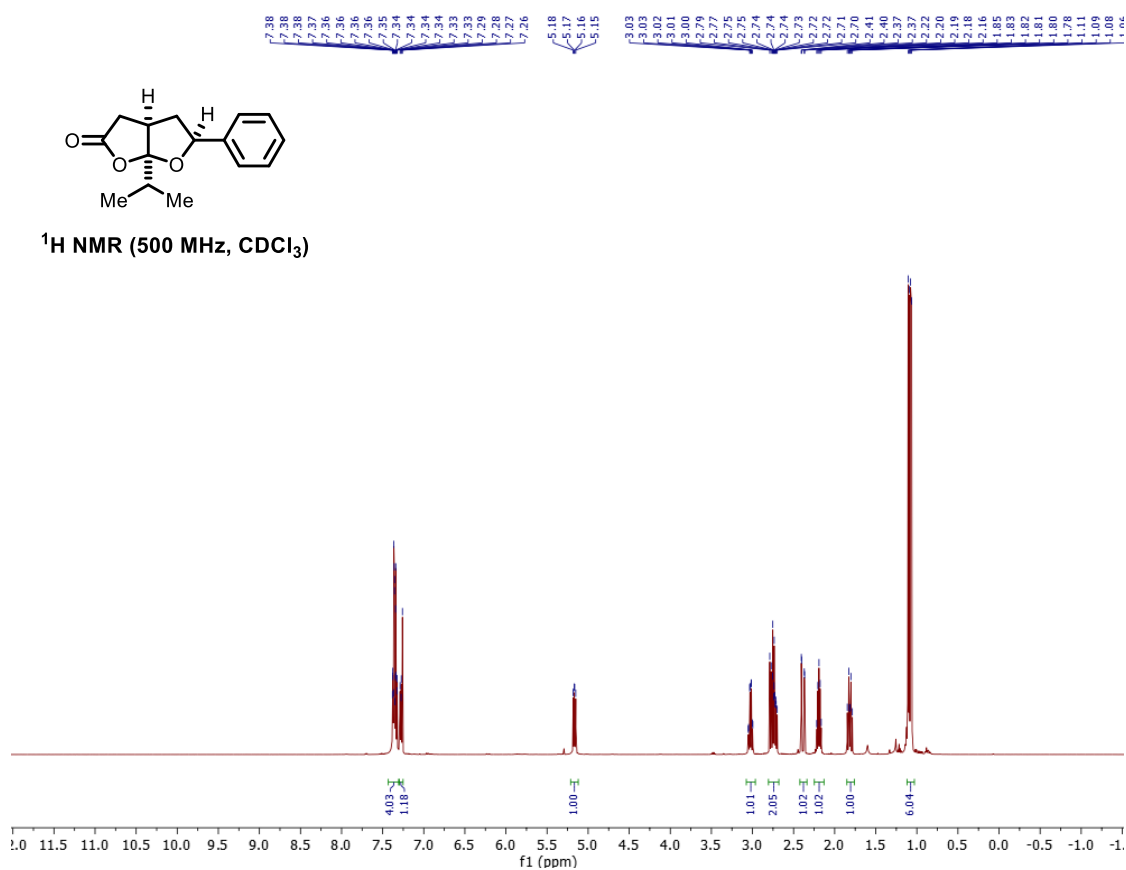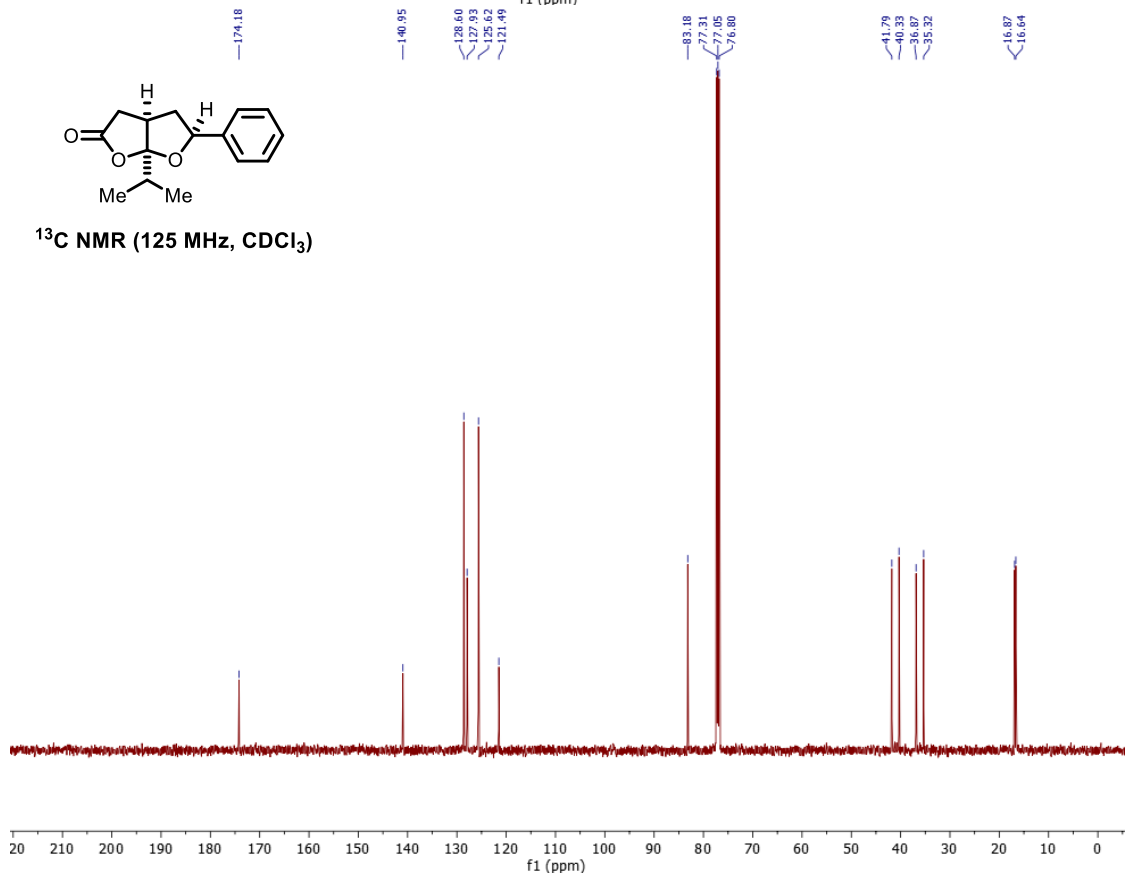



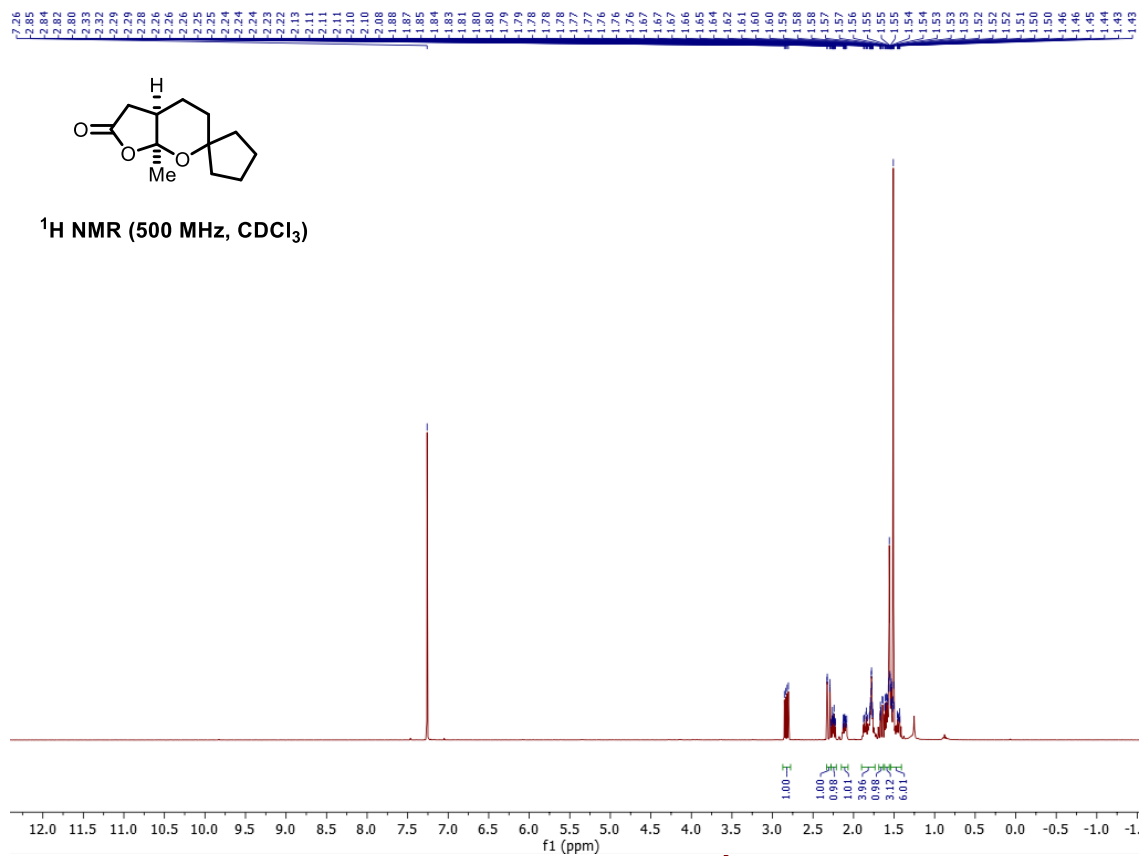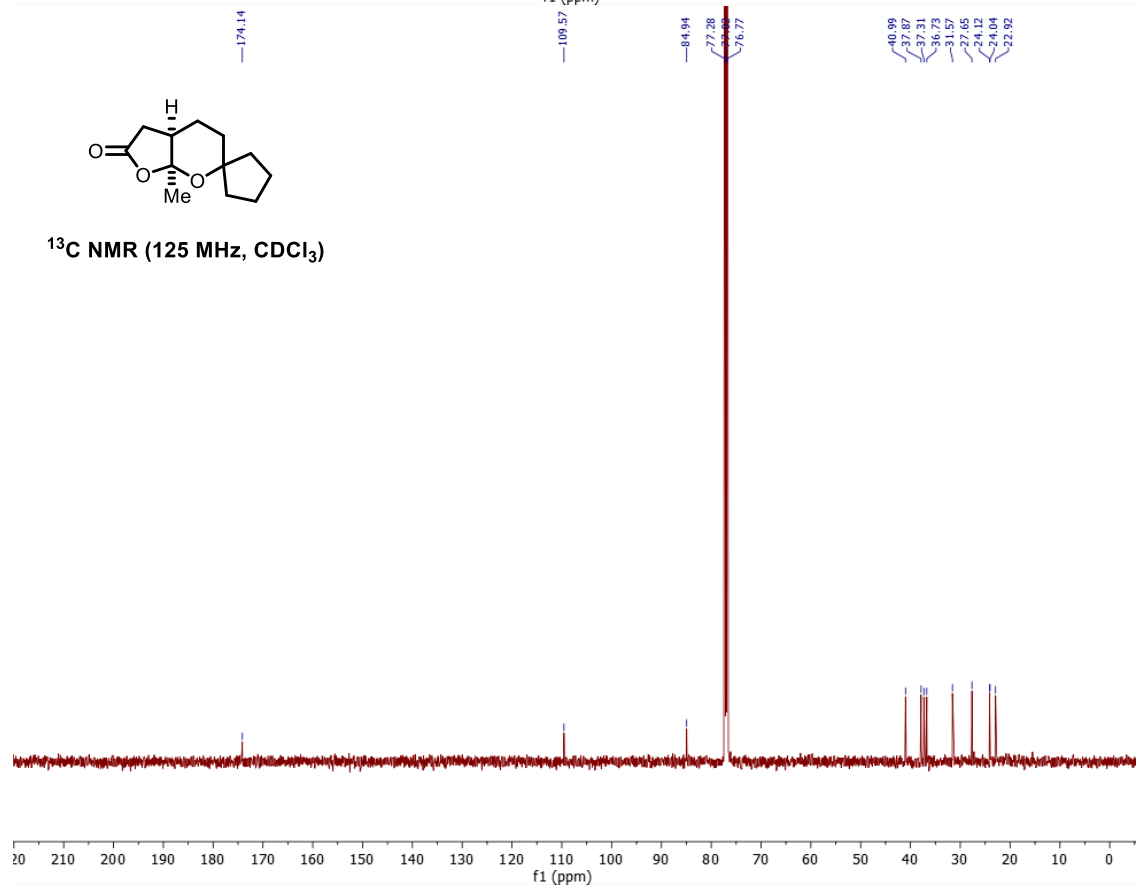

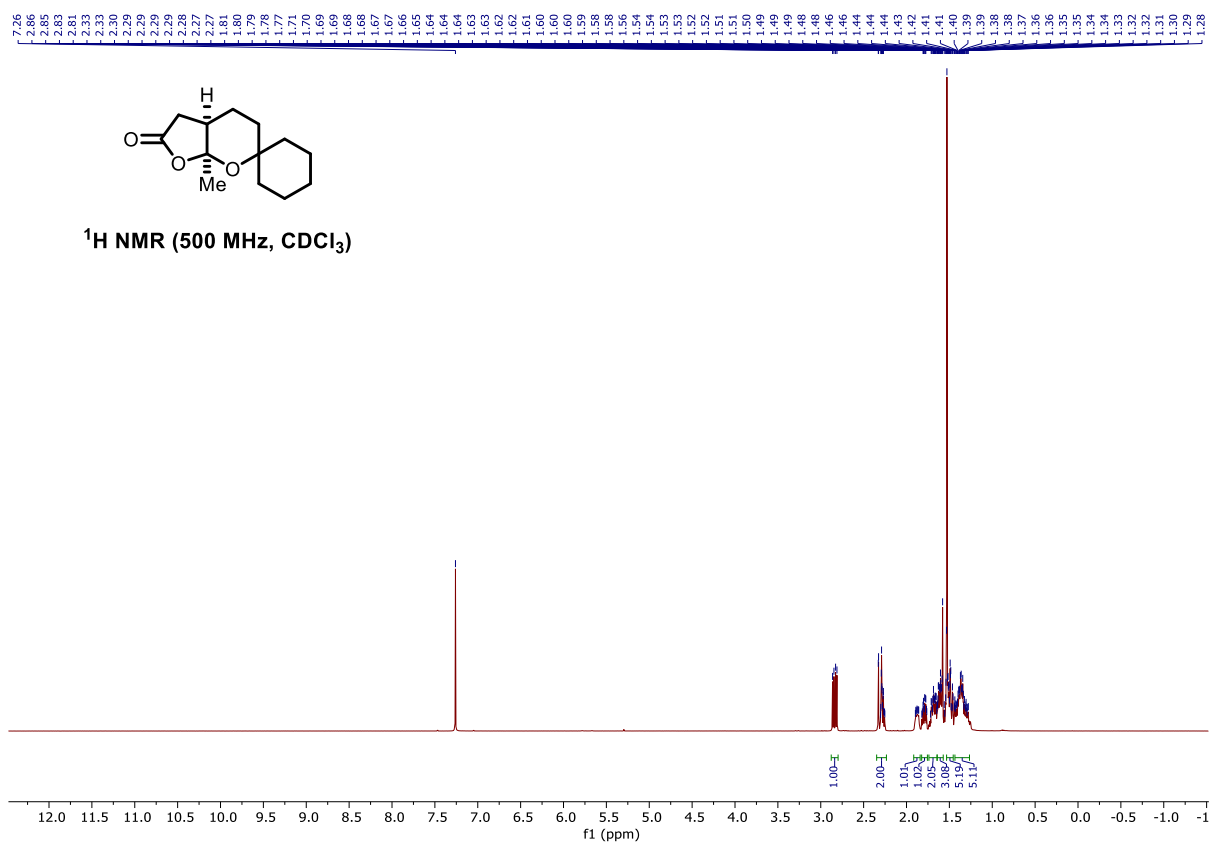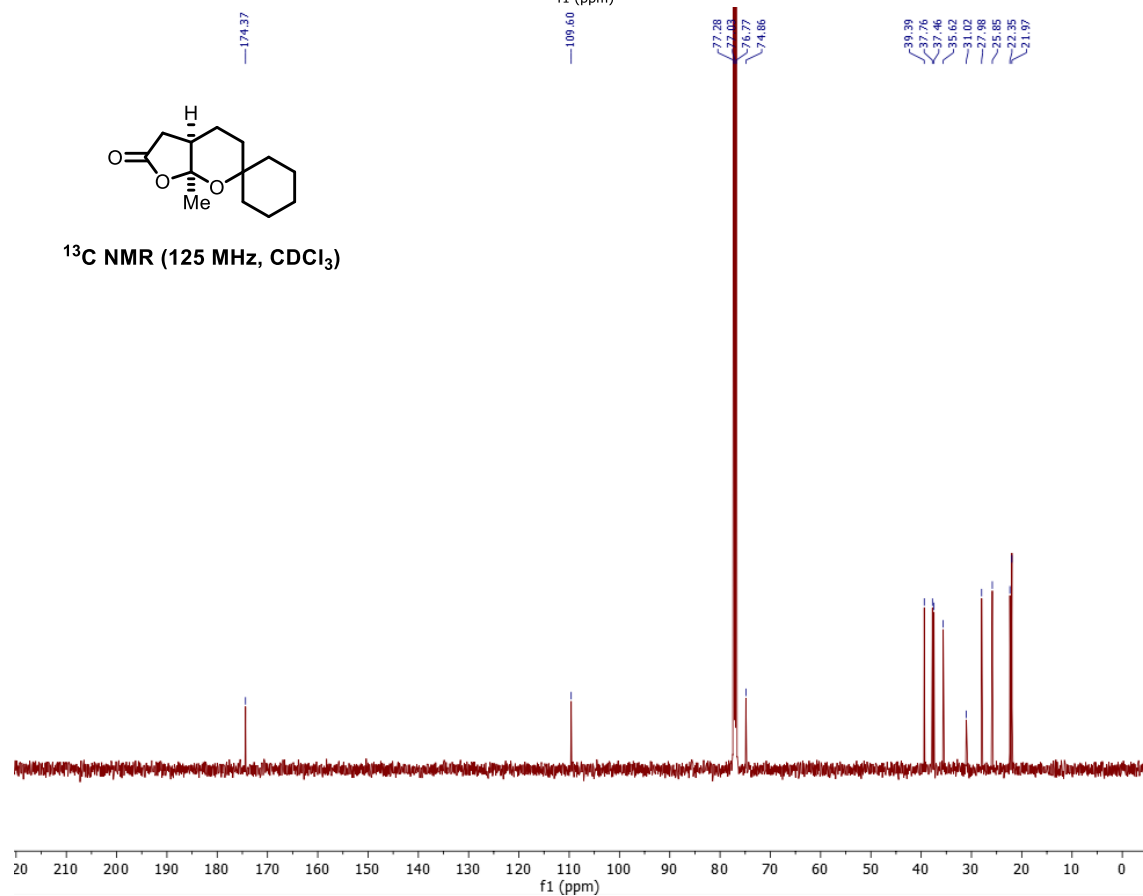

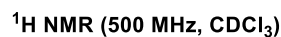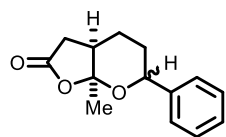 $^{13}\text{C}$  NMR (125 MHz,  $\text{CDCl}_3$ )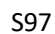

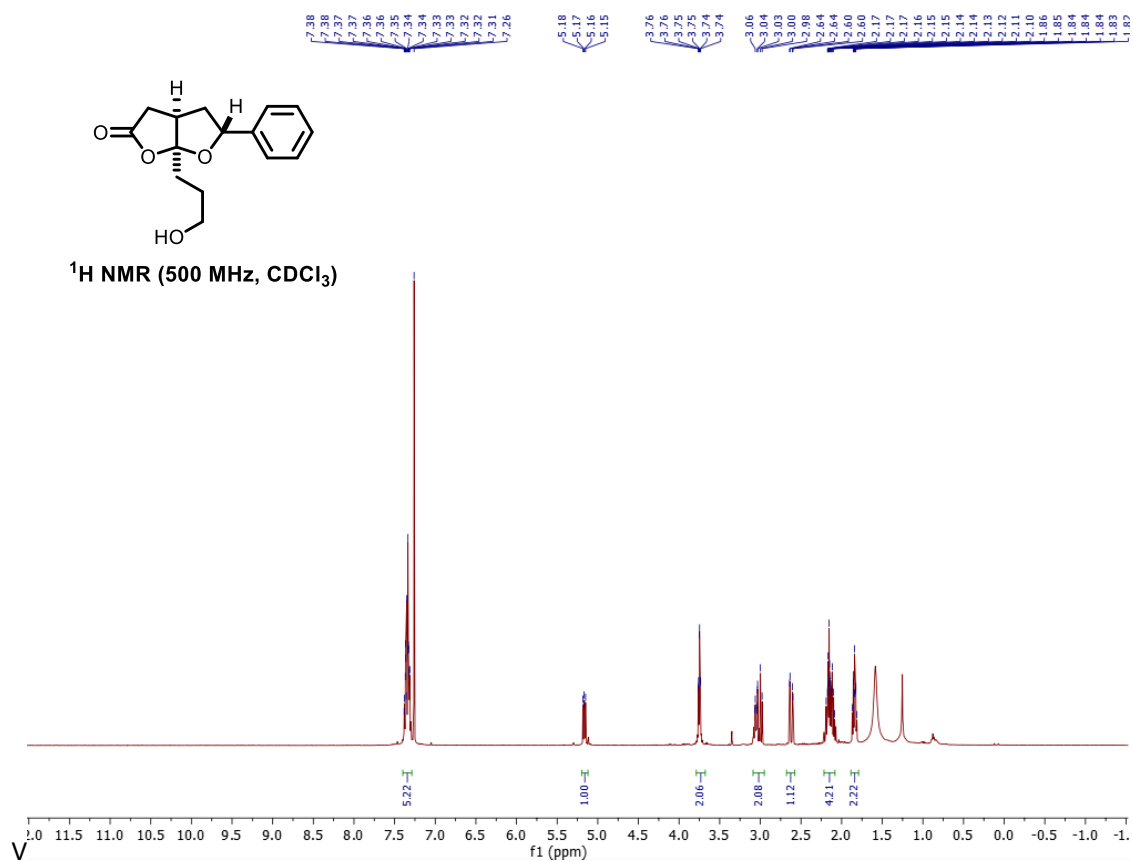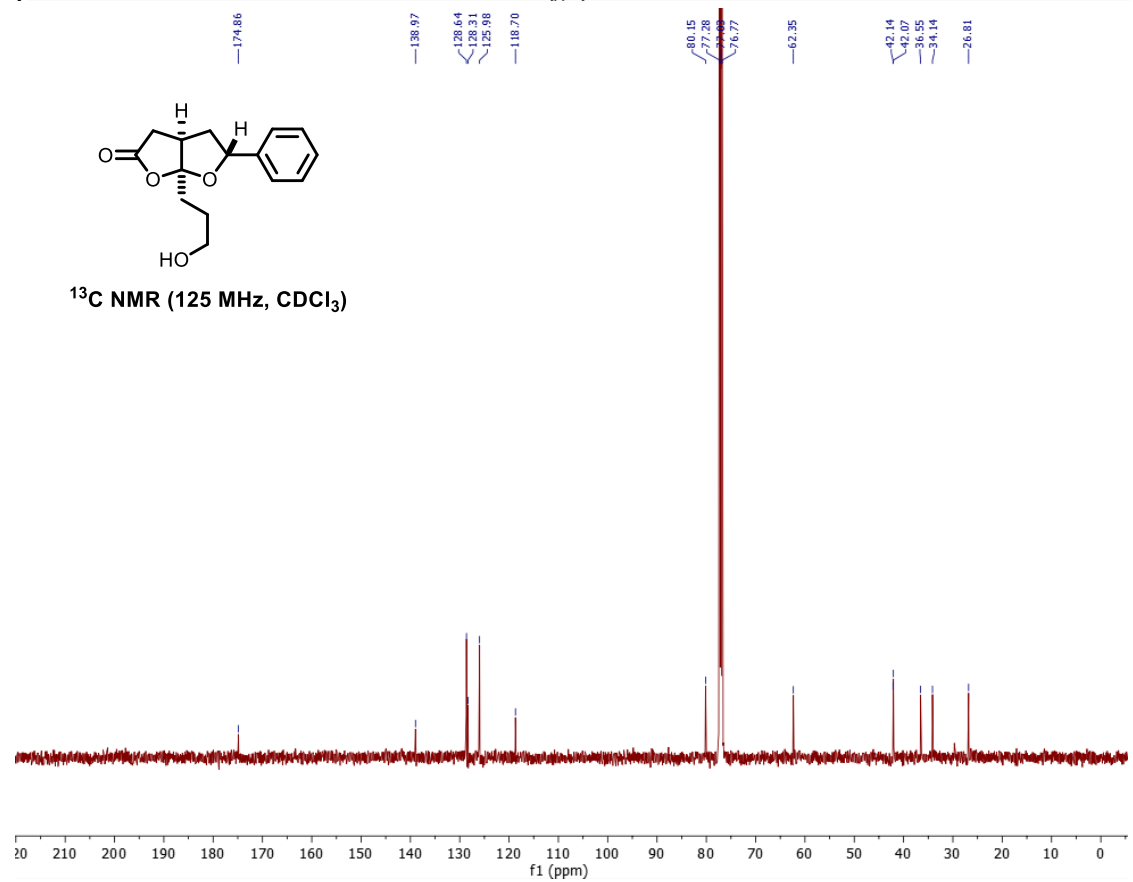

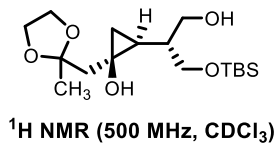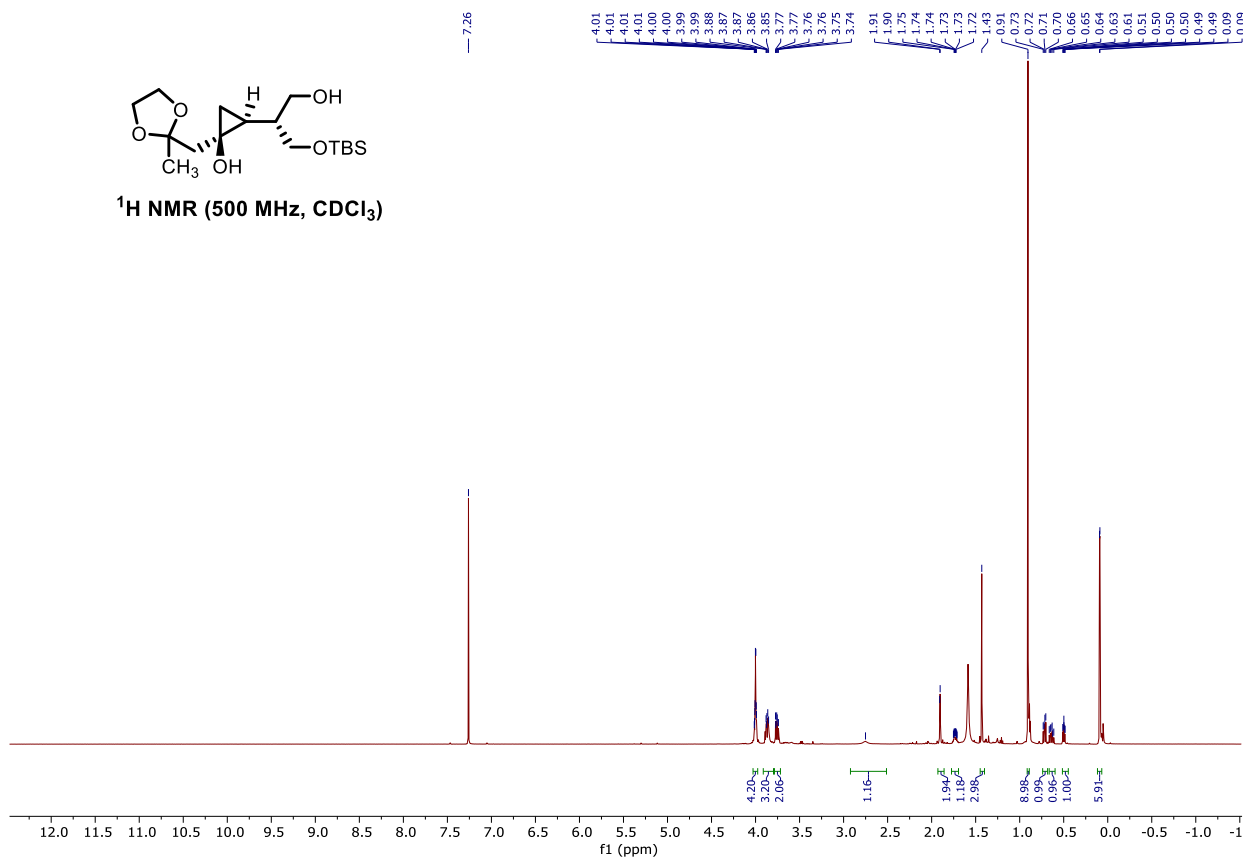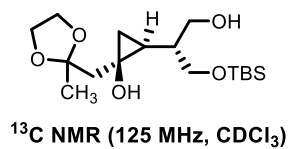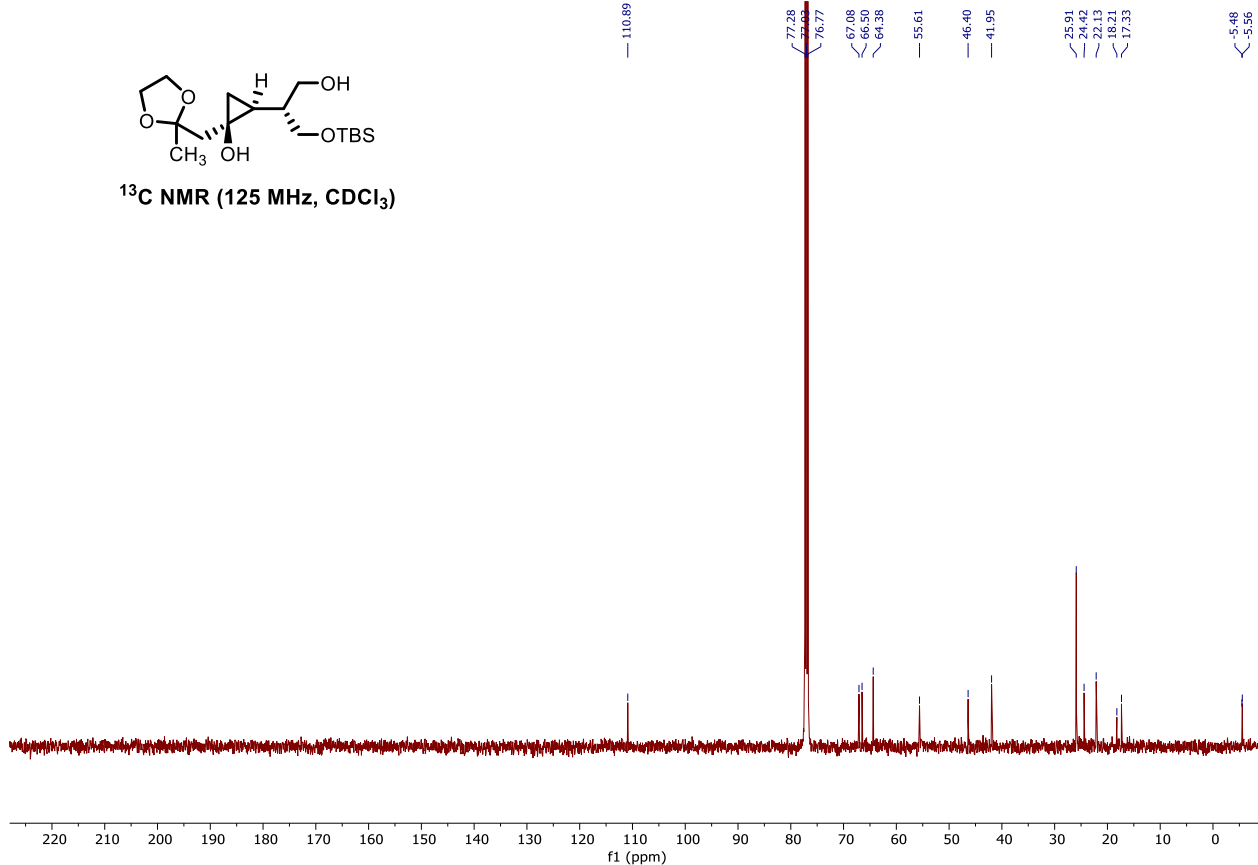

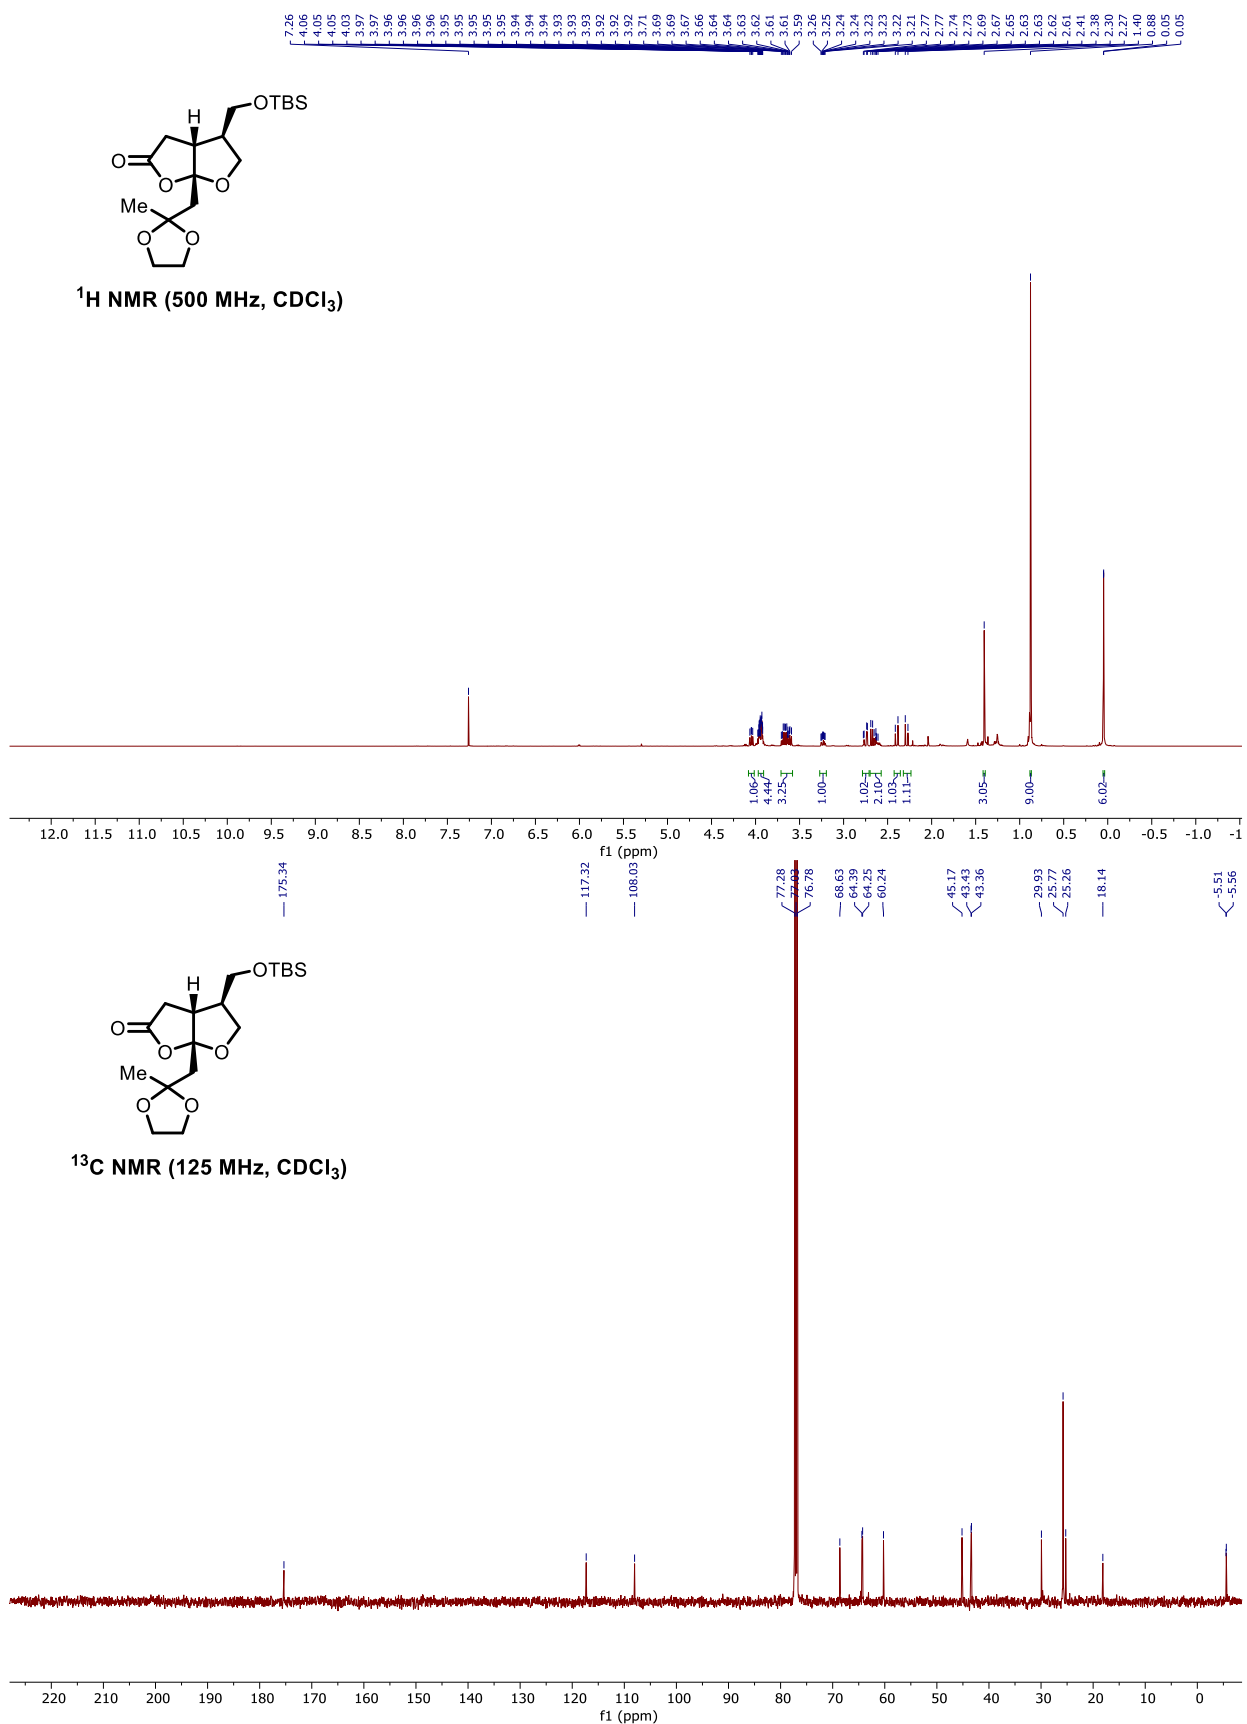

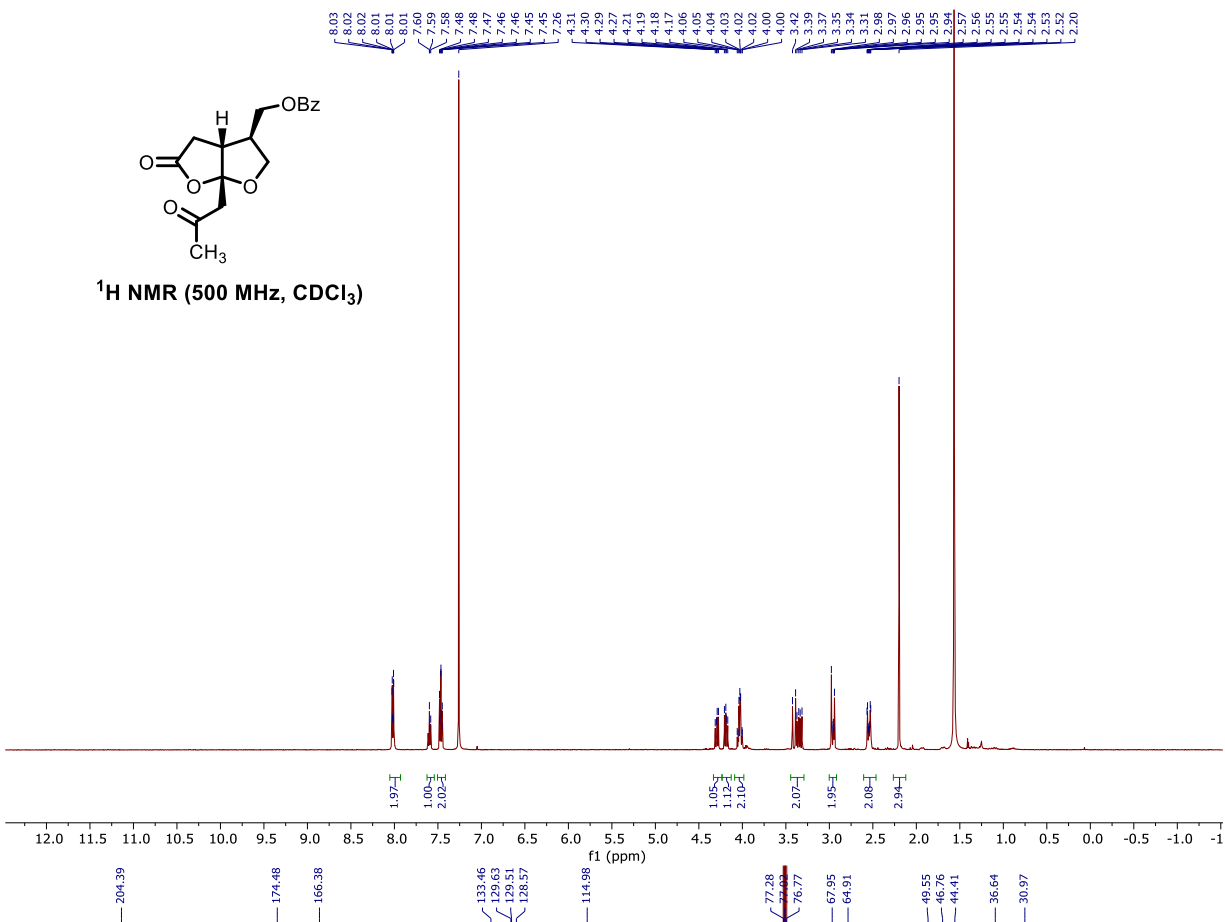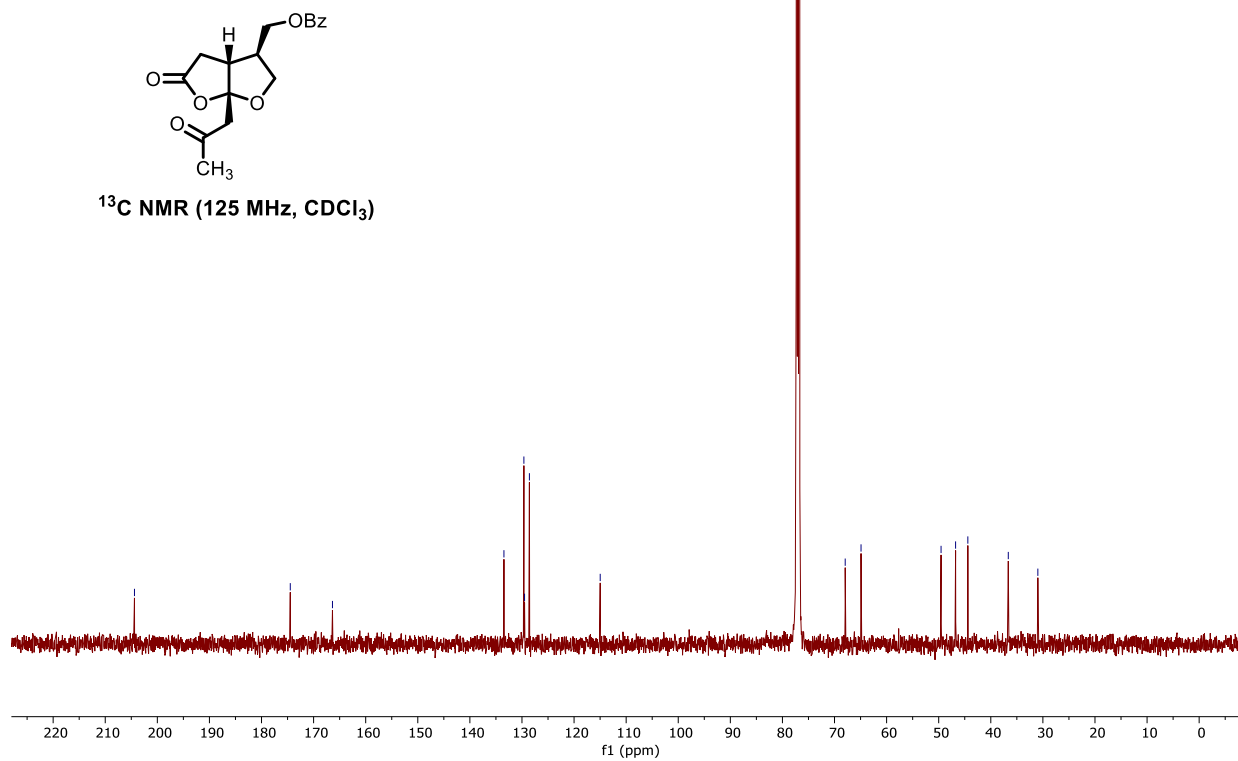

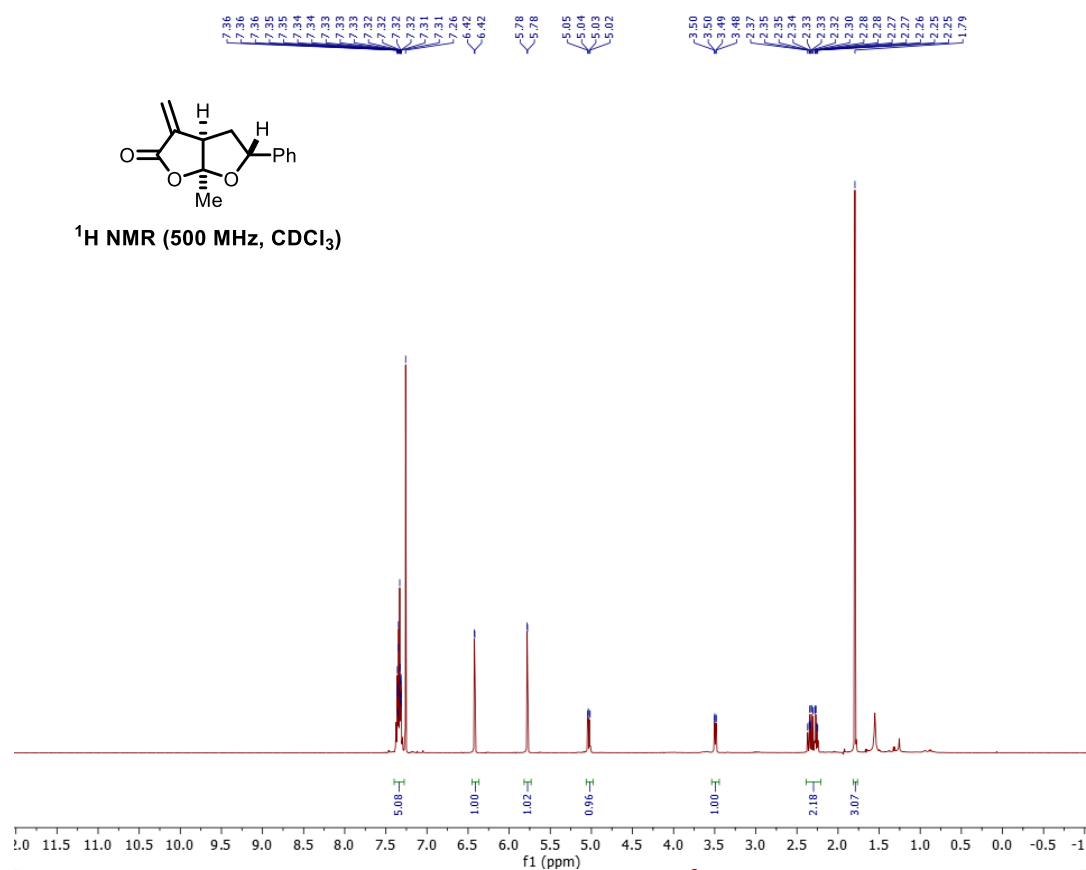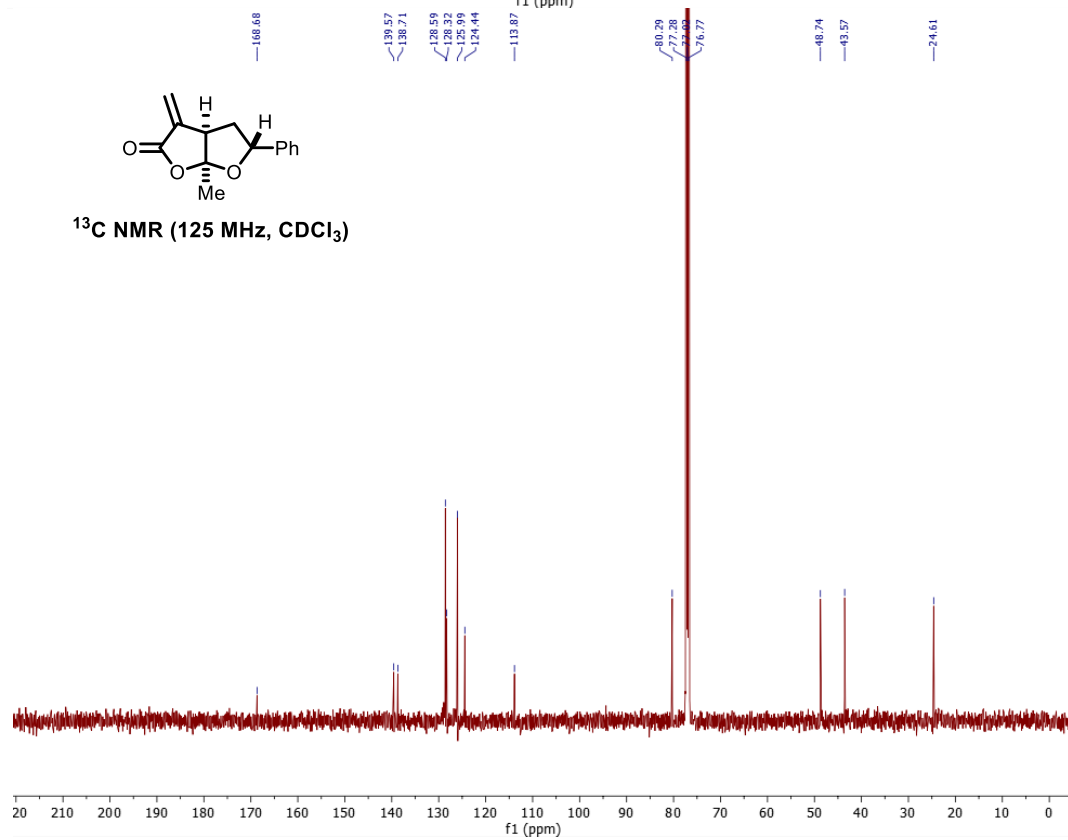

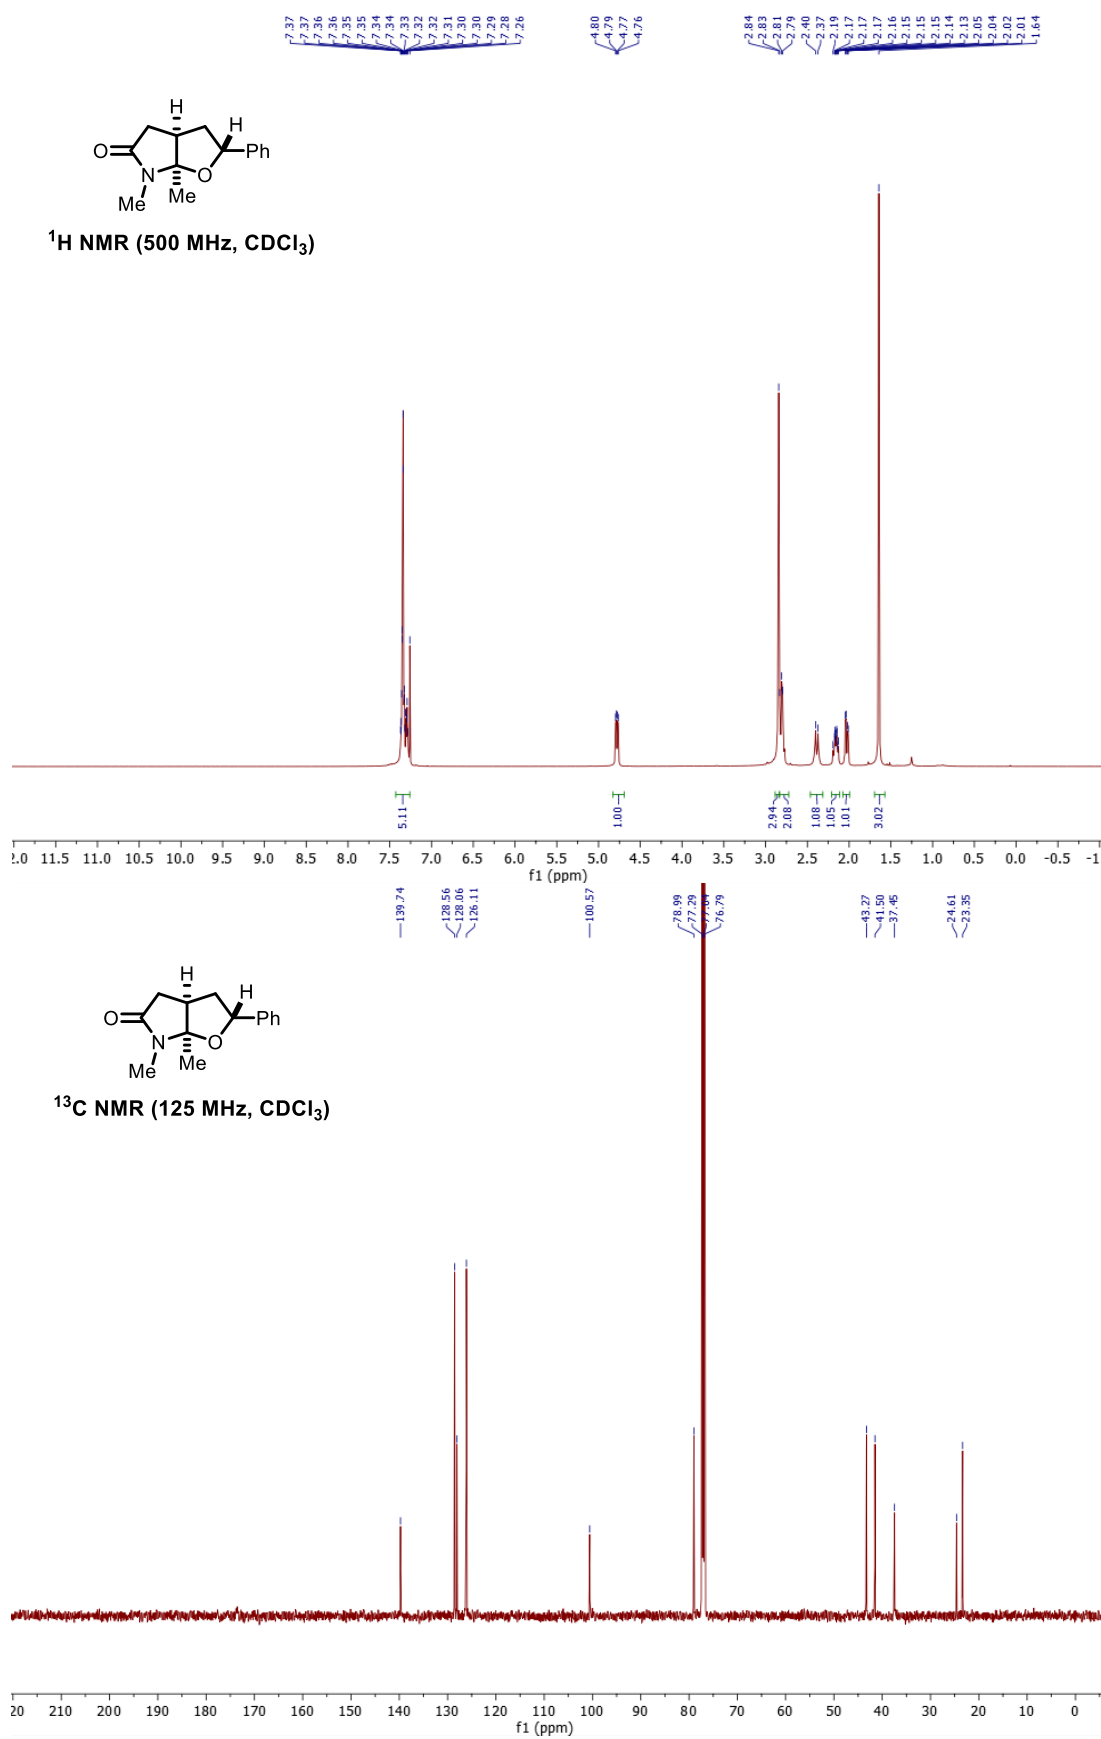

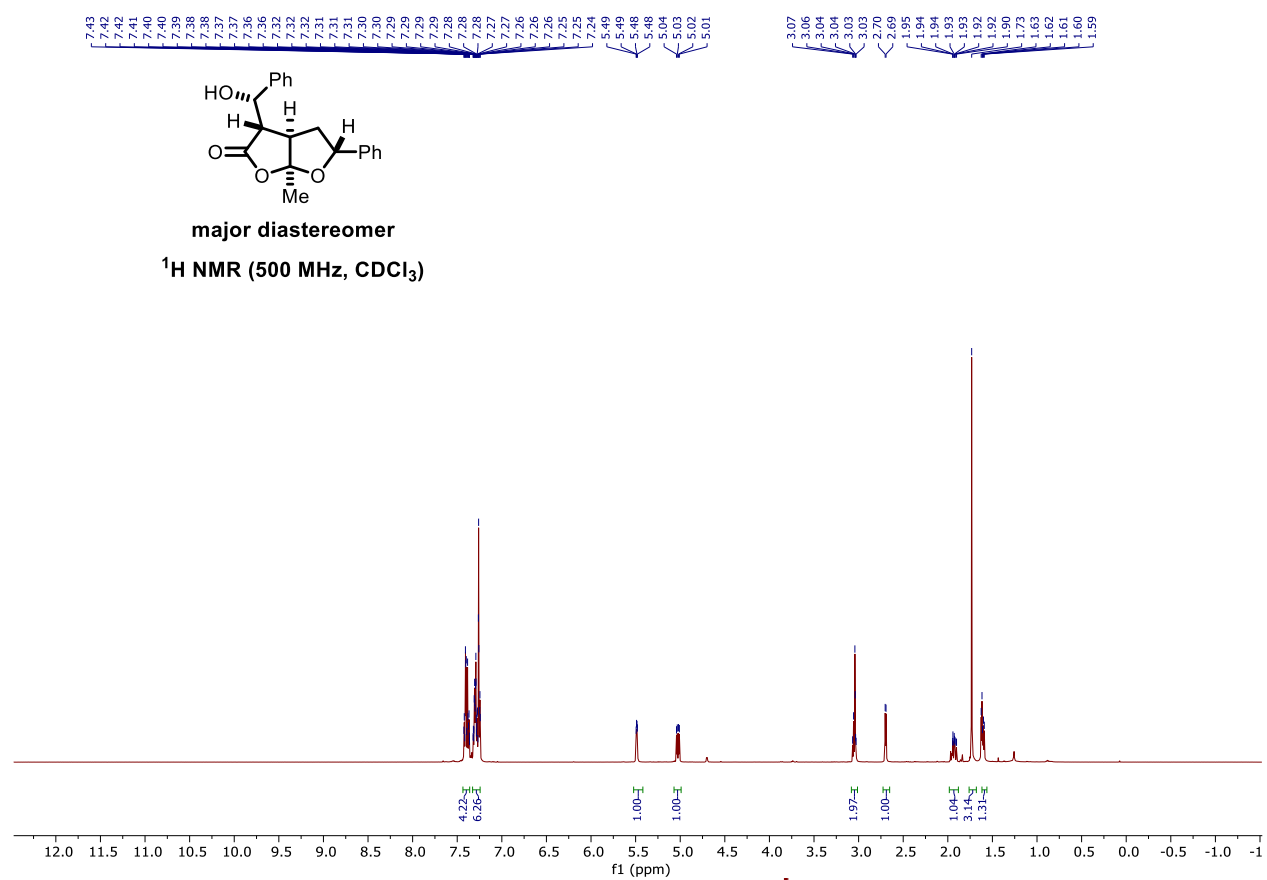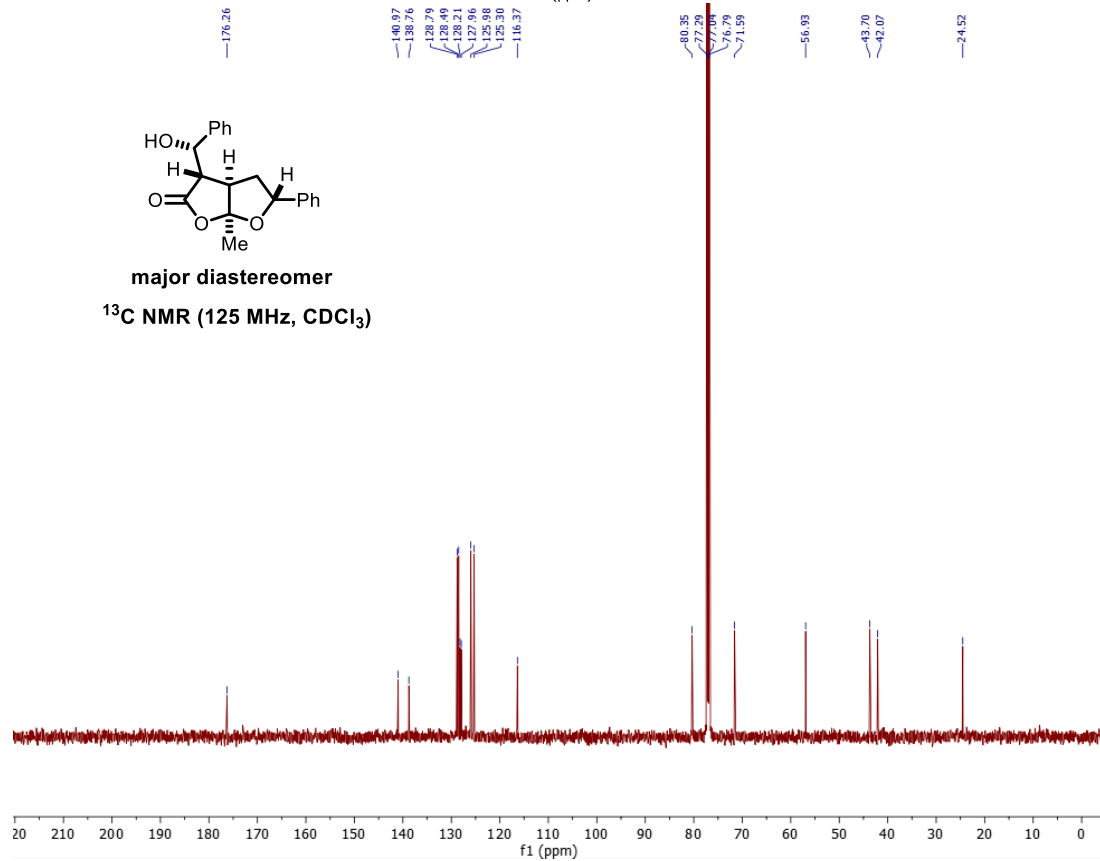

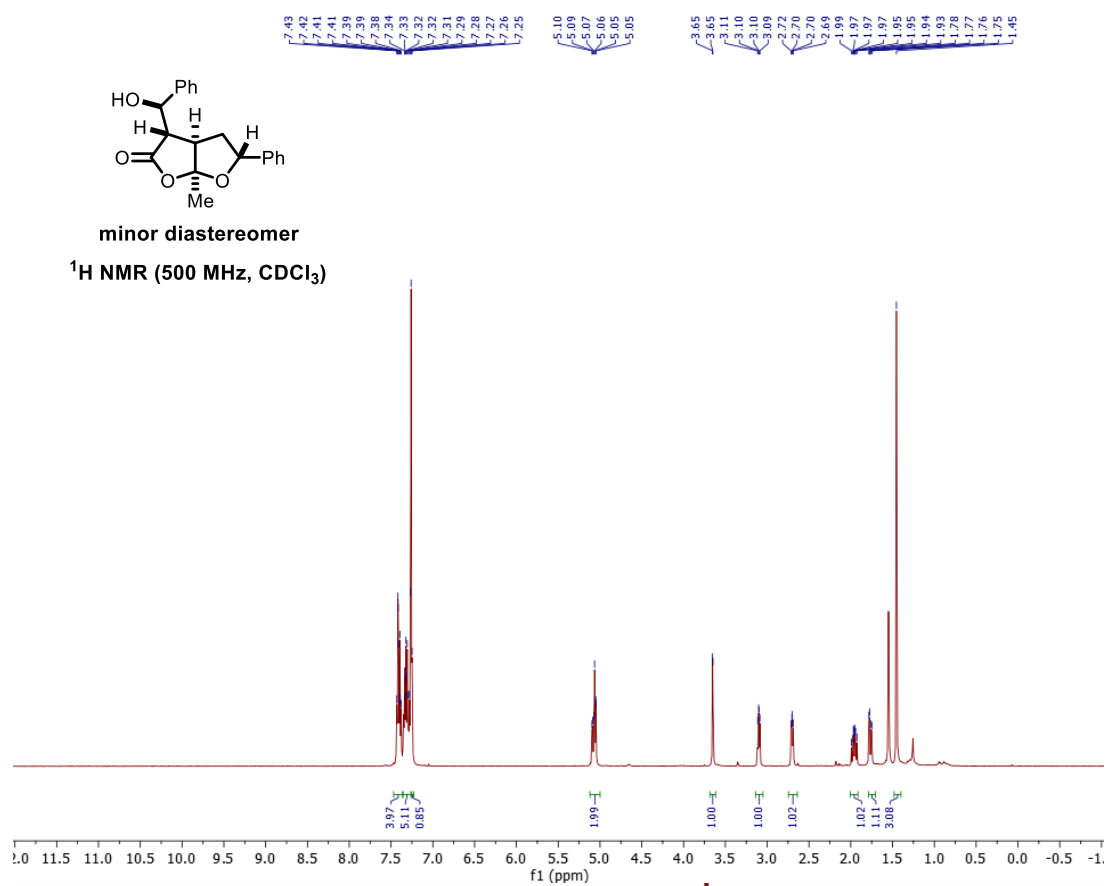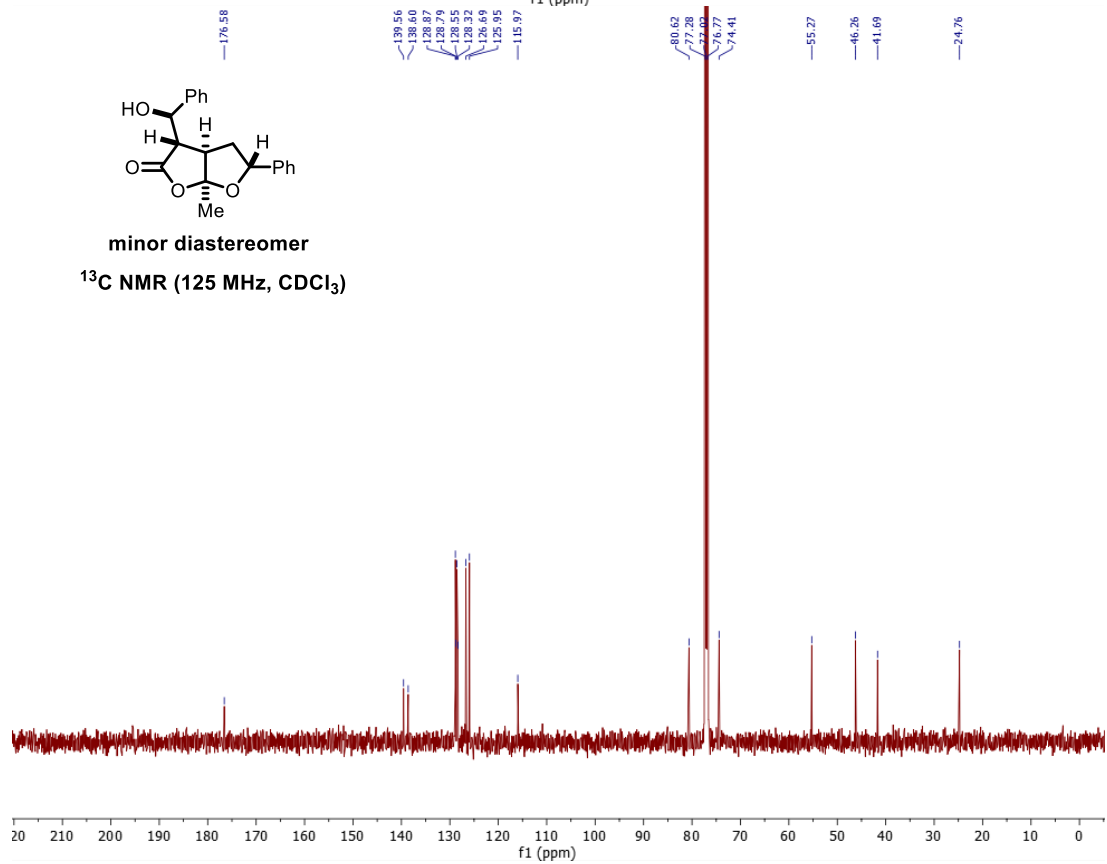

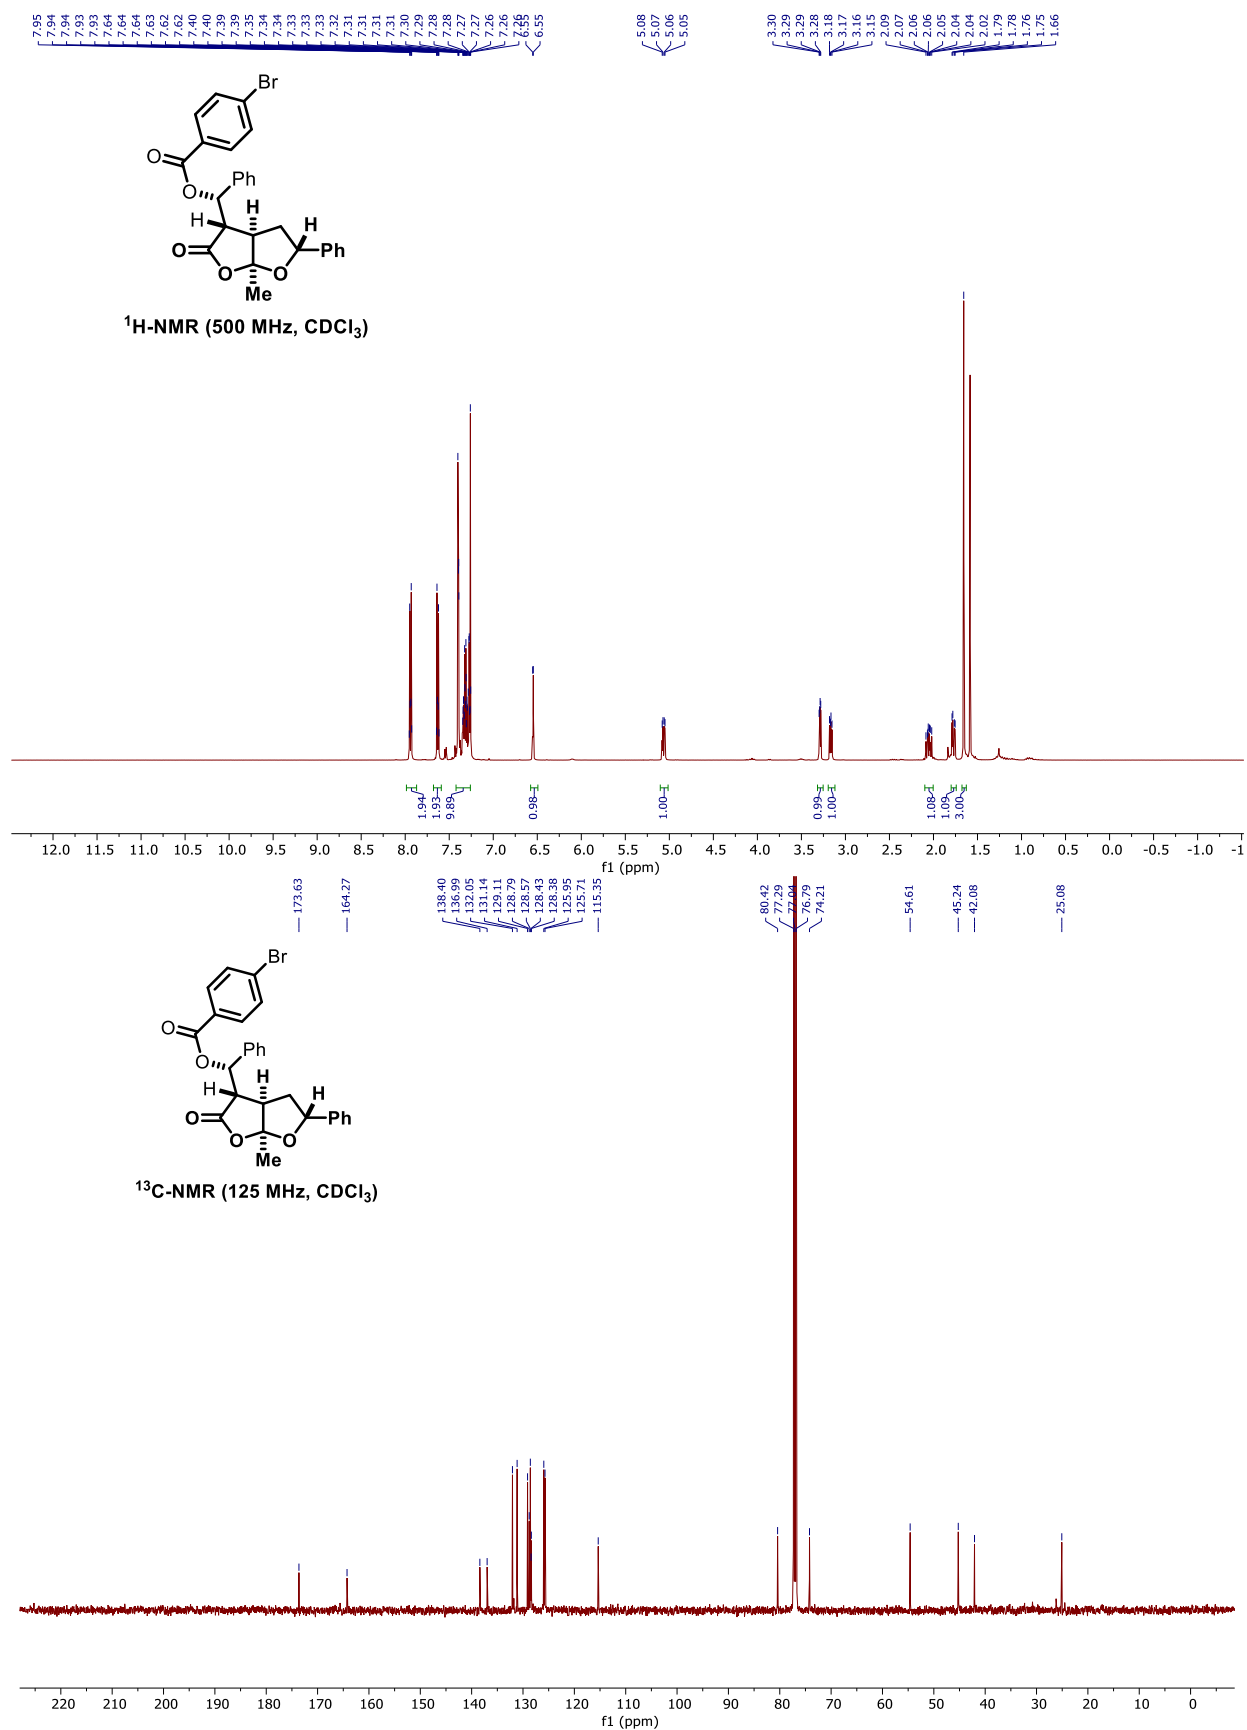

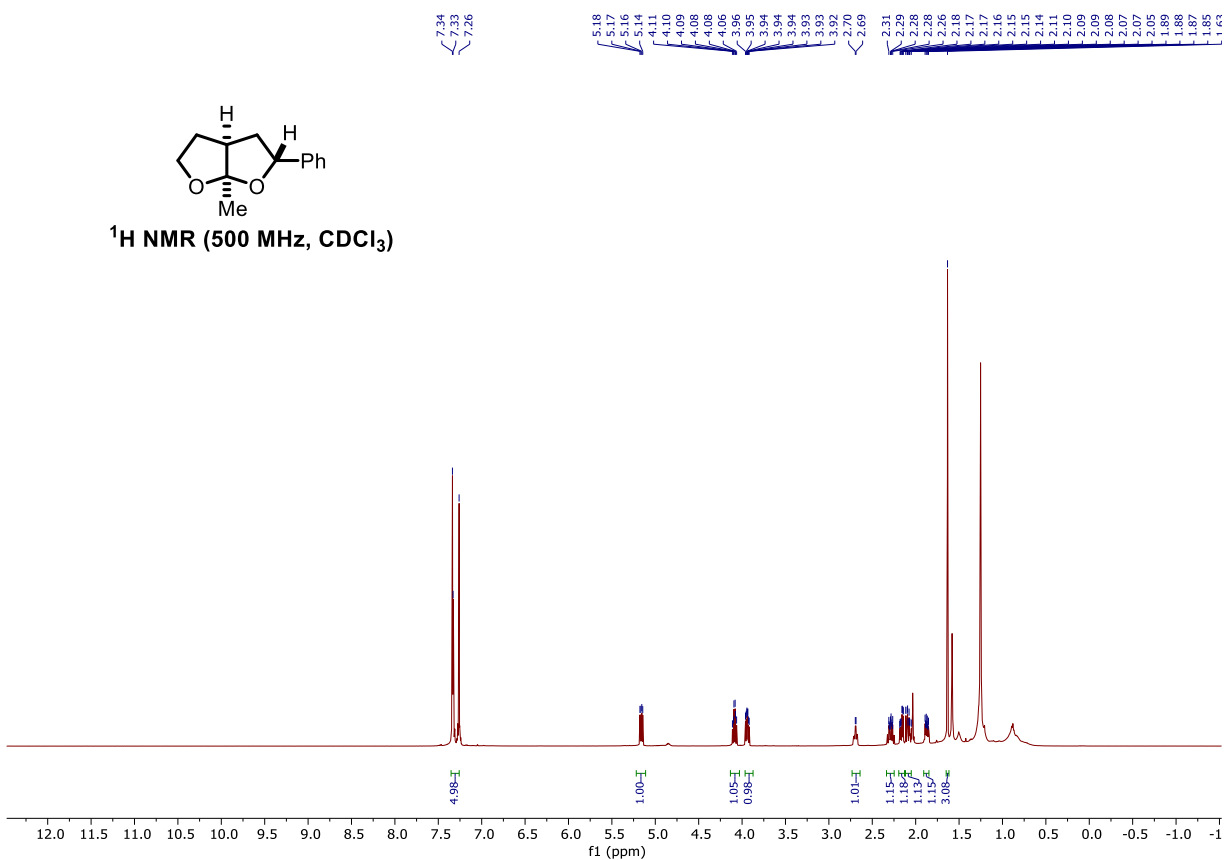

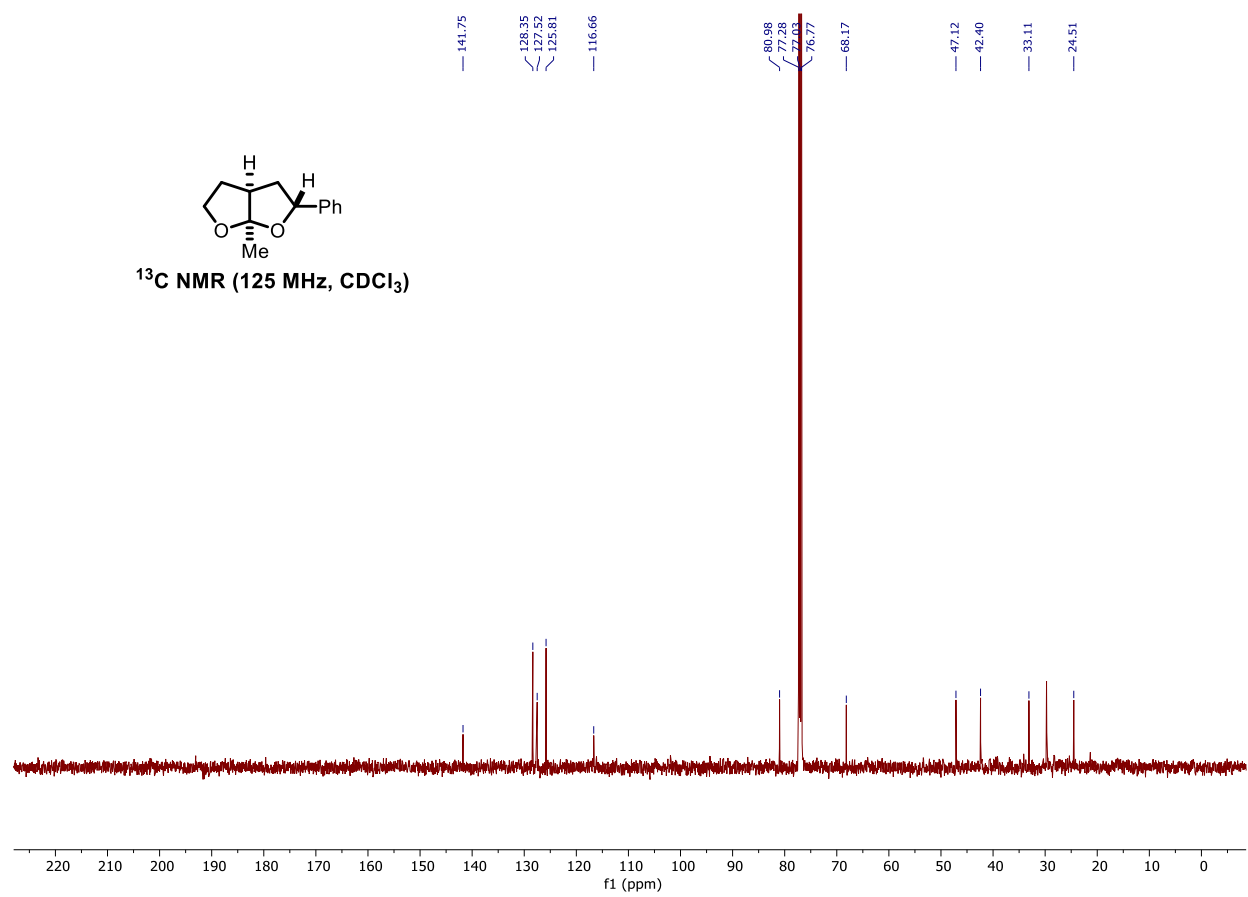

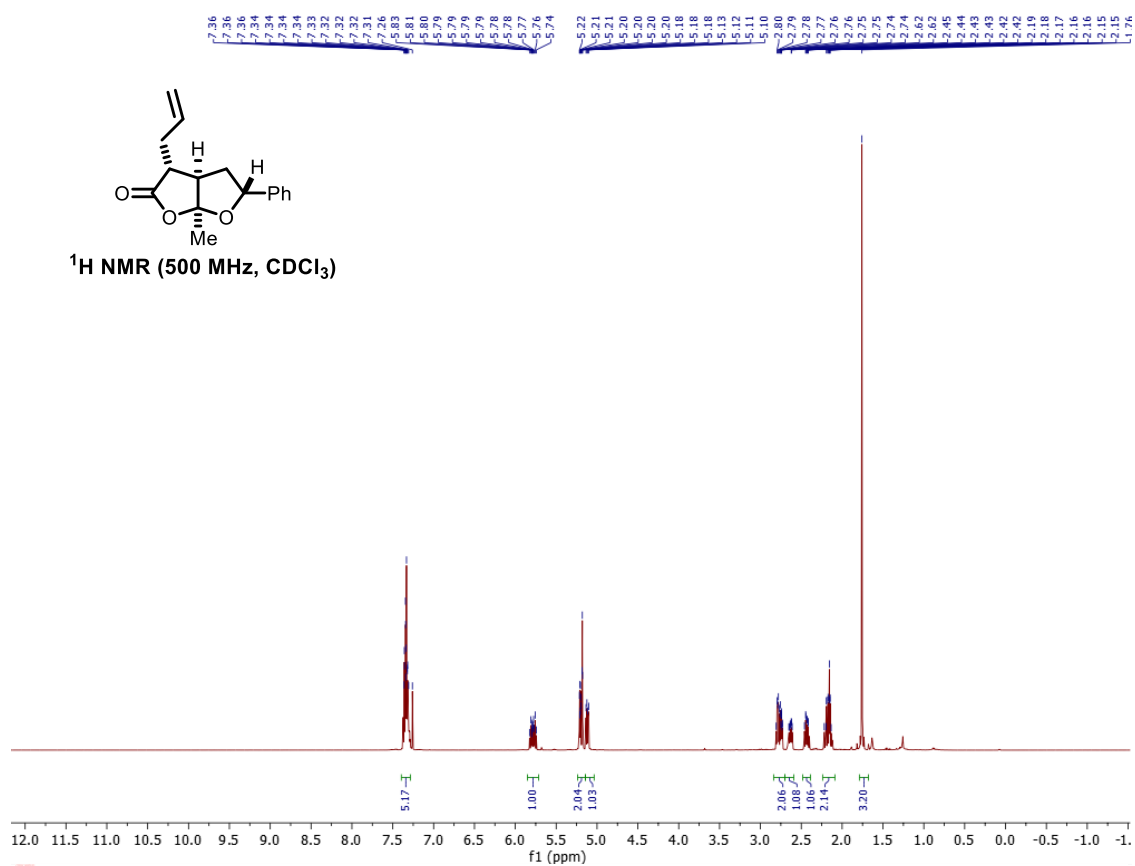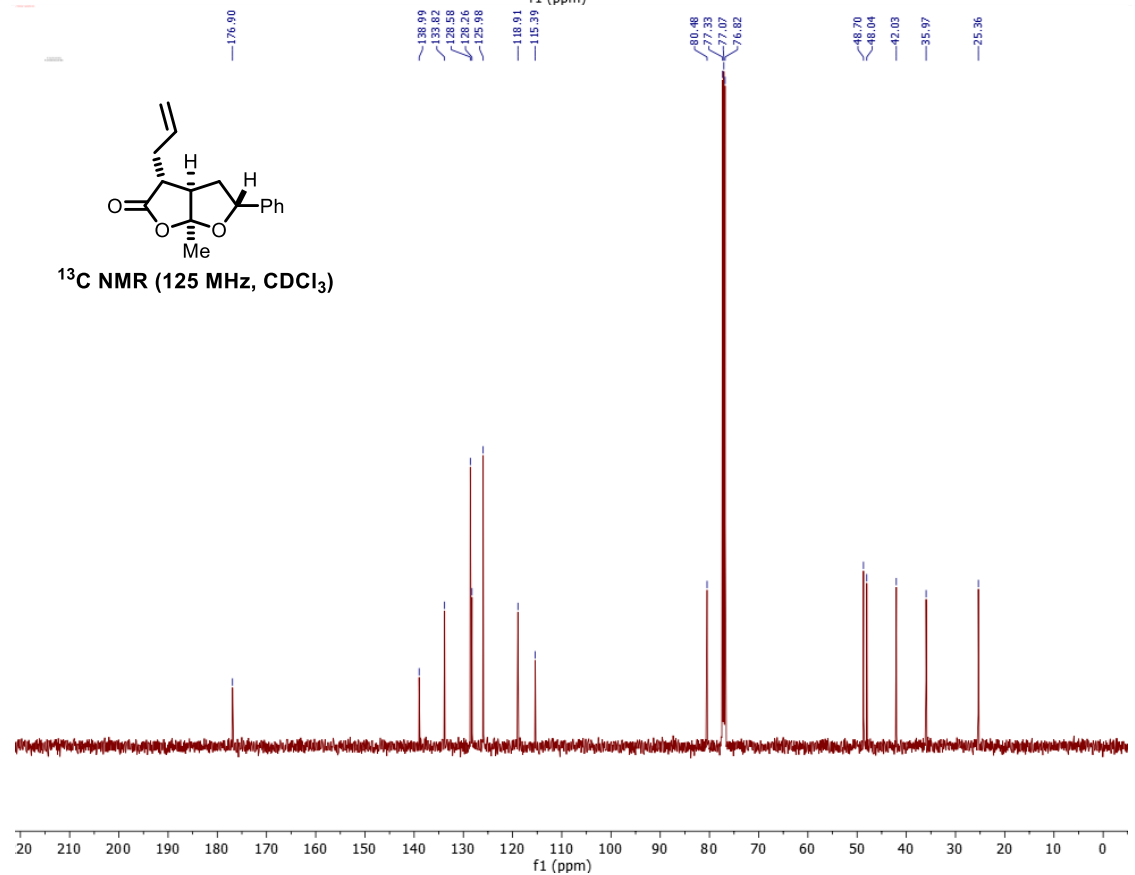

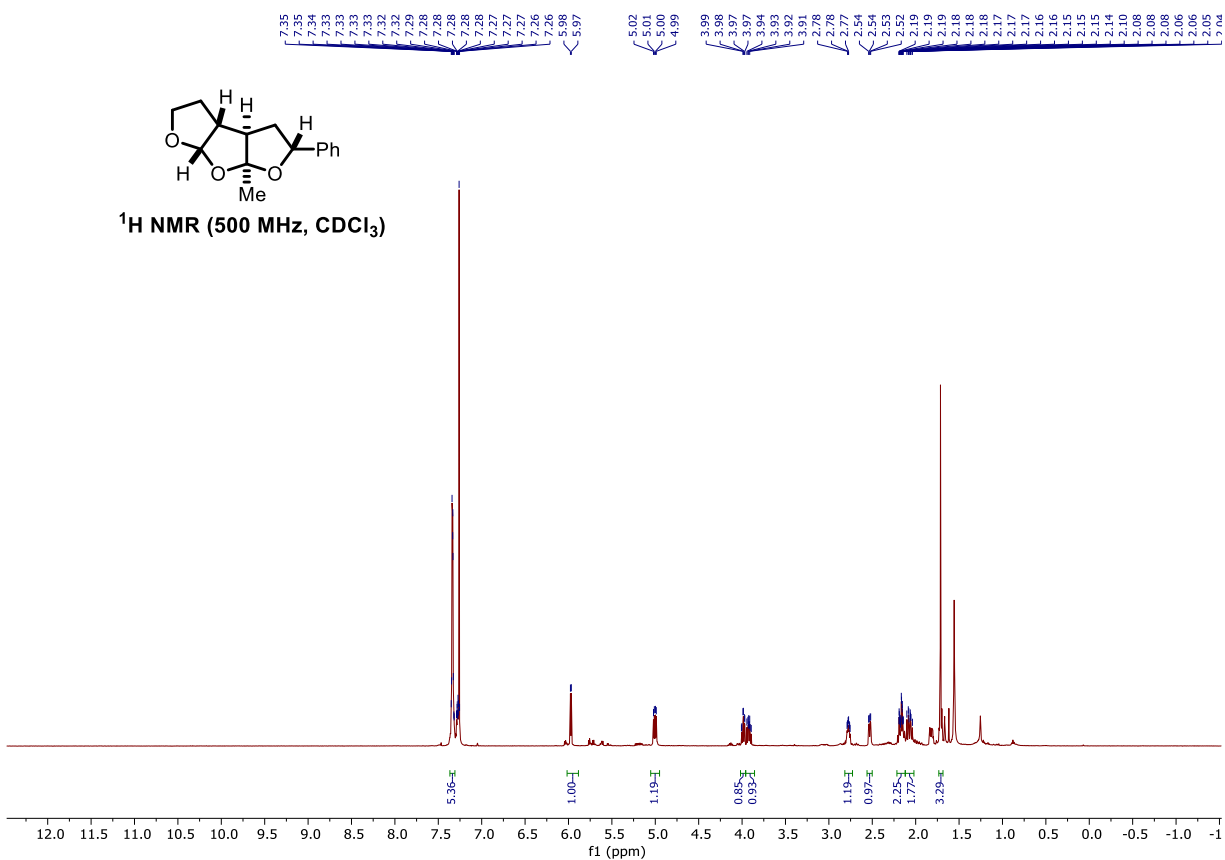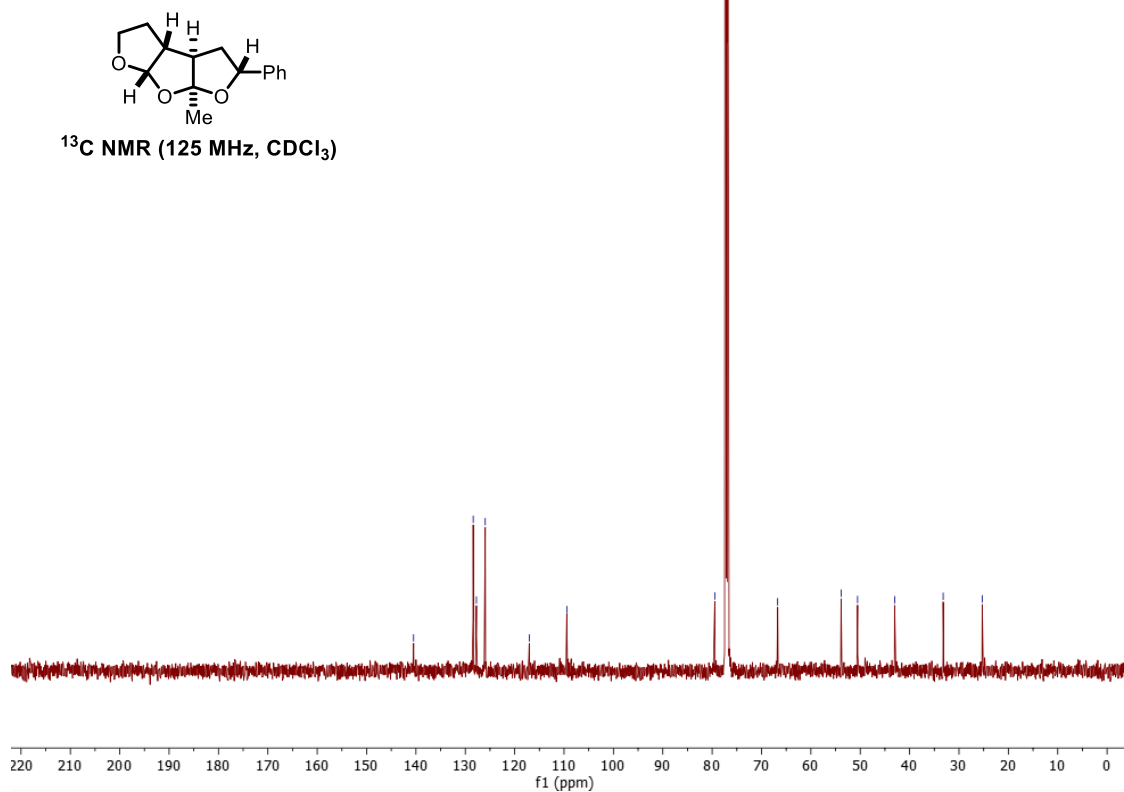

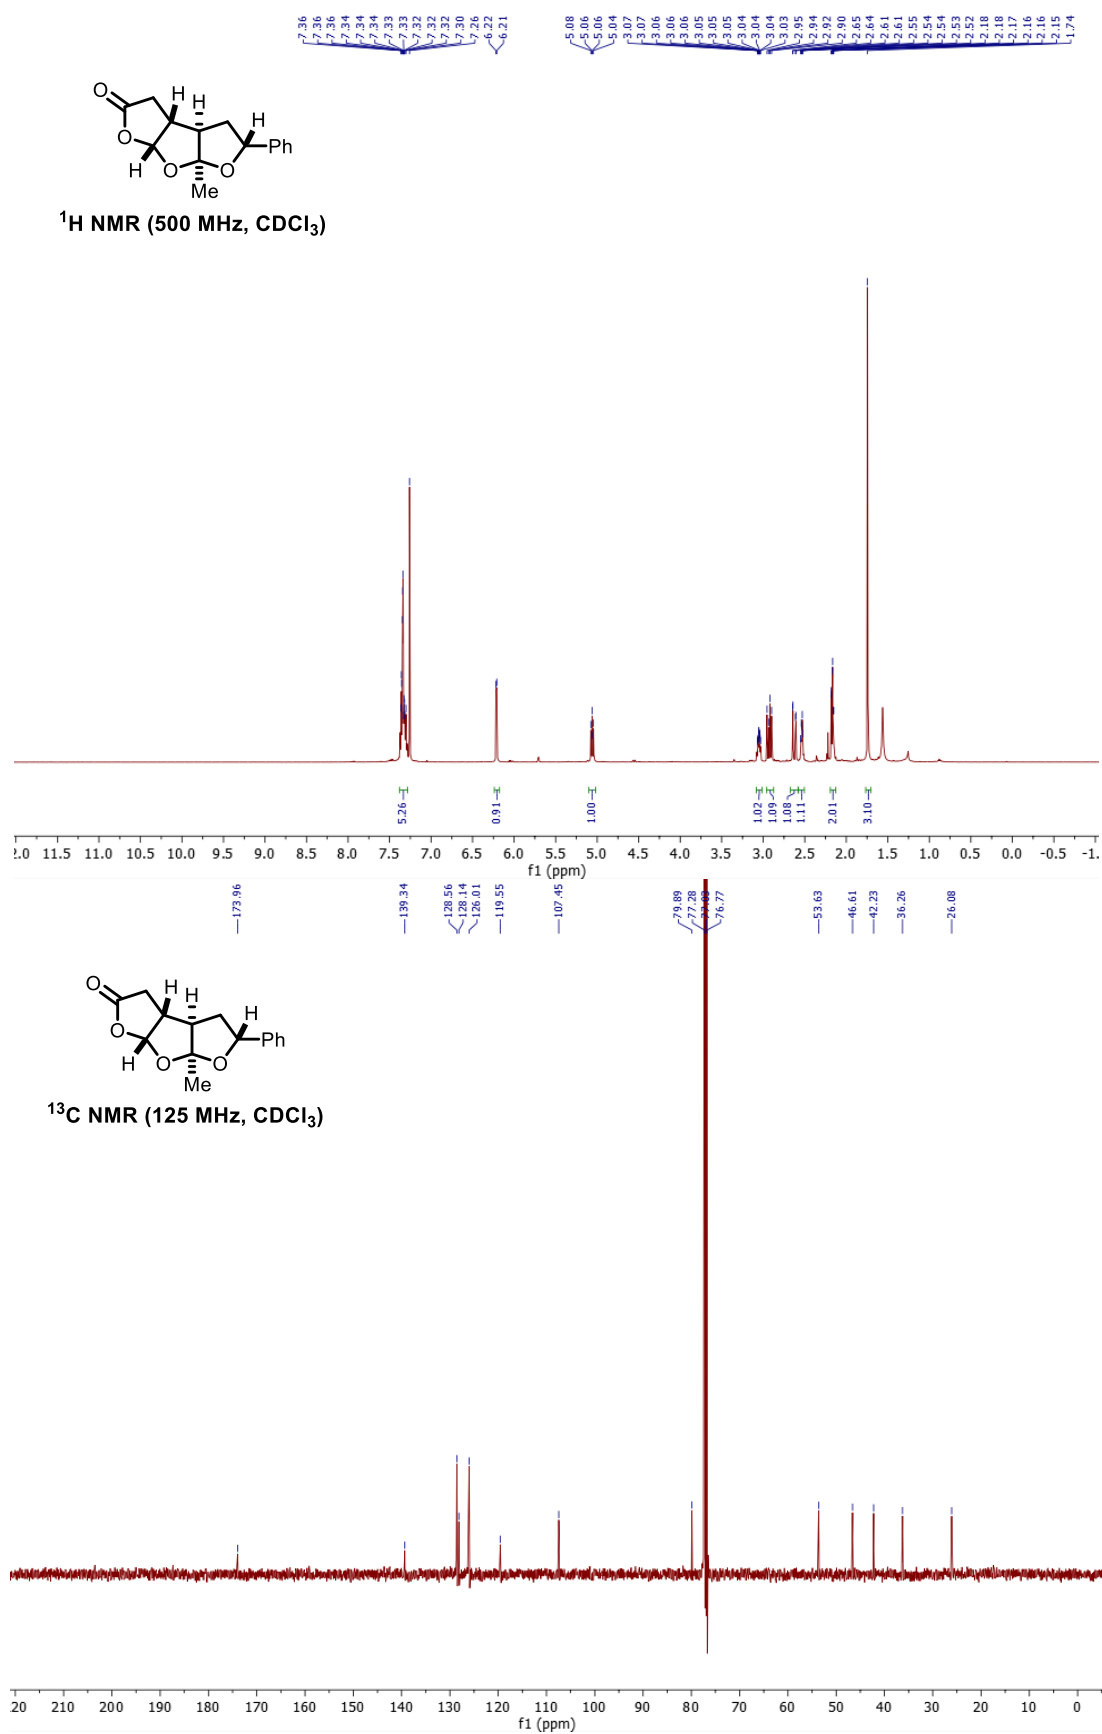

Supplement: NIHMS1713817-supplement-Supplementary_Material.pdf [file NIHMS1713817-supplement-Supplementary_Material.pdf]
